# Supplementary material for: Molecular and physiological acclimation to low light and iron scarcity in a globally abundant oceanic pelagophyte
Source: Nat Commun. 2026 Apr 20;17:5480. doi: 10.1038/s41467-026-71628-0 (PMC13284251; doi:10.1038/s41467-026-71628-0)
Supplement: Supplementary file 17 — Supplementary Data 15 [file 41467_2026_71628_MOESM17_ESM.xlsx]

## Sheet: All response types
Comparison	HL+FeDayvsLL+FeDay	HL+FeNightvsLL+FeNight	HL-FeDayvsLL-FeDay	HL-FeNightvsLL-FeNight	HL+FeDayvsHL-FeDay	HL+FeNightvsHL-FeNight	LL+FeDayvsLL-FeDay	LL+FeNightvsLL-FeNight	HL-FeDayvsHL-FeNight	HL+FeDayvsHL+FeNight	LL-FeDayvsLL-FeNight	LL+FeDayvsLL+FeNight	HL+FeDayvsLL+FeDay	HL+FeNightvsLL+FeNight	HL-FeDayvsLL-FeDay	HL-FeNightvsLL-FeNight	HL+FeDayvsHL-FeDay	HL+FeNightvsHL-FeNight	LL+FeDayvsLL-FeDay	LL+FeNightvsLL-FeNight	HL-FeDayvsHL-FeNight	HL+FeDayvsHL+FeNight	LL-FeDayvsLL-FeNight	LL+FeDayvsLL+FeNight
Condition	+FeDay	+FeNight	-FeDay	-FeNight	HLDay	HLNight	LLDay	LLNight	HL-Fe	HL+Fe	LL-Fe	LL+Fe	+FeDay	+FeNight	-FeDay	-FeNight	HLDay	HLNight	LLDay	LLNight	HL-Fe	HL+Fe	LL-Fe	LL+Fe
Response type	HL	HL	HL	HL	+Fe	+Fe	+Fe	+Fe	Day	Day	Day	Day	LL	LL	LL	LL	-Fe	-Fe	-Fe	-Fe	Night	Night	Night	Night
	augustus_masked-scf300000870586.0-processed-gene-2.33-mRNA-1	augustus_masked-deg300000870423-processed-gene-0.112-mRNA-1	augustus_masked-scf300000870593.0-processed-gene-6.142-mRNA-1	augustus_masked-scf300000870588.0-processed-gene-0.1-mRNA-1	augustus_masked-scf300000870586.0-processed-gene-1.20-mRNA-1	augustus_masked-deg300000870423-processed-gene-0.131-mRNA-1	augustus_masked-scf300000870586.0-processed-gene-0.109-mRNA-1	augustus_masked-scf300000870586.0-processed-gene-4.213-mRNA-1	augustus_masked-deg300000870423-processed-gene-0.112-mRNA-1	augustus_masked-deg300000870423-processed-gene-0.127-mRNA-1	augustus_masked-deg300000870423-processed-gene-0.112-mRNA-1	augustus_masked-deg300000870423-processed-gene-0.112-mRNA-1	augustus_masked-deg300000870423-processed-gene-0.112-mRNA-1	augustus_masked-scf300000870601.0-processed-gene-9.103-mRNA-1	augustus_masked-scf300000870586.0-processed-gene-2.31-mRNA-1	augustus_masked-scf300000870586.0-processed-gene-4.231-mRNA-1	augustus_masked-deg300000870423-processed-gene-0.112-mRNA-1	augustus_masked-deg300000870423-processed-gene-0.117-mRNA-1	augustus_masked-scf300000870586.0-processed-gene-2.33-mRNA-1	augustus_masked-deg300000870423-processed-gene-0.127-mRNA-1	augustus_masked-scf300000870586.0-processed-gene-0.89-mRNA-1	augustus_masked-deg300000870423-processed-gene-0.117-mRNA-1	augustus_masked-scf300000870586.0-processed-gene-0.109-mRNA-1	augustus_masked-scf300000870586.0-processed-gene-0.89-mRNA-1
	augustus_masked-scf300000870601.0-processed-gene-10.30-mRNA-1	augustus_masked-deg300000870423-processed-gene-0.127-mRNA-1	augustus_masked-scf300000870599.0-processed-gene-1.83-mRNA-1	augustus_masked-scf300000870593.0-processed-gene-1.8-mRNA-1	augustus_masked-scf300000870586.0-processed-gene-2.31-mRNA-1	augustus_masked-scf300000870586.0-processed-gene-3.120-mRNA-1	augustus_masked-scf300000870586.0-processed-gene-4.184-mRNA-1	augustus_masked-scf300000870588.0-processed-gene-0.0-mRNA-1	augustus_masked-deg300000870423-processed-gene-0.127-mRNA-1	augustus_masked-deg300000870423-processed-gene-0.132-mRNA-1	augustus_masked-deg300000870423-processed-gene-0.127-mRNA-1	augustus_masked-deg300000870423-processed-gene-0.127-mRNA-1	augustus_masked-deg300000870423-processed-gene-0.117-mRNA-1	augustus_masked-scf300000870629.0-processed-gene-0.38-mRNA-1	augustus_masked-scf300000870586.0-processed-gene-3.124-mRNA-1	augustus_masked-scf300000870593.0-processed-gene-0.44-mRNA-1	augustus_masked-deg300000870423-processed-gene-0.117-mRNA-1	augustus_masked-scf300000870601.0-processed-gene-1.14-mRNA-1	augustus_masked-scf300000870586.0-processed-gene-3.96-mRNA-1	augustus_masked-scf300000870586.0-processed-gene-2.34-mRNA-1	augustus_masked-scf300000870586.0-processed-gene-2.31-mRNA-1	augustus_masked-scf300000870586.0-processed-gene-0.109-mRNA-1	augustus_masked-scf300000870586.0-processed-gene-0.89-mRNA-1	augustus_masked-scf300000870586.0-processed-gene-4.213-mRNA-1
	augustus_masked-scf300000870601.0-processed-gene-14.131-mRNA-1	augustus_masked-deg300000870423-processed-gene-0.131-mRNA-1	augustus_masked-scf300000870601.0-processed-gene-19.231-mRNA-1	augustus_masked-scf300000870593.0-processed-gene-7.39-mRNA-1	augustus_masked-scf300000870586.0-processed-gene-4.213-mRNA-1	augustus_masked-scf300000870586.0-processed-gene-4.156-mRNA-1	augustus_masked-scf300000870586.0-processed-gene-4.190-mRNA-1	augustus_masked-scf300000870593.0-processed-gene-1.8-mRNA-1	augustus_masked-deg300000870423-processed-gene-0.131-mRNA-1	augustus_masked-scf300000870586.0-processed-gene-2.34-mRNA-1	augustus_masked-deg300000870423-processed-gene-0.131-mRNA-1	augustus_masked-deg300000870423-processed-gene-0.131-mRNA-1	augustus_masked-scf300000870586.0-processed-gene-0.109-mRNA-1	augustus_masked-scf300000870635.0-processed-gene-0.16-mRNA-1	augustus_masked-scf300000870586.0-processed-gene-3.96-mRNA-1	augustus_masked-scf300000870593.0-processed-gene-1.34-mRNA-1	augustus_masked-scf300000870599.0-processed-gene-1.70-mRNA-1	augustus_masked-scf300000870601.0-processed-gene-18.95-mRNA-1	augustus_masked-scf300000870586.0-processed-gene-4.213-mRNA-1	augustus_masked-scf300000870595.1-processed-gene-1.17-mRNA-1	augustus_masked-scf300000870586.0-processed-gene-4.159-mRNA-1	augustus_masked-scf300000870586.0-processed-gene-0.89-mRNA-1	augustus_masked-scf300000870595.0-processed-gene-5.21-mRNA-1	augustus_masked-scf300000870593.0-processed-gene-7.58-mRNA-1
	augustus_masked-scf300000870601.0-processed-gene-19.204-mRNA-1	augustus_masked-scf300000870586.0-processed-gene-3.120-mRNA-1	augustus_masked-scf300000870601.1-processed-gene-0.86-mRNA-1	augustus_masked-scf300000870595.0-processed-gene-4.164-mRNA-1	augustus_masked-scf300000870593.0-processed-gene-3.122-mRNA-1	augustus_masked-scf300000870586.0-processed-gene-4.231-mRNA-1	augustus_masked-scf300000870593.0-processed-gene-3.134-mRNA-1	augustus_masked-scf300000870593.0-processed-gene-2.81-mRNA-1	augustus_masked-deg300000870423-processed-gene-0.132-mRNA-1	augustus_masked-scf300000870593.0-processed-gene-1.34-mRNA-1	augustus_masked-deg300000870423-processed-gene-0.132-mRNA-1	augustus_masked-deg300000870423-processed-gene-0.132-mRNA-1	augustus_masked-scf300000870586.0-processed-gene-4.190-mRNA-1	augustus_masked-scf300000870651.1-processed-gene-6.165-mRNA-1	augustus_masked-scf300000870586.0-processed-gene-4.159-mRNA-1	augustus_masked-scf300000870595.0-processed-gene-1.67-mRNA-1	augustus_masked-scf300000870601.0-processed-gene-0.4-mRNA-1	augustus_masked-scf300000870601.0-processed-gene-5.15-mRNA-1	augustus_masked-scf300000870586.0-processed-gene-4.231-mRNA-1	augustus_masked-scf300000870601.0-processed-gene-0.4-mRNA-1	augustus_masked-scf300000870593.0-processed-gene-1.8-mRNA-1	augustus_masked-scf300000870588.0-processed-gene-0.1-mRNA-1	augustus_masked-scf300000870595.1-processed-gene-1.17-mRNA-1	augustus_masked-scf300000870595.0-processed-gene-5.21-mRNA-1
	augustus_masked-scf300000870601.0-processed-gene-19.260-mRNA-1	augustus_masked-scf300000870593.0-processed-gene-7.23-mRNA-1	augustus_masked-scf300000870601.1-processed-gene-3.87-mRNA-1	augustus_masked-scf300000870601.0-processed-gene-18.95-mRNA-1	augustus_masked-scf300000870593.0-processed-gene-6.141-mRNA-1	augustus_masked-scf300000870593.0-processed-gene-1.34-mRNA-1	augustus_masked-scf300000870593.0-processed-gene-6.141-mRNA-1	augustus_masked-scf300000870593.0-processed-gene-6.141-mRNA-1	augustus_masked-scf300000870586.0-processed-gene-3.120-mRNA-1	augustus_masked-scf300000870593.0-processed-gene-7.39-mRNA-1	augustus_masked-scf300000870586.0-processed-gene-4.210-mRNA-1	augustus_masked-scf300000870586.0-processed-gene-3.120-mRNA-1	augustus_masked-scf300000870593.0-processed-gene-3.134-mRNA-1	augustus_masked-scf300000870673.1-processed-gene-0.71-mRNA-1	augustus_masked-scf300000870586.0-processed-gene-4.212-mRNA-1	augustus_masked-scf300000870595.0-processed-gene-2.122-mRNA-1	augustus_masked-scf300000870601.0-processed-gene-11.108-mRNA-1	augustus_masked-scf300000870601.0-processed-gene-9.103-mRNA-1	augustus_masked-scf300000870586.0-processed-gene-4.233-mRNA-1	augustus_masked-scf300000870601.0-processed-gene-14.131-mRNA-1	augustus_masked-scf300000870593.0-processed-gene-3.122-mRNA-1	augustus_masked-scf300000870593.0-processed-gene-1.19-mRNA-1	augustus_masked-scf300000870595.1-processed-gene-1.45-mRNA-1	augustus_masked-scf300000870595.1-processed-gene-1.45-mRNA-1
	augustus_masked-scf300000870601.0-processed-gene-6.99-mRNA-1	augustus_masked-scf300000870595.0-processed-gene-6.62-mRNA-1	augustus_masked-scf300000870603.0-processed-gene-10.102-mRNA-1	augustus_masked-scf300000870601.0-processed-gene-19.204-mRNA-1	augustus_masked-scf300000870593.0-processed-gene-7.62-mRNA-1	augustus_masked-scf300000870593.0-processed-gene-3.134-mRNA-1	augustus_masked-scf300000870601.0-processed-gene-13.94-mRNA-1	augustus_masked-scf300000870595.0-processed-gene-0.83-mRNA-1	augustus_masked-scf300000870586.0-processed-gene-4.156-mRNA-1	augustus_masked-scf300000870593.0-processed-gene-7.68-mRNA-1	augustus_masked-scf300000870586.0-processed-gene-4.213-mRNA-1	augustus_masked-scf300000870586.0-processed-gene-4.156-mRNA-1	augustus_masked-scf300000870601.0-processed-gene-0.4-mRNA-1	augustus_masked-scf300000870735.0-processed-gene-13.124-mRNA-1	augustus_masked-scf300000870586.0-processed-gene-4.213-mRNA-1	augustus_masked-scf300000870595.1-processed-gene-1.17-mRNA-1	augustus_masked-scf300000870601.0-processed-gene-13.108-mRNA-1	augustus_masked-scf300000870603.0-processed-gene-3.35-mRNA-1	augustus_masked-scf300000870593.0-processed-gene-0.42-mRNA-1	augustus_masked-scf300000870601.0-processed-gene-18.77-mRNA-1	augustus_masked-scf300000870593.0-processed-gene-7.58-mRNA-1	augustus_masked-scf300000870593.0-processed-gene-1.8-mRNA-1	augustus_masked-scf300000870601.0-processed-gene-18.119-mRNA-1	augustus_masked-scf300000870599.0-processed-gene-1.83-mRNA-1
	augustus_masked-scf300000870601.0-processed-gene-7.54-mRNA-1	augustus_masked-scf300000870601.0-processed-gene-10.30-mRNA-1	augustus_masked-scf300000870603.0-processed-gene-12.27-mRNA-1	augustus_masked-scf300000870603.0-processed-gene-3.35-mRNA-1	augustus_masked-scf300000870595.0-processed-gene-1.69-mRNA-1	augustus_masked-scf300000870593.0-processed-gene-6.141-mRNA-1	augustus_masked-scf300000870601.0-processed-gene-18.119-mRNA-1	augustus_masked-scf300000870595.0-processed-gene-4.164-mRNA-1	augustus_masked-scf300000870586.0-processed-gene-4.231-mRNA-1	augustus_masked-scf300000870601.0-processed-gene-1.14-mRNA-1	augustus_masked-scf300000870593.0-processed-gene-0.11-mRNA-1	augustus_masked-scf300000870586.0-processed-gene-4.190-mRNA-1	augustus_masked-scf300000870601.0-processed-gene-5.20-mRNA-1	augustus_masked-scf300000870743.0-processed-gene-4.21-mRNA-1	augustus_masked-scf300000870593.0-processed-gene-0.11-mRNA-1	augustus_masked-scf300000870599.0-processed-gene-1.70-mRNA-1	augustus_masked-scf300000870601.0-processed-gene-17.111-mRNA-1	augustus_masked-scf300000870603.0-processed-gene-9.16-mRNA-1	augustus_masked-scf300000870593.0-processed-gene-1.38-mRNA-1	augustus_masked-scf300000870601.1-processed-gene-1.86-mRNA-1	augustus_masked-scf300000870595.0-processed-gene-5.21-mRNA-1	augustus_masked-scf300000870593.0-processed-gene-3.135-mRNA-1	augustus_masked-scf300000870601.0-processed-gene-19.231-mRNA-1	augustus_masked-scf300000870601.0-processed-gene-1.39-mRNA-1
	augustus_masked-scf300000870601.1-processed-gene-3.87-mRNA-1	augustus_masked-scf300000870601.0-processed-gene-19.260-mRNA-1	augustus_masked-scf300000870603.0-processed-gene-13.101-mRNA-1	augustus_masked-scf300000870603.0-processed-gene-5.100-mRNA-1	augustus_masked-scf300000870595.1-processed-gene-1.17-mRNA-1	augustus_masked-scf300000870593.0-processed-gene-6.142-mRNA-1	augustus_masked-scf300000870601.0-processed-gene-19.182-mRNA-1	augustus_masked-scf300000870599.0-processed-gene-0.23-mRNA-1	augustus_masked-scf300000870593.0-processed-gene-0.42-mRNA-1	augustus_masked-scf300000870601.0-processed-gene-14.118-mRNA-1	augustus_masked-scf300000870593.0-processed-gene-0.42-mRNA-1	augustus_masked-scf300000870593.0-processed-gene-1.34-mRNA-1	augustus_masked-scf300000870601.0-processed-gene-7.35-mRNA-1	augustus_masked-scf300000870749.0-processed-gene-18.45-mRNA-1	augustus_masked-scf300000870593.0-processed-gene-0.42-mRNA-1	augustus_masked-scf300000870601.0-processed-gene-1.35-mRNA-1	augustus_masked-scf300000870601.0-processed-gene-7.35-mRNA-1	augustus_masked-scf300000870605.0-processed-gene-0.163-mRNA-1	augustus_masked-scf300000870593.0-processed-gene-4.129-mRNA-1	augustus_masked-scf300000870601.1-processed-gene-2.115-mRNA-1	augustus_masked-scf300000870595.1-processed-gene-1.17-mRNA-1	augustus_masked-scf300000870593.0-processed-gene-7.38-mRNA-1	augustus_masked-scf300000870601.0-processed-gene-5.20-mRNA-1	augustus_masked-scf300000870601.0-processed-gene-11.108-mRNA-1
	augustus_masked-scf300000870603.0-processed-gene-10.102-mRNA-1	augustus_masked-scf300000870603.0-processed-gene-12.35-mRNA-1	augustus_masked-scf300000870631.0-processed-gene-0.46-mRNA-1	augustus_masked-scf300000870605.0-processed-gene-0.163-mRNA-1	augustus_masked-scf300000870601.0-processed-gene-13.93-mRNA-1	augustus_masked-scf300000870595.0-processed-gene-6.62-mRNA-1	augustus_masked-scf300000870601.0-processed-gene-19.231-mRNA-1	augustus_masked-scf300000870599.0-processed-gene-1.83-mRNA-1	augustus_masked-scf300000870593.0-processed-gene-1.34-mRNA-1	augustus_masked-scf300000870601.0-processed-gene-14.131-mRNA-1	augustus_masked-scf300000870593.0-processed-gene-1.38-mRNA-1	augustus_masked-scf300000870593.0-processed-gene-3.122-mRNA-1	augustus_masked-scf300000870601.0-processed-gene-9.103-mRNA-1	augustus_masked-scf300000870752.0-processed-gene-0.14-mRNA-1	augustus_masked-scf300000870593.0-processed-gene-3.122-mRNA-1	augustus_masked-scf300000870601.0-processed-gene-14.131-mRNA-1	augustus_masked-scf300000870601.0-processed-gene-9.103-mRNA-1	augustus_masked-scf300000870611.0-processed-gene-0.52-mRNA-1	augustus_masked-scf300000870593.0-processed-gene-5.16-mRNA-1	augustus_masked-scf300000870601.1-processed-gene-6.20-mRNA-1	augustus_masked-scf300000870595.1-processed-gene-1.45-mRNA-1	augustus_masked-scf300000870593.0-processed-gene-7.58-mRNA-1	augustus_masked-scf300000870601.0-processed-gene-6.117-mRNA-1	augustus_masked-scf300000870601.0-processed-gene-6.104-mRNA-1
	augustus_masked-scf300000870603.0-processed-gene-17.96-mRNA-1	augustus_masked-scf300000870603.0-processed-gene-13.101-mRNA-1	augustus_masked-scf300000870631.0-processed-gene-4.136-mRNA-1	augustus_masked-scf300000870605.0-processed-gene-0.192-mRNA-1	augustus_masked-scf300000870601.0-processed-gene-18.119-mRNA-1	augustus_masked-scf300000870599.0-processed-gene-1.43-mRNA-1	augustus_masked-scf300000870601.0-processed-gene-5.20-mRNA-1	augustus_masked-scf300000870601.0-processed-gene-1.42-mRNA-1	augustus_masked-scf300000870593.0-processed-gene-6.142-mRNA-1	augustus_masked-scf300000870601.0-processed-gene-18.95-mRNA-1	augustus_masked-scf300000870593.0-processed-gene-1.8-mRNA-1	augustus_masked-scf300000870593.0-processed-gene-3.134-mRNA-1	augustus_masked-scf300000870603.0-processed-gene-9.12-mRNA-1	augustus_masked-scf300000870752.0-processed-gene-1.25-mRNA-1	augustus_masked-scf300000870593.0-processed-gene-4.129-mRNA-1	augustus_masked-scf300000870601.0-processed-gene-17.93-mRNA-1	augustus_masked-scf300000870601.1-processed-gene-4.32-mRNA-1	augustus_masked-scf300000870619.2-processed-gene-3.0-mRNA-1	augustus_masked-scf300000870593.0-processed-gene-7.33-mRNA-1	augustus_masked-scf300000870603.0-processed-gene-12.35-mRNA-1	augustus_masked-scf300000870601.0-processed-gene-1.11-mRNA-1	augustus_masked-scf300000870595.0-processed-gene-5.21-mRNA-1	augustus_masked-scf300000870601.0-processed-gene-7.35-mRNA-1	augustus_masked-scf300000870601.0-processed-gene-7.35-mRNA-1
	augustus_masked-scf300000870603.0-processed-gene-4.33-mRNA-1	augustus_masked-scf300000870603.0-processed-gene-16.25-mRNA-1	augustus_masked-scf300000870642.2-processed-gene-0.30-mRNA-1	augustus_masked-scf300000870643.0-processed-gene-0.1-mRNA-1	augustus_masked-scf300000870601.0-processed-gene-19.235-mRNA-1	augustus_masked-scf300000870601.0-processed-gene-17.113-mRNA-1	augustus_masked-scf300000870601.0-processed-gene-6.117-mRNA-1	augustus_masked-scf300000870601.0-processed-gene-17.113-mRNA-1	augustus_masked-scf300000870593.0-processed-gene-7.39-mRNA-1	augustus_masked-scf300000870601.0-processed-gene-19.204-mRNA-1	augustus_masked-scf300000870593.0-processed-gene-2.81-mRNA-1	augustus_masked-scf300000870593.0-processed-gene-7.2-mRNA-1	augustus_masked-scf300000870603.0-processed-gene-9.16-mRNA-1	augustus_masked-scf300000870752.0-processed-gene-6.193-mRNA-1	augustus_masked-scf300000870595.0-processed-gene-2.135-mRNA-1	augustus_masked-scf300000870601.0-processed-gene-6.141-mRNA-1	augustus_masked-scf300000870603.0-processed-gene-3.26-mRNA-1	augustus_masked-scf300000870619.2-processed-gene-4.52-mRNA-1	augustus_masked-scf300000870595.0-processed-gene-2.135-mRNA-1	augustus_masked-scf300000870603.0-processed-gene-15.47-mRNA-1	augustus_masked-scf300000870601.0-processed-gene-5.15-mRNA-1	augustus_masked-scf300000870595.0-processed-gene-6.62-mRNA-1	augustus_masked-scf300000870601.1-processed-gene-6.20-mRNA-1	augustus_masked-scf300000870601.1-processed-gene-5.89-mRNA-1
	augustus_masked-scf300000870605.0-processed-gene-0.163-mRNA-1	augustus_masked-scf300000870603.0-processed-gene-3.21-mRNA-1	augustus_masked-scf300000870645.0-processed-gene-0.76-mRNA-1	augustus_masked-scf300000870673.1-processed-gene-1.41-mRNA-1	augustus_masked-scf300000870601.0-processed-gene-19.260-mRNA-1	augustus_masked-scf300000870601.0-processed-gene-17.120-mRNA-1	augustus_masked-scf300000870601.0-processed-gene-7.35-mRNA-1	augustus_masked-scf300000870603.0-processed-gene-1.27-mRNA-1	augustus_masked-scf300000870595.0-processed-gene-1.67-mRNA-1	augustus_masked-scf300000870601.0-processed-gene-19.207-mRNA-1	augustus_masked-scf300000870593.0-processed-gene-3.122-mRNA-1	augustus_masked-scf300000870593.0-processed-gene-7.23-mRNA-1	augustus_masked-scf300000870619.2-processed-gene-2.119-mRNA-1	augustus_masked-scf300000870754.0-processed-gene-11.119-mRNA-1	augustus_masked-scf300000870595.0-processed-gene-6.35-mRNA-1	augustus_masked-scf300000870601.1-processed-gene-1.86-mRNA-1	augustus_masked-scf300000870603.0-processed-gene-3.35-mRNA-1	augustus_masked-scf300000870624.0-processed-gene-0.15-mRNA-1	augustus_masked-scf300000870595.0-processed-gene-6.35-mRNA-1	augustus_masked-scf300000870603.0-processed-gene-16.16-mRNA-1	augustus_masked-scf300000870601.0-processed-gene-5.20-mRNA-1	augustus_masked-scf300000870601.0-processed-gene-0.4-mRNA-1	augustus_masked-scf300000870603.0-processed-gene-1.20-mRNA-1	augustus_masked-scf300000870603.0-processed-gene-0.86-mRNA-1
	augustus_masked-scf300000870605.0-processed-gene-0.167-mRNA-1	augustus_masked-scf300000870605.0-processed-gene-0.167-mRNA-1	augustus_masked-scf300000870651.1-processed-gene-2.15-mRNA-1	augustus_masked-scf300000870673.1-processed-gene-1.78-mRNA-1	augustus_masked-scf300000870601.0-processed-gene-6.104-mRNA-1	augustus_masked-scf300000870601.0-processed-gene-19.209-mRNA-1	augustus_masked-scf300000870601.0-processed-gene-9.113-mRNA-1	augustus_masked-scf300000870607.0-processed-gene-0.67-mRNA-1	augustus_masked-scf300000870599.0-processed-gene-1.43-mRNA-1	augustus_masked-scf300000870601.0-processed-gene-19.260-mRNA-1	augustus_masked-scf300000870593.0-processed-gene-3.131-mRNA-1	augustus_masked-scf300000870593.0-processed-gene-7.39-mRNA-1	augustus_masked-scf300000870619.2-processed-gene-3.23-mRNA-1	augustus_masked-scf300000870754.0-processed-gene-5.46-mRNA-1	augustus_masked-scf300000870595.1-processed-gene-1.17-mRNA-1	augustus_masked-scf300000870601.1-processed-gene-2.99-mRNA-1	augustus_masked-scf300000870619.2-processed-gene-2.119-mRNA-1	augustus_masked-scf300000870629.0-processed-gene-1.25-mRNA-1	augustus_masked-scf300000870595.1-processed-gene-2.46-mRNA-1	augustus_masked-scf300000870603.0-processed-gene-3.35-mRNA-1	augustus_masked-scf300000870601.0-processed-gene-6.104-mRNA-1	augustus_masked-scf300000870601.0-processed-gene-1.39-mRNA-1	augustus_masked-scf300000870603.0-processed-gene-14.34-mRNA-1	augustus_masked-scf300000870603.0-processed-gene-0.97-mRNA-1
	augustus_masked-scf300000870607.0-processed-gene-1.111-mRNA-1	augustus_masked-scf300000870605.0-processed-gene-0.192-mRNA-1	augustus_masked-scf300000870651.1-processed-gene-4.127-mRNA-1	augustus_masked-scf300000870673.2-processed-gene-11.89-mRNA-1	augustus_masked-scf300000870601.0-processed-gene-7.61-mRNA-1	augustus_masked-scf300000870601.0-processed-gene-6.141-mRNA-1	augustus_masked-scf300000870601.1-processed-gene-1.98-mRNA-1	augustus_masked-scf300000870613.1-processed-gene-0.58-mRNA-1	augustus_masked-scf300000870599.0-processed-gene-1.70-mRNA-1	augustus_masked-scf300000870601.0-processed-gene-2.64-mRNA-1	augustus_masked-scf300000870593.0-processed-gene-4.129-mRNA-1	augustus_masked-scf300000870593.0-processed-gene-7.68-mRNA-1	augustus_masked-scf300000870619.2-processed-gene-3.48-mRNA-1	augustus_masked-scf300000870754.0-processed-gene-8.108-mRNA-1	augustus_masked-scf300000870601.0-processed-gene-0.4-mRNA-1	augustus_masked-scf300000870601.1-processed-gene-3.87-mRNA-1	augustus_masked-scf300000870619.2-processed-gene-2.131-mRNA-1	augustus_masked-scf300000870629.0-processed-gene-5.84-mRNA-1	augustus_masked-scf300000870601.0-processed-gene-0.4-mRNA-1	augustus_masked-scf300000870603.0-processed-gene-9.40-mRNA-1	augustus_masked-scf300000870601.0-processed-gene-6.117-mRNA-1	augustus_masked-scf300000870601.0-processed-gene-11.108-mRNA-1	augustus_masked-scf300000870603.0-processed-gene-2.89-mRNA-1	augustus_masked-scf300000870603.0-processed-gene-1.20-mRNA-1
	augustus_masked-scf300000870631.0-processed-gene-4.113-mRNA-1	augustus_masked-scf300000870605.0-processed-gene-0.212-mRNA-1	augustus_masked-scf300000870651.1-processed-gene-5.56-mRNA-1	augustus_masked-scf300000870673.2-processed-gene-13.89-mRNA-1	augustus_masked-scf300000870601.0-processed-gene-9.113-mRNA-1	augustus_masked-scf300000870601.0-processed-gene-9.113-mRNA-1	augustus_masked-scf300000870601.1-processed-gene-2.99-mRNA-1	augustus_masked-scf300000870619.2-processed-gene-2.105-mRNA-1	augustus_masked-scf300000870601.0-processed-gene-1.35-mRNA-1	augustus_masked-scf300000870601.0-processed-gene-6.99-mRNA-1	augustus_masked-scf300000870593.0-processed-gene-5.16-mRNA-1	augustus_masked-scf300000870601.0-processed-gene-0.4-mRNA-1	augustus_masked-scf300000870619.2-processed-gene-4.52-mRNA-1	augustus_masked-scf300000870754.0-processed-gene-8.113-mRNA-1	augustus_masked-scf300000870601.0-processed-gene-1.11-mRNA-1	augustus_masked-scf300000870601.1-processed-gene-5.107-mRNA-1	augustus_masked-scf300000870619.2-processed-gene-3.23-mRNA-1	augustus_masked-scf300000870629.0-processed-gene-5.85-mRNA-1	augustus_masked-scf300000870601.0-processed-gene-1.11-mRNA-1	augustus_masked-scf300000870607.0-processed-gene-1.111-mRNA-1	augustus_masked-scf300000870601.0-processed-gene-7.35-mRNA-1	augustus_masked-scf300000870601.0-processed-gene-5.15-mRNA-1	augustus_masked-scf300000870603.0-processed-gene-9.12-mRNA-1	augustus_masked-scf300000870603.0-processed-gene-18.256-mRNA-1
	augustus_masked-scf300000870641.0-processed-gene-1.156-mRNA-1	augustus_masked-scf300000870631.0-processed-gene-2.87-mRNA-1	augustus_masked-scf300000870662.0-processed-gene-6.85-mRNA-1	augustus_masked-scf300000870673.2-processed-gene-4.32-mRNA-1	augustus_masked-scf300000870601.1-processed-gene-1.98-mRNA-1	augustus_masked-scf300000870601.1-processed-gene-0.86-mRNA-1	augustus_masked-scf300000870601.1-processed-gene-3.110-mRNA-1	augustus_masked-scf300000870631.0-processed-gene-1.126-mRNA-1	augustus_masked-scf300000870601.0-processed-gene-10.13-mRNA-1	augustus_masked-scf300000870601.1-processed-gene-1.86-mRNA-1	augustus_masked-scf300000870593.0-processed-gene-7.33-mRNA-1	augustus_masked-scf300000870601.0-processed-gene-18.95-mRNA-1	augustus_masked-scf300000870619.2-processed-gene-4.67-mRNA-1	augustus_masked-scf300000870754.0-processed-gene-8.93-mRNA-1	augustus_masked-scf300000870601.0-processed-gene-14.131-mRNA-1	augustus_masked-scf300000870601.1-processed-gene-5.89-mRNA-1	augustus_masked-scf300000870619.2-processed-gene-3.6-mRNA-1	augustus_masked-scf300000870643.0-processed-gene-0.1-mRNA-1	augustus_masked-scf300000870601.0-processed-gene-10.13-mRNA-1	augustus_masked-scf300000870619.2-processed-gene-3.10-mRNA-1	augustus_masked-scf300000870601.0-processed-gene-9.103-mRNA-1	augustus_masked-scf300000870601.0-processed-gene-6.104-mRNA-1	augustus_masked-scf300000870603.0-processed-gene-9.16-mRNA-1	augustus_masked-scf300000870603.0-processed-gene-3.35-mRNA-1
	augustus_masked-scf300000870651.1-processed-gene-6.166-mRNA-1	augustus_masked-scf300000870651.1-processed-gene-2.16-mRNA-1	augustus_masked-scf300000870662.0-processed-gene-7.34-mRNA-1	augustus_masked-scf300000870673.2-processed-gene-6.41-mRNA-1	augustus_masked-scf300000870601.1-processed-gene-2.118-mRNA-1	augustus_masked-scf300000870601.1-processed-gene-2.99-mRNA-1	augustus_masked-scf300000870603.0-processed-gene-10.102-mRNA-1	augustus_masked-scf300000870642.2-processed-gene-0.41-mRNA-1	augustus_masked-scf300000870601.0-processed-gene-10.29-mRNA-1	augustus_masked-scf300000870603.0-processed-gene-10.102-mRNA-1	augustus_masked-scf300000870593.0-processed-gene-7.39-mRNA-1	augustus_masked-scf300000870601.0-processed-gene-19.204-mRNA-1	augustus_masked-scf300000870629.0-processed-gene-3.77-mRNA-1	maker-scf300000870586.0-snap-gene-0.59-mRNA-1	augustus_masked-scf300000870601.0-processed-gene-6.104-mRNA-1	augustus_masked-scf300000870601.1-processed-gene-6.20-mRNA-1	augustus_masked-scf300000870619.2-processed-gene-4.52-mRNA-1	augustus_masked-scf300000870662.0-processed-gene-8.62-mRNA-1	augustus_masked-scf300000870601.0-processed-gene-10.29-mRNA-1	augustus_masked-scf300000870629.0-processed-gene-2.41-mRNA-1	augustus_masked-scf300000870601.1-processed-gene-0.127-mRNA-1	augustus_masked-scf300000870601.0-processed-gene-6.117-mRNA-1	augustus_masked-scf300000870607.0-processed-gene-1.94-mRNA-1	augustus_masked-scf300000870603.0-processed-gene-4.4-mRNA-1
	augustus_masked-scf300000870651.1-processed-gene-6.198-mRNA-1	augustus_masked-scf300000870662.0-processed-gene-3.104-mRNA-1	augustus_masked-scf300000870662.0-processed-gene-8.81-mRNA-1	augustus_masked-scf300000870693.1-processed-gene-2.25-mRNA-1	augustus_masked-scf300000870601.1-processed-gene-2.99-mRNA-1	augustus_masked-scf300000870601.1-processed-gene-3.87-mRNA-1	augustus_masked-scf300000870603.0-processed-gene-13.101-mRNA-1	augustus_masked-scf300000870651.1-processed-gene-2.4-mRNA-1	augustus_masked-scf300000870601.0-processed-gene-10.30-mRNA-1	augustus_masked-scf300000870603.0-processed-gene-12.35-mRNA-1	augustus_masked-scf300000870595.0-processed-gene-2.135-mRNA-1	augustus_masked-scf300000870601.0-processed-gene-19.207-mRNA-1	augustus_masked-scf300000870629.0-processed-gene-4.44-mRNA-1	maker-scf300000870586.0-snap-gene-0.75-mRNA-1	augustus_masked-scf300000870601.0-processed-gene-8.35-mRNA-1	augustus_masked-scf300000870603.0-processed-gene-0.86-mRNA-1	augustus_masked-scf300000870619.2-processed-gene-4.66-mRNA-1	augustus_masked-scf300000870673.0-processed-gene-0.56-mRNA-1	augustus_masked-scf300000870601.0-processed-gene-11.127-mRNA-1	augustus_masked-scf300000870629.0-processed-gene-4.40-mRNA-1	augustus_masked-scf300000870601.1-processed-gene-1.74-mRNA-1	augustus_masked-scf300000870601.0-processed-gene-7.35-mRNA-1	augustus_masked-scf300000870619.2-processed-gene-0.21-mRNA-1	augustus_masked-scf300000870603.0-processed-gene-9.16-mRNA-1
	augustus_masked-scf300000870662.0-processed-gene-2.39-mRNA-1	augustus_masked-scf300000870693.1-processed-gene-0.83-mRNA-1	augustus_masked-scf300000870672.0-processed-gene-0.4-mRNA-1	augustus_masked-scf300000870733.0-processed-gene-0.65-mRNA-1	augustus_masked-scf300000870603.0-processed-gene-0.86-mRNA-1	augustus_masked-scf300000870601.1-processed-gene-5.89-mRNA-1	augustus_masked-scf300000870603.0-processed-gene-13.132-mRNA-1	augustus_masked-scf300000870651.1-processed-gene-6.166-mRNA-1	augustus_masked-scf300000870601.0-processed-gene-11.127-mRNA-1	augustus_masked-scf300000870603.0-processed-gene-13.101-mRNA-1	augustus_masked-scf300000870595.0-processed-gene-6.35-mRNA-1	augustus_masked-scf300000870601.0-processed-gene-19.214-mRNA-1	augustus_masked-scf300000870629.0-processed-gene-4.52-mRNA-1	maker-scf300000870586.0-snap-gene-1.72-mRNA-1	augustus_masked-scf300000870601.0-processed-gene-9.103-mRNA-1	augustus_masked-scf300000870603.0-processed-gene-10.95-mRNA-1	augustus_masked-scf300000870619.2-processed-gene-4.67-mRNA-1	augustus_masked-scf300000870673.2-processed-gene-11.99-mRNA-1	augustus_masked-scf300000870601.0-processed-gene-14.131-mRNA-1	augustus_masked-scf300000870629.0-processed-gene-4.51-mRNA-1	augustus_masked-scf300000870601.1-processed-gene-2.118-mRNA-1	augustus_masked-scf300000870601.0-processed-gene-9.103-mRNA-1	augustus_masked-scf300000870619.2-processed-gene-4.46-mRNA-1	augustus_masked-scf300000870607.0-processed-gene-0.67-mRNA-1
	augustus_masked-scf300000870662.0-processed-gene-5.26-mRNA-1	augustus_masked-scf300000870735.0-processed-gene-14.241-mRNA-1	augustus_masked-scf300000870673.1-processed-gene-1.41-mRNA-1	augustus_masked-scf300000870735.0-processed-gene-1.110-mRNA-1	augustus_masked-scf300000870603.0-processed-gene-13.101-mRNA-1	augustus_masked-scf300000870603.0-processed-gene-0.86-mRNA-1	augustus_masked-scf300000870603.0-processed-gene-18.229-mRNA-1	augustus_masked-scf300000870651.1-processed-gene-6.198-mRNA-1	augustus_masked-scf300000870601.0-processed-gene-13.108-mRNA-1	augustus_masked-scf300000870603.0-processed-gene-17.96-mRNA-1	augustus_masked-scf300000870601.0-processed-gene-10.13-mRNA-1	augustus_masked-scf300000870601.0-processed-gene-19.260-mRNA-1	augustus_masked-scf300000870629.0-processed-gene-5.85-mRNA-1	maker-scf300000870586.0-snap-gene-3.76-mRNA-1	augustus_masked-scf300000870601.1-processed-gene-5.89-mRNA-1	augustus_masked-scf300000870603.0-processed-gene-11.105-mRNA-1	augustus_masked-scf300000870629.0-processed-gene-3.77-mRNA-1	augustus_masked-scf300000870673.2-processed-gene-13.89-mRNA-1	augustus_masked-scf300000870601.0-processed-gene-4.119-mRNA-1	augustus_masked-scf300000870629.0-processed-gene-5.85-mRNA-1	augustus_masked-scf300000870603.0-processed-gene-1.20-mRNA-1	augustus_masked-scf300000870601.0-processed-gene-9.121-mRNA-1	augustus_masked-scf300000870626.0-processed-gene-0.13-mRNA-1	augustus_masked-scf300000870619.2-processed-gene-3.23-mRNA-1
	augustus_masked-scf300000870673.2-processed-gene-15.164-mRNA-1	augustus_masked-scf300000870744.0-processed-gene-1.53-mRNA-1	augustus_masked-scf300000870673.2-processed-gene-3.21-mRNA-1	augustus_masked-scf300000870744.1-processed-gene-3.102-mRNA-1	augustus_masked-scf300000870603.0-processed-gene-13.132-mRNA-1	augustus_masked-scf300000870603.0-processed-gene-10.95-mRNA-1	augustus_masked-scf300000870603.0-processed-gene-5.100-mRNA-1	augustus_masked-scf300000870662.0-processed-gene-0.109-mRNA-1	augustus_masked-scf300000870601.0-processed-gene-14.131-mRNA-1	augustus_masked-scf300000870603.0-processed-gene-2.72-mRNA-1	augustus_masked-scf300000870601.0-processed-gene-10.29-mRNA-1	augustus_masked-scf300000870601.0-processed-gene-6.99-mRNA-1	augustus_masked-scf300000870631.0-processed-gene-0.48-mRNA-1	maker-scf300000870595.0-snap-gene-3.69-mRNA-1	augustus_masked-scf300000870601.1-processed-gene-6.20-mRNA-1	augustus_masked-scf300000870603.0-processed-gene-12.35-mRNA-1	augustus_masked-scf300000870629.0-processed-gene-5.84-mRNA-1	augustus_masked-scf300000870673.2-processed-gene-6.23-mRNA-1	augustus_masked-scf300000870601.0-processed-gene-7.54-mRNA-1	augustus_masked-scf300000870651.1-processed-gene-5.34-mRNA-1	augustus_masked-scf300000870603.0-processed-gene-1.7-mRNA-1	augustus_masked-scf300000870601.1-processed-gene-5.89-mRNA-1	augustus_masked-scf300000870631.0-processed-gene-0.27-mRNA-1	augustus_masked-scf300000870619.2-processed-gene-4.52-mRNA-1
	augustus_masked-scf300000870673.2-processed-gene-2.116-mRNA-1	augustus_masked-scf300000870744.1-processed-gene-4.17-mRNA-1	augustus_masked-scf300000870673.2-processed-gene-6.22-mRNA-1	augustus_masked-scf300000870744.1-processed-gene-5.211-mRNA-1	augustus_masked-scf300000870603.0-processed-gene-15.29-mRNA-1	augustus_masked-scf300000870603.0-processed-gene-12.27-mRNA-1	augustus_masked-scf300000870603.0-processed-gene-9.12-mRNA-1	augustus_masked-scf300000870662.0-processed-gene-10.103-mRNA-1	augustus_masked-scf300000870601.0-processed-gene-17.111-mRNA-1	augustus_masked-scf300000870603.0-processed-gene-3.21-mRNA-1	augustus_masked-scf300000870601.0-processed-gene-11.127-mRNA-1	augustus_masked-scf300000870601.0-processed-gene-9.113-mRNA-1	augustus_masked-scf300000870643.0-processed-gene-0.1-mRNA-1	maker-scf300000870601.0-snap-gene-3.66-mRNA-1	augustus_masked-scf300000870601.1-processed-gene-6.89-mRNA-1	augustus_masked-scf300000870603.0-processed-gene-15.47-mRNA-1	augustus_masked-scf300000870631.0-processed-gene-0.46-mRNA-1	augustus_masked-scf300000870673.2-processed-gene-6.41-mRNA-1	augustus_masked-scf300000870601.0-processed-gene-9.103-mRNA-1	augustus_masked-scf300000870662.0-processed-gene-11.101-mRNA-1	augustus_masked-scf300000870603.0-processed-gene-15.29-mRNA-1	augustus_masked-scf300000870603.0-processed-gene-1.20-mRNA-1	augustus_masked-scf300000870631.0-processed-gene-4.125-mRNA-1	augustus_masked-scf300000870629.0-processed-gene-3.70-mRNA-1
	augustus_masked-scf300000870673.2-processed-gene-5.95-mRNA-1	augustus_masked-scf300000870746.0-processed-gene-3.91-mRNA-1	augustus_masked-scf300000870701.0-processed-gene-0.8-mRNA-1	augustus_masked-scf300000870746.0-processed-gene-13.59-mRNA-1	augustus_masked-scf300000870603.0-processed-gene-16.25-mRNA-1	augustus_masked-scf300000870603.0-processed-gene-14.34-mRNA-1	augustus_masked-scf300000870605.0-processed-gene-0.192-mRNA-1	augustus_masked-scf300000870672.0-processed-gene-0.3-mRNA-1	augustus_masked-scf300000870601.0-processed-gene-17.113-mRNA-1	augustus_masked-scf300000870605.0-processed-gene-0.163-mRNA-1	augustus_masked-scf300000870601.0-processed-gene-19.204-mRNA-1	augustus_masked-scf300000870601.1-processed-gene-1.86-mRNA-1	augustus_masked-scf300000870651.1-processed-gene-3.104-mRNA-1	maker-scf300000870603.0-snap-gene-11.84-mRNA-1	augustus_masked-scf300000870603.0-processed-gene-1.27-mRNA-1	augustus_masked-scf300000870613.1-processed-gene-0.55-mRNA-1	augustus_masked-scf300000870631.0-processed-gene-2.98-mRNA-1	augustus_masked-scf300000870686.0-processed-gene-0.0-mRNA-1	augustus_masked-scf300000870601.1-processed-gene-5.89-mRNA-1	augustus_masked-scf300000870662.0-processed-gene-6.71-mRNA-1	augustus_masked-scf300000870603.0-processed-gene-16.25-mRNA-1	augustus_masked-scf300000870603.0-processed-gene-1.7-mRNA-1	augustus_masked-scf300000870641.0-processed-gene-2.167-mRNA-1	augustus_masked-scf300000870629.0-processed-gene-3.77-mRNA-1
	augustus_masked-scf300000870693.1-processed-gene-0.103-mRNA-1	augustus_masked-scf300000870749.0-processed-gene-17.105-mRNA-1	augustus_masked-scf300000870735.0-processed-gene-0.11-mRNA-1	augustus_masked-scf300000870746.0-processed-gene-3.107-mRNA-1	augustus_masked-scf300000870603.0-processed-gene-2.72-mRNA-1	augustus_masked-scf300000870603.0-processed-gene-6.101-mRNA-1	augustus_masked-scf300000870606.0-processed-gene-0.5-mRNA-1	augustus_masked-scf300000870672.0-processed-gene-0.4-mRNA-1	augustus_masked-scf300000870601.0-processed-gene-17.120-mRNA-1	augustus_masked-scf300000870605.0-processed-gene-0.192-mRNA-1	augustus_masked-scf300000870601.0-processed-gene-19.207-mRNA-1	augustus_masked-scf300000870601.1-processed-gene-1.98-mRNA-1	augustus_masked-scf300000870662.0-processed-gene-2.60-mRNA-1	maker-scf300000870603.0-snap-gene-13.56-mRNA-1	augustus_masked-scf300000870603.0-processed-gene-11.105-mRNA-1	augustus_masked-scf300000870619.1-processed-gene-0.1-mRNA-1	augustus_masked-scf300000870631.0-processed-gene-4.136-mRNA-1	augustus_masked-scf300000870733.0-processed-gene-0.1-mRNA-1	augustus_masked-scf300000870601.1-processed-gene-6.20-mRNA-1	augustus_masked-scf300000870662.0-processed-gene-6.98-mRNA-1	augustus_masked-scf300000870603.0-processed-gene-2.94-mRNA-1	augustus_masked-scf300000870603.0-processed-gene-9.12-mRNA-1	augustus_masked-scf300000870641.1-processed-gene-0.120-mRNA-1	augustus_masked-scf300000870629.0-processed-gene-4.13-mRNA-1
	augustus_masked-scf300000870733.0-processed-gene-0.1-mRNA-1	augustus_masked-scf300000870749.0-processed-gene-18.37-mRNA-1	augustus_masked-scf300000870735.0-processed-gene-13.89-mRNA-1	augustus_masked-scf300000870749.0-processed-gene-18.10-mRNA-1	augustus_masked-scf300000870603.0-processed-gene-3.21-mRNA-1	augustus_masked-scf300000870605.0-processed-gene-0.167-mRNA-1	augustus_masked-scf300000870611.0-processed-gene-0.25-mRNA-1	augustus_masked-scf300000870673.1-processed-gene-1.41-mRNA-1	augustus_masked-scf300000870601.0-processed-gene-19.204-mRNA-1	augustus_masked-scf300000870605.0-processed-gene-0.211-mRNA-1	augustus_masked-scf300000870601.0-processed-gene-6.99-mRNA-1	augustus_masked-scf300000870603.0-processed-gene-10.102-mRNA-1	augustus_masked-scf300000870673.2-processed-gene-12.53-mRNA-1	maker-scf300000870603.0-snap-gene-18.117-mRNA-1	augustus_masked-scf300000870603.0-processed-gene-12.35-mRNA-1	augustus_masked-scf300000870619.2-processed-gene-1.102-mRNA-1	augustus_masked-scf300000870635.0-processed-gene-0.16-mRNA-1	augustus_masked-scf300000870743.0-processed-gene-4.21-mRNA-1	augustus_masked-scf300000870601.1-processed-gene-6.89-mRNA-1	augustus_masked-scf300000870662.0-processed-gene-7.20-mRNA-1	augustus_masked-scf300000870603.0-processed-gene-9.12-mRNA-1	augustus_masked-scf300000870603.0-processed-gene-9.16-mRNA-1	augustus_masked-scf300000870641.1-processed-gene-0.137-mRNA-1	augustus_masked-scf300000870631.0-processed-gene-0.27-mRNA-1
	augustus_masked-scf300000870735.0-processed-gene-1.120-mRNA-1	augustus_masked-scf300000870749.0-processed-gene-4.125-mRNA-1	augustus_masked-scf300000870735.0-processed-gene-5.146-mRNA-1	augustus_masked-scf300000870753.0-processed-gene-6.87-mRNA-1	augustus_masked-scf300000870611.0-processed-gene-0.25-mRNA-1	augustus_masked-scf300000870605.0-processed-gene-0.226-mRNA-1	augustus_masked-scf300000870613.1-processed-gene-0.80-mRNA-1	augustus_masked-scf300000870673.1-processed-gene-1.78-mRNA-1	augustus_masked-scf300000870601.0-processed-gene-19.207-mRNA-1	augustus_masked-scf300000870607.0-processed-gene-1.111-mRNA-1	augustus_masked-scf300000870601.0-processed-gene-7.54-mRNA-1	augustus_masked-scf300000870603.0-processed-gene-12.35-mRNA-1	augustus_masked-scf300000870673.2-processed-gene-9.53-mRNA-1	maker-scf300000870603.0-snap-gene-7.3-mRNA-1	augustus_masked-scf300000870603.0-processed-gene-15.47-mRNA-1	augustus_masked-scf300000870619.2-processed-gene-4.46-mRNA-1	augustus_masked-scf300000870643.0-processed-gene-0.1-mRNA-1	augustus_masked-scf300000870744.0-processed-gene-2.24-mRNA-1	augustus_masked-scf300000870603.0-processed-gene-0.114-mRNA-1	augustus_masked-scf300000870673.2-processed-gene-11.99-mRNA-1	augustus_masked-scf300000870603.0-processed-gene-9.16-mRNA-1	augustus_masked-scf300000870619.2-processed-gene-2.119-mRNA-1	augustus_masked-scf300000870641.1-processed-gene-0.98-mRNA-1	augustus_masked-scf300000870631.0-processed-gene-1.120-mRNA-1
	augustus_masked-scf300000870735.0-processed-gene-9.107-mRNA-1	augustus_masked-scf300000870753.0-processed-gene-12.16-mRNA-1	augustus_masked-scf300000870744.0-processed-gene-1.56-mRNA-1	augustus_masked-scf300000870754.0-processed-gene-6.18-mRNA-1	augustus_masked-scf300000870626.0-processed-gene-0.13-mRNA-1	augustus_masked-scf300000870607.0-processed-gene-0.79-mRNA-1	augustus_masked-scf300000870626.0-processed-gene-0.13-mRNA-1	augustus_masked-scf300000870673.2-processed-gene-10.41-mRNA-1	augustus_masked-scf300000870601.0-processed-gene-19.209-mRNA-1	augustus_masked-scf300000870613.1-processed-gene-0.93-mRNA-1	augustus_masked-scf300000870601.1-processed-gene-6.89-mRNA-1	augustus_masked-scf300000870603.0-processed-gene-13.101-mRNA-1	augustus_masked-scf300000870693.1-processed-gene-4.123-mRNA-1	maker-scf300000870603.0-snap-gene-8.25-mRNA-1	augustus_masked-scf300000870603.0-processed-gene-16.44-mRNA-1	augustus_masked-scf300000870629.0-processed-gene-4.40-mRNA-1	augustus_masked-scf300000870651.0-processed-gene-0.70-mRNA-1	augustus_masked-scf300000870744.0-processed-gene-2.32-mRNA-1	augustus_masked-scf300000870603.0-processed-gene-10.64-mRNA-1	augustus_masked-scf300000870673.2-processed-gene-13.115-mRNA-1	augustus_masked-scf300000870603.0-processed-gene-9.46-mRNA-1	augustus_masked-scf300000870619.2-processed-gene-3.23-mRNA-1	augustus_masked-scf300000870642.0-processed-gene-0.66-mRNA-1	augustus_masked-scf300000870631.0-processed-gene-3.17-mRNA-1
	augustus_masked-scf300000870743.0-processed-gene-0.125-mRNA-1	augustus_masked-scf300000870753.0-processed-gene-14.113-mRNA-1	augustus_masked-scf300000870744.1-processed-gene-3.114-mRNA-1	maker-deg300000870423-snap-gene-0.53-mRNA-1	augustus_masked-scf300000870631.0-processed-gene-0.27-mRNA-1	augustus_masked-scf300000870613.1-processed-gene-0.55-mRNA-1	augustus_masked-scf300000870629.0-processed-gene-2.37-mRNA-1	augustus_masked-scf300000870673.2-processed-gene-14.134-mRNA-1	augustus_masked-scf300000870601.0-processed-gene-6.141-mRNA-1	augustus_masked-scf300000870641.0-processed-gene-1.156-mRNA-1	augustus_masked-scf300000870603.0-processed-gene-1.27-mRNA-1	augustus_masked-scf300000870603.0-processed-gene-16.16-mRNA-1	augustus_masked-scf300000870693.1-processed-gene-4.181-mRNA-1	maker-scf300000870603.0-snap-gene-8.34-mRNA-1	augustus_masked-scf300000870603.0-processed-gene-4.33-mRNA-1	augustus_masked-scf300000870651.1-processed-gene-4.105-mRNA-1	augustus_masked-scf300000870651.1-processed-gene-3.104-mRNA-1	augustus_masked-scf300000870744.1-processed-gene-5.211-mRNA-1	augustus_masked-scf300000870603.0-processed-gene-15.47-mRNA-1	augustus_masked-scf300000870673.2-processed-gene-6.41-mRNA-1	augustus_masked-scf300000870619.2-processed-gene-3.10-mRNA-1	augustus_masked-scf300000870619.2-processed-gene-3.48-mRNA-1	augustus_masked-scf300000870643.0-processed-gene-0.1-mRNA-1	augustus_masked-scf300000870631.0-processed-gene-4.125-mRNA-1
	augustus_masked-scf300000870743.0-processed-gene-1.100-mRNA-1	augustus_masked-scf300000870753.0-processed-gene-21.18-mRNA-1	augustus_masked-scf300000870744.1-processed-gene-5.153-mRNA-1	maker-deg300000870423-snap-gene-0.54-mRNA-1	augustus_masked-scf300000870631.0-processed-gene-1.126-mRNA-1	augustus_masked-scf300000870613.1-processed-gene-0.80-mRNA-1	augustus_masked-scf300000870629.0-processed-gene-4.34-mRNA-1	augustus_masked-scf300000870673.2-processed-gene-14.158-mRNA-1	augustus_masked-scf300000870601.0-processed-gene-6.99-mRNA-1	augustus_masked-scf300000870651.1-processed-gene-6.165-mRNA-1	augustus_masked-scf300000870603.0-processed-gene-12.27-mRNA-1	augustus_masked-scf300000870603.0-processed-gene-2.72-mRNA-1	augustus_masked-scf300000870735.0-processed-gene-11.80-mRNA-1	maker-scf300000870603.0-snap-gene-9.130-mRNA-1	augustus_masked-scf300000870603.0-processed-gene-6.105-mRNA-1	augustus_masked-scf300000870662.0-processed-gene-6.71-mRNA-1	augustus_masked-scf300000870662.0-processed-gene-2.60-mRNA-1	augustus_masked-scf300000870746.0-processed-gene-13.18-mRNA-1	augustus_masked-scf300000870603.0-processed-gene-18.217-mRNA-1	augustus_masked-scf300000870673.2-processed-gene-9.54-mRNA-1	augustus_masked-scf300000870619.2-processed-gene-3.23-mRNA-1	augustus_masked-scf300000870619.2-processed-gene-4.52-mRNA-1	augustus_masked-scf300000870645.0-processed-gene-0.76-mRNA-1	augustus_masked-scf300000870635.0-processed-gene-0.16-mRNA-1
	augustus_masked-scf300000870744.1-processed-gene-4.17-mRNA-1	augustus_masked-scf300000870754.0-processed-gene-0.27-mRNA-1	augustus_masked-scf300000870745.0-processed-gene-2.14-mRNA-1	maker-deg300000870423-snap-gene-0.8-mRNA-1	augustus_masked-scf300000870631.0-processed-gene-4.125-mRNA-1	augustus_masked-scf300000870619.0-processed-gene-0.43-mRNA-1	augustus_masked-scf300000870631.0-processed-gene-0.48-mRNA-1	augustus_masked-scf300000870673.2-processed-gene-15.215-mRNA-1	augustus_masked-scf300000870601.1-processed-gene-0.86-mRNA-1	augustus_masked-scf300000870662.0-processed-gene-5.26-mRNA-1	augustus_masked-scf300000870603.0-processed-gene-13.101-mRNA-1	augustus_masked-scf300000870603.0-processed-gene-3.21-mRNA-1	augustus_masked-scf300000870735.0-processed-gene-13.89-mRNA-1	maker-scf300000870603.1-snap-gene-0.72-mRNA-1	augustus_masked-scf300000870603.0-processed-gene-9.15-mRNA-1	augustus_masked-scf300000870662.0-processed-gene-6.98-mRNA-1	augustus_masked-scf300000870662.0-processed-gene-5.55-mRNA-1	augustus_masked-scf300000870746.0-processed-gene-3.107-mRNA-1	augustus_masked-scf300000870603.0-processed-gene-3.35-mRNA-1	augustus_masked-scf300000870693.1-processed-gene-3.122-mRNA-1	augustus_masked-scf300000870619.2-processed-gene-3.48-mRNA-1	augustus_masked-scf300000870619.2-processed-gene-4.66-mRNA-1	augustus_masked-scf300000870651.1-processed-gene-4.105-mRNA-1	augustus_masked-scf300000870641.0-processed-gene-2.147-mRNA-1
	augustus_masked-scf300000870745.0-processed-gene-2.14-mRNA-1	augustus_masked-scf300000870754.0-processed-gene-6.13-mRNA-1	augustus_masked-scf300000870746.0-processed-gene-13.25-mRNA-1	maker-deg300000870423-snap-gene-0.9-mRNA-1	augustus_masked-scf300000870641.0-processed-gene-2.155-mRNA-1	augustus_masked-scf300000870641.0-processed-gene-2.155-mRNA-1	augustus_masked-scf300000870635.0-processed-gene-0.15-mRNA-1	augustus_masked-scf300000870673.2-processed-gene-15.225-mRNA-1	augustus_masked-scf300000870601.1-processed-gene-1.86-mRNA-1	augustus_masked-scf300000870662.0-processed-gene-6.85-mRNA-1	augustus_masked-scf300000870603.0-processed-gene-3.21-mRNA-1	augustus_masked-scf300000870603.0-processed-gene-6.101-mRNA-1	augustus_masked-scf300000870735.0-processed-gene-14.241-mRNA-1	maker-scf300000870603.1-snap-gene-0.85-mRNA-1	augustus_masked-scf300000870603.0-processed-gene-9.46-mRNA-1	augustus_masked-scf300000870662.0-processed-gene-9.134-mRNA-1	augustus_masked-scf300000870673.1-processed-gene-1.41-mRNA-1	augustus_masked-scf300000870748.0-processed-gene-1.102-mRNA-1	augustus_masked-scf300000870603.0-processed-gene-4.33-mRNA-1	augustus_masked-scf300000870693.1-processed-gene-3.158-mRNA-1	augustus_masked-scf300000870619.2-processed-gene-4.52-mRNA-1	augustus_masked-scf300000870619.2-processed-gene-4.67-mRNA-1	augustus_masked-scf300000870651.1-processed-gene-5.56-mRNA-1	augustus_masked-scf300000870641.1-processed-gene-0.137-mRNA-1
	augustus_masked-scf300000870746.0-processed-gene-0.68-mRNA-1	augustus_masked-scf300000870754.0-processed-gene-9.76-mRNA-1	augustus_masked-scf300000870746.0-processed-gene-2.114-mRNA-1	maker-scf300000870586.0-snap-gene-1.66-mRNA-1	augustus_masked-scf300000870651.1-processed-gene-4.105-mRNA-1	augustus_masked-scf300000870641.1-processed-gene-0.137-mRNA-1	augustus_masked-scf300000870641.0-processed-gene-2.155-mRNA-1	augustus_masked-scf300000870673.2-processed-gene-6.22-mRNA-1	augustus_masked-scf300000870601.1-processed-gene-3.87-mRNA-1	augustus_masked-scf300000870662.0-processed-gene-6.98-mRNA-1	augustus_masked-scf300000870603.0-processed-gene-3.35-mRNA-1	augustus_masked-scf300000870605.0-processed-gene-0.167-mRNA-1	augustus_masked-scf300000870735.0-processed-gene-3.0-mRNA-1	maker-scf300000870607.0-snap-gene-0.1-mRNA-1	augustus_masked-scf300000870619.2-processed-gene-3.10-mRNA-1	augustus_masked-scf300000870673.1-processed-gene-0.71-mRNA-1	augustus_masked-scf300000870673.2-processed-gene-2.106-mRNA-1	augustus_masked-scf300000870749.0-processed-gene-18.72-mRNA-1	augustus_masked-scf300000870603.0-processed-gene-4.34-mRNA-1	augustus_masked-scf300000870733.0-processed-gene-0.1-mRNA-1	augustus_masked-scf300000870626.0-processed-gene-0.13-mRNA-1	augustus_masked-scf300000870626.0-processed-gene-0.13-mRNA-1	augustus_masked-scf300000870662.0-processed-gene-10.98-mRNA-1	augustus_masked-scf300000870641.1-processed-gene-0.98-mRNA-1
	augustus_masked-scf300000870746.0-processed-gene-0.72-mRNA-1	maker-deg300000870423-snap-gene-0.28-mRNA-1	augustus_masked-scf300000870749.0-processed-gene-10.93-mRNA-1	maker-scf300000870593.0-snap-gene-2.49-mRNA-1	augustus_masked-scf300000870651.1-processed-gene-6.165-mRNA-1	augustus_masked-scf300000870642.0-processed-gene-0.87-mRNA-1	augustus_masked-scf300000870641.0-processed-gene-2.167-mRNA-1	augustus_masked-scf300000870673.2-processed-gene-6.23-mRNA-1	augustus_masked-scf300000870603.0-processed-gene-10.102-mRNA-1	augustus_masked-scf300000870662.0-processed-gene-7.20-mRNA-1	augustus_masked-scf300000870603.0-processed-gene-4.33-mRNA-1	augustus_masked-scf300000870605.0-processed-gene-0.192-mRNA-1	augustus_masked-scf300000870735.0-processed-gene-6.94-mRNA-1	maker-scf300000870607.0-snap-gene-0.10-mRNA-1	augustus_masked-scf300000870619.2-processed-gene-3.23-mRNA-1	augustus_masked-scf300000870673.2-processed-gene-10.9-mRNA-1	augustus_masked-scf300000870673.2-processed-gene-5.107-mRNA-1	augustus_masked-scf300000870749.0-processed-gene-4.125-mRNA-1	augustus_masked-scf300000870603.0-processed-gene-6.105-mRNA-1	augustus_masked-scf300000870733.0-processed-gene-0.27-mRNA-1	augustus_masked-scf300000870629.0-processed-gene-4.13-mRNA-1	augustus_masked-scf300000870629.0-processed-gene-3.77-mRNA-1	augustus_masked-scf300000870662.0-processed-gene-5.37-mRNA-1	augustus_masked-scf300000870642.2-processed-gene-0.37-mRNA-1
	augustus_masked-scf300000870746.0-processed-gene-13.56-mRNA-1	maker-deg300000870423-snap-gene-0.30-mRNA-1	augustus_masked-scf300000870749.0-processed-gene-12.147-mRNA-1	maker-scf300000870593.0-snap-gene-6.75-mRNA-1	augustus_masked-scf300000870651.1-processed-gene-6.166-mRNA-1	augustus_masked-scf300000870651.0-processed-gene-0.82-mRNA-1	augustus_masked-scf300000870641.1-processed-gene-0.136-mRNA-1	augustus_masked-scf300000870673.2-processed-gene-9.18-mRNA-1	augustus_masked-scf300000870603.0-processed-gene-12.27-mRNA-1	augustus_masked-scf300000870673.2-processed-gene-10.9-mRNA-1	augustus_masked-scf300000870603.0-processed-gene-6.101-mRNA-1	augustus_masked-scf300000870605.0-processed-gene-0.212-mRNA-1	augustus_masked-scf300000870735.0-processed-gene-7.90-mRNA-1	maker-scf300000870619.2-snap-gene-2.1-mRNA-1	augustus_masked-scf300000870619.2-processed-gene-3.48-mRNA-1	augustus_masked-scf300000870673.2-processed-gene-11.99-mRNA-1	augustus_masked-scf300000870673.2-processed-gene-6.41-mRNA-1	augustus_masked-scf300000870752.0-processed-gene-0.14-mRNA-1	augustus_masked-scf300000870603.0-processed-gene-6.72-mRNA-1	augustus_masked-scf300000870735.0-processed-gene-1.107-mRNA-1	augustus_masked-scf300000870629.0-processed-gene-5.85-mRNA-1	augustus_masked-scf300000870629.0-processed-gene-4.13-mRNA-1	augustus_masked-scf300000870662.0-processed-gene-6.71-mRNA-1	augustus_masked-scf300000870651.0-processed-gene-0.70-mRNA-1
	augustus_masked-scf300000870746.0-processed-gene-5.42-mRNA-1	maker-deg300000870423-snap-gene-0.33-mRNA-1	augustus_masked-scf300000870749.0-processed-gene-15.42-mRNA-1	maker-scf300000870593.0-snap-gene-7.101-mRNA-1	augustus_masked-scf300000870651.1-processed-gene-6.198-mRNA-1	augustus_masked-scf300000870651.1-processed-gene-2.4-mRNA-1	augustus_masked-scf300000870641.1-processed-gene-0.137-mRNA-1	augustus_masked-scf300000870735.0-processed-gene-1.110-mRNA-1	augustus_masked-scf300000870603.0-processed-gene-12.35-mRNA-1	augustus_masked-scf300000870673.2-processed-gene-11.99-mRNA-1	augustus_masked-scf300000870603.0-processed-gene-6.105-mRNA-1	augustus_masked-scf300000870611.0-processed-gene-0.25-mRNA-1	augustus_masked-scf300000870744.0-processed-gene-1.37-mRNA-1	maker-scf300000870619.2-snap-gene-4.109-mRNA-1	augustus_masked-scf300000870619.2-processed-gene-4.52-mRNA-1	augustus_masked-scf300000870673.2-processed-gene-13.115-mRNA-1	augustus_masked-scf300000870673.2-processed-gene-8.22-mRNA-1	augustus_masked-scf300000870752.0-processed-gene-1.25-mRNA-1	augustus_masked-scf300000870603.0-processed-gene-9.15-mRNA-1	augustus_masked-scf300000870735.0-processed-gene-10.11-mRNA-1	augustus_masked-scf300000870631.0-processed-gene-0.27-mRNA-1	augustus_masked-scf300000870631.0-processed-gene-0.27-mRNA-1	augustus_masked-scf300000870662.0-processed-gene-8.62-mRNA-1	augustus_masked-scf300000870651.1-processed-gene-2.4-mRNA-1
	augustus_masked-scf300000870749.0-processed-gene-17.105-mRNA-1	maker-deg300000870423-snap-gene-0.34-mRNA-1	augustus_masked-scf300000870749.0-processed-gene-18.30-mRNA-1	maker-scf300000870593.0-snap-gene-7.103-mRNA-1	augustus_masked-scf300000870662.0-processed-gene-0.109-mRNA-1	augustus_masked-scf300000870651.1-processed-gene-3.128-mRNA-1	augustus_masked-scf300000870645.0-processed-gene-0.76-mRNA-1	augustus_masked-scf300000870735.0-processed-gene-13.124-mRNA-1	augustus_masked-scf300000870603.0-processed-gene-13.101-mRNA-1	augustus_masked-scf300000870693.1-processed-gene-3.165-mRNA-1	augustus_masked-scf300000870605.0-processed-gene-0.163-mRNA-1	augustus_masked-scf300000870611.0-processed-gene-0.36-mRNA-1	augustus_masked-scf300000870746.0-processed-gene-0.65-mRNA-1	maker-scf300000870629.0-augustus-gene-5.105-mRNA-1	augustus_masked-scf300000870619.2-processed-gene-4.55-mRNA-1	augustus_masked-scf300000870673.2-processed-gene-2.116-mRNA-1	augustus_masked-scf300000870693.1-processed-gene-4.181-mRNA-1	augustus_masked-scf300000870752.0-processed-gene-2.61-mRNA-1	augustus_masked-scf300000870603.0-processed-gene-9.40-mRNA-1	augustus_masked-scf300000870735.0-processed-gene-14.220-mRNA-1	augustus_masked-scf300000870631.0-processed-gene-0.48-mRNA-1	augustus_masked-scf300000870631.0-processed-gene-0.48-mRNA-1	augustus_masked-scf300000870662.0-processed-gene-8.81-mRNA-1	augustus_masked-scf300000870651.1-processed-gene-6.166-mRNA-1
	augustus_masked-scf300000870750.0-processed-gene-4.59-mRNA-1	maker-deg300000870423-snap-gene-0.51-mRNA-1	augustus_masked-scf300000870749.0-processed-gene-18.7-mRNA-1	maker-scf300000870593.0-snap-gene-7.119-mRNA-1	augustus_masked-scf300000870662.0-processed-gene-10.103-mRNA-1	augustus_masked-scf300000870651.1-processed-gene-6.166-mRNA-1	augustus_masked-scf300000870651.0-processed-gene-0.97-mRNA-1	augustus_masked-scf300000870735.0-processed-gene-5.133-mRNA-1	augustus_masked-scf300000870603.0-processed-gene-18.238-mRNA-1	augustus_masked-scf300000870733.0-processed-gene-0.65-mRNA-1	augustus_masked-scf300000870605.0-processed-gene-0.167-mRNA-1	augustus_masked-scf300000870613.1-processed-gene-0.93-mRNA-1	augustus_masked-scf300000870746.0-processed-gene-11.23-mRNA-1	maker-scf300000870629.0-snap-gene-1.65-mRNA-1	augustus_masked-scf300000870626.0-processed-gene-0.13-mRNA-1	augustus_masked-scf300000870673.2-processed-gene-8.32-mRNA-1	augustus_masked-scf300000870701.0-processed-gene-0.8-mRNA-1	augustus_masked-scf300000870752.0-processed-gene-5.104-mRNA-1	augustus_masked-scf300000870603.1-processed-gene-0.109-mRNA-1	augustus_masked-scf300000870735.0-processed-gene-8.48-mRNA-1	augustus_masked-scf300000870631.0-processed-gene-4.125-mRNA-1	augustus_masked-scf300000870631.0-processed-gene-2.98-mRNA-1	augustus_masked-scf300000870662.0-processed-gene-9.106-mRNA-1	augustus_masked-scf300000870662.0-processed-gene-5.37-mRNA-1
	augustus_masked-scf300000870752.0-processed-gene-2.99-mRNA-1	maker-deg300000870423-snap-gene-0.53-mRNA-1	augustus_masked-scf300000870749.0-processed-gene-3.107-mRNA-1	maker-scf300000870593.0-snap-gene-7.96-mRNA-1	augustus_masked-scf300000870662.0-processed-gene-11.113-mRNA-1	augustus_masked-scf300000870662.0-processed-gene-0.109-mRNA-1	augustus_masked-scf300000870651.1-processed-gene-4.127-mRNA-1	augustus_masked-scf300000870744.1-processed-gene-3.144-mRNA-1	augustus_masked-scf300000870603.0-processed-gene-3.21-mRNA-1	augustus_masked-scf300000870735.0-processed-gene-11.107-mRNA-1	augustus_masked-scf300000870605.0-processed-gene-0.192-mRNA-1	augustus_masked-scf300000870619.2-processed-gene-2.131-mRNA-1	augustus_masked-scf300000870746.0-processed-gene-12.36-mRNA-1	maker-scf300000870629.0-snap-gene-2.50-mRNA-1	augustus_masked-scf300000870629.0-processed-gene-2.41-mRNA-1	augustus_masked-scf300000870673.2-processed-gene-9.45-mRNA-1	augustus_masked-scf300000870735.0-processed-gene-5.146-mRNA-1	augustus_masked-scf300000870752.0-processed-gene-6.157-mRNA-1	augustus_masked-scf300000870605.0-processed-gene-0.167-mRNA-1	augustus_masked-scf300000870744.0-processed-gene-2.32-mRNA-1	augustus_masked-scf300000870631.0-processed-gene-5.69-mRNA-1	augustus_masked-scf300000870631.0-processed-gene-3.17-mRNA-1	augustus_masked-scf300000870662.0-processed-gene-9.134-mRNA-1	augustus_masked-scf300000870673.2-processed-gene-14.158-mRNA-1
	augustus_masked-scf300000870752.0-processed-gene-4.17-mRNA-1	maker-deg300000870423-snap-gene-0.54-mRNA-1	augustus_masked-scf300000870750.0-processed-gene-2.23-mRNA-1	maker-scf300000870595.0-snap-gene-1.57-mRNA-1	augustus_masked-scf300000870662.0-processed-gene-12.144-mRNA-1	augustus_masked-scf300000870662.0-processed-gene-10.107-mRNA-1	augustus_masked-scf300000870651.1-processed-gene-5.56-mRNA-1	augustus_masked-scf300000870744.1-processed-gene-5.177-mRNA-1	augustus_masked-scf300000870603.0-processed-gene-4.33-mRNA-1	augustus_masked-scf300000870735.0-processed-gene-13.89-mRNA-1	augustus_masked-scf300000870605.0-processed-gene-0.211-mRNA-1	augustus_masked-scf300000870631.0-processed-gene-2.87-mRNA-1	augustus_masked-scf300000870746.0-processed-gene-13.36-mRNA-1	maker-scf300000870631.0-augustus-gene-4.72-mRNA-1	augustus_masked-scf300000870629.0-processed-gene-3.122-mRNA-1	augustus_masked-scf300000870693.1-processed-gene-3.122-mRNA-1	augustus_masked-scf300000870735.0-processed-gene-7.90-mRNA-1	augustus_masked-scf300000870753.0-processed-gene-11.18-mRNA-1	augustus_masked-scf300000870605.0-processed-gene-0.211-mRNA-1	augustus_masked-scf300000870744.1-processed-gene-4.17-mRNA-1	augustus_masked-scf300000870641.0-processed-gene-1.127-mRNA-1	augustus_masked-scf300000870631.0-processed-gene-4.125-mRNA-1	augustus_masked-scf300000870673.1-processed-gene-0.71-mRNA-1	augustus_masked-scf300000870673.2-processed-gene-15.164-mRNA-1
	augustus_masked-scf300000870753.0-processed-gene-1.42-mRNA-1	maker-deg300000870423-snap-gene-0.59-mRNA-1	augustus_masked-scf300000870752.1-processed-gene-1.10-mRNA-1	maker-scf300000870595.0-snap-gene-3.58-mRNA-1	augustus_masked-scf300000870662.0-processed-gene-12.152-mRNA-1	augustus_masked-scf300000870662.0-processed-gene-2.39-mRNA-1	augustus_masked-scf300000870651.1-processed-gene-6.166-mRNA-1	augustus_masked-scf300000870746.0-processed-gene-0.68-mRNA-1	augustus_masked-scf300000870603.0-processed-gene-6.101-mRNA-1	augustus_masked-scf300000870735.0-processed-gene-14.225-mRNA-1	augustus_masked-scf300000870605.0-processed-gene-0.212-mRNA-1	augustus_masked-scf300000870642.2-processed-gene-0.30-mRNA-1	augustus_masked-scf300000870746.0-processed-gene-13.59-mRNA-1	maker-scf300000870631.0-snap-gene-5.108-mRNA-1	augustus_masked-scf300000870629.0-processed-gene-4.13-mRNA-1	augustus_masked-scf300000870733.0-processed-gene-0.27-mRNA-1	augustus_masked-scf300000870743.0-processed-gene-4.21-mRNA-1	augustus_masked-scf300000870753.0-processed-gene-18.116-mRNA-1	augustus_masked-scf300000870605.0-processed-gene-0.212-mRNA-1	augustus_masked-scf300000870745.0-processed-gene-3.194-mRNA-1	augustus_masked-scf300000870641.1-processed-gene-0.136-mRNA-1	augustus_masked-scf300000870631.0-processed-gene-5.62-mRNA-1	augustus_masked-scf300000870673.2-processed-gene-12.53-mRNA-1	augustus_masked-scf300000870673.2-processed-gene-2.106-mRNA-1
	augustus_masked-scf300000870753.0-processed-gene-12.16-mRNA-1	maker-deg300000870423-snap-gene-0.8-mRNA-1	augustus_masked-scf300000870753.0-processed-gene-15.15-mRNA-1	maker-scf300000870595.0-snap-gene-4.12-mRNA-1	augustus_masked-scf300000870662.0-processed-gene-4.44-mRNA-1	augustus_masked-scf300000870662.0-processed-gene-3.104-mRNA-1	augustus_masked-scf300000870662.0-processed-gene-0.109-mRNA-1	augustus_masked-scf300000870746.0-processed-gene-13.59-mRNA-1	augustus_masked-scf300000870603.0-processed-gene-6.72-mRNA-1	augustus_masked-scf300000870743.0-processed-gene-3.1-mRNA-1	augustus_masked-scf300000870611.0-processed-gene-0.36-mRNA-1	augustus_masked-scf300000870662.0-processed-gene-11.101-mRNA-1	augustus_masked-scf300000870746.0-processed-gene-7.119-mRNA-1	maker-scf300000870641.0-snap-gene-1.37-mRNA-1	augustus_masked-scf300000870629.0-processed-gene-4.40-mRNA-1	augustus_masked-scf300000870735.0-processed-gene-1.120-mRNA-1	augustus_masked-scf300000870745.0-processed-gene-1.111-mRNA-1	augustus_masked-scf300000870753.0-processed-gene-26.59-mRNA-1	augustus_masked-scf300000870613.1-processed-gene-0.109-mRNA-1	augustus_masked-scf300000870746.0-processed-gene-13.18-mRNA-1	augustus_masked-scf300000870641.1-processed-gene-0.98-mRNA-1	augustus_masked-scf300000870635.0-processed-gene-0.16-mRNA-1	augustus_masked-scf300000870673.2-processed-gene-13.115-mRNA-1	augustus_masked-scf300000870673.2-processed-gene-3.49-mRNA-1
	augustus_masked-scf300000870753.0-processed-gene-26.73-mRNA-1	maker-deg300000870423-snap-gene-0.9-mRNA-1	augustus_masked-scf300000870753.0-processed-gene-26.59-mRNA-1	maker-scf300000870595.0-snap-gene-4.32-mRNA-1	augustus_masked-scf300000870662.0-processed-gene-5.26-mRNA-1	augustus_masked-scf300000870672.0-processed-gene-0.4-mRNA-1	augustus_masked-scf300000870662.0-processed-gene-10.103-mRNA-1	augustus_masked-scf300000870746.0-processed-gene-13.60-mRNA-1	augustus_masked-scf300000870605.0-processed-gene-0.167-mRNA-1	augustus_masked-scf300000870743.0-processed-gene-5.122-mRNA-1	augustus_masked-scf300000870613.1-processed-gene-0.58-mRNA-1	augustus_masked-scf300000870662.0-processed-gene-11.113-mRNA-1	augustus_masked-scf300000870748.0-processed-gene-1.102-mRNA-1	maker-scf300000870651.1-snap-gene-0.61-mRNA-1	augustus_masked-scf300000870629.0-processed-gene-4.43-mRNA-1	augustus_masked-scf300000870735.0-processed-gene-10.37-mRNA-1	augustus_masked-scf300000870746.0-processed-gene-13.18-mRNA-1	augustus_masked-scf300000870753.0-processed-gene-3.103-mRNA-1	augustus_masked-scf300000870619.2-processed-gene-3.23-mRNA-1	augustus_masked-scf300000870746.0-processed-gene-7.111-mRNA-1	augustus_masked-scf300000870642.0-processed-gene-0.66-mRNA-1	augustus_masked-scf300000870641.1-processed-gene-0.137-mRNA-1	augustus_masked-scf300000870673.2-processed-gene-15.229-mRNA-1	augustus_masked-scf300000870693.1-processed-gene-0.103-mRNA-1
	augustus_masked-scf300000870753.0-processed-gene-4.142-mRNA-1	maker-scf300000870586.0-snap-gene-0.56-mRNA-1	augustus_masked-scf300000870753.0-processed-gene-4.142-mRNA-1	maker-scf300000870595.0-snap-gene-4.6-mRNA-1	augustus_masked-scf300000870662.0-processed-gene-9.134-mRNA-1	augustus_masked-scf300000870673.2-processed-gene-14.158-mRNA-1	augustus_masked-scf300000870662.0-processed-gene-10.98-mRNA-1	augustus_masked-scf300000870746.0-processed-gene-6.55-mRNA-1	augustus_masked-scf300000870605.0-processed-gene-0.192-mRNA-1	augustus_masked-scf300000870744.0-processed-gene-1.53-mRNA-1	augustus_masked-scf300000870613.1-processed-gene-0.66-mRNA-1	augustus_masked-scf300000870662.0-processed-gene-6.85-mRNA-1	augustus_masked-scf300000870748.0-processed-gene-1.107-mRNA-1	maker-scf300000870651.1-snap-gene-2.72-mRNA-1	augustus_masked-scf300000870629.0-processed-gene-5.85-mRNA-1	augustus_masked-scf300000870735.0-processed-gene-13.102-mRNA-1	augustus_masked-scf300000870746.0-processed-gene-2.113-mRNA-1	augustus_masked-scf300000870753.0-processed-gene-9.23-mRNA-1	augustus_masked-scf300000870619.2-processed-gene-3.6-mRNA-1	augustus_masked-scf300000870747.0-processed-gene-0.89-mRNA-1	augustus_masked-scf300000870642.2-processed-gene-0.23-mRNA-1	augustus_masked-scf300000870641.1-processed-gene-0.98-mRNA-1	augustus_masked-scf300000870673.2-processed-gene-5.81-mRNA-1	augustus_masked-scf300000870693.1-processed-gene-3.122-mRNA-1
	maker-scf300000870586.0-snap-gene-0.64-mRNA-1	maker-scf300000870586.0-snap-gene-0.63-mRNA-1	augustus_masked-scf300000870753.0-processed-gene-5.11-mRNA-1	maker-scf300000870595.0-snap-gene-6.224-mRNA-1	augustus_masked-scf300000870672.0-processed-gene-0.3-mRNA-1	augustus_masked-scf300000870673.2-processed-gene-2.115-mRNA-1	augustus_masked-scf300000870662.0-processed-gene-12.144-mRNA-1	augustus_masked-scf300000870746.0-processed-gene-7.119-mRNA-1	augustus_masked-scf300000870605.0-processed-gene-0.211-mRNA-1	augustus_masked-scf300000870744.0-processed-gene-2.24-mRNA-1	augustus_masked-scf300000870613.1-processed-gene-0.93-mRNA-1	augustus_masked-scf300000870673.2-processed-gene-11.99-mRNA-1	augustus_masked-scf300000870749.0-processed-gene-11.156-mRNA-1	maker-scf300000870651.1-snap-gene-2.79-mRNA-1	augustus_masked-scf300000870629.0-processed-gene-6.114-mRNA-1	augustus_masked-scf300000870735.0-processed-gene-2.18-mRNA-1	augustus_masked-scf300000870748.0-processed-gene-2.135-mRNA-1	augustus_masked-scf300000870754.0-processed-gene-5.46-mRNA-1	augustus_masked-scf300000870619.2-processed-gene-4.32-mRNA-1	augustus_masked-scf300000870748.0-processed-gene-1.102-mRNA-1	augustus_masked-scf300000870643.0-processed-gene-0.1-mRNA-1	augustus_masked-scf300000870643.0-processed-gene-0.1-mRNA-1	augustus_masked-scf300000870673.2-processed-gene-6.51-mRNA-1	augustus_masked-scf300000870693.1-processed-gene-4.123-mRNA-1
	maker-scf300000870586.0-snap-gene-3.60-mRNA-1	maker-scf300000870586.0-snap-gene-2.61-mRNA-1	maker-deg300000870423-snap-gene-0.1-mRNA-1	maker-scf300000870595.1-snap-gene-0.100-mRNA-1	augustus_masked-scf300000870672.0-processed-gene-0.4-mRNA-1	augustus_masked-scf300000870673.2-processed-gene-2.116-mRNA-1	augustus_masked-scf300000870662.0-processed-gene-6.85-mRNA-1	augustus_masked-scf300000870748.0-processed-gene-1.98-mRNA-1	augustus_masked-scf300000870605.0-processed-gene-0.212-mRNA-1	augustus_masked-scf300000870744.0-processed-gene-2.32-mRNA-1	augustus_masked-scf300000870619.2-processed-gene-2.105-mRNA-1	augustus_masked-scf300000870673.2-processed-gene-2.115-mRNA-1	augustus_masked-scf300000870749.0-processed-gene-18.16-mRNA-1	maker-scf300000870651.1-snap-gene-5.140-mRNA-1	augustus_masked-scf300000870629.0-processed-gene-6.166-mRNA-1	augustus_masked-scf300000870735.0-processed-gene-4.20-mRNA-1	augustus_masked-scf300000870749.0-processed-gene-0.35-mRNA-1	augustus_masked-scf300000870754.0-processed-gene-5.64-mRNA-1	augustus_masked-scf300000870619.2-processed-gene-4.52-mRNA-1	augustus_masked-scf300000870749.0-processed-gene-18.72-mRNA-1	augustus_masked-scf300000870651.1-processed-gene-5.40-mRNA-1	augustus_masked-scf300000870651.0-processed-gene-0.60-mRNA-1	augustus_masked-scf300000870673.2-processed-gene-9.47-mRNA-1	augustus_masked-scf300000870735.0-processed-gene-13.124-mRNA-1
	maker-scf300000870586.0-snap-gene-4.115-mRNA-1	maker-scf300000870586.0-snap-gene-3.60-mRNA-1	maker-deg300000870423-snap-gene-0.12-mRNA-1	maker-scf300000870595.1-snap-gene-2.139-mRNA-1	augustus_masked-scf300000870673.2-processed-gene-11.89-mRNA-1	augustus_masked-scf300000870673.2-processed-gene-8.32-mRNA-1	augustus_masked-scf300000870662.0-processed-gene-7.34-mRNA-1	augustus_masked-scf300000870748.0-processed-gene-2.124-mRNA-1	augustus_masked-scf300000870613.1-processed-gene-0.66-mRNA-1	augustus_masked-scf300000870744.1-processed-gene-5.211-mRNA-1	augustus_masked-scf300000870619.2-processed-gene-3.6-mRNA-1	augustus_masked-scf300000870673.2-processed-gene-8.32-mRNA-1	augustus_masked-scf300000870749.0-processed-gene-4.125-mRNA-1	maker-scf300000870651.1-snap-gene-6.125-mRNA-1	augustus_masked-scf300000870631.0-processed-gene-0.27-mRNA-1	augustus_masked-scf300000870743.0-processed-gene-2.125-mRNA-1	augustus_masked-scf300000870749.0-processed-gene-1.49-mRNA-1	augustus_masked-scf300000870754.0-processed-gene-6.18-mRNA-1	augustus_masked-scf300000870619.2-processed-gene-4.55-mRNA-1	augustus_masked-scf300000870749.0-processed-gene-4.125-mRNA-1	augustus_masked-scf300000870662.0-processed-gene-4.44-mRNA-1	augustus_masked-scf300000870651.1-processed-gene-2.4-mRNA-1	augustus_masked-scf300000870693.1-processed-gene-0.103-mRNA-1	augustus_masked-scf300000870735.0-processed-gene-4.73-mRNA-1
	maker-scf300000870586.0-snap-gene-4.116-mRNA-1	maker-scf300000870586.0-snap-gene-3.82-mRNA-1	maker-deg300000870423-snap-gene-0.15-mRNA-1	maker-scf300000870599.0-snap-gene-0.84-mRNA-1	augustus_masked-scf300000870673.2-processed-gene-14.134-mRNA-1	augustus_masked-scf300000870693.1-processed-gene-0.83-mRNA-1	augustus_masked-scf300000870662.0-processed-gene-8.81-mRNA-1	augustus_masked-scf300000870749.0-processed-gene-15.42-mRNA-1	augustus_masked-scf300000870631.0-processed-gene-2.87-mRNA-1	augustus_masked-scf300000870745.0-processed-gene-2.14-mRNA-1	augustus_masked-scf300000870629.0-processed-gene-4.22-mRNA-1	augustus_masked-scf300000870693.1-processed-gene-0.83-mRNA-1	augustus_masked-scf300000870750.0-processed-gene-2.27-mRNA-1	maker-scf300000870662.0-snap-gene-3.55-mRNA-1	augustus_masked-scf300000870631.0-processed-gene-1.126-mRNA-1	augustus_masked-scf300000870743.0-processed-gene-5.122-mRNA-1	augustus_masked-scf300000870749.0-processed-gene-15.13-mRNA-1	augustus_masked-scf300000870754.0-processed-gene-6.28-mRNA-1	augustus_masked-scf300000870619.2-processed-gene-4.66-mRNA-1	augustus_masked-scf300000870749.1-processed-gene-0.103-mRNA-1	augustus_masked-scf300000870662.0-processed-gene-5.37-mRNA-1	augustus_masked-scf300000870651.1-processed-gene-3.104-mRNA-1	augustus_masked-scf300000870735.0-processed-gene-0.13-mRNA-1	augustus_masked-scf300000870743.0-processed-gene-4.21-mRNA-1
	maker-scf300000870586.0-snap-gene-4.141-mRNA-1	maker-scf300000870586.0-snap-gene-4.111-mRNA-1	maker-deg300000870423-snap-gene-0.16-mRNA-1	maker-scf300000870599.0-snap-gene-1.171-mRNA-1	augustus_masked-scf300000870673.2-processed-gene-4.32-mRNA-1	augustus_masked-scf300000870733.0-processed-gene-0.27-mRNA-1	augustus_masked-scf300000870662.0-processed-gene-9.106-mRNA-1	augustus_masked-scf300000870749.0-processed-gene-16.127-mRNA-1	augustus_masked-scf300000870642.2-processed-gene-0.30-mRNA-1	augustus_masked-scf300000870746.0-processed-gene-0.72-mRNA-1	augustus_masked-scf300000870629.0-processed-gene-5.85-mRNA-1	augustus_masked-scf300000870733.0-processed-gene-0.65-mRNA-1	augustus_masked-scf300000870750.0-processed-gene-2.48-mRNA-1	maker-scf300000870662.0-snap-gene-6.16-mRNA-1	augustus_masked-scf300000870631.0-processed-gene-3.17-mRNA-1	augustus_masked-scf300000870744.1-processed-gene-5.186-mRNA-1	augustus_masked-scf300000870749.0-processed-gene-18.72-mRNA-1	maker-deg300000870423-snap-gene-0.36-mRNA-1	augustus_masked-scf300000870629.0-processed-gene-0.25-mRNA-1	augustus_masked-scf300000870752.0-processed-gene-0.12-mRNA-1	augustus_masked-scf300000870662.0-processed-gene-8.62-mRNA-1	augustus_masked-scf300000870662.0-processed-gene-2.60-mRNA-1	augustus_masked-scf300000870735.0-processed-gene-14.220-mRNA-1	augustus_masked-scf300000870746.0-processed-gene-0.68-mRNA-1
	maker-scf300000870593.0-snap-gene-0.109-mRNA-1	maker-scf300000870586.0-snap-gene-4.119-mRNA-1	maker-deg300000870423-snap-gene-0.17-mRNA-1	maker-scf300000870601.0-snap-gene-10.121-mRNA-1	augustus_masked-scf300000870673.2-processed-gene-5.95-mRNA-1	augustus_masked-scf300000870735.0-processed-gene-1.120-mRNA-1	augustus_masked-scf300000870672.0-processed-gene-0.3-mRNA-1	augustus_masked-scf300000870749.0-processed-gene-18.10-mRNA-1	augustus_masked-scf300000870651.0-processed-gene-0.82-mRNA-1	augustus_masked-scf300000870748.0-processed-gene-1.102-mRNA-1	augustus_masked-scf300000870631.0-processed-gene-2.87-mRNA-1	augustus_masked-scf300000870735.0-processed-gene-10.16-mRNA-1	augustus_masked-scf300000870750.0-processed-gene-3.0-mRNA-1	maker-scf300000870662.0-snap-gene-8.2-mRNA-1	augustus_masked-scf300000870631.0-processed-gene-4.125-mRNA-1	augustus_masked-scf300000870746.0-processed-gene-1.143-mRNA-1	augustus_masked-scf300000870749.0-processed-gene-4.125-mRNA-1	maker-deg300000870423-snap-gene-0.4-mRNA-1	augustus_masked-scf300000870629.0-processed-gene-2.41-mRNA-1	augustus_masked-scf300000870752.0-processed-gene-0.44-mRNA-1	augustus_masked-scf300000870673.1-processed-gene-1.78-mRNA-1	augustus_masked-scf300000870662.0-processed-gene-5.55-mRNA-1	augustus_masked-scf300000870735.0-processed-gene-6.93-mRNA-1	augustus_masked-scf300000870746.0-processed-gene-0.79-mRNA-1
	maker-scf300000870593.0-snap-gene-1.115-mRNA-1	maker-scf300000870586.0-snap-gene-4.120-mRNA-1	maker-deg300000870423-snap-gene-0.18-mRNA-1	maker-scf300000870601.0-snap-gene-13.17-mRNA-1	augustus_masked-scf300000870673.2-processed-gene-9.18-mRNA-1	augustus_masked-scf300000870735.0-processed-gene-10.37-mRNA-1	augustus_masked-scf300000870672.0-processed-gene-0.4-mRNA-1	augustus_masked-scf300000870749.0-processed-gene-18.30-mRNA-1	augustus_masked-scf300000870651.1-processed-gene-3.117-mRNA-1	augustus_masked-scf300000870748.0-processed-gene-2.122-mRNA-1	augustus_masked-scf300000870642.2-processed-gene-0.41-mRNA-1	augustus_masked-scf300000870735.0-processed-gene-11.107-mRNA-1	augustus_masked-scf300000870752.0-processed-gene-0.14-mRNA-1	maker-scf300000870662.0-snap-gene-8.3-mRNA-1	augustus_masked-scf300000870641.0-processed-gene-2.147-mRNA-1	augustus_masked-scf300000870746.0-processed-gene-13.56-mRNA-1	augustus_masked-scf300000870752.0-processed-gene-0.14-mRNA-1	maker-deg300000870423-snap-gene-0.8-mRNA-1	augustus_masked-scf300000870629.0-processed-gene-3.122-mRNA-1	augustus_masked-scf300000870752.0-processed-gene-0.47-mRNA-1	augustus_masked-scf300000870673.2-processed-gene-11.89-mRNA-1	augustus_masked-scf300000870673.1-processed-gene-1.78-mRNA-1	augustus_masked-scf300000870735.0-processed-gene-7.111-mRNA-1	augustus_masked-scf300000870746.0-processed-gene-11.23-mRNA-1
	maker-scf300000870593.0-snap-gene-2.49-mRNA-1	maker-scf300000870586.0-snap-gene-4.145-mRNA-1	maker-deg300000870423-snap-gene-0.19-mRNA-1	maker-scf300000870601.0-snap-gene-13.18-mRNA-1	augustus_masked-scf300000870693.1-processed-gene-0.103-mRNA-1	augustus_masked-scf300000870735.0-processed-gene-13.102-mRNA-1	augustus_masked-scf300000870673.1-processed-gene-1.41-mRNA-1	augustus_masked-scf300000870749.0-processed-gene-18.63-mRNA-1	augustus_masked-scf300000870651.1-processed-gene-4.101-mRNA-1	augustus_masked-scf300000870749.0-processed-gene-10.93-mRNA-1	augustus_masked-scf300000870651.0-processed-gene-0.70-mRNA-1	augustus_masked-scf300000870735.0-processed-gene-13.89-mRNA-1	augustus_masked-scf300000870752.0-processed-gene-1.25-mRNA-1	maker-scf300000870673.0-snap-gene-0.77-mRNA-1	augustus_masked-scf300000870641.0-processed-gene-2.207-mRNA-1	augustus_masked-scf300000870747.0-processed-gene-0.89-mRNA-1	augustus_masked-scf300000870752.0-processed-gene-0.35-mRNA-1	maker-scf300000870586.0-snap-gene-1.66-mRNA-1	augustus_masked-scf300000870629.0-processed-gene-3.92-mRNA-1	augustus_masked-scf300000870752.0-processed-gene-4.11-mRNA-1	augustus_masked-scf300000870693.1-processed-gene-0.103-mRNA-1	augustus_masked-scf300000870693.1-processed-gene-0.103-mRNA-1	augustus_masked-scf300000870735.0-processed-gene-8.48-mRNA-1	augustus_masked-scf300000870746.0-processed-gene-13.56-mRNA-1
	maker-scf300000870593.0-snap-gene-4.66-mRNA-1	maker-scf300000870593.0-snap-gene-5.121-mRNA-1	maker-deg300000870423-snap-gene-0.20-mRNA-1	maker-scf300000870601.0-snap-gene-14.78-mRNA-1	augustus_masked-scf300000870693.1-processed-gene-3.122-mRNA-1	augustus_masked-scf300000870735.0-processed-gene-13.89-mRNA-1	augustus_masked-scf300000870673.2-processed-gene-11.89-mRNA-1	augustus_masked-scf300000870750.0-processed-gene-2.23-mRNA-1	augustus_masked-scf300000870651.1-processed-gene-4.126-mRNA-1	augustus_masked-scf300000870749.0-processed-gene-11.137-mRNA-1	augustus_masked-scf300000870651.1-processed-gene-4.126-mRNA-1	augustus_masked-scf300000870743.0-processed-gene-3.1-mRNA-1	augustus_masked-scf300000870752.0-processed-gene-4.8-mRNA-1	maker-scf300000870673.1-snap-gene-1.189-mRNA-1	augustus_masked-scf300000870642.0-processed-gene-0.60-mRNA-1	augustus_masked-scf300000870748.0-processed-gene-4.41-mRNA-1	augustus_masked-scf300000870752.0-processed-gene-5.104-mRNA-1	maker-scf300000870586.0-snap-gene-1.67-mRNA-1	augustus_masked-scf300000870629.0-processed-gene-4.40-mRNA-1	augustus_masked-scf300000870753.0-processed-gene-0.35-mRNA-1	augustus_masked-scf300000870693.1-processed-gene-3.122-mRNA-1	augustus_masked-scf300000870693.1-processed-gene-4.123-mRNA-1	augustus_masked-scf300000870743.0-processed-gene-2.137-mRNA-1	augustus_masked-scf300000870746.0-processed-gene-13.59-mRNA-1
	maker-scf300000870593.0-snap-gene-4.73-mRNA-1	maker-scf300000870593.0-snap-gene-5.135-mRNA-1	maker-deg300000870423-snap-gene-0.22-mRNA-1	maker-scf300000870601.0-snap-gene-15.101-mRNA-1	augustus_masked-scf300000870693.1-processed-gene-3.157-mRNA-1	augustus_masked-scf300000870735.0-processed-gene-2.18-mRNA-1	augustus_masked-scf300000870673.2-processed-gene-12.53-mRNA-1	augustus_masked-scf300000870750.0-processed-gene-3.35-mRNA-1	augustus_masked-scf300000870662.0-processed-gene-2.39-mRNA-1	augustus_masked-scf300000870749.0-processed-gene-17.105-mRNA-1	augustus_masked-scf300000870662.0-processed-gene-0.88-mRNA-1	augustus_masked-scf300000870744.0-processed-gene-1.53-mRNA-1	augustus_masked-scf300000870753.0-processed-gene-11.18-mRNA-1	maker-scf300000870673.1-snap-gene-1.215-mRNA-1	augustus_masked-scf300000870642.2-processed-gene-0.23-mRNA-1	augustus_masked-scf300000870749.0-processed-gene-11.120-mRNA-1	augustus_masked-scf300000870753.0-processed-gene-10.83-mRNA-1	maker-scf300000870586.0-snap-gene-1.72-mRNA-1	augustus_masked-scf300000870629.0-processed-gene-5.85-mRNA-1	augustus_masked-scf300000870753.0-processed-gene-18.116-mRNA-1	augustus_masked-scf300000870693.1-processed-gene-4.123-mRNA-1	augustus_masked-scf300000870693.1-processed-gene-4.181-mRNA-1	augustus_masked-scf300000870743.0-processed-gene-3.34-mRNA-1	augustus_masked-scf300000870746.0-processed-gene-3.107-mRNA-1
	maker-scf300000870593.0-snap-gene-5.115-mRNA-1	maker-scf300000870593.0-snap-gene-6.62-mRNA-1	maker-deg300000870423-snap-gene-0.29-mRNA-1	maker-scf300000870601.0-snap-gene-17.78-mRNA-1	augustus_masked-scf300000870735.0-processed-gene-0.13-mRNA-1	augustus_masked-scf300000870735.0-processed-gene-6.111-mRNA-1	augustus_masked-scf300000870673.2-processed-gene-14.134-mRNA-1	augustus_masked-scf300000870750.0-processed-gene-4.59-mRNA-1	augustus_masked-scf300000870662.0-processed-gene-2.50-mRNA-1	augustus_masked-scf300000870749.0-processed-gene-18.37-mRNA-1	augustus_masked-scf300000870662.0-processed-gene-2.39-mRNA-1	augustus_masked-scf300000870744.0-processed-gene-2.24-mRNA-1	augustus_masked-scf300000870753.0-processed-gene-11.58-mRNA-1	maker-scf300000870673.2-snap-gene-15.122-mRNA-1	augustus_masked-scf300000870651.0-processed-gene-0.60-mRNA-1	augustus_masked-scf300000870749.0-processed-gene-2.123-mRNA-1	augustus_masked-scf300000870753.0-processed-gene-11.18-mRNA-1	maker-scf300000870586.0-snap-gene-2.67-mRNA-1	augustus_masked-scf300000870631.0-processed-gene-1.120-mRNA-1	augustus_masked-scf300000870753.0-processed-gene-21.18-mRNA-1	augustus_masked-scf300000870693.1-processed-gene-4.181-mRNA-1	augustus_masked-scf300000870735.0-processed-gene-11.115-mRNA-1	augustus_masked-scf300000870744.0-processed-gene-1.56-mRNA-1	augustus_masked-scf300000870746.0-processed-gene-6.55-mRNA-1
	maker-scf300000870593.0-snap-gene-5.120-mRNA-1	maker-scf300000870595.0-augustus-gene-2.143-mRNA-1	maker-deg300000870423-snap-gene-0.31-mRNA-1	maker-scf300000870601.0-snap-gene-4.14-mRNA-1	augustus_masked-scf300000870735.0-processed-gene-10.11-mRNA-1	augustus_masked-scf300000870743.0-processed-gene-2.125-mRNA-1	augustus_masked-scf300000870673.2-processed-gene-14.158-mRNA-1	augustus_masked-scf300000870752.0-processed-gene-2.59-mRNA-1	augustus_masked-scf300000870662.0-processed-gene-3.104-mRNA-1	augustus_masked-scf300000870749.0-processed-gene-3.92-mRNA-1	augustus_masked-scf300000870662.0-processed-gene-2.50-mRNA-1	augustus_masked-scf300000870744.0-processed-gene-2.32-mRNA-1	augustus_masked-scf300000870754.0-processed-gene-5.46-mRNA-1	maker-scf300000870673.2-snap-gene-2.18-mRNA-1	augustus_masked-scf300000870651.1-processed-gene-5.34-mRNA-1	augustus_masked-scf300000870749.1-processed-gene-0.54-mRNA-1	augustus_masked-scf300000870753.0-processed-gene-11.47-mRNA-1	maker-scf300000870586.0-snap-gene-4.136-mRNA-1	augustus_masked-scf300000870631.0-processed-gene-4.113-mRNA-1	augustus_masked-scf300000870753.0-processed-gene-3.86-mRNA-1	augustus_masked-scf300000870735.0-processed-gene-13.124-mRNA-1	augustus_masked-scf300000870735.0-processed-gene-13.124-mRNA-1	augustus_masked-scf300000870744.1-processed-gene-5.153-mRNA-1	augustus_masked-scf300000870746.0-processed-gene-9.55-mRNA-1
	maker-scf300000870593.0-snap-gene-5.122-mRNA-1	maker-scf300000870595.0-snap-gene-2.88-mRNA-1	maker-deg300000870423-snap-gene-0.56-mRNA-1	maker-scf300000870601.0-snap-gene-4.27-mRNA-1	augustus_masked-scf300000870735.0-processed-gene-11.107-mRNA-1	augustus_masked-scf300000870744.1-processed-gene-3.144-mRNA-1	augustus_masked-scf300000870673.2-processed-gene-15.215-mRNA-1	augustus_masked-scf300000870752.1-processed-gene-1.13-mRNA-1	augustus_masked-scf300000870662.0-processed-gene-5.26-mRNA-1	augustus_masked-scf300000870749.0-processed-gene-4.125-mRNA-1	augustus_masked-scf300000870662.0-processed-gene-5.26-mRNA-1	augustus_masked-scf300000870744.1-processed-gene-4.12-mRNA-1	augustus_masked-scf300000870754.0-processed-gene-5.64-mRNA-1	maker-scf300000870673.2-snap-gene-7.54-mRNA-1	augustus_masked-scf300000870651.1-processed-gene-5.40-mRNA-1	augustus_masked-scf300000870749.1-processed-gene-0.77-mRNA-1	augustus_masked-scf300000870753.0-processed-gene-11.58-mRNA-1	maker-scf300000870593.0-snap-gene-6.70-mRNA-1	augustus_masked-scf300000870635.0-processed-gene-0.16-mRNA-1	augustus_masked-scf300000870754.0-processed-gene-5.68-mRNA-1	augustus_masked-scf300000870735.0-processed-gene-14.220-mRNA-1	augustus_masked-scf300000870735.0-processed-gene-14.241-mRNA-1	augustus_masked-scf300000870746.0-processed-gene-1.123-mRNA-1	augustus_masked-scf300000870748.0-processed-gene-1.107-mRNA-1
	maker-scf300000870593.0-snap-gene-7.121-mRNA-1	maker-scf300000870595.0-snap-gene-4.24-mRNA-1	maker-deg300000870423-snap-gene-0.8-mRNA-1	maker-scf300000870601.0-snap-gene-4.29-mRNA-1	augustus_masked-scf300000870735.0-processed-gene-13.105-mRNA-1	augustus_masked-scf300000870745.0-processed-gene-2.14-mRNA-1	augustus_masked-scf300000870673.2-processed-gene-2.115-mRNA-1	augustus_masked-scf300000870753.0-processed-gene-14.110-mRNA-1	augustus_masked-scf300000870672.0-processed-gene-0.4-mRNA-1	augustus_masked-scf300000870749.1-processed-gene-0.42-mRNA-1	augustus_masked-scf300000870673.2-processed-gene-0.96-mRNA-1	augustus_masked-scf300000870745.0-processed-gene-2.14-mRNA-1	augustus_masked-scf300000870754.0-processed-gene-5.68-mRNA-1	maker-scf300000870673.2-snap-gene-7.55-mRNA-1	augustus_masked-scf300000870662.0-processed-gene-11.113-mRNA-1	augustus_masked-scf300000870750.0-processed-gene-1.111-mRNA-1	augustus_masked-scf300000870753.0-processed-gene-24.119-mRNA-1	maker-scf300000870593.0-snap-gene-7.101-mRNA-1	augustus_masked-scf300000870641.0-processed-gene-2.147-mRNA-1	augustus_masked-scf300000870754.0-processed-gene-6.13-mRNA-1	augustus_masked-scf300000870735.0-processed-gene-4.63-mRNA-1	augustus_masked-scf300000870735.0-processed-gene-3.0-mRNA-1	augustus_masked-scf300000870746.0-processed-gene-11.53-mRNA-1	augustus_masked-scf300000870748.0-processed-gene-1.129-mRNA-1
	maker-scf300000870593.0-snap-gene-7.90-mRNA-1	maker-scf300000870595.0-snap-gene-5.56-mRNA-1	maker-scf300000870586.0-snap-gene-0.64-mRNA-1	maker-scf300000870601.0-snap-gene-5.86-mRNA-1	augustus_masked-scf300000870735.0-processed-gene-3.22-mRNA-1	augustus_masked-scf300000870745.0-processed-gene-3.191-mRNA-1	augustus_masked-scf300000870673.2-processed-gene-5.81-mRNA-1	augustus_masked-scf300000870753.0-processed-gene-15.15-mRNA-1	augustus_masked-scf300000870673.1-processed-gene-0.71-mRNA-1	augustus_masked-scf300000870752.0-processed-gene-0.44-mRNA-1	augustus_masked-scf300000870673.2-processed-gene-6.41-mRNA-1	augustus_masked-scf300000870746.0-processed-gene-12.36-mRNA-1	augustus_masked-scf300000870754.0-processed-gene-6.0-mRNA-1	maker-scf300000870673.2-snap-gene-7.60-mRNA-1	augustus_masked-scf300000870662.0-processed-gene-4.44-mRNA-1	augustus_masked-scf300000870752.0-processed-gene-0.12-mRNA-1	augustus_masked-scf300000870753.0-processed-gene-8.55-mRNA-1	maker-scf300000870595.0-augustus-gene-5.1-mRNA-1	augustus_masked-scf300000870642.0-processed-gene-0.60-mRNA-1	maker-deg300000870423-snap-gene-0.27-mRNA-1	augustus_masked-scf300000870735.0-processed-gene-5.105-mRNA-1	augustus_masked-scf300000870744.0-processed-gene-1.56-mRNA-1	augustus_masked-scf300000870746.0-processed-gene-12.20-mRNA-1	augustus_masked-scf300000870749.1-processed-gene-0.54-mRNA-1
	maker-scf300000870595.0-augustus-gene-2.148-mRNA-1	maker-scf300000870595.0-snap-gene-6.224-mRNA-1	maker-scf300000870586.0-snap-gene-0.75-mRNA-1	maker-scf300000870601.0-snap-gene-5.92-mRNA-1	augustus_masked-scf300000870735.0-processed-gene-4.63-mRNA-1	augustus_masked-scf300000870746.0-processed-gene-0.68-mRNA-1	augustus_masked-scf300000870673.2-processed-gene-6.22-mRNA-1	augustus_masked-scf300000870753.0-processed-gene-18.114-mRNA-1	augustus_masked-scf300000870673.2-processed-gene-10.9-mRNA-1	augustus_masked-scf300000870752.0-processed-gene-6.193-mRNA-1	augustus_masked-scf300000870681.0-processed-gene-0.28-mRNA-1	augustus_masked-scf300000870746.0-processed-gene-13.36-mRNA-1	augustus_masked-scf300000870754.0-processed-gene-6.13-mRNA-1	maker-scf300000870673.2-snap-gene-9.120-mRNA-1	augustus_masked-scf300000870662.0-processed-gene-5.26-mRNA-1	augustus_masked-scf300000870752.0-processed-gene-0.44-mRNA-1	augustus_masked-scf300000870753.0-processed-gene-9.23-mRNA-1	maker-scf300000870595.0-snap-gene-1.46-mRNA-1	augustus_masked-scf300000870642.0-processed-gene-0.87-mRNA-1	maker-deg300000870423-snap-gene-0.28-mRNA-1	augustus_masked-scf300000870735.0-processed-gene-5.131-mRNA-1	augustus_masked-scf300000870744.1-processed-gene-3.114-mRNA-1	augustus_masked-scf300000870746.0-processed-gene-13.59-mRNA-1	augustus_masked-scf300000870750.0-processed-gene-2.36-mRNA-1
	maker-scf300000870595.0-snap-gene-0.7-mRNA-1	maker-scf300000870595.0-snap-gene-6.237-mRNA-1	maker-scf300000870586.0-snap-gene-3.80-mRNA-1	maker-scf300000870601.0-snap-gene-6.67-mRNA-1	augustus_masked-scf300000870735.0-processed-gene-5.131-mRNA-1	augustus_masked-scf300000870746.0-processed-gene-1.143-mRNA-1	augustus_masked-scf300000870673.2-processed-gene-6.51-mRNA-1	augustus_masked-scf300000870753.0-processed-gene-22.9-mRNA-1	augustus_masked-scf300000870673.2-processed-gene-2.115-mRNA-1	augustus_masked-scf300000870753.0-processed-gene-0.35-mRNA-1	augustus_masked-scf300000870693.1-processed-gene-0.83-mRNA-1	augustus_masked-scf300000870748.0-processed-gene-1.102-mRNA-1	augustus_masked-scf300000870754.0-processed-gene-6.27-mRNA-1	maker-scf300000870693.1-snap-gene-1.118-mRNA-1	augustus_masked-scf300000870662.0-processed-gene-6.71-mRNA-1	augustus_masked-scf300000870752.0-processed-gene-4.11-mRNA-1	augustus_masked-scf300000870754.0-processed-gene-0.1-mRNA-1	maker-scf300000870595.0-snap-gene-1.57-mRNA-1	augustus_masked-scf300000870651.0-processed-gene-0.60-mRNA-1	maker-deg300000870423-snap-gene-0.30-mRNA-1	augustus_masked-scf300000870735.0-processed-gene-7.111-mRNA-1	augustus_masked-scf300000870746.0-processed-gene-11.23-mRNA-1	augustus_masked-scf300000870746.0-processed-gene-3.111-mRNA-1	augustus_masked-scf300000870750.0-processed-gene-4.59-mRNA-1
	maker-scf300000870595.0-snap-gene-0.9-mRNA-1	maker-scf300000870595.0-snap-gene-6.243-mRNA-1	maker-scf300000870586.0-snap-gene-4.108-mRNA-1	maker-scf300000870601.0-snap-gene-6.68-mRNA-1	augustus_masked-scf300000870735.0-processed-gene-6.111-mRNA-1	augustus_masked-scf300000870746.0-processed-gene-11.17-mRNA-1	augustus_masked-scf300000870673.2-processed-gene-9.18-mRNA-1	augustus_masked-scf300000870753.0-processed-gene-23.39-mRNA-1	augustus_masked-scf300000870673.2-processed-gene-2.116-mRNA-1	augustus_masked-scf300000870753.0-processed-gene-1.42-mRNA-1	augustus_masked-scf300000870693.1-processed-gene-2.25-mRNA-1	augustus_masked-scf300000870748.0-processed-gene-2.122-mRNA-1	augustus_masked-scf300000870754.0-processed-gene-6.3-mRNA-1	maker-scf300000870693.1-snap-gene-3.30-mRNA-1	augustus_masked-scf300000870662.0-processed-gene-6.98-mRNA-1	augustus_masked-scf300000870752.0-processed-gene-6.178-mRNA-1	augustus_masked-scf300000870754.0-processed-gene-11.119-mRNA-1	maker-scf300000870595.0-snap-gene-3.54-mRNA-1	augustus_masked-scf300000870651.0-processed-gene-0.70-mRNA-1	maker-deg300000870423-snap-gene-0.33-mRNA-1	augustus_masked-scf300000870743.0-processed-gene-2.137-mRNA-1	augustus_masked-scf300000870746.0-processed-gene-13.59-mRNA-1	augustus_masked-scf300000870748.0-processed-gene-1.107-mRNA-1	augustus_masked-scf300000870752.0-processed-gene-0.12-mRNA-1
	maker-scf300000870595.0-snap-gene-6.214-mRNA-1	maker-scf300000870595.1-snap-gene-1.126-mRNA-1	maker-scf300000870586.0-snap-gene-4.119-mRNA-1	maker-scf300000870601.0-snap-gene-8.124-mRNA-1	augustus_masked-scf300000870735.0-processed-gene-8.48-mRNA-1	augustus_masked-scf300000870746.0-processed-gene-3.91-mRNA-1	augustus_masked-scf300000870693.1-processed-gene-2.9-mRNA-1	augustus_masked-scf300000870753.0-processed-gene-25.157-mRNA-1	augustus_masked-scf300000870673.2-processed-gene-3.21-mRNA-1	augustus_masked-scf300000870753.0-processed-gene-16.129-mRNA-1	augustus_masked-scf300000870693.1-processed-gene-3.156-mRNA-1	augustus_masked-scf300000870749.0-processed-gene-10.93-mRNA-1	augustus_masked-scf300000870754.0-processed-gene-8.118-mRNA-1	maker-scf300000870730.0-snap-gene-0.35-mRNA-1	augustus_masked-scf300000870673.2-processed-gene-11.126-mRNA-1	augustus_masked-scf300000870753.0-processed-gene-11.1-mRNA-1	augustus_masked-scf300000870754.0-processed-gene-5.46-mRNA-1	maker-scf300000870595.0-snap-gene-3.63-mRNA-1	augustus_masked-scf300000870651.0-processed-gene-0.91-mRNA-1	maker-deg300000870423-snap-gene-0.34-mRNA-1	augustus_masked-scf300000870743.0-processed-gene-4.17-mRNA-1	augustus_masked-scf300000870746.0-processed-gene-3.107-mRNA-1	augustus_masked-scf300000870749.0-processed-gene-10.93-mRNA-1	augustus_masked-scf300000870752.0-processed-gene-0.14-mRNA-1
	maker-scf300000870595.0-snap-gene-6.221-mRNA-1	maker-scf300000870595.1-snap-gene-2.151-mRNA-1	maker-scf300000870593.0-snap-gene-0.105-mRNA-1	maker-scf300000870601.0-snap-gene-8.127-mRNA-1	augustus_masked-scf300000870743.0-processed-gene-1.100-mRNA-1	augustus_masked-scf300000870746.0-processed-gene-8.126-mRNA-1	augustus_masked-scf300000870735.0-processed-gene-0.11-mRNA-1	augustus_masked-scf300000870753.0-processed-gene-4.122-mRNA-1	augustus_masked-scf300000870673.2-processed-gene-6.22-mRNA-1	augustus_masked-scf300000870753.0-processed-gene-18.116-mRNA-1	augustus_masked-scf300000870693.1-processed-gene-4.149-mRNA-1	augustus_masked-scf300000870749.0-processed-gene-14.31-mRNA-1	augustus_masked-scf300000870754.0-processed-gene-8.76-mRNA-1	maker-scf300000870735.0-augustus-gene-12.139-mRNA-1	augustus_masked-scf300000870673.2-processed-gene-11.99-mRNA-1	augustus_masked-scf300000870753.0-processed-gene-18.116-mRNA-1	augustus_masked-scf300000870754.0-processed-gene-5.64-mRNA-1	maker-scf300000870595.0-snap-gene-3.72-mRNA-1	augustus_masked-scf300000870651.1-processed-gene-3.104-mRNA-1	maker-deg300000870423-snap-gene-0.5-mRNA-1	augustus_masked-scf300000870744.0-processed-gene-1.56-mRNA-1	augustus_masked-scf300000870746.0-processed-gene-3.111-mRNA-1	augustus_masked-scf300000870749.0-processed-gene-18.7-mRNA-1	augustus_masked-scf300000870752.0-processed-gene-5.104-mRNA-1
	maker-scf300000870595.0-snap-gene-6.230-mRNA-1	maker-scf300000870599.0-snap-gene-0.78-mRNA-1	maker-scf300000870593.0-snap-gene-1.109-mRNA-1	maker-scf300000870601.0-snap-gene-8.138-mRNA-1	augustus_masked-scf300000870743.0-processed-gene-2.137-mRNA-1	augustus_masked-scf300000870748.0-processed-gene-4.20-mRNA-1	augustus_masked-scf300000870735.0-processed-gene-0.13-mRNA-1	augustus_masked-scf300000870753.0-processed-gene-5.11-mRNA-1	augustus_masked-scf300000870673.2-processed-gene-6.41-mRNA-1	augustus_masked-scf300000870753.0-processed-gene-21.49-mRNA-1	augustus_masked-scf300000870717.0-processed-gene-0.0-mRNA-1	augustus_masked-scf300000870749.0-processed-gene-17.105-mRNA-1	augustus_masked-scf300000870754.0-processed-gene-8.93-mRNA-1	maker-scf300000870735.0-snap-gene-0.99-mRNA-1	augustus_masked-scf300000870673.2-processed-gene-6.41-mRNA-1	augustus_masked-scf300000870753.0-processed-gene-24.115-mRNA-1	augustus_masked-scf300000870754.0-processed-gene-5.68-mRNA-1	maker-scf300000870595.0-snap-gene-6.224-mRNA-1	augustus_masked-scf300000870651.1-processed-gene-5.34-mRNA-1	maker-deg300000870423-snap-gene-0.59-mRNA-1	augustus_masked-scf300000870744.1-processed-gene-1.17-mRNA-1	augustus_masked-scf300000870746.0-processed-gene-6.43-mRNA-1	augustus_masked-scf300000870749.0-processed-gene-3.107-mRNA-1	augustus_masked-scf300000870752.0-processed-gene-6.157-mRNA-1
	maker-scf300000870595.0-snap-gene-6.232-mRNA-1	maker-scf300000870599.0-snap-gene-0.84-mRNA-1	maker-scf300000870593.0-snap-gene-2.49-mRNA-1	maker-scf300000870601.1-snap-gene-0.67-mRNA-1	augustus_masked-scf300000870743.0-processed-gene-3.1-mRNA-1	augustus_masked-scf300000870748.0-processed-gene-4.41-mRNA-1	augustus_masked-scf300000870735.0-processed-gene-10.11-mRNA-1	augustus_masked-scf300000870753.0-processed-gene-6.99-mRNA-1	augustus_masked-scf300000870673.2-processed-gene-8.32-mRNA-1	augustus_masked-scf300000870753.0-processed-gene-26.31-mRNA-1	augustus_masked-scf300000870733.0-processed-gene-0.65-mRNA-1	augustus_masked-scf300000870749.0-processed-gene-18.37-mRNA-1	maker-deg300000870423-augustus-gene-0.153-mRNA-1	maker-scf300000870735.0-snap-gene-10.78-mRNA-1	augustus_masked-scf300000870681.0-processed-gene-0.28-mRNA-1	augustus_masked-scf300000870753.0-processed-gene-3.86-mRNA-1	augustus_masked-scf300000870754.0-processed-gene-6.0-mRNA-1	maker-scf300000870595.1-augustus-gene-0.46-mRNA-1	augustus_masked-scf300000870662.0-processed-gene-2.39-mRNA-1	maker-deg300000870423-snap-gene-0.8-mRNA-1	augustus_masked-scf300000870744.1-processed-gene-5.186-mRNA-1	augustus_masked-scf300000870746.0-processed-gene-6.55-mRNA-1	augustus_masked-scf300000870749.0-processed-gene-7.107-mRNA-1	augustus_masked-scf300000870753.0-processed-gene-1.49-mRNA-1
	maker-scf300000870595.1-snap-gene-2.115-mRNA-1	maker-scf300000870599.0-snap-gene-0.89-mRNA-1	maker-scf300000870593.0-snap-gene-2.56-mRNA-1	maker-scf300000870601.1-snap-gene-1.57-mRNA-1	augustus_masked-scf300000870743.0-processed-gene-4.17-mRNA-1	augustus_masked-scf300000870749.0-processed-gene-11.120-mRNA-1	augustus_masked-scf300000870735.0-processed-gene-10.16-mRNA-1	augustus_masked-scf300000870753.0-processed-gene-7.27-mRNA-1	augustus_masked-scf300000870693.1-processed-gene-0.83-mRNA-1	augustus_masked-scf300000870753.0-processed-gene-3.103-mRNA-1	augustus_masked-scf300000870735.0-processed-gene-10.37-mRNA-1	augustus_masked-scf300000870749.0-processed-gene-3.92-mRNA-1	maker-deg300000870423-snap-gene-0.28-mRNA-1	maker-scf300000870735.0-snap-gene-12.83-mRNA-1	augustus_masked-scf300000870693.1-processed-gene-0.103-mRNA-1	augustus_masked-scf300000870754.0-processed-gene-11.119-mRNA-1	augustus_masked-scf300000870754.0-processed-gene-6.18-mRNA-1	maker-scf300000870599.0-snap-gene-0.85-mRNA-1	augustus_masked-scf300000870662.0-processed-gene-2.60-mRNA-1	maker-scf300000870586.0-snap-gene-0.63-mRNA-1	augustus_masked-scf300000870746.0-processed-gene-11.23-mRNA-1	augustus_masked-scf300000870746.0-processed-gene-9.55-mRNA-1	augustus_masked-scf300000870749.1-processed-gene-0.77-mRNA-1	augustus_masked-scf300000870753.0-processed-gene-11.58-mRNA-1
	maker-scf300000870599.0-snap-gene-0.77-mRNA-1	maker-scf300000870599.0-snap-gene-1.156-mRNA-1	maker-scf300000870593.0-snap-gene-4.64-mRNA-1	maker-scf300000870601.1-snap-gene-2.46-mRNA-1	augustus_masked-scf300000870743.0-processed-gene-5.139-mRNA-1	augustus_masked-scf300000870749.0-processed-gene-11.137-mRNA-1	augustus_masked-scf300000870735.0-processed-gene-10.8-mRNA-1	augustus_masked-scf300000870754.0-processed-gene-1.146-mRNA-1	augustus_masked-scf300000870693.1-processed-gene-3.156-mRNA-1	augustus_masked-scf300000870753.0-processed-gene-7.27-mRNA-1	augustus_masked-scf300000870735.0-processed-gene-13.89-mRNA-1	augustus_masked-scf300000870749.0-processed-gene-4.125-mRNA-1	maker-deg300000870423-snap-gene-0.30-mRNA-1	maker-scf300000870735.0-snap-gene-4.79-mRNA-1	augustus_masked-scf300000870693.1-processed-gene-3.122-mRNA-1	augustus_masked-scf300000870754.0-processed-gene-5.68-mRNA-1	augustus_masked-scf300000870754.0-processed-gene-6.27-mRNA-1	maker-scf300000870601.0-snap-gene-10.121-mRNA-1	augustus_masked-scf300000870662.0-processed-gene-5.26-mRNA-1	maker-scf300000870586.0-snap-gene-2.67-mRNA-1	augustus_masked-scf300000870746.0-processed-gene-13.56-mRNA-1	augustus_masked-scf300000870748.0-processed-gene-1.107-mRNA-1	augustus_masked-scf300000870750.0-processed-gene-2.48-mRNA-1	augustus_masked-scf300000870753.0-processed-gene-16.123-mRNA-1
	maker-scf300000870599.0-snap-gene-1.145-mRNA-1	maker-scf300000870601.0-snap-gene-1.72-mRNA-1	maker-scf300000870593.0-snap-gene-4.73-mRNA-1	maker-scf300000870601.1-snap-gene-3.54-mRNA-1	augustus_masked-scf300000870744.0-processed-gene-1.53-mRNA-1	augustus_masked-scf300000870749.0-processed-gene-15.42-mRNA-1	augustus_masked-scf300000870735.0-processed-gene-13.89-mRNA-1	augustus_masked-scf300000870754.0-processed-gene-10.103-mRNA-1	augustus_masked-scf300000870733.0-processed-gene-0.38-mRNA-1	augustus_masked-scf300000870754.0-processed-gene-6.13-mRNA-1	augustus_masked-scf300000870735.0-processed-gene-14.225-mRNA-1	augustus_masked-scf300000870749.0-processed-gene-9.28-mRNA-1	maker-deg300000870423-snap-gene-0.36-mRNA-1	maker-scf300000870735.0-snap-gene-8.114-mRNA-1	augustus_masked-scf300000870693.1-processed-gene-3.158-mRNA-1	maker-scf300000870586.0-snap-gene-2.67-mRNA-1	augustus_masked-scf300000870754.0-processed-gene-6.28-mRNA-1	maker-scf300000870601.0-snap-gene-11.31-mRNA-1	augustus_masked-scf300000870662.0-processed-gene-6.71-mRNA-1	maker-scf300000870586.0-snap-gene-3.60-mRNA-1	augustus_masked-scf300000870746.0-processed-gene-13.59-mRNA-1	augustus_masked-scf300000870749.0-processed-gene-0.35-mRNA-1	augustus_masked-scf300000870752.0-processed-gene-5.104-mRNA-1	augustus_masked-scf300000870753.0-processed-gene-4.122-mRNA-1
	maker-scf300000870599.0-snap-gene-1.166-mRNA-1	maker-scf300000870601.0-snap-gene-10.102-mRNA-1	maker-scf300000870593.0-snap-gene-4.82-mRNA-1	maker-scf300000870601.1-snap-gene-3.57-mRNA-1	augustus_masked-scf300000870744.1-processed-gene-1.17-mRNA-1	augustus_masked-scf300000870749.0-processed-gene-15.6-mRNA-1	augustus_masked-scf300000870735.0-processed-gene-5.133-mRNA-1	augustus_masked-scf300000870754.0-processed-gene-12.45-mRNA-1	augustus_masked-scf300000870735.0-processed-gene-1.120-mRNA-1	augustus_masked-scf300000870754.0-processed-gene-6.30-mRNA-1	augustus_masked-scf300000870735.0-processed-gene-9.97-mRNA-1	augustus_masked-scf300000870749.1-processed-gene-0.42-mRNA-1	maker-deg300000870423-snap-gene-0.4-mRNA-1	maker-scf300000870743.0-snap-gene-3.116-mRNA-1	augustus_masked-scf300000870693.1-processed-gene-4.123-mRNA-1	maker-scf300000870586.0-snap-gene-3.61-mRNA-1	augustus_masked-scf300000870754.0-processed-gene-6.3-mRNA-1	maker-scf300000870601.0-snap-gene-12.67-mRNA-1	augustus_masked-scf300000870662.0-processed-gene-6.98-mRNA-1	maker-scf300000870586.0-snap-gene-4.114-mRNA-1	augustus_masked-scf300000870746.0-processed-gene-3.107-mRNA-1	augustus_masked-scf300000870749.0-processed-gene-14.27-mRNA-1	augustus_masked-scf300000870752.0-processed-gene-6.178-mRNA-1	augustus_masked-scf300000870753.0-processed-gene-4.142-mRNA-1
	maker-scf300000870601.0-augustus-gene-5.38-mRNA-1	maker-scf300000870601.0-snap-gene-10.104-mRNA-1	maker-scf300000870593.0-snap-gene-4.87-mRNA-1	maker-scf300000870601.1-snap-gene-3.67-mRNA-1	augustus_masked-scf300000870744.1-processed-gene-2.15-mRNA-1	augustus_masked-scf300000870749.0-processed-gene-16.121-mRNA-1	augustus_masked-scf300000870735.0-processed-gene-6.93-mRNA-1	maker-deg300000870423-snap-gene-0.50-mRNA-1	augustus_masked-scf300000870735.0-processed-gene-10.37-mRNA-1	maker-deg300000870423-snap-gene-0.2-mRNA-1	augustus_masked-scf300000870743.0-processed-gene-0.125-mRNA-1	augustus_masked-scf300000870750.0-processed-gene-3.0-mRNA-1	maker-deg300000870423-snap-gene-0.59-mRNA-1	maker-scf300000870744.0-snap-gene-0.49-mRNA-1	augustus_masked-scf300000870693.1-processed-gene-4.149-mRNA-1	maker-scf300000870586.0-snap-gene-3.79-mRNA-1	augustus_masked-scf300000870754.0-processed-gene-8.118-mRNA-1	maker-scf300000870601.0-snap-gene-12.87-mRNA-1	augustus_masked-scf300000870673.1-processed-gene-1.75-mRNA-1	maker-scf300000870586.0-snap-gene-4.115-mRNA-1	augustus_masked-scf300000870746.0-processed-gene-3.111-mRNA-1	augustus_masked-scf300000870749.0-processed-gene-18.16-mRNA-1	augustus_masked-scf300000870753.0-processed-gene-1.2-mRNA-1	augustus_masked-scf300000870754.0-processed-gene-1.146-mRNA-1
	maker-scf300000870601.0-snap-gene-1.68-mRNA-1	maker-scf300000870601.0-snap-gene-10.116-mRNA-1	maker-scf300000870593.0-snap-gene-4.88-mRNA-1	maker-scf300000870602.0-snap-gene-0.0-mRNA-1	augustus_masked-scf300000870744.1-processed-gene-3.144-mRNA-1	augustus_masked-scf300000870749.0-processed-gene-16.127-mRNA-1	augustus_masked-scf300000870735.0-processed-gene-7.111-mRNA-1	maker-deg300000870423-snap-gene-0.52-mRNA-1	augustus_masked-scf300000870735.0-processed-gene-11.107-mRNA-1	maker-deg300000870423-snap-gene-0.30-mRNA-1	augustus_masked-scf300000870744.0-processed-gene-1.53-mRNA-1	augustus_masked-scf300000870752.0-processed-gene-0.44-mRNA-1	maker-deg300000870423-snap-gene-0.9-mRNA-1	maker-scf300000870744.0-snap-gene-0.60-mRNA-1	augustus_masked-scf300000870693.1-processed-gene-4.181-mRNA-1	maker-scf300000870586.0-snap-gene-4.114-mRNA-1	augustus_masked-scf300000870754.0-processed-gene-8.76-mRNA-1	maker-scf300000870601.0-snap-gene-19.10-mRNA-1	augustus_masked-scf300000870673.2-processed-gene-0.96-mRNA-1	maker-scf300000870586.0-snap-gene-4.136-mRNA-1	augustus_masked-scf300000870746.0-processed-gene-5.45-mRNA-1	augustus_masked-scf300000870749.0-processed-gene-4.144-mRNA-1	augustus_masked-scf300000870753.0-processed-gene-11.58-mRNA-1	augustus_masked-scf300000870754.0-processed-gene-1.147-mRNA-1
	maker-scf300000870601.0-snap-gene-10.102-mRNA-1	maker-scf300000870601.0-snap-gene-12.70-mRNA-1	maker-scf300000870595.0-augustus-gene-4.121-mRNA-1	maker-scf300000870603.0-augustus-gene-8.73-mRNA-1	augustus_masked-scf300000870744.1-processed-gene-4.12-mRNA-1	augustus_masked-scf300000870749.0-processed-gene-17.100-mRNA-1	augustus_masked-scf300000870735.0-processed-gene-8.48-mRNA-1	maker-scf300000870586.0-snap-gene-0.59-mRNA-1	augustus_masked-scf300000870735.0-processed-gene-13.102-mRNA-1	maker-deg300000870423-snap-gene-0.33-mRNA-1	augustus_masked-scf300000870744.1-processed-gene-5.211-mRNA-1	augustus_masked-scf300000870752.0-processed-gene-1.34-mRNA-1	maker-scf300000870586.0-snap-gene-0.59-mRNA-1	maker-scf300000870744.0-snap-gene-2.104-mRNA-1	augustus_masked-scf300000870735.0-processed-gene-11.115-mRNA-1	maker-scf300000870586.0-snap-gene-4.136-mRNA-1	maker-deg300000870423-augustus-gene-0.153-mRNA-1	maker-scf300000870601.0-snap-gene-2.110-mRNA-1	augustus_masked-scf300000870673.2-processed-gene-15.164-mRNA-1	maker-scf300000870593.0-snap-gene-3.68-mRNA-1	augustus_masked-scf300000870746.0-processed-gene-6.43-mRNA-1	augustus_masked-scf300000870749.1-processed-gene-0.96-mRNA-1	augustus_masked-scf300000870753.0-processed-gene-3.86-mRNA-1	augustus_masked-scf300000870754.0-processed-gene-11.119-mRNA-1
	maker-scf300000870601.0-snap-gene-10.113-mRNA-1	maker-scf300000870601.0-snap-gene-14.73-mRNA-1	maker-scf300000870595.0-snap-gene-0.12-mRNA-1	maker-scf300000870603.0-snap-gene-12.153-mRNA-1	augustus_masked-scf300000870744.1-processed-gene-5.153-mRNA-1	augustus_masked-scf300000870749.0-processed-gene-17.105-mRNA-1	augustus_masked-scf300000870743.0-processed-gene-2.137-mRNA-1	maker-scf300000870586.0-snap-gene-1.63-mRNA-1	augustus_masked-scf300000870735.0-processed-gene-13.89-mRNA-1	maker-deg300000870423-snap-gene-0.34-mRNA-1	augustus_masked-scf300000870745.0-processed-gene-1.111-mRNA-1	augustus_masked-scf300000870752.0-processed-gene-3.95-mRNA-1	maker-scf300000870586.0-snap-gene-1.72-mRNA-1	maker-scf300000870744.1-snap-gene-2.59-mRNA-1	augustus_masked-scf300000870735.0-processed-gene-14.225-mRNA-1	maker-scf300000870586.0-snap-gene-4.141-mRNA-1	maker-deg300000870423-snap-gene-0.12-mRNA-1	maker-scf300000870601.0-snap-gene-3.66-mRNA-1	augustus_masked-scf300000870673.2-processed-gene-2.106-mRNA-1	maker-scf300000870593.0-snap-gene-4.55-mRNA-1	augustus_masked-scf300000870748.0-processed-gene-1.107-mRNA-1	augustus_masked-scf300000870750.0-processed-gene-3.32-mRNA-1	augustus_masked-scf300000870753.0-processed-gene-4.142-mRNA-1	augustus_masked-scf300000870754.0-processed-gene-5.64-mRNA-1
	maker-scf300000870601.0-snap-gene-11.18-mRNA-1	maker-scf300000870601.0-snap-gene-14.78-mRNA-1	maker-scf300000870595.0-snap-gene-0.4-mRNA-1	maker-scf300000870603.0-snap-gene-13.59-mRNA-1	augustus_masked-scf300000870746.0-processed-gene-0.68-mRNA-1	augustus_masked-scf300000870749.0-processed-gene-18.30-mRNA-1	augustus_masked-scf300000870743.0-processed-gene-3.1-mRNA-1	maker-scf300000870586.0-snap-gene-3.76-mRNA-1	augustus_masked-scf300000870735.0-processed-gene-14.178-mRNA-1	maker-deg300000870423-snap-gene-0.50-mRNA-1	augustus_masked-scf300000870745.0-processed-gene-2.14-mRNA-1	augustus_masked-scf300000870753.0-processed-gene-0.11-mRNA-1	maker-scf300000870586.0-snap-gene-2.63-mRNA-1	maker-scf300000870744.1-snap-gene-5.18-mRNA-1	augustus_masked-scf300000870735.0-processed-gene-3.0-mRNA-1	maker-scf300000870593.0-snap-gene-3.54-mRNA-1	maker-deg300000870423-snap-gene-0.36-mRNA-1	maker-scf300000870601.0-snap-gene-4.28-mRNA-1	augustus_masked-scf300000870673.2-processed-gene-2.116-mRNA-1	maker-scf300000870593.0-snap-gene-5.121-mRNA-1	augustus_masked-scf300000870748.0-processed-gene-2.106-mRNA-1	augustus_masked-scf300000870752.0-processed-gene-2.61-mRNA-1	augustus_masked-scf300000870754.0-processed-gene-12.32-mRNA-1	augustus_masked-scf300000870754.0-processed-gene-5.68-mRNA-1
	maker-scf300000870601.0-snap-gene-11.2-mRNA-1	maker-scf300000870601.0-snap-gene-15.102-mRNA-1	maker-scf300000870595.0-snap-gene-4.12-mRNA-1	maker-scf300000870603.0-snap-gene-13.75-mRNA-1	augustus_masked-scf300000870746.0-processed-gene-11.23-mRNA-1	augustus_masked-scf300000870749.0-processed-gene-2.123-mRNA-1	augustus_masked-scf300000870744.0-processed-gene-1.56-mRNA-1	maker-scf300000870586.0-snap-gene-4.107-mRNA-1	augustus_masked-scf300000870735.0-processed-gene-4.20-mRNA-1	maker-deg300000870423-snap-gene-0.51-mRNA-1	augustus_masked-scf300000870745.0-processed-gene-2.27-mRNA-1	augustus_masked-scf300000870753.0-processed-gene-0.35-mRNA-1	maker-scf300000870586.0-snap-gene-3.62-mRNA-1	maker-scf300000870744.1-snap-gene-5.45-mRNA-1	augustus_masked-scf300000870735.0-processed-gene-3.22-mRNA-1	maker-scf300000870593.0-snap-gene-4.55-mRNA-1	maker-deg300000870423-snap-gene-0.4-mRNA-1	maker-scf300000870601.0-snap-gene-5.86-mRNA-1	augustus_masked-scf300000870673.2-processed-gene-5.121-mRNA-1	maker-scf300000870593.0-snap-gene-5.122-mRNA-1	augustus_masked-scf300000870749.0-processed-gene-11.124-mRNA-1	augustus_masked-scf300000870752.0-processed-gene-5.104-mRNA-1	augustus_masked-scf300000870754.0-processed-gene-8.118-mRNA-1	augustus_masked-scf300000870754.0-processed-gene-6.0-mRNA-1
	maker-scf300000870601.0-snap-gene-12.60-mRNA-1	maker-scf300000870601.0-snap-gene-16.120-mRNA-1	maker-scf300000870595.0-snap-gene-4.32-mRNA-1	maker-scf300000870603.0-snap-gene-18.116-mRNA-1	augustus_masked-scf300000870746.0-processed-gene-13.56-mRNA-1	augustus_masked-scf300000870749.0-processed-gene-3.99-mRNA-1	augustus_masked-scf300000870744.1-processed-gene-2.15-mRNA-1	maker-scf300000870586.0-snap-gene-4.119-mRNA-1	augustus_masked-scf300000870735.0-processed-gene-9.107-mRNA-1	maker-deg300000870423-snap-gene-0.52-mRNA-1	augustus_masked-scf300000870746.0-processed-gene-11.0-mRNA-1	augustus_masked-scf300000870753.0-processed-gene-11.33-mRNA-1	maker-scf300000870586.0-snap-gene-3.82-mRNA-1	maker-scf300000870745.0-snap-gene-2.48-mRNA-1	augustus_masked-scf300000870743.0-processed-gene-0.125-mRNA-1	maker-scf300000870593.0-snap-gene-5.121-mRNA-1	maker-deg300000870423-snap-gene-0.5-mRNA-1	maker-scf300000870601.0-snap-gene-6.56-mRNA-1	augustus_masked-scf300000870673.2-processed-gene-6.41-mRNA-1	maker-scf300000870593.0-snap-gene-5.135-mRNA-1	augustus_masked-scf300000870749.0-processed-gene-11.156-mRNA-1	augustus_masked-scf300000870752.1-processed-gene-1.13-mRNA-1	maker-deg300000870423-snap-gene-0.0-mRNA-1	augustus_masked-scf300000870754.0-processed-gene-8.118-mRNA-1
	maker-scf300000870601.0-snap-gene-12.70-mRNA-1	maker-scf300000870601.0-snap-gene-17.75-mRNA-1	maker-scf300000870595.0-snap-gene-6.234-mRNA-1	maker-scf300000870603.0-snap-gene-2.10-mRNA-1	augustus_masked-scf300000870746.0-processed-gene-13.60-mRNA-1	augustus_masked-scf300000870749.0-processed-gene-9.30-mRNA-1	augustus_masked-scf300000870744.1-processed-gene-3.114-mRNA-1	maker-scf300000870593.0-snap-gene-1.114-mRNA-1	augustus_masked-scf300000870735.0-processed-gene-9.97-mRNA-1	maker-scf300000870586.0-snap-gene-2.53-mRNA-1	augustus_masked-scf300000870746.0-processed-gene-2.113-mRNA-1	augustus_masked-scf300000870753.0-processed-gene-12.12-mRNA-1	maker-scf300000870586.0-snap-gene-4.137-mRNA-1	maker-scf300000870745.0-snap-gene-2.64-mRNA-1	augustus_masked-scf300000870743.0-processed-gene-1.100-mRNA-1	maker-scf300000870593.0-snap-gene-5.122-mRNA-1	maker-deg300000870423-snap-gene-0.8-mRNA-1	maker-scf300000870601.1-snap-gene-1.42-mRNA-1	augustus_masked-scf300000870681.0-processed-gene-0.28-mRNA-1	maker-scf300000870593.0-snap-gene-6.62-mRNA-1	augustus_masked-scf300000870749.0-processed-gene-18.16-mRNA-1	augustus_masked-scf300000870753.0-processed-gene-10.89-mRNA-1	maker-deg300000870423-snap-gene-0.1-mRNA-1	augustus_masked-scf300000870754.0-processed-gene-8.76-mRNA-1
	maker-scf300000870601.0-snap-gene-12.85-mRNA-1	maker-scf300000870601.0-snap-gene-17.76-mRNA-1	maker-scf300000870595.1-snap-gene-0.104-mRNA-1	maker-scf300000870603.0-snap-gene-3.74-mRNA-1	augustus_masked-scf300000870746.0-processed-gene-3.107-mRNA-1	augustus_masked-scf300000870750.0-processed-gene-1.111-mRNA-1	augustus_masked-scf300000870744.1-processed-gene-4.12-mRNA-1	maker-scf300000870593.0-snap-gene-1.125-mRNA-1	augustus_masked-scf300000870743.0-processed-gene-0.125-mRNA-1	maker-scf300000870586.0-snap-gene-3.60-mRNA-1	augustus_masked-scf300000870746.0-processed-gene-4.99-mRNA-1	augustus_masked-scf300000870753.0-processed-gene-14.113-mRNA-1	maker-scf300000870586.0-snap-gene-4.95-mRNA-1	maker-scf300000870745.0-snap-gene-3.19-mRNA-1	augustus_masked-scf300000870743.0-processed-gene-4.17-mRNA-1	maker-scf300000870593.0-snap-gene-5.134-mRNA-1	maker-scf300000870586.0-snap-gene-0.59-mRNA-1	maker-scf300000870601.1-snap-gene-1.44-mRNA-1	augustus_masked-scf300000870693.1-processed-gene-0.83-mRNA-1	maker-scf300000870593.0-snap-gene-7.112-mRNA-1	augustus_masked-scf300000870749.0-processed-gene-2.95-mRNA-1	augustus_masked-scf300000870753.0-processed-gene-10.91-mRNA-1	maker-deg300000870423-snap-gene-0.13-mRNA-1	augustus_masked-scf300000870754.0-processed-gene-8.93-mRNA-1
	maker-scf300000870601.0-snap-gene-13.22-mRNA-1	maker-scf300000870601.0-snap-gene-19.14-mRNA-1	maker-scf300000870595.1-snap-gene-1.139-mRNA-1	maker-scf300000870603.0-snap-gene-3.87-mRNA-1	augustus_masked-scf300000870746.0-processed-gene-3.111-mRNA-1	augustus_masked-scf300000870750.0-processed-gene-2.23-mRNA-1	augustus_masked-scf300000870744.1-processed-gene-5.153-mRNA-1	maker-scf300000870593.0-snap-gene-3.63-mRNA-1	augustus_masked-scf300000870743.0-processed-gene-2.125-mRNA-1	maker-scf300000870586.0-snap-gene-3.80-mRNA-1	augustus_masked-scf300000870746.0-processed-gene-7.119-mRNA-1	augustus_masked-scf300000870753.0-processed-gene-16.129-mRNA-1	maker-scf300000870593.0-snap-gene-0.105-mRNA-1	maker-scf300000870746.0-snap-gene-3.7-mRNA-1	augustus_masked-scf300000870743.0-processed-gene-4.21-mRNA-1	maker-scf300000870593.0-snap-gene-6.60-mRNA-1	maker-scf300000870586.0-snap-gene-1.71-mRNA-1	maker-scf300000870601.1-snap-gene-5.4-mRNA-1	augustus_masked-scf300000870693.1-processed-gene-3.122-mRNA-1	maker-scf300000870595.0-augustus-gene-3.129-mRNA-1	augustus_masked-scf300000870749.0-processed-gene-7.107-mRNA-1	augustus_masked-scf300000870753.0-processed-gene-11.18-mRNA-1	maker-deg300000870423-snap-gene-0.15-mRNA-1	maker-deg300000870423-snap-gene-0.16-mRNA-1
	maker-scf300000870601.0-snap-gene-13.8-mRNA-1	maker-scf300000870601.0-snap-gene-19.29-mRNA-1	maker-scf300000870599.0-augustus-gene-1.126-mRNA-1	maker-scf300000870603.0-snap-gene-5.13-mRNA-1	augustus_masked-scf300000870746.0-processed-gene-5.42-mRNA-1	augustus_masked-scf300000870750.0-processed-gene-3.35-mRNA-1	augustus_masked-scf300000870744.1-processed-gene-5.185-mRNA-1	maker-scf300000870593.0-snap-gene-6.75-mRNA-1	augustus_masked-scf300000870744.0-processed-gene-1.53-mRNA-1	maker-scf300000870586.0-snap-gene-4.100-mRNA-1	augustus_masked-scf300000870748.0-processed-gene-2.122-mRNA-1	augustus_masked-scf300000870753.0-processed-gene-18.116-mRNA-1	maker-scf300000870593.0-snap-gene-0.113-mRNA-1	maker-scf300000870746.0-snap-gene-6.116-mRNA-1	augustus_masked-scf300000870744.1-processed-gene-1.17-mRNA-1	maker-scf300000870593.0-snap-gene-6.63-mRNA-1	maker-scf300000870586.0-snap-gene-1.77-mRNA-1	maker-scf300000870603.0-augustus-gene-8.73-mRNA-1	augustus_masked-scf300000870693.1-processed-gene-3.158-mRNA-1	maker-scf300000870595.0-snap-gene-1.46-mRNA-1	augustus_masked-scf300000870752.0-processed-gene-0.12-mRNA-1	augustus_masked-scf300000870753.0-processed-gene-11.21-mRNA-1	maker-deg300000870423-snap-gene-0.16-mRNA-1	maker-deg300000870423-snap-gene-0.31-mRNA-1
	maker-scf300000870601.0-snap-gene-14.61-mRNA-1	maker-scf300000870601.0-snap-gene-19.38-mRNA-1	maker-scf300000870599.0-snap-gene-0.78-mRNA-1	maker-scf300000870605.0-augustus-gene-0.270-mRNA-1	augustus_masked-scf300000870746.0-processed-gene-5.45-mRNA-1	augustus_masked-scf300000870752.0-processed-gene-0.37-mRNA-1	augustus_masked-scf300000870746.0-processed-gene-12.20-mRNA-1	maker-scf300000870593.0-snap-gene-7.119-mRNA-1	augustus_masked-scf300000870744.1-processed-gene-3.111-mRNA-1	maker-scf300000870586.0-snap-gene-4.136-mRNA-1	augustus_masked-scf300000870749.0-processed-gene-1.49-mRNA-1	augustus_masked-scf300000870753.0-processed-gene-21.49-mRNA-1	maker-scf300000870593.0-snap-gene-1.114-mRNA-1	maker-scf300000870746.0-snap-gene-7.58-mRNA-1	augustus_masked-scf300000870744.1-processed-gene-3.144-mRNA-1	maker-scf300000870593.0-snap-gene-6.69-mRNA-1	maker-scf300000870586.0-snap-gene-2.67-mRNA-1	maker-scf300000870603.0-snap-gene-12.115-mRNA-1	augustus_masked-scf300000870693.1-processed-gene-4.149-mRNA-1	maker-scf300000870595.0-snap-gene-3.72-mRNA-1	augustus_masked-scf300000870752.0-processed-gene-1.25-mRNA-1	augustus_masked-scf300000870753.0-processed-gene-11.58-mRNA-1	maker-deg300000870423-snap-gene-0.17-mRNA-1	maker-scf300000870586.0-snap-gene-0.55-mRNA-1
	maker-scf300000870601.0-snap-gene-14.83-mRNA-1	maker-scf300000870601.0-snap-gene-3.76-mRNA-1	maker-scf300000870599.0-snap-gene-1.160-mRNA-1	maker-scf300000870607.0-snap-gene-1.10-mRNA-1	augustus_masked-scf300000870746.0-processed-gene-6.43-mRNA-1	augustus_masked-scf300000870753.0-processed-gene-11.33-mRNA-1	augustus_masked-scf300000870746.0-processed-gene-12.36-mRNA-1	maker-scf300000870593.0-snap-gene-7.96-mRNA-1	augustus_masked-scf300000870745.0-processed-gene-2.14-mRNA-1	maker-scf300000870586.0-snap-gene-4.141-mRNA-1	augustus_masked-scf300000870749.0-processed-gene-14.31-mRNA-1	augustus_masked-scf300000870753.0-processed-gene-26.31-mRNA-1	maker-scf300000870593.0-snap-gene-3.55-mRNA-1	maker-scf300000870748.0-snap-gene-0.93-mRNA-1	augustus_masked-scf300000870744.1-processed-gene-5.186-mRNA-1	maker-scf300000870593.0-snap-gene-6.83-mRNA-1	maker-scf300000870586.0-snap-gene-3.72-mRNA-1	maker-scf300000870603.0-snap-gene-13.55-mRNA-1	augustus_masked-scf300000870693.1-processed-gene-4.181-mRNA-1	maker-scf300000870595.0-snap-gene-4.35-mRNA-1	augustus_masked-scf300000870752.0-processed-gene-2.61-mRNA-1	augustus_masked-scf300000870753.0-processed-gene-6.99-mRNA-1	maker-deg300000870423-snap-gene-0.18-mRNA-1	maker-scf300000870586.0-snap-gene-0.62-mRNA-1
	maker-scf300000870601.0-snap-gene-3.68-mRNA-1	maker-scf300000870601.0-snap-gene-4.1-mRNA-1	maker-scf300000870599.0-snap-gene-1.187-mRNA-1	maker-scf300000870607.0-snap-gene-1.15-mRNA-1	augustus_masked-scf300000870748.0-processed-gene-1.98-mRNA-1	augustus_masked-scf300000870753.0-processed-gene-12.16-mRNA-1	augustus_masked-scf300000870746.0-processed-gene-13.36-mRNA-1	maker-scf300000870595.0-augustus-gene-4.105-mRNA-1	augustus_masked-scf300000870745.0-processed-gene-3.191-mRNA-1	maker-scf300000870593.0-snap-gene-2.49-mRNA-1	augustus_masked-scf300000870749.0-processed-gene-15.42-mRNA-1	augustus_masked-scf300000870754.0-processed-gene-0.27-mRNA-1	maker-scf300000870593.0-snap-gene-4.68-mRNA-1	maker-scf300000870748.0-snap-gene-0.94-mRNA-1	augustus_masked-scf300000870745.0-processed-gene-2.27-mRNA-1	maker-scf300000870593.0-snap-gene-7.114-mRNA-1	maker-scf300000870586.0-snap-gene-3.80-mRNA-1	maker-scf300000870603.0-snap-gene-18.117-mRNA-1	augustus_masked-scf300000870717.0-processed-gene-0.0-mRNA-1	maker-scf300000870595.0-snap-gene-4.40-mRNA-1	augustus_masked-scf300000870752.0-processed-gene-5.104-mRNA-1	augustus_masked-scf300000870753.0-processed-gene-8.55-mRNA-1	maker-deg300000870423-snap-gene-0.19-mRNA-1	maker-scf300000870586.0-snap-gene-3.76-mRNA-1
	maker-scf300000870601.0-snap-gene-4.28-mRNA-1	maker-scf300000870601.0-snap-gene-4.27-mRNA-1	maker-scf300000870601.0-augustus-gene-10.45-mRNA-1	maker-scf300000870607.0-snap-gene-1.27-mRNA-1	augustus_masked-scf300000870749.0-processed-gene-17.100-mRNA-1	augustus_masked-scf300000870753.0-processed-gene-18.114-mRNA-1	augustus_masked-scf300000870746.0-processed-gene-13.59-mRNA-1	maker-scf300000870595.0-augustus-gene-4.120-mRNA-1	augustus_masked-scf300000870746.0-processed-gene-0.102-mRNA-1	maker-scf300000870593.0-snap-gene-2.56-mRNA-1	augustus_masked-scf300000870749.0-processed-gene-17.105-mRNA-1	augustus_masked-scf300000870754.0-processed-gene-6.13-mRNA-1	maker-scf300000870593.0-snap-gene-4.82-mRNA-1	maker-scf300000870748.0-snap-gene-3.0-mRNA-1	augustus_masked-scf300000870745.0-processed-gene-3.233-mRNA-1	maker-scf300000870595.0-snap-gene-2.73-mRNA-1	maker-scf300000870586.0-snap-gene-4.114-mRNA-1	maker-scf300000870603.0-snap-gene-2.10-mRNA-1	augustus_masked-scf300000870733.0-processed-gene-0.1-mRNA-1	maker-scf300000870595.0-snap-gene-5.59-mRNA-1	augustus_masked-scf300000870752.0-processed-gene-6.157-mRNA-1	augustus_masked-scf300000870754.0-processed-gene-10.103-mRNA-1	maker-deg300000870423-snap-gene-0.20-mRNA-1	maker-scf300000870586.0-snap-gene-4.108-mRNA-1
	maker-scf300000870601.0-snap-gene-4.31-mRNA-1	maker-scf300000870601.0-snap-gene-4.29-mRNA-1	maker-scf300000870601.0-snap-gene-11.11-mRNA-1	maker-scf300000870611.0-snap-gene-0.128-mRNA-1	augustus_masked-scf300000870749.0-processed-gene-17.105-mRNA-1	augustus_masked-scf300000870753.0-processed-gene-20.117-mRNA-1	augustus_masked-scf300000870746.0-processed-gene-3.111-mRNA-1	maker-scf300000870595.0-snap-gene-1.56-mRNA-1	augustus_masked-scf300000870746.0-processed-gene-11.0-mRNA-1	maker-scf300000870593.0-snap-gene-3.54-mRNA-1	augustus_masked-scf300000870749.0-processed-gene-18.37-mRNA-1	augustus_masked-scf300000870754.0-processed-gene-6.30-mRNA-1	maker-scf300000870593.0-snap-gene-5.134-mRNA-1	maker-scf300000870748.0-snap-gene-3.10-mRNA-1	augustus_masked-scf300000870746.0-processed-gene-11.0-mRNA-1	maker-scf300000870595.0-snap-gene-2.84-mRNA-1	maker-scf300000870586.0-snap-gene-4.137-mRNA-1	maker-scf300000870603.0-snap-gene-3.77-mRNA-1	augustus_masked-scf300000870735.0-processed-gene-1.107-mRNA-1	maker-scf300000870595.0-snap-gene-6.224-mRNA-1	augustus_masked-scf300000870752.1-processed-gene-1.13-mRNA-1	augustus_masked-scf300000870754.0-processed-gene-5.64-mRNA-1	maker-deg300000870423-snap-gene-0.21-mRNA-1	maker-scf300000870586.0-snap-gene-4.109-mRNA-1
	maker-scf300000870601.0-snap-gene-6.51-mRNA-1	maker-scf300000870601.0-snap-gene-4.8-mRNA-1	maker-scf300000870601.0-snap-gene-11.18-mRNA-1	maker-scf300000870613.1-snap-gene-0.132-mRNA-1	augustus_masked-scf300000870749.0-processed-gene-18.10-mRNA-1	augustus_masked-scf300000870753.0-processed-gene-22.9-mRNA-1	augustus_masked-scf300000870748.0-processed-gene-1.98-mRNA-1	maker-scf300000870595.0-snap-gene-3.55-mRNA-1	augustus_masked-scf300000870746.0-processed-gene-11.17-mRNA-1	maker-scf300000870593.0-snap-gene-3.70-mRNA-1	augustus_masked-scf300000870749.0-processed-gene-18.72-mRNA-1	augustus_masked-scf300000870754.0-processed-gene-7.10-mRNA-1	maker-scf300000870595.0-snap-gene-3.51-mRNA-1	maker-scf300000870749.0-snap-gene-11.10-mRNA-1	augustus_masked-scf300000870746.0-processed-gene-11.23-mRNA-1	maker-scf300000870595.0-snap-gene-3.72-mRNA-1	maker-scf300000870586.0-snap-gene-4.98-mRNA-1	maker-scf300000870603.0-snap-gene-5.19-mRNA-1	augustus_masked-scf300000870735.0-processed-gene-10.37-mRNA-1	maker-scf300000870595.0-snap-gene-6.226-mRNA-1	augustus_masked-scf300000870753.0-processed-gene-10.106-mRNA-1	augustus_masked-scf300000870754.0-processed-gene-5.68-mRNA-1	maker-deg300000870423-snap-gene-0.22-mRNA-1	maker-scf300000870586.0-snap-gene-4.116-mRNA-1
	maker-scf300000870601.0-snap-gene-7.117-mRNA-1	maker-scf300000870601.0-snap-gene-6.51-mRNA-1	maker-scf300000870601.0-snap-gene-12.81-mRNA-1	maker-scf300000870613.1-snap-gene-0.152-mRNA-1	augustus_masked-scf300000870749.0-processed-gene-18.30-mRNA-1	augustus_masked-scf300000870753.0-processed-gene-23.39-mRNA-1	augustus_masked-scf300000870748.0-processed-gene-2.106-mRNA-1	maker-scf300000870595.0-snap-gene-4.12-mRNA-1	augustus_masked-scf300000870746.0-processed-gene-2.113-mRNA-1	maker-scf300000870593.0-snap-gene-4.64-mRNA-1	augustus_masked-scf300000870749.0-processed-gene-2.125-mRNA-1	augustus_masked-scf300000870754.0-processed-gene-8.71-mRNA-1	maker-scf300000870595.0-snap-gene-3.63-mRNA-1	maker-scf300000870749.0-snap-gene-11.36-mRNA-1	augustus_masked-scf300000870746.0-processed-gene-12.27-mRNA-1	maker-scf300000870595.0-snap-gene-4.35-mRNA-1	maker-scf300000870593.0-snap-gene-0.105-mRNA-1	maker-scf300000870603.0-snap-gene-6.51-mRNA-1	augustus_masked-scf300000870735.0-processed-gene-11.115-mRNA-1	maker-scf300000870595.1-augustus-gene-0.46-mRNA-1	augustus_masked-scf300000870753.0-processed-gene-10.89-mRNA-1	augustus_masked-scf300000870754.0-processed-gene-6.0-mRNA-1	maker-deg300000870423-snap-gene-0.23-mRNA-1	maker-scf300000870586.0-snap-gene-4.137-mRNA-1
	maker-scf300000870601.0-snap-gene-7.118-mRNA-1	maker-scf300000870601.0-snap-gene-6.67-mRNA-1	maker-scf300000870601.0-snap-gene-12.85-mRNA-1	maker-scf300000870619.2-snap-gene-3.127-mRNA-1	augustus_masked-scf300000870749.0-processed-gene-18.85-mRNA-1	augustus_masked-scf300000870753.0-processed-gene-4.122-mRNA-1	augustus_masked-scf300000870748.0-processed-gene-4.41-mRNA-1	maker-scf300000870595.0-snap-gene-4.16-mRNA-1	augustus_masked-scf300000870746.0-processed-gene-2.114-mRNA-1	maker-scf300000870593.0-snap-gene-4.66-mRNA-1	augustus_masked-scf300000870749.0-processed-gene-4.125-mRNA-1	maker-deg300000870423-snap-gene-0.10-mRNA-1	maker-scf300000870595.0-snap-gene-5.49-mRNA-1	maker-scf300000870749.0-snap-gene-18.148-mRNA-1	augustus_masked-scf300000870746.0-processed-gene-12.36-mRNA-1	maker-scf300000870595.0-snap-gene-4.40-mRNA-1	maker-scf300000870593.0-snap-gene-0.113-mRNA-1	maker-scf300000870603.0-snap-gene-8.5-mRNA-1	augustus_masked-scf300000870735.0-processed-gene-14.178-mRNA-1	maker-scf300000870595.1-snap-gene-1.126-mRNA-1	augustus_masked-scf300000870753.0-processed-gene-10.91-mRNA-1	augustus_masked-scf300000870754.0-processed-gene-6.27-mRNA-1	maker-deg300000870423-snap-gene-0.25-mRNA-1	maker-scf300000870593.0-snap-gene-0.104-mRNA-1
	maker-scf300000870601.0-snap-gene-7.125-mRNA-1	maker-scf300000870601.0-snap-gene-7.126-mRNA-1	maker-scf300000870601.0-snap-gene-13.9-mRNA-1	maker-scf300000870626.0-snap-gene-0.48-mRNA-1	augustus_masked-scf300000870749.0-processed-gene-2.95-mRNA-1	augustus_masked-scf300000870753.0-processed-gene-7.27-mRNA-1	augustus_masked-scf300000870749.0-processed-gene-10.93-mRNA-1	maker-scf300000870595.0-snap-gene-4.32-mRNA-1	augustus_masked-scf300000870746.0-processed-gene-5.7-mRNA-1	maker-scf300000870593.0-snap-gene-4.76-mRNA-1	augustus_masked-scf300000870749.0-processed-gene-7.91-mRNA-1	maker-deg300000870423-snap-gene-0.11-mRNA-1	maker-scf300000870595.0-snap-gene-6.216-mRNA-1	maker-scf300000870749.0-snap-gene-18.163-mRNA-1	augustus_masked-scf300000870746.0-processed-gene-13.56-mRNA-1	maker-scf300000870595.0-snap-gene-5.59-mRNA-1	maker-scf300000870593.0-snap-gene-3.55-mRNA-1	maker-scf300000870603.0-snap-gene-9.117-mRNA-1	augustus_masked-scf300000870735.0-processed-gene-14.225-mRNA-1	maker-scf300000870595.1-snap-gene-2.133-mRNA-1	augustus_masked-scf300000870753.0-processed-gene-11.18-mRNA-1	augustus_masked-scf300000870754.0-processed-gene-6.3-mRNA-1	maker-deg300000870423-snap-gene-0.29-mRNA-1	maker-scf300000870593.0-snap-gene-0.113-mRNA-1
	maker-scf300000870601.1-snap-gene-4.144-mRNA-1	maker-scf300000870601.0-snap-gene-8.120-mRNA-1	maker-scf300000870601.0-snap-gene-14.63-mRNA-1	maker-scf300000870629.0-snap-gene-3.50-mRNA-1	augustus_masked-scf300000870749.0-processed-gene-7.107-mRNA-1	augustus_masked-scf300000870753.0-processed-gene-8.11-mRNA-1	augustus_masked-scf300000870749.0-processed-gene-15.42-mRNA-1	maker-scf300000870595.0-snap-gene-4.5-mRNA-1	augustus_masked-scf300000870746.0-processed-gene-8.126-mRNA-1	maker-scf300000870593.0-snap-gene-4.77-mRNA-1	augustus_masked-scf300000870749.0-processed-gene-9.28-mRNA-1	maker-deg300000870423-snap-gene-0.2-mRNA-1	maker-scf300000870595.0-snap-gene-6.229-mRNA-1	maker-scf300000870749.0-snap-gene-2.17-mRNA-1	augustus_masked-scf300000870746.0-processed-gene-3.107-mRNA-1	maker-scf300000870595.1-snap-gene-0.110-mRNA-1	maker-scf300000870593.0-snap-gene-4.61-mRNA-1	maker-scf300000870603.0-snap-gene-9.130-mRNA-1	augustus_masked-scf300000870735.0-processed-gene-9.97-mRNA-1	maker-scf300000870595.1-snap-gene-2.140-mRNA-1	augustus_masked-scf300000870753.0-processed-gene-11.58-mRNA-1	augustus_masked-scf300000870754.0-processed-gene-8.118-mRNA-1	maker-deg300000870423-snap-gene-0.31-mRNA-1	maker-scf300000870593.0-snap-gene-1.115-mRNA-1
	maker-scf300000870601.1-snap-gene-4.150-mRNA-1	maker-scf300000870601.1-snap-gene-0.53-mRNA-1	maker-scf300000870601.0-snap-gene-15.117-mRNA-1	maker-scf300000870629.0-snap-gene-4.106-mRNA-1	augustus_masked-scf300000870749.0-processed-gene-7.91-mRNA-1	augustus_masked-scf300000870754.0-processed-gene-0.10-mRNA-1	augustus_masked-scf300000870749.0-processed-gene-16.121-mRNA-1	maker-scf300000870595.0-snap-gene-5.48-mRNA-1	augustus_masked-scf300000870748.0-processed-gene-2.122-mRNA-1	maker-scf300000870593.0-snap-gene-4.87-mRNA-1	augustus_masked-scf300000870749.1-processed-gene-0.42-mRNA-1	maker-deg300000870423-snap-gene-0.26-mRNA-1	maker-scf300000870595.0-snap-gene-6.233-mRNA-1	maker-scf300000870750.0-snap-gene-4.140-mRNA-1	augustus_masked-scf300000870746.0-processed-gene-5.45-mRNA-1	maker-scf300000870595.1-snap-gene-1.129-mRNA-1	maker-scf300000870593.0-snap-gene-4.68-mRNA-1	maker-scf300000870603.1-snap-gene-0.85-mRNA-1	augustus_masked-scf300000870743.0-processed-gene-0.125-mRNA-1	maker-scf300000870599.0-snap-gene-0.89-mRNA-1	augustus_masked-scf300000870754.0-processed-gene-5.46-mRNA-1	augustus_masked-scf300000870754.0-processed-gene-8.76-mRNA-1	maker-deg300000870423-snap-gene-0.56-mRNA-1	maker-scf300000870593.0-snap-gene-1.117-mRNA-1
	maker-scf300000870601.1-snap-gene-6.126-mRNA-1	maker-scf300000870601.1-snap-gene-0.62-mRNA-1	maker-scf300000870601.0-snap-gene-16.120-mRNA-1	maker-scf300000870629.0-snap-gene-4.108-mRNA-1	augustus_masked-scf300000870749.1-processed-gene-0.56-mRNA-1	augustus_masked-scf300000870754.0-processed-gene-1.146-mRNA-1	augustus_masked-scf300000870749.0-processed-gene-18.10-mRNA-1	maker-scf300000870595.1-snap-gene-2.117-mRNA-1	augustus_masked-scf300000870748.0-processed-gene-2.135-mRNA-1	maker-scf300000870593.0-snap-gene-6.68-mRNA-1	augustus_masked-scf300000870749.1-processed-gene-0.66-mRNA-1	maker-deg300000870423-snap-gene-0.27-mRNA-1	maker-scf300000870595.1-snap-gene-1.131-mRNA-1	maker-scf300000870752.0-snap-gene-1.122-mRNA-1	augustus_masked-scf300000870746.0-processed-gene-6.43-mRNA-1	maker-scf300000870595.1-snap-gene-2.140-mRNA-1	maker-scf300000870593.0-snap-gene-4.82-mRNA-1	maker-scf300000870605.0-snap-gene-0.133-mRNA-1	augustus_masked-scf300000870743.0-processed-gene-3.28-mRNA-1	maker-scf300000870599.0-snap-gene-1.192-mRNA-1	augustus_masked-scf300000870754.0-processed-gene-5.64-mRNA-1	augustus_masked-scf300000870754.0-processed-gene-8.93-mRNA-1	maker-deg300000870423-snap-gene-0.57-mRNA-1	maker-scf300000870593.0-snap-gene-2.61-mRNA-1
	maker-scf300000870603.0-augustus-gene-15.7-mRNA-1	maker-scf300000870601.1-snap-gene-3.67-mRNA-1	maker-scf300000870601.0-snap-gene-17.78-mRNA-1	maker-scf300000870629.0-snap-gene-5.13-mRNA-1	augustus_masked-scf300000870750.0-processed-gene-0.27-mRNA-1	augustus_masked-scf300000870754.0-processed-gene-12.45-mRNA-1	augustus_masked-scf300000870749.0-processed-gene-18.30-mRNA-1	maker-scf300000870595.1-snap-gene-2.145-mRNA-1	augustus_masked-scf300000870748.0-processed-gene-4.20-mRNA-1	maker-scf300000870593.0-snap-gene-6.83-mRNA-1	augustus_masked-scf300000870750.0-processed-gene-3.0-mRNA-1	maker-deg300000870423-snap-gene-0.28-mRNA-1	maker-scf300000870599.0-snap-gene-1.151-mRNA-1	maker-scf300000870752.0-snap-gene-1.91-mRNA-1	augustus_masked-scf300000870747.0-processed-gene-0.89-mRNA-1	maker-scf300000870599.0-snap-gene-0.89-mRNA-1	maker-scf300000870593.0-snap-gene-4.92-mRNA-1	maker-scf300000870605.0-snap-gene-0.156-mRNA-1	augustus_masked-scf300000870743.0-processed-gene-4.21-mRNA-1	maker-scf300000870601.0-snap-gene-1.72-mRNA-1	augustus_masked-scf300000870754.0-processed-gene-5.68-mRNA-1	maker-deg300000870423-augustus-gene-0.153-mRNA-1	maker-deg300000870423-snap-gene-0.58-mRNA-1	maker-scf300000870593.0-snap-gene-2.62-mRNA-1
	maker-scf300000870603.0-snap-gene-1.110-mRNA-1	maker-scf300000870601.1-snap-gene-6.103-mRNA-1	maker-scf300000870601.0-snap-gene-18.72-mRNA-1	maker-scf300000870631.0-snap-gene-0.126-mRNA-1	augustus_masked-scf300000870750.0-processed-gene-3.40-mRNA-1	augustus_masked-scf300000870754.0-processed-gene-12.65-mRNA-1	augustus_masked-scf300000870749.0-processed-gene-18.7-mRNA-1	maker-scf300000870595.1-snap-gene-2.148-mRNA-1	augustus_masked-scf300000870749.0-processed-gene-10.93-mRNA-1	maker-scf300000870593.0-snap-gene-7.120-mRNA-1	augustus_masked-scf300000870750.0-processed-gene-3.29-mRNA-1	maker-deg300000870423-snap-gene-0.30-mRNA-1	maker-scf300000870601.0-snap-gene-12.82-mRNA-1	maker-scf300000870752.0-snap-gene-1.95-mRNA-1	augustus_masked-scf300000870748.0-processed-gene-1.107-mRNA-1	maker-scf300000870599.0-snap-gene-1.142-mRNA-1	maker-scf300000870593.0-snap-gene-5.115-mRNA-1	maker-scf300000870607.0-snap-gene-0.1-mRNA-1	augustus_masked-scf300000870744.1-processed-gene-4.17-mRNA-1	maker-scf300000870601.0-snap-gene-10.102-mRNA-1	augustus_masked-scf300000870754.0-processed-gene-6.3-mRNA-1	maker-deg300000870423-snap-gene-0.36-mRNA-1	maker-deg300000870423-snap-gene-0.62-mRNA-1	maker-scf300000870593.0-snap-gene-4.68-mRNA-1
	maker-scf300000870603.0-snap-gene-1.120-mRNA-1	maker-scf300000870603.0-snap-gene-13.59-mRNA-1	maker-scf300000870601.0-snap-gene-2.112-mRNA-1	maker-scf300000870631.0-snap-gene-3.74-mRNA-1	augustus_masked-scf300000870752.0-processed-gene-2.59-mRNA-1	maker-deg300000870423-snap-gene-0.50-mRNA-1	augustus_masked-scf300000870749.0-processed-gene-2.95-mRNA-1	maker-scf300000870595.1-snap-gene-2.150-mRNA-1	augustus_masked-scf300000870749.0-processed-gene-11.120-mRNA-1	maker-scf300000870593.0-snap-gene-7.129-mRNA-1	augustus_masked-scf300000870750.0-processed-gene-3.35-mRNA-1	maker-deg300000870423-snap-gene-0.33-mRNA-1	maker-scf300000870601.0-snap-gene-12.83-mRNA-1	maker-scf300000870752.0-snap-gene-2.22-mRNA-1	augustus_masked-scf300000870749.0-processed-gene-1.49-mRNA-1	maker-scf300000870599.0-snap-gene-1.149-mRNA-1	maker-scf300000870593.0-snap-gene-5.122-mRNA-1	maker-scf300000870607.0-snap-gene-0.10-mRNA-1	augustus_masked-scf300000870745.0-processed-gene-2.27-mRNA-1	maker-scf300000870601.0-snap-gene-10.116-mRNA-1	augustus_masked-scf300000870754.0-processed-gene-8.118-mRNA-1	maker-deg300000870423-snap-gene-0.4-mRNA-1	maker-deg300000870423-snap-gene-0.63-mRNA-1	maker-scf300000870593.0-snap-gene-4.79-mRNA-1
	maker-scf300000870603.0-snap-gene-12.154-mRNA-1	maker-scf300000870603.0-snap-gene-13.75-mRNA-1	maker-scf300000870601.0-snap-gene-2.121-mRNA-1	maker-scf300000870631.0-snap-gene-3.98-mRNA-1	augustus_masked-scf300000870752.0-processed-gene-4.17-mRNA-1	maker-deg300000870423-snap-gene-0.52-mRNA-1	augustus_masked-scf300000870750.0-processed-gene-2.23-mRNA-1	maker-scf300000870599.0-augustus-gene-1.126-mRNA-1	augustus_masked-scf300000870749.0-processed-gene-11.137-mRNA-1	maker-scf300000870595.0-augustus-gene-2.143-mRNA-1	augustus_masked-scf300000870752.0-processed-gene-3.95-mRNA-1	maker-deg300000870423-snap-gene-0.34-mRNA-1	maker-scf300000870601.0-snap-gene-13.5-mRNA-1	maker-scf300000870752.0-snap-gene-5.26-mRNA-1	augustus_masked-scf300000870749.0-processed-gene-18.16-mRNA-1	maker-scf300000870599.0-snap-gene-1.188-mRNA-1	maker-scf300000870593.0-snap-gene-5.135-mRNA-1	maker-scf300000870607.0-snap-gene-1.28-mRNA-1	augustus_masked-scf300000870746.0-processed-gene-0.102-mRNA-1	maker-scf300000870601.0-snap-gene-12.67-mRNA-1	augustus_masked-scf300000870754.0-processed-gene-8.76-mRNA-1	maker-scf300000870586.0-augustus-gene-3.130-mRNA-1	maker-scf300000870586.0-snap-gene-0.55-mRNA-1	maker-scf300000870593.0-snap-gene-4.81-mRNA-1
	maker-scf300000870603.0-snap-gene-13.80-mRNA-1	maker-scf300000870603.0-snap-gene-14.117-mRNA-1	maker-scf300000870601.0-snap-gene-3.75-mRNA-1	maker-scf300000870631.0-snap-gene-3.99-mRNA-1	augustus_masked-scf300000870752.0-processed-gene-5.101-mRNA-1	maker-scf300000870586.0-snap-gene-0.56-mRNA-1	augustus_masked-scf300000870750.0-processed-gene-2.35-mRNA-1	maker-scf300000870599.0-snap-gene-1.160-mRNA-1	augustus_masked-scf300000870749.0-processed-gene-12.147-mRNA-1	maker-scf300000870595.0-augustus-gene-4.120-mRNA-1	augustus_masked-scf300000870752.0-processed-gene-4.17-mRNA-1	maker-deg300000870423-snap-gene-0.5-mRNA-1	maker-scf300000870601.0-snap-gene-14.78-mRNA-1	maker-scf300000870752.0-snap-gene-6.128-mRNA-1	augustus_masked-scf300000870749.0-processed-gene-18.45-mRNA-1	maker-scf300000870599.0-snap-gene-1.192-mRNA-1	maker-scf300000870593.0-snap-gene-5.136-mRNA-1	maker-scf300000870613.1-snap-gene-0.163-mRNA-1	augustus_masked-scf300000870746.0-processed-gene-11.0-mRNA-1	maker-scf300000870601.0-snap-gene-13.2-mRNA-1	augustus_masked-scf300000870754.0-processed-gene-8.93-mRNA-1	maker-scf300000870586.0-snap-gene-0.55-mRNA-1	maker-scf300000870586.0-snap-gene-0.75-mRNA-1	maker-scf300000870593.0-snap-gene-5.117-mRNA-1
	maker-scf300000870603.0-snap-gene-14.116-mRNA-1	maker-scf300000870603.0-snap-gene-2.10-mRNA-1	maker-scf300000870601.0-snap-gene-4.8-mRNA-1	maker-scf300000870631.0-snap-gene-4.57-mRNA-1	augustus_masked-scf300000870752.0-processed-gene-6.178-mRNA-1	maker-scf300000870586.0-snap-gene-0.57-mRNA-1	augustus_masked-scf300000870750.0-processed-gene-4.50-mRNA-1	maker-scf300000870599.0-snap-gene-1.175-mRNA-1	augustus_masked-scf300000870749.0-processed-gene-15.13-mRNA-1	maker-scf300000870595.0-snap-gene-0.4-mRNA-1	augustus_masked-scf300000870753.0-processed-gene-10.83-mRNA-1	maker-deg300000870423-snap-gene-0.50-mRNA-1	maker-scf300000870601.0-snap-gene-17.74-mRNA-1	maker-scf300000870752.1-snap-gene-0.53-mRNA-1	augustus_masked-scf300000870749.0-processed-gene-4.125-mRNA-1	maker-scf300000870601.0-augustus-gene-5.38-mRNA-1	maker-scf300000870593.0-snap-gene-7.101-mRNA-1	maker-scf300000870619.2-augustus-gene-3.92-mRNA-1	augustus_masked-scf300000870746.0-processed-gene-12.27-mRNA-1	maker-scf300000870601.0-snap-gene-14.73-mRNA-1	maker-scf300000870586.0-augustus-gene-3.130-mRNA-1	maker-scf300000870586.0-snap-gene-0.59-mRNA-1	maker-scf300000870586.0-snap-gene-1.65-mRNA-1	maker-scf300000870593.0-snap-gene-5.122-mRNA-1
	maker-scf300000870603.0-snap-gene-17.10-mRNA-1	maker-scf300000870603.0-snap-gene-2.9-mRNA-1	maker-scf300000870601.0-snap-gene-7.115-mRNA-1	maker-scf300000870631.0-snap-gene-5.101-mRNA-1	augustus_masked-scf300000870753.0-processed-gene-0.35-mRNA-1	maker-scf300000870586.0-snap-gene-0.71-mRNA-1	augustus_masked-scf300000870752.1-processed-gene-1.13-mRNA-1	maker-scf300000870601.0-augustus-gene-6.83-mRNA-1	augustus_masked-scf300000870749.0-processed-gene-15.42-mRNA-1	maker-scf300000870595.0-snap-gene-0.9-mRNA-1	augustus_masked-scf300000870753.0-processed-gene-12.12-mRNA-1	maker-deg300000870423-snap-gene-0.51-mRNA-1	maker-scf300000870601.0-snap-gene-18.54-mRNA-1	maker-scf300000870752.1-snap-gene-1.119-mRNA-1	augustus_masked-scf300000870749.0-processed-gene-6.85-mRNA-1	maker-scf300000870601.0-snap-gene-1.60-mRNA-1	maker-scf300000870595.0-snap-gene-0.12-mRNA-1	maker-scf300000870619.2-snap-gene-2.1-mRNA-1	augustus_masked-scf300000870746.0-processed-gene-13.18-mRNA-1	maker-scf300000870601.0-snap-gene-17.75-mRNA-1	maker-scf300000870586.0-snap-gene-1.66-mRNA-1	maker-scf300000870586.0-snap-gene-1.72-mRNA-1	maker-scf300000870586.0-snap-gene-2.61-mRNA-1	maker-scf300000870593.0-snap-gene-6.63-mRNA-1
	maker-scf300000870603.0-snap-gene-17.5-mRNA-1	maker-scf300000870603.0-snap-gene-4.117-mRNA-1	maker-scf300000870601.0-snap-gene-8.115-mRNA-1	maker-scf300000870641.0-snap-gene-0.59-mRNA-1	augustus_masked-scf300000870753.0-processed-gene-1.2-mRNA-1	maker-scf300000870586.0-snap-gene-1.63-mRNA-1	augustus_masked-scf300000870753.0-processed-gene-1.2-mRNA-1	maker-scf300000870601.0-snap-gene-10.110-mRNA-1	augustus_masked-scf300000870749.0-processed-gene-18.72-mRNA-1	maker-scf300000870595.0-snap-gene-4.10-mRNA-1	augustus_masked-scf300000870753.0-processed-gene-14.113-mRNA-1	maker-deg300000870423-snap-gene-0.52-mRNA-1	maker-scf300000870601.0-snap-gene-18.70-mRNA-1	maker-scf300000870753.0-snap-gene-1.82-mRNA-1	augustus_masked-scf300000870750.0-processed-gene-1.111-mRNA-1	maker-scf300000870601.0-snap-gene-1.74-mRNA-1	maker-scf300000870595.0-snap-gene-1.52-mRNA-1	maker-scf300000870619.2-snap-gene-2.21-mRNA-1	augustus_masked-scf300000870746.0-processed-gene-13.56-mRNA-1	maker-scf300000870601.0-snap-gene-17.76-mRNA-1	maker-scf300000870586.0-snap-gene-1.72-mRNA-1	maker-scf300000870586.0-snap-gene-1.74-mRNA-1	maker-scf300000870586.0-snap-gene-4.100-mRNA-1	maker-scf300000870593.0-snap-gene-7.101-mRNA-1
	maker-scf300000870603.0-snap-gene-18.102-mRNA-1	maker-scf300000870603.0-snap-gene-5.13-mRNA-1	maker-scf300000870601.0-snap-gene-8.126-mRNA-1	maker-scf300000870641.0-snap-gene-1.17-mRNA-1	augustus_masked-scf300000870753.0-processed-gene-12.12-mRNA-1	maker-scf300000870586.0-snap-gene-2.61-mRNA-1	augustus_masked-scf300000870753.0-processed-gene-1.38-mRNA-1	maker-scf300000870601.0-snap-gene-10.118-mRNA-1	augustus_masked-scf300000870749.0-processed-gene-2.123-mRNA-1	maker-scf300000870595.0-snap-gene-4.24-mRNA-1	augustus_masked-scf300000870753.0-processed-gene-16.129-mRNA-1	maker-deg300000870423-snap-gene-0.53-mRNA-1	maker-scf300000870601.0-snap-gene-19.26-mRNA-1	maker-scf300000870753.0-snap-gene-10.30-mRNA-1	augustus_masked-scf300000870750.0-processed-gene-3.0-mRNA-1	maker-scf300000870601.0-snap-gene-10.102-mRNA-1	maker-scf300000870595.0-snap-gene-2.66-mRNA-1	maker-scf300000870619.2-snap-gene-4.102-mRNA-1	augustus_masked-scf300000870746.0-processed-gene-2.113-mRNA-1	maker-scf300000870601.0-snap-gene-18.63-mRNA-1	maker-scf300000870586.0-snap-gene-1.78-mRNA-1	maker-scf300000870586.0-snap-gene-2.61-mRNA-1	maker-scf300000870586.0-snap-gene-4.105-mRNA-1	maker-scf300000870593.0-snap-gene-7.121-mRNA-1
	maker-scf300000870603.0-snap-gene-2.10-mRNA-1	maker-scf300000870603.0-snap-gene-5.4-mRNA-1	maker-scf300000870601.0-snap-gene-8.131-mRNA-1	maker-scf300000870641.0-snap-gene-1.5-mRNA-1	augustus_masked-scf300000870753.0-processed-gene-12.16-mRNA-1	maker-scf300000870586.0-snap-gene-3.62-mRNA-1	augustus_masked-scf300000870753.0-processed-gene-11.33-mRNA-1	maker-scf300000870601.0-snap-gene-11.11-mRNA-1	augustus_masked-scf300000870749.0-processed-gene-3.92-mRNA-1	maker-scf300000870595.0-snap-gene-4.40-mRNA-1	augustus_masked-scf300000870753.0-processed-gene-21.49-mRNA-1	maker-deg300000870423-snap-gene-0.54-mRNA-1	maker-scf300000870601.0-snap-gene-19.37-mRNA-1	maker-scf300000870753.0-snap-gene-12.57-mRNA-1	augustus_masked-scf300000870752.0-processed-gene-0.12-mRNA-1	maker-scf300000870601.0-snap-gene-11.2-mRNA-1	maker-scf300000870595.0-snap-gene-3.51-mRNA-1	maker-scf300000870619.2-snap-gene-4.106-mRNA-1	augustus_masked-scf300000870746.0-processed-gene-4.99-mRNA-1	maker-scf300000870601.0-snap-gene-19.38-mRNA-1	maker-scf300000870586.0-snap-gene-2.61-mRNA-1	maker-scf300000870586.0-snap-gene-3.61-mRNA-1	maker-scf300000870586.0-snap-gene-4.108-mRNA-1	maker-scf300000870593.0-snap-gene-7.92-mRNA-1
	maker-scf300000870603.0-snap-gene-2.12-mRNA-1	maker-scf300000870605.0-snap-gene-0.139-mRNA-1	maker-scf300000870601.0-snap-gene-8.137-mRNA-1	maker-scf300000870641.0-snap-gene-2.104-mRNA-1	augustus_masked-scf300000870753.0-processed-gene-15.15-mRNA-1	maker-scf300000870586.0-snap-gene-3.79-mRNA-1	augustus_masked-scf300000870753.0-processed-gene-13.35-mRNA-1	maker-scf300000870601.0-snap-gene-12.60-mRNA-1	augustus_masked-scf300000870749.0-processed-gene-3.99-mRNA-1	maker-scf300000870595.0-snap-gene-4.9-mRNA-1	augustus_masked-scf300000870753.0-processed-gene-23.16-mRNA-1	maker-deg300000870423-snap-gene-0.59-mRNA-1	maker-scf300000870601.0-snap-gene-4.0-mRNA-1	maker-scf300000870753.0-snap-gene-12.60-mRNA-1	augustus_masked-scf300000870752.0-processed-gene-0.14-mRNA-1	maker-scf300000870601.0-snap-gene-12.67-mRNA-1	maker-scf300000870595.0-snap-gene-3.67-mRNA-1	maker-scf300000870619.2-snap-gene-4.84-mRNA-1	augustus_masked-scf300000870746.0-processed-gene-6.25-mRNA-1	maker-scf300000870601.0-snap-gene-19.49-mRNA-1	maker-scf300000870586.0-snap-gene-4.105-mRNA-1	maker-scf300000870586.0-snap-gene-3.62-mRNA-1	maker-scf300000870586.0-snap-gene-4.134-mRNA-1	maker-scf300000870595.0-snap-gene-2.77-mRNA-1
	maker-scf300000870603.0-snap-gene-2.9-mRNA-1	maker-scf300000870607.0-snap-gene-0.0-mRNA-1	maker-scf300000870601.1-snap-gene-1.48-mRNA-1	maker-scf300000870641.0-snap-gene-2.123-mRNA-1	augustus_masked-scf300000870753.0-processed-gene-18.114-mRNA-1	maker-scf300000870586.0-snap-gene-3.82-mRNA-1	augustus_masked-scf300000870753.0-processed-gene-15.15-mRNA-1	maker-scf300000870601.0-snap-gene-13.14-mRNA-1	augustus_masked-scf300000870749.0-processed-gene-4.125-mRNA-1	maker-scf300000870595.0-snap-gene-6.211-mRNA-1	augustus_masked-scf300000870753.0-processed-gene-24.119-mRNA-1	maker-deg300000870423-snap-gene-0.7-mRNA-1	maker-scf300000870601.0-snap-gene-4.14-mRNA-1	maker-scf300000870753.0-snap-gene-12.62-mRNA-1	augustus_masked-scf300000870752.0-processed-gene-0.44-mRNA-1	maker-scf300000870601.0-snap-gene-12.70-mRNA-1	maker-scf300000870595.0-snap-gene-3.72-mRNA-1	maker-scf300000870626.0-snap-gene-0.55-mRNA-1	augustus_masked-scf300000870747.0-processed-gene-0.89-mRNA-1	maker-scf300000870601.0-snap-gene-19.9-mRNA-1	maker-scf300000870586.0-snap-gene-4.108-mRNA-1	maker-scf300000870586.0-snap-gene-4.109-mRNA-1	maker-scf300000870593.0-snap-gene-0.108-mRNA-1	maker-scf300000870595.0-snap-gene-2.79-mRNA-1
	maker-scf300000870603.0-snap-gene-3.86-mRNA-1	maker-scf300000870607.0-snap-gene-1.10-mRNA-1	maker-scf300000870601.1-snap-gene-1.58-mRNA-1	maker-scf300000870641.0-snap-gene-2.96-mRNA-1	augustus_masked-scf300000870753.0-processed-gene-18.116-mRNA-1	maker-scf300000870586.0-snap-gene-4.101-mRNA-1	augustus_masked-scf300000870753.0-processed-gene-16.129-mRNA-1	maker-scf300000870601.0-snap-gene-13.17-mRNA-1	augustus_masked-scf300000870749.1-processed-gene-0.42-mRNA-1	maker-scf300000870595.0-snap-gene-6.217-mRNA-1	augustus_masked-scf300000870753.0-processed-gene-7.27-mRNA-1	maker-deg300000870423-snap-gene-0.9-mRNA-1	maker-scf300000870601.0-snap-gene-4.27-mRNA-1	maker-scf300000870753.0-snap-gene-18.22-mRNA-1	augustus_masked-scf300000870752.0-processed-gene-0.47-mRNA-1	maker-scf300000870601.0-snap-gene-12.85-mRNA-1	maker-scf300000870595.0-snap-gene-4.0-mRNA-1	maker-scf300000870629.0-snap-gene-0.57-mRNA-1	augustus_masked-scf300000870749.0-processed-gene-1.49-mRNA-1	maker-scf300000870601.0-snap-gene-4.26-mRNA-1	maker-scf300000870586.0-snap-gene-4.117-mRNA-1	maker-scf300000870586.0-snap-gene-4.137-mRNA-1	maker-scf300000870593.0-snap-gene-1.109-mRNA-1	maker-scf300000870595.0-snap-gene-3.51-mRNA-1
	maker-scf300000870603.0-snap-gene-5.7-mRNA-1	maker-scf300000870611.0-snap-gene-0.140-mRNA-1	maker-scf300000870601.1-snap-gene-2.58-mRNA-1	maker-scf300000870641.1-snap-gene-0.28-mRNA-1	augustus_masked-scf300000870753.0-processed-gene-23.53-mRNA-1	maker-scf300000870586.0-snap-gene-4.107-mRNA-1	augustus_masked-scf300000870753.0-processed-gene-18.114-mRNA-1	maker-scf300000870601.0-snap-gene-13.18-mRNA-1	augustus_masked-scf300000870749.1-processed-gene-0.66-mRNA-1	maker-scf300000870595.0-snap-gene-6.221-mRNA-1	augustus_masked-scf300000870754.0-processed-gene-0.10-mRNA-1	maker-scf300000870586.0-snap-gene-0.56-mRNA-1	maker-scf300000870601.0-snap-gene-4.29-mRNA-1	maker-scf300000870753.0-snap-gene-24.52-mRNA-1	augustus_masked-scf300000870752.0-processed-gene-0.51-mRNA-1	maker-scf300000870601.0-snap-gene-13.5-mRNA-1	maker-scf300000870595.0-snap-gene-4.5-mRNA-1	maker-scf300000870629.0-snap-gene-2.50-mRNA-1	augustus_masked-scf300000870749.0-processed-gene-15.13-mRNA-1	maker-scf300000870601.0-snap-gene-4.27-mRNA-1	maker-scf300000870586.0-snap-gene-4.137-mRNA-1	maker-scf300000870593.0-snap-gene-0.113-mRNA-1	maker-scf300000870593.0-snap-gene-1.112-mRNA-1	maker-scf300000870595.0-snap-gene-3.69-mRNA-1
	maker-scf300000870603.0-snap-gene-6.54-mRNA-1	maker-scf300000870611.0-snap-gene-0.147-mRNA-1	maker-scf300000870601.1-snap-gene-3.59-mRNA-1	maker-scf300000870642.2-snap-gene-0.46-mRNA-1	augustus_masked-scf300000870753.0-processed-gene-26.31-mRNA-1	maker-scf300000870586.0-snap-gene-4.111-mRNA-1	augustus_masked-scf300000870753.0-processed-gene-21.49-mRNA-1	maker-scf300000870601.0-snap-gene-15.100-mRNA-1	augustus_masked-scf300000870750.0-processed-gene-3.35-mRNA-1	maker-scf300000870595.0-snap-gene-6.224-mRNA-1	augustus_masked-scf300000870754.0-processed-gene-11.119-mRNA-1	maker-scf300000870586.0-snap-gene-0.74-mRNA-1	maker-scf300000870601.0-snap-gene-5.92-mRNA-1	maker-scf300000870753.0-snap-gene-25.67-mRNA-1	augustus_masked-scf300000870752.0-processed-gene-1.25-mRNA-1	maker-scf300000870601.0-snap-gene-15.112-mRNA-1	maker-scf300000870595.0-snap-gene-6.216-mRNA-1	maker-scf300000870631.0-snap-gene-1.64-mRNA-1	augustus_masked-scf300000870749.0-processed-gene-18.16-mRNA-1	maker-scf300000870601.0-snap-gene-4.28-mRNA-1	maker-scf300000870593.0-snap-gene-0.101-mRNA-1	maker-scf300000870593.0-snap-gene-1.117-mRNA-1	maker-scf300000870593.0-snap-gene-1.115-mRNA-1	maker-scf300000870595.0-snap-gene-4.12-mRNA-1
	maker-scf300000870603.0-snap-gene-7.1-mRNA-1	maker-scf300000870613.1-snap-gene-0.129-mRNA-1	maker-scf300000870601.1-snap-gene-3.61-mRNA-1	maker-scf300000870651.1-augustus-gene-1.120-mRNA-1	augustus_masked-scf300000870754.0-processed-gene-1.146-mRNA-1	maker-scf300000870586.0-snap-gene-4.119-mRNA-1	augustus_masked-scf300000870753.0-processed-gene-23.31-mRNA-1	maker-scf300000870601.0-snap-gene-15.101-mRNA-1	augustus_masked-scf300000870752.0-processed-gene-1.45-mRNA-1	maker-scf300000870595.0-snap-gene-6.239-mRNA-1	augustus_masked-scf300000870754.0-processed-gene-11.149-mRNA-1	maker-scf300000870586.0-snap-gene-2.63-mRNA-1	maker-scf300000870601.0-snap-gene-6.65-mRNA-1	maker-scf300000870754.0-augustus-gene-6.54-mRNA-1	augustus_masked-scf300000870752.0-processed-gene-1.44-mRNA-1	maker-scf300000870601.0-snap-gene-15.114-mRNA-1	maker-scf300000870595.1-snap-gene-1.122-mRNA-1	maker-scf300000870631.0-snap-gene-3.74-mRNA-1	augustus_masked-scf300000870749.0-processed-gene-18.72-mRNA-1	maker-scf300000870601.0-snap-gene-4.29-mRNA-1	maker-scf300000870593.0-snap-gene-1.115-mRNA-1	maker-scf300000870593.0-snap-gene-2.61-mRNA-1	maker-scf300000870593.0-snap-gene-2.61-mRNA-1	maker-scf300000870595.0-snap-gene-4.16-mRNA-1
	maker-scf300000870605.0-snap-gene-0.156-mRNA-1	maker-scf300000870613.1-snap-gene-0.156-mRNA-1	maker-scf300000870601.1-snap-gene-3.67-mRNA-1	maker-scf300000870651.1-augustus-gene-2.52-mRNA-1	maker-deg300000870423-snap-gene-0.29-mRNA-1	maker-scf300000870586.0-snap-gene-4.120-mRNA-1	augustus_masked-scf300000870753.0-processed-gene-23.39-mRNA-1	maker-scf300000870601.0-snap-gene-15.111-mRNA-1	augustus_masked-scf300000870752.0-processed-gene-3.95-mRNA-1	maker-scf300000870595.1-snap-gene-0.108-mRNA-1	augustus_masked-scf300000870754.0-processed-gene-12.43-mRNA-1	maker-scf300000870586.0-snap-gene-3.60-mRNA-1	maker-scf300000870601.0-snap-gene-6.67-mRNA-1	maker-scf300000870754.0-snap-gene-0.103-mRNA-1	augustus_masked-scf300000870752.0-processed-gene-3.95-mRNA-1	maker-scf300000870601.0-snap-gene-17.76-mRNA-1	maker-scf300000870595.1-snap-gene-2.129-mRNA-1	maker-scf300000870631.0-snap-gene-5.108-mRNA-1	augustus_masked-scf300000870749.0-processed-gene-2.125-mRNA-1	maker-scf300000870601.0-snap-gene-6.51-mRNA-1	maker-scf300000870593.0-snap-gene-1.123-mRNA-1	maker-scf300000870593.0-snap-gene-4.68-mRNA-1	maker-scf300000870593.0-snap-gene-2.62-mRNA-1	maker-scf300000870595.0-snap-gene-6.216-mRNA-1
	maker-scf300000870607.0-snap-gene-0.5-mRNA-1	maker-scf300000870619.0-snap-gene-0.1-mRNA-1	maker-scf300000870601.1-snap-gene-3.70-mRNA-1	maker-scf300000870651.1-snap-gene-1.18-mRNA-1	maker-scf300000870586.0-snap-gene-0.68-mRNA-1	maker-scf300000870586.0-snap-gene-4.129-mRNA-1	augustus_masked-scf300000870753.0-processed-gene-23.53-mRNA-1	maker-scf300000870601.0-snap-gene-18.66-mRNA-1	augustus_masked-scf300000870753.0-processed-gene-1.42-mRNA-1	maker-scf300000870595.1-snap-gene-1.126-mRNA-1	augustus_masked-scf300000870754.0-processed-gene-2.81-mRNA-1	maker-scf300000870586.0-snap-gene-3.74-mRNA-1	maker-scf300000870601.1-snap-gene-1.44-mRNA-1	maker-scf300000870754.0-snap-gene-0.95-mRNA-1	augustus_masked-scf300000870752.0-processed-gene-4.17-mRNA-1	maker-scf300000870601.0-snap-gene-18.63-mRNA-1	maker-scf300000870599.0-augustus-gene-1.126-mRNA-1	maker-scf300000870631.0-snap-gene-5.113-mRNA-1	augustus_masked-scf300000870749.0-processed-gene-6.85-mRNA-1	maker-scf300000870601.0-snap-gene-6.56-mRNA-1	maker-scf300000870593.0-snap-gene-2.62-mRNA-1	maker-scf300000870593.0-snap-gene-5.122-mRNA-1	maker-scf300000870593.0-snap-gene-4.68-mRNA-1	maker-scf300000870595.1-snap-gene-0.102-mRNA-1
	maker-scf300000870607.0-snap-gene-1.28-mRNA-1	maker-scf300000870619.2-snap-gene-1.61-mRNA-1	maker-scf300000870601.1-snap-gene-4.121-mRNA-1	maker-scf300000870651.1-snap-gene-3.67-mRNA-1	maker-scf300000870586.0-snap-gene-1.65-mRNA-1	maker-scf300000870586.0-snap-gene-4.141-mRNA-1	augustus_masked-scf300000870753.0-processed-gene-26.31-mRNA-1	maker-scf300000870601.0-snap-gene-2.112-mRNA-1	augustus_masked-scf300000870753.0-processed-gene-15.14-mRNA-1	maker-scf300000870595.1-snap-gene-1.136-mRNA-1	augustus_masked-scf300000870754.0-processed-gene-6.30-mRNA-1	maker-scf300000870586.0-snap-gene-3.82-mRNA-1	maker-scf300000870601.1-snap-gene-1.59-mRNA-1	maker-scf300000870754.0-snap-gene-4.45-mRNA-1	augustus_masked-scf300000870752.0-processed-gene-5.101-mRNA-1	maker-scf300000870601.0-snap-gene-18.71-mRNA-1	maker-scf300000870599.0-snap-gene-1.183-mRNA-1	maker-scf300000870635.0-snap-gene-0.172-mRNA-1	augustus_masked-scf300000870749.1-processed-gene-0.103-mRNA-1	maker-scf300000870601.0-snap-gene-7.118-mRNA-1	maker-scf300000870593.0-snap-gene-3.53-mRNA-1	maker-scf300000870593.0-snap-gene-6.63-mRNA-1	maker-scf300000870593.0-snap-gene-4.81-mRNA-1	maker-scf300000870595.1-snap-gene-1.122-mRNA-1
	maker-scf300000870613.1-snap-gene-0.119-mRNA-1	maker-scf300000870619.2-snap-gene-1.63-mRNA-1	maker-scf300000870601.1-snap-gene-6.120-mRNA-1	maker-scf300000870651.1-snap-gene-6.100-mRNA-1	maker-scf300000870586.0-snap-gene-1.73-mRNA-1	maker-scf300000870586.0-snap-gene-4.144-mRNA-1	augustus_masked-scf300000870753.0-processed-gene-5.11-mRNA-1	maker-scf300000870601.0-snap-gene-2.123-mRNA-1	augustus_masked-scf300000870753.0-processed-gene-16.129-mRNA-1	maker-scf300000870595.1-snap-gene-2.115-mRNA-1	augustus_masked-scf300000870754.0-processed-gene-7.32-mRNA-1	maker-scf300000870586.0-snap-gene-4.111-mRNA-1	maker-scf300000870601.1-snap-gene-2.48-mRNA-1	maker-scf300000870754.0-snap-gene-5.118-mRNA-1	augustus_masked-scf300000870752.0-processed-gene-5.104-mRNA-1	maker-scf300000870601.0-snap-gene-19.9-mRNA-1	maker-scf300000870599.0-snap-gene-1.192-mRNA-1	maker-scf300000870635.0-snap-gene-0.179-mRNA-1	augustus_masked-scf300000870752.0-processed-gene-0.12-mRNA-1	maker-scf300000870601.0-snap-gene-8.118-mRNA-1	maker-scf300000870593.0-snap-gene-4.58-mRNA-1	maker-scf300000870593.0-snap-gene-7.101-mRNA-1	maker-scf300000870593.0-snap-gene-4.82-mRNA-1	maker-scf300000870595.1-snap-gene-1.128-mRNA-1
	maker-scf300000870613.1-snap-gene-0.124-mRNA-1	maker-scf300000870619.2-snap-gene-2.20-mRNA-1	maker-scf300000870601.1-snap-gene-6.122-mRNA-1	maker-scf300000870651.1-snap-gene-6.112-mRNA-1	maker-scf300000870586.0-snap-gene-1.79-mRNA-1	maker-scf300000870593.0-snap-gene-1.114-mRNA-1	augustus_masked-scf300000870753.0-processed-gene-6.98-mRNA-1	maker-scf300000870601.0-snap-gene-4.2-mRNA-1	augustus_masked-scf300000870753.0-processed-gene-21.49-mRNA-1	maker-scf300000870599.0-snap-gene-1.149-mRNA-1	maker-deg300000870423-snap-gene-0.26-mRNA-1	maker-scf300000870586.0-snap-gene-4.119-mRNA-1	maker-scf300000870601.1-snap-gene-2.52-mRNA-1	maker-scf300000870754.0-snap-gene-5.126-mRNA-1	augustus_masked-scf300000870753.0-processed-gene-0.35-mRNA-1	maker-scf300000870601.0-snap-gene-2.115-mRNA-1	maker-scf300000870601.0-augustus-gene-10.45-mRNA-1	maker-scf300000870641.0-snap-gene-1.37-mRNA-1	augustus_masked-scf300000870752.0-processed-gene-0.14-mRNA-1	maker-scf300000870601.1-snap-gene-0.53-mRNA-1	maker-scf300000870593.0-snap-gene-4.65-mRNA-1	maker-scf300000870593.0-snap-gene-7.125-mRNA-1	maker-scf300000870593.0-snap-gene-4.87-mRNA-1	maker-scf300000870595.1-snap-gene-1.140-mRNA-1
	maker-scf300000870614.0-snap-gene-0.4-mRNA-1	maker-scf300000870629.0-snap-gene-3.50-mRNA-1	maker-scf300000870603.0-augustus-gene-8.83-mRNA-1	maker-scf300000870651.1-snap-gene-6.124-mRNA-1	maker-scf300000870586.0-snap-gene-2.54-mRNA-1	maker-scf300000870593.0-snap-gene-2.50-mRNA-1	augustus_masked-scf300000870753.0-processed-gene-8.42-mRNA-1	maker-scf300000870601.0-snap-gene-5.88-mRNA-1	augustus_masked-scf300000870753.0-processed-gene-23.16-mRNA-1	maker-scf300000870599.0-snap-gene-1.164-mRNA-1	maker-deg300000870423-snap-gene-0.28-mRNA-1	maker-scf300000870586.0-snap-gene-4.120-mRNA-1	maker-scf300000870601.1-snap-gene-3.54-mRNA-1	maker-scf300000870754.0-snap-gene-5.98-mRNA-1	augustus_masked-scf300000870753.0-processed-gene-10.106-mRNA-1	maker-scf300000870601.0-snap-gene-3.71-mRNA-1	maker-scf300000870601.0-augustus-gene-8.14-mRNA-1	maker-scf300000870641.0-snap-gene-1.7-mRNA-1	augustus_masked-scf300000870752.0-processed-gene-0.35-mRNA-1	maker-scf300000870601.1-snap-gene-1.44-mRNA-1	maker-scf300000870593.0-snap-gene-4.68-mRNA-1	maker-scf300000870595.0-augustus-gene-5.1-mRNA-1	maker-scf300000870593.0-snap-gene-4.91-mRNA-1	maker-scf300000870595.1-snap-gene-2.117-mRNA-1
	maker-scf300000870619.2-snap-gene-1.62-mRNA-1	maker-scf300000870631.0-snap-gene-1.68-mRNA-1	maker-scf300000870603.0-snap-gene-1.119-mRNA-1	maker-scf300000870651.1-snap-gene-6.94-mRNA-1	maker-scf300000870586.0-snap-gene-2.61-mRNA-1	maker-scf300000870593.0-snap-gene-3.70-mRNA-1	augustus_masked-scf300000870754.0-processed-gene-12.45-mRNA-1	maker-scf300000870601.0-snap-gene-6.68-mRNA-1	augustus_masked-scf300000870753.0-processed-gene-7.27-mRNA-1	maker-scf300000870601.0-snap-gene-1.55-mRNA-1	maker-deg300000870423-snap-gene-0.30-mRNA-1	maker-scf300000870586.0-snap-gene-4.129-mRNA-1	maker-scf300000870601.1-snap-gene-5.0-mRNA-1	maker-scf300000870754.0-snap-gene-6.77-mRNA-1	augustus_masked-scf300000870753.0-processed-gene-10.119-mRNA-1	maker-scf300000870601.0-snap-gene-4.15-mRNA-1	maker-scf300000870601.0-snap-gene-10.121-mRNA-1	maker-scf300000870641.0-snap-gene-2.104-mRNA-1	augustus_masked-scf300000870752.0-processed-gene-0.47-mRNA-1	maker-scf300000870601.1-snap-gene-4.123-mRNA-1	maker-scf300000870593.0-snap-gene-4.69-mRNA-1	maker-scf300000870595.0-snap-gene-0.18-mRNA-1	maker-scf300000870593.0-snap-gene-7.118-mRNA-1	maker-scf300000870595.1-snap-gene-2.122-mRNA-1
	maker-scf300000870619.2-snap-gene-1.70-mRNA-1	maker-scf300000870631.0-snap-gene-3.74-mRNA-1	maker-scf300000870603.0-snap-gene-11.63-mRNA-1	maker-scf300000870662.0-snap-gene-2.132-mRNA-1	maker-scf300000870586.0-snap-gene-3.63-mRNA-1	maker-scf300000870593.0-snap-gene-4.66-mRNA-1	augustus_masked-scf300000870754.0-processed-gene-6.13-mRNA-1	maker-scf300000870601.0-snap-gene-6.70-mRNA-1	augustus_masked-scf300000870754.0-processed-gene-0.10-mRNA-1	maker-scf300000870601.0-snap-gene-10.107-mRNA-1	maker-deg300000870423-snap-gene-0.33-mRNA-1	maker-scf300000870586.0-snap-gene-4.136-mRNA-1	maker-scf300000870603.0-augustus-gene-0.82-mRNA-1	maker-scf300000870754.0-snap-gene-8.46-mRNA-1	augustus_masked-scf300000870753.0-processed-gene-10.91-mRNA-1	maker-scf300000870601.0-snap-gene-5.104-mRNA-1	maker-scf300000870601.0-snap-gene-12.62-mRNA-1	maker-scf300000870641.1-snap-gene-0.9-mRNA-1	augustus_masked-scf300000870752.0-processed-gene-0.51-mRNA-1	maker-scf300000870601.1-snap-gene-4.145-mRNA-1	maker-scf300000870593.0-snap-gene-7.101-mRNA-1	maker-scf300000870595.0-snap-gene-2.66-mRNA-1	maker-scf300000870593.0-snap-gene-7.88-mRNA-1	maker-scf300000870595.1-snap-gene-2.141-mRNA-1
	maker-scf300000870619.2-snap-gene-2.20-mRNA-1	maker-scf300000870631.0-snap-gene-3.97-mRNA-1	maker-scf300000870603.0-snap-gene-11.64-mRNA-1	maker-scf300000870662.0-snap-gene-4.55-mRNA-1	maker-scf300000870586.0-snap-gene-4.100-mRNA-1	maker-scf300000870593.0-snap-gene-4.93-mRNA-1	augustus_masked-scf300000870754.0-processed-gene-8.118-mRNA-1	maker-scf300000870601.0-snap-gene-8.124-mRNA-1	augustus_masked-scf300000870754.0-processed-gene-11.119-mRNA-1	maker-scf300000870601.0-snap-gene-10.113-mRNA-1	maker-deg300000870423-snap-gene-0.34-mRNA-1	maker-scf300000870586.0-snap-gene-4.141-mRNA-1	maker-scf300000870603.0-snap-gene-10.17-mRNA-1	maker-scf300000870754.0-snap-gene-8.58-mRNA-1	augustus_masked-scf300000870753.0-processed-gene-11.1-mRNA-1	maker-scf300000870601.0-snap-gene-5.96-mRNA-1	maker-scf300000870601.0-snap-gene-12.81-mRNA-1	maker-scf300000870642.2-snap-gene-0.46-mRNA-1	augustus_masked-scf300000870752.0-processed-gene-1.25-mRNA-1	maker-scf300000870603.0-snap-gene-10.17-mRNA-1	maker-scf300000870593.0-snap-gene-7.116-mRNA-1	maker-scf300000870595.0-snap-gene-2.71-mRNA-1	maker-scf300000870595.0-augustus-gene-4.121-mRNA-1	maker-scf300000870599.0-augustus-gene-1.126-mRNA-1
	maker-scf300000870631.0-snap-gene-0.128-mRNA-1	maker-scf300000870631.0-snap-gene-4.55-mRNA-1	maker-scf300000870603.0-snap-gene-12.126-mRNA-1	maker-scf300000870662.0-snap-gene-5.113-mRNA-1	maker-scf300000870586.0-snap-gene-4.101-mRNA-1	maker-scf300000870593.0-snap-gene-5.111-mRNA-1	maker-deg300000870423-snap-gene-0.1-mRNA-1	maker-scf300000870601.0-snap-gene-8.131-mRNA-1	augustus_masked-scf300000870754.0-processed-gene-12.65-mRNA-1	maker-scf300000870601.0-snap-gene-10.116-mRNA-1	maker-deg300000870423-snap-gene-0.50-mRNA-1	maker-scf300000870586.0-snap-gene-4.145-mRNA-1	maker-scf300000870603.0-snap-gene-11.65-mRNA-1	snap_masked-scf300000870586.0-processed-gene-0.7-mRNA-1	augustus_masked-scf300000870753.0-processed-gene-11.18-mRNA-1	maker-scf300000870601.0-snap-gene-6.51-mRNA-1	maker-scf300000870601.0-snap-gene-15.102-mRNA-1	maker-scf300000870642.2-snap-gene-0.54-mRNA-1	augustus_masked-scf300000870752.0-processed-gene-1.44-mRNA-1	maker-scf300000870603.0-snap-gene-13.73-mRNA-1	maker-scf300000870593.0-snap-gene-7.118-mRNA-1	maker-scf300000870595.0-snap-gene-2.77-mRNA-1	maker-scf300000870595.0-augustus-gene-5.1-mRNA-1	maker-scf300000870599.0-snap-gene-0.85-mRNA-1
	maker-scf300000870631.0-snap-gene-3.76-mRNA-1	maker-scf300000870631.0-snap-gene-4.58-mRNA-1	maker-scf300000870603.0-snap-gene-12.145-mRNA-1	maker-scf300000870662.0-snap-gene-6.7-mRNA-1	maker-scf300000870586.0-snap-gene-4.105-mRNA-1	maker-scf300000870593.0-snap-gene-5.121-mRNA-1	maker-deg300000870423-snap-gene-0.13-mRNA-1	maker-scf300000870601.0-snap-gene-8.137-mRNA-1	augustus_masked-scf300000870754.0-processed-gene-6.30-mRNA-1	maker-scf300000870601.0-snap-gene-12.60-mRNA-1	maker-deg300000870423-snap-gene-0.51-mRNA-1	maker-scf300000870586.0-snap-gene-4.95-mRNA-1	maker-scf300000870603.0-snap-gene-12.115-mRNA-1	snap_masked-scf300000870586.0-processed-gene-2.108-mRNA-1	augustus_masked-scf300000870753.0-processed-gene-11.27-mRNA-1	maker-scf300000870601.0-snap-gene-7.118-mRNA-1	maker-scf300000870601.0-snap-gene-15.104-mRNA-1	maker-scf300000870651.1-snap-gene-0.59-mRNA-1	augustus_masked-scf300000870752.0-processed-gene-2.60-mRNA-1	maker-scf300000870603.0-snap-gene-16.68-mRNA-1	maker-scf300000870593.0-snap-gene-7.125-mRNA-1	maker-scf300000870595.0-snap-gene-2.79-mRNA-1	maker-scf300000870595.0-snap-gene-0.10-mRNA-1	maker-scf300000870599.0-snap-gene-1.141-mRNA-1
	maker-scf300000870631.0-snap-gene-3.81-mRNA-1	maker-scf300000870631.0-snap-gene-5.120-mRNA-1	maker-scf300000870603.0-snap-gene-12.151-mRNA-1	maker-scf300000870662.0-snap-gene-7.67-mRNA-1	maker-scf300000870586.0-snap-gene-4.108-mRNA-1	maker-scf300000870593.0-snap-gene-5.134-mRNA-1	maker-deg300000870423-snap-gene-0.15-mRNA-1	maker-scf300000870601.0-snap-gene-9.69-mRNA-1	maker-deg300000870423-snap-gene-0.2-mRNA-1	maker-scf300000870601.0-snap-gene-12.64-mRNA-1	maker-deg300000870423-snap-gene-0.52-mRNA-1	maker-scf300000870593.0-snap-gene-1.113-mRNA-1	maker-scf300000870603.0-snap-gene-12.129-mRNA-1	snap_masked-scf300000870593.0-processed-gene-4.43-mRNA-1	augustus_masked-scf300000870753.0-processed-gene-11.58-mRNA-1	maker-scf300000870601.0-snap-gene-7.125-mRNA-1	maker-scf300000870601.0-snap-gene-17.57-mRNA-1	maker-scf300000870651.1-snap-gene-0.61-mRNA-1	augustus_masked-scf300000870752.0-processed-gene-2.68-mRNA-1	maker-scf300000870603.0-snap-gene-18.102-mRNA-1	maker-scf300000870595.0-augustus-gene-5.1-mRNA-1	maker-scf300000870595.0-snap-gene-3.51-mRNA-1	maker-scf300000870595.0-snap-gene-3.63-mRNA-1	maker-scf300000870599.0-snap-gene-1.145-mRNA-1
	maker-scf300000870635.0-snap-gene-0.182-mRNA-1	maker-scf300000870631.0-snap-gene-5.99-mRNA-1	maker-scf300000870603.0-snap-gene-13.59-mRNA-1	maker-scf300000870662.0-snap-gene-7.80-mRNA-1	maker-scf300000870586.0-snap-gene-4.117-mRNA-1	maker-scf300000870593.0-snap-gene-5.139-mRNA-1	maker-deg300000870423-snap-gene-0.16-mRNA-1	maker-scf300000870601.1-snap-gene-0.67-mRNA-1	maker-deg300000870423-snap-gene-0.30-mRNA-1	maker-scf300000870601.0-snap-gene-12.70-mRNA-1	maker-deg300000870423-snap-gene-0.53-mRNA-1	maker-scf300000870593.0-snap-gene-2.49-mRNA-1	maker-scf300000870603.0-snap-gene-13.56-mRNA-1	snap_masked-scf300000870593.0-processed-gene-7.154-mRNA-1	augustus_masked-scf300000870753.0-processed-gene-18.116-mRNA-1	maker-scf300000870601.0-snap-gene-8.134-mRNA-1	maker-scf300000870601.0-snap-gene-17.60-mRNA-1	maker-scf300000870651.1-snap-gene-2.64-mRNA-1	augustus_masked-scf300000870752.0-processed-gene-3.95-mRNA-1	maker-scf300000870603.0-snap-gene-2.10-mRNA-1	maker-scf300000870595.0-snap-gene-0.18-mRNA-1	maker-scf300000870595.0-snap-gene-4.12-mRNA-1	maker-scf300000870595.0-snap-gene-4.32-mRNA-1	maker-scf300000870599.0-snap-gene-1.153-mRNA-1
	maker-scf300000870641.0-snap-gene-1.2-mRNA-1	maker-scf300000870641.0-snap-gene-2.113-mRNA-1	maker-scf300000870603.0-snap-gene-13.61-mRNA-1	maker-scf300000870662.0-snap-gene-7.82-mRNA-1	maker-scf300000870586.0-snap-gene-4.136-mRNA-1	maker-scf300000870593.0-snap-gene-6.63-mRNA-1	maker-deg300000870423-snap-gene-0.17-mRNA-1	maker-scf300000870601.1-snap-gene-1.57-mRNA-1	maker-deg300000870423-snap-gene-0.33-mRNA-1	maker-scf300000870601.0-snap-gene-12.73-mRNA-1	maker-deg300000870423-snap-gene-0.59-mRNA-1	maker-scf300000870593.0-snap-gene-2.56-mRNA-1	maker-scf300000870603.0-snap-gene-13.75-mRNA-1	snap_masked-scf300000870595.0-processed-gene-0.46-mRNA-1	augustus_masked-scf300000870753.0-processed-gene-21.18-mRNA-1	maker-scf300000870601.1-snap-gene-1.44-mRNA-1	maker-scf300000870601.0-snap-gene-17.76-mRNA-1	maker-scf300000870651.1-snap-gene-2.79-mRNA-1	augustus_masked-scf300000870752.0-processed-gene-5.104-mRNA-1	maker-scf300000870603.0-snap-gene-2.12-mRNA-1	maker-scf300000870595.0-snap-gene-1.50-mRNA-1	maker-scf300000870595.0-snap-gene-4.15-mRNA-1	maker-scf300000870595.0-snap-gene-6.213-mRNA-1	maker-scf300000870599.0-snap-gene-1.175-mRNA-1
	maker-scf300000870641.0-snap-gene-1.7-mRNA-1	maker-scf300000870641.0-snap-gene-2.122-mRNA-1	maker-scf300000870603.0-snap-gene-14.117-mRNA-1	maker-scf300000870662.0-snap-gene-7.84-mRNA-1	maker-scf300000870593.0-snap-gene-0.101-mRNA-1	maker-scf300000870593.0-snap-gene-6.83-mRNA-1	maker-deg300000870423-snap-gene-0.18-mRNA-1	maker-scf300000870601.1-snap-gene-2.46-mRNA-1	maker-deg300000870423-snap-gene-0.34-mRNA-1	maker-scf300000870601.0-snap-gene-12.85-mRNA-1	maker-deg300000870423-snap-gene-0.9-mRNA-1	maker-scf300000870593.0-snap-gene-3.54-mRNA-1	maker-scf300000870603.0-snap-gene-14.118-mRNA-1	snap_masked-scf300000870595.0-processed-gene-1.40-mRNA-1	augustus_masked-scf300000870753.0-processed-gene-23.16-mRNA-1	maker-scf300000870601.1-snap-gene-1.50-mRNA-1	maker-scf300000870601.0-snap-gene-17.78-mRNA-1	maker-scf300000870651.1-snap-gene-5.140-mRNA-1	augustus_masked-scf300000870752.1-processed-gene-1.61-mRNA-1	maker-scf300000870603.0-snap-gene-3.78-mRNA-1	maker-scf300000870595.0-snap-gene-1.56-mRNA-1	maker-scf300000870595.0-snap-gene-4.26-mRNA-1	maker-scf300000870595.0-snap-gene-6.216-mRNA-1	maker-scf300000870599.0-snap-gene-1.183-mRNA-1
	maker-scf300000870641.0-snap-gene-2.102-mRNA-1	maker-scf300000870641.0-snap-gene-2.123-mRNA-1	maker-scf300000870603.0-snap-gene-15.144-mRNA-1	maker-scf300000870662.0-snap-gene-9.74-mRNA-1	maker-scf300000870593.0-snap-gene-0.109-mRNA-1	maker-scf300000870593.0-snap-gene-7.90-mRNA-1	maker-deg300000870423-snap-gene-0.19-mRNA-1	maker-scf300000870601.1-snap-gene-3.55-mRNA-1	maker-deg300000870423-snap-gene-0.5-mRNA-1	maker-scf300000870601.0-snap-gene-12.87-mRNA-1	maker-scf300000870586.0-snap-gene-0.56-mRNA-1	maker-scf300000870593.0-snap-gene-3.55-mRNA-1	maker-scf300000870603.0-snap-gene-16.62-mRNA-1	snap_masked-scf300000870595.0-processed-gene-6.115-mRNA-1	augustus_masked-scf300000870753.0-processed-gene-24.115-mRNA-1	maker-scf300000870601.1-snap-gene-4.125-mRNA-1	maker-scf300000870601.0-snap-gene-19.10-mRNA-1	maker-scf300000870651.1-snap-gene-6.112-mRNA-1	augustus_masked-scf300000870753.0-processed-gene-1.49-mRNA-1	maker-scf300000870603.0-snap-gene-3.79-mRNA-1	maker-scf300000870595.0-snap-gene-1.57-mRNA-1	maker-scf300000870595.0-snap-gene-4.36-mRNA-1	maker-scf300000870595.0-snap-gene-6.232-mRNA-1	maker-scf300000870601.0-augustus-gene-5.38-mRNA-1
	maker-scf300000870641.0-snap-gene-2.94-mRNA-1	maker-scf300000870641.1-snap-gene-0.12-mRNA-1	maker-scf300000870603.0-snap-gene-2.10-mRNA-1	maker-scf300000870673.0-snap-gene-0.100-mRNA-1	maker-scf300000870593.0-snap-gene-1.114-mRNA-1	maker-scf300000870593.0-snap-gene-7.94-mRNA-1	maker-deg300000870423-snap-gene-0.2-mRNA-1	maker-scf300000870601.1-snap-gene-3.57-mRNA-1	maker-deg300000870423-snap-gene-0.50-mRNA-1	maker-scf300000870601.0-snap-gene-13.8-mRNA-1	maker-scf300000870586.0-snap-gene-0.59-mRNA-1	maker-scf300000870593.0-snap-gene-3.70-mRNA-1	maker-scf300000870603.0-snap-gene-17.19-mRNA-1	snap_masked-scf300000870599.0-processed-gene-1.234-mRNA-1	augustus_masked-scf300000870753.0-processed-gene-24.119-mRNA-1	maker-scf300000870601.1-snap-gene-4.135-mRNA-1	maker-scf300000870601.0-snap-gene-19.26-mRNA-1	maker-scf300000870651.1-snap-gene-6.125-mRNA-1	augustus_masked-scf300000870753.0-processed-gene-10.119-mRNA-1	maker-scf300000870603.0-snap-gene-5.19-mRNA-1	maker-scf300000870595.0-snap-gene-2.79-mRNA-1	maker-scf300000870595.0-snap-gene-5.49-mRNA-1	maker-scf300000870595.0-snap-gene-6.236-mRNA-1	maker-scf300000870601.0-snap-gene-10.103-mRNA-1
	maker-scf300000870641.1-snap-gene-0.21-mRNA-1	maker-scf300000870651.1-augustus-gene-2.52-mRNA-1	maker-scf300000870603.0-snap-gene-2.9-mRNA-1	maker-scf300000870673.2-snap-gene-1.51-mRNA-1	maker-scf300000870593.0-snap-gene-1.115-mRNA-1	maker-scf300000870595.0-augustus-gene-4.120-mRNA-1	maker-deg300000870423-snap-gene-0.20-mRNA-1	maker-scf300000870601.1-snap-gene-6.121-mRNA-1	maker-deg300000870423-snap-gene-0.51-mRNA-1	maker-scf300000870601.0-snap-gene-14.61-mRNA-1	maker-scf300000870586.0-snap-gene-0.73-mRNA-1	maker-scf300000870593.0-snap-gene-4.64-mRNA-1	maker-scf300000870603.0-snap-gene-2.11-mRNA-1	snap_masked-scf300000870601.0-processed-gene-0.20-mRNA-1	augustus_masked-scf300000870753.0-processed-gene-3.103-mRNA-1	maker-scf300000870601.1-snap-gene-5.0-mRNA-1	maker-scf300000870601.0-snap-gene-19.7-mRNA-1	maker-scf300000870662.0-snap-gene-0.4-mRNA-1	augustus_masked-scf300000870753.0-processed-gene-10.83-mRNA-1	maker-scf300000870603.0-snap-gene-6.51-mRNA-1	maker-scf300000870595.0-snap-gene-3.58-mRNA-1	maker-scf300000870595.0-snap-gene-5.56-mRNA-1	maker-scf300000870595.1-snap-gene-0.102-mRNA-1	maker-scf300000870601.0-snap-gene-11.14-mRNA-1
	maker-scf300000870651.1-snap-gene-0.65-mRNA-1	maker-scf300000870651.1-snap-gene-3.53-mRNA-1	maker-scf300000870603.0-snap-gene-4.113-mRNA-1	maker-scf300000870673.2-snap-gene-1.52-mRNA-1	maker-scf300000870593.0-snap-gene-1.123-mRNA-1	maker-scf300000870595.0-snap-gene-0.12-mRNA-1	maker-deg300000870423-snap-gene-0.22-mRNA-1	maker-scf300000870601.1-snap-gene-6.145-mRNA-1	maker-deg300000870423-snap-gene-0.52-mRNA-1	maker-scf300000870601.0-snap-gene-17.75-mRNA-1	maker-scf300000870586.0-snap-gene-1.63-mRNA-1	maker-scf300000870593.0-snap-gene-4.76-mRNA-1	maker-scf300000870603.0-snap-gene-3.85-mRNA-1	snap_masked-scf300000870601.0-processed-gene-13.27-mRNA-1	augustus_masked-scf300000870754.0-processed-gene-0.10-mRNA-1	maker-scf300000870601.1-snap-gene-5.14-mRNA-1	maker-scf300000870601.0-snap-gene-19.9-mRNA-1	maker-scf300000870662.0-snap-gene-11.21-mRNA-1	augustus_masked-scf300000870753.0-processed-gene-10.88-mRNA-1	maker-scf300000870603.0-snap-gene-6.65-mRNA-1	maker-scf300000870595.0-snap-gene-4.12-mRNA-1	maker-scf300000870595.0-snap-gene-6.216-mRNA-1	maker-scf300000870595.1-snap-gene-1.128-mRNA-1	maker-scf300000870601.0-snap-gene-11.20-mRNA-1
	maker-scf300000870651.1-snap-gene-2.58-mRNA-1	maker-scf300000870651.1-snap-gene-3.58-mRNA-1	maker-scf300000870603.0-snap-gene-4.117-mRNA-1	maker-scf300000870673.2-snap-gene-1.53-mRNA-1	maker-scf300000870593.0-snap-gene-2.50-mRNA-1	maker-scf300000870595.0-snap-gene-2.73-mRNA-1	maker-deg300000870423-snap-gene-0.23-mRNA-1	maker-scf300000870603.0-augustus-gene-0.82-mRNA-1	maker-scf300000870586.0-snap-gene-0.56-mRNA-1	maker-scf300000870601.0-snap-gene-18.59-mRNA-1	maker-scf300000870586.0-snap-gene-1.71-mRNA-1	maker-scf300000870593.0-snap-gene-4.77-mRNA-1	maker-scf300000870603.0-snap-gene-5.19-mRNA-1	snap_masked-scf300000870601.0-processed-gene-5.72-mRNA-1	augustus_masked-scf300000870754.0-processed-gene-11.119-mRNA-1	maker-scf300000870601.1-snap-gene-6.104-mRNA-1	maker-scf300000870601.0-snap-gene-3.66-mRNA-1	maker-scf300000870662.0-snap-gene-4.55-mRNA-1	augustus_masked-scf300000870753.0-processed-gene-10.91-mRNA-1	maker-scf300000870603.0-snap-gene-7.2-mRNA-1	maker-scf300000870595.0-snap-gene-4.36-mRNA-1	maker-scf300000870595.0-snap-gene-6.229-mRNA-1	maker-scf300000870595.1-snap-gene-2.125-mRNA-1	maker-scf300000870601.0-snap-gene-11.22-mRNA-1
	maker-scf300000870651.1-snap-gene-3.67-mRNA-1	maker-scf300000870651.1-snap-gene-3.67-mRNA-1	maker-scf300000870603.0-snap-gene-5.13-mRNA-1	maker-scf300000870673.2-snap-gene-12.82-mRNA-1	maker-scf300000870593.0-snap-gene-2.53-mRNA-1	maker-scf300000870595.0-snap-gene-2.84-mRNA-1	maker-deg300000870423-snap-gene-0.25-mRNA-1	maker-scf300000870603.0-augustus-gene-14.10-mRNA-1	maker-scf300000870586.0-snap-gene-0.71-mRNA-1	maker-scf300000870601.0-snap-gene-19.33-mRNA-1	maker-scf300000870586.0-snap-gene-2.67-mRNA-1	maker-scf300000870593.0-snap-gene-5.112-mRNA-1	maker-scf300000870603.0-snap-gene-7.10-mRNA-1	snap_masked-scf300000870601.0-processed-gene-9.49-mRNA-1	augustus_masked-scf300000870754.0-processed-gene-11.149-mRNA-1	maker-scf300000870603.0-augustus-gene-2.101-mRNA-1	maker-scf300000870601.0-snap-gene-3.75-mRNA-1	maker-scf300000870662.0-snap-gene-5.145-mRNA-1	augustus_masked-scf300000870753.0-processed-gene-11.1-mRNA-1	maker-scf300000870603.0-snap-gene-8.15-mRNA-1	maker-scf300000870595.0-snap-gene-5.49-mRNA-1	maker-scf300000870595.0-snap-gene-6.233-mRNA-1	maker-scf300000870595.1-snap-gene-2.133-mRNA-1	maker-scf300000870601.0-snap-gene-11.31-mRNA-1
	maker-scf300000870651.1-snap-gene-4.86-mRNA-1	maker-scf300000870651.1-snap-gene-5.145-mRNA-1	maker-scf300000870603.0-snap-gene-6.54-mRNA-1	maker-scf300000870673.2-snap-gene-14.71-mRNA-1	maker-scf300000870593.0-snap-gene-2.56-mRNA-1	maker-scf300000870595.0-snap-gene-2.85-mRNA-1	maker-deg300000870423-snap-gene-0.29-mRNA-1	maker-scf300000870603.0-snap-gene-0.4-mRNA-1	maker-scf300000870586.0-snap-gene-2.53-mRNA-1	maker-scf300000870601.0-snap-gene-19.38-mRNA-1	maker-scf300000870586.0-snap-gene-3.60-mRNA-1	maker-scf300000870593.0-snap-gene-5.121-mRNA-1	maker-scf300000870603.0-snap-gene-8.10-mRNA-1	snap_masked-scf300000870601.1-processed-gene-5.27-mRNA-1	augustus_masked-scf300000870754.0-processed-gene-5.46-mRNA-1	maker-scf300000870603.0-snap-gene-12.140-mRNA-1	maker-scf300000870601.0-snap-gene-4.26-mRNA-1	maker-scf300000870662.0-snap-gene-8.0-mRNA-1	augustus_masked-scf300000870753.0-processed-gene-11.18-mRNA-1	maker-scf300000870603.0-snap-gene-8.35-mRNA-1	maker-scf300000870595.0-snap-gene-6.216-mRNA-1	maker-scf300000870595.0-snap-gene-6.236-mRNA-1	maker-scf300000870595.1-snap-gene-2.136-mRNA-1	maker-scf300000870601.0-snap-gene-12.62-mRNA-1
	maker-scf300000870651.1-snap-gene-5.138-mRNA-1	maker-scf300000870651.1-snap-gene-6.124-mRNA-1	maker-scf300000870603.0-snap-gene-8.4-mRNA-1	maker-scf300000870673.2-snap-gene-2.11-mRNA-1	maker-scf300000870593.0-snap-gene-3.71-mRNA-1	maker-scf300000870595.0-snap-gene-2.88-mRNA-1	maker-deg300000870423-snap-gene-0.30-mRNA-1	maker-scf300000870603.0-snap-gene-0.8-mRNA-1	maker-scf300000870586.0-snap-gene-2.63-mRNA-1	maker-scf300000870601.0-snap-gene-19.9-mRNA-1	maker-scf300000870586.0-snap-gene-3.70-mRNA-1	maker-scf300000870593.0-snap-gene-5.135-mRNA-1	maker-scf300000870603.0-snap-gene-8.16-mRNA-1	snap_masked-scf300000870601.1-processed-gene-6.218-mRNA-1	augustus_masked-scf300000870754.0-processed-gene-5.64-mRNA-1	maker-scf300000870603.0-snap-gene-13.73-mRNA-1	maker-scf300000870601.0-snap-gene-4.28-mRNA-1	maker-scf300000870662.0-snap-gene-8.1-mRNA-1	augustus_masked-scf300000870753.0-processed-gene-11.21-mRNA-1	maker-scf300000870603.0-snap-gene-8.5-mRNA-1	maker-scf300000870595.0-snap-gene-6.217-mRNA-1	maker-scf300000870595.1-snap-gene-2.117-mRNA-1	maker-scf300000870599.0-snap-gene-0.85-mRNA-1	maker-scf300000870601.0-snap-gene-12.66-mRNA-1
	maker-scf300000870651.1-snap-gene-6.123-mRNA-1	maker-scf300000870651.1-snap-gene-6.98-mRNA-1	maker-scf300000870603.1-snap-gene-0.80-mRNA-1	maker-scf300000870673.2-snap-gene-2.17-mRNA-1	maker-scf300000870593.0-snap-gene-4.53-mRNA-1	maker-scf300000870595.0-snap-gene-3.55-mRNA-1	maker-deg300000870423-snap-gene-0.56-mRNA-1	maker-scf300000870603.0-snap-gene-1.106-mRNA-1	maker-scf300000870586.0-snap-gene-3.60-mRNA-1	maker-scf300000870601.0-snap-gene-3.68-mRNA-1	maker-scf300000870586.0-snap-gene-3.74-mRNA-1	maker-scf300000870593.0-snap-gene-6.62-mRNA-1	maker-scf300000870603.0-snap-gene-8.17-mRNA-1	snap_masked-scf300000870603.0-processed-gene-0.29-mRNA-1	augustus_masked-scf300000870754.0-processed-gene-5.68-mRNA-1	maker-scf300000870603.0-snap-gene-14.130-mRNA-1	maker-scf300000870601.0-snap-gene-6.56-mRNA-1	maker-scf300000870662.0-snap-gene-8.3-mRNA-1	augustus_masked-scf300000870753.0-processed-gene-11.47-mRNA-1	maker-scf300000870603.0-snap-gene-9.117-mRNA-1	maker-scf300000870595.0-snap-gene-6.229-mRNA-1	maker-scf300000870595.1-snap-gene-2.119-mRNA-1	maker-scf300000870599.0-snap-gene-1.141-mRNA-1	maker-scf300000870601.0-snap-gene-12.89-mRNA-1
	maker-scf300000870662.0-snap-gene-0.4-mRNA-1	maker-scf300000870662.0-snap-gene-10.15-mRNA-1	maker-scf300000870605.0-snap-gene-0.119-mRNA-1	maker-scf300000870673.2-snap-gene-4.81-mRNA-1	maker-scf300000870593.0-snap-gene-4.58-mRNA-1	maker-scf300000870595.0-snap-gene-4.22-mRNA-1	maker-deg300000870423-snap-gene-0.58-mRNA-1	maker-scf300000870603.0-snap-gene-1.119-mRNA-1	maker-scf300000870586.0-snap-gene-3.79-mRNA-1	maker-scf300000870601.0-snap-gene-4.14-mRNA-1	maker-scf300000870586.0-snap-gene-4.107-mRNA-1	maker-scf300000870593.0-snap-gene-6.68-mRNA-1	maker-scf300000870603.0-snap-gene-8.25-mRNA-1	snap_masked-scf300000870603.0-processed-gene-10.45-mRNA-1	augustus_masked-scf300000870754.0-processed-gene-6.0-mRNA-1	maker-scf300000870603.0-snap-gene-16.68-mRNA-1	maker-scf300000870601.0-snap-gene-6.62-mRNA-1	maker-scf300000870673.1-snap-gene-0.15-mRNA-1	augustus_masked-scf300000870753.0-processed-gene-12.4-mRNA-1	maker-scf300000870603.0-snap-gene-9.130-mRNA-1	maker-scf300000870595.0-snap-gene-6.232-mRNA-1	maker-scf300000870595.1-snap-gene-2.121-mRNA-1	maker-scf300000870599.0-snap-gene-1.145-mRNA-1	maker-scf300000870601.0-snap-gene-13.1-mRNA-1
	maker-scf300000870662.0-snap-gene-0.6-mRNA-1	maker-scf300000870662.0-snap-gene-10.5-mRNA-1	maker-scf300000870607.1-snap-gene-0.3-mRNA-1	maker-scf300000870673.2-snap-gene-5.62-mRNA-1	maker-scf300000870593.0-snap-gene-4.65-mRNA-1	maker-scf300000870595.0-snap-gene-5.48-mRNA-1	maker-deg300000870423-snap-gene-0.7-mRNA-1	maker-scf300000870603.0-snap-gene-11.63-mRNA-1	maker-scf300000870586.0-snap-gene-3.80-mRNA-1	maker-scf300000870601.0-snap-gene-6.51-mRNA-1	maker-scf300000870586.0-snap-gene-4.119-mRNA-1	maker-scf300000870593.0-snap-gene-6.83-mRNA-1	maker-scf300000870603.0-snap-gene-8.34-mRNA-1	snap_masked-scf300000870603.0-processed-gene-18.78-mRNA-1	augustus_masked-scf300000870754.0-processed-gene-6.3-mRNA-1	maker-scf300000870603.0-snap-gene-17.14-mRNA-1	maker-scf300000870601.0-snap-gene-6.65-mRNA-1	maker-scf300000870673.1-snap-gene-0.18-mRNA-1	augustus_masked-scf300000870753.0-processed-gene-14.113-mRNA-1	maker-scf300000870603.0-snap-gene-9.137-mRNA-1	maker-scf300000870595.0-snap-gene-6.236-mRNA-1	maker-scf300000870595.1-snap-gene-2.122-mRNA-1	maker-scf300000870599.0-snap-gene-1.149-mRNA-1	maker-scf300000870601.0-snap-gene-13.18-mRNA-1
	maker-scf300000870662.0-snap-gene-10.10-mRNA-1	maker-scf300000870662.0-snap-gene-11.18-mRNA-1	maker-scf300000870611.0-snap-gene-0.130-mRNA-1	maker-scf300000870673.2-snap-gene-5.78-mRNA-1	maker-scf300000870593.0-snap-gene-4.66-mRNA-1	maker-scf300000870595.0-snap-gene-5.56-mRNA-1	maker-deg300000870423-snap-gene-0.9-mRNA-1	maker-scf300000870603.0-snap-gene-12.126-mRNA-1	maker-scf300000870586.0-snap-gene-4.107-mRNA-1	maker-scf300000870601.0-snap-gene-6.53-mRNA-1	maker-scf300000870586.0-snap-gene-4.120-mRNA-1	maker-scf300000870593.0-snap-gene-7.109-mRNA-1	maker-scf300000870603.0-snap-gene-9.117-mRNA-1	snap_masked-scf300000870603.1-processed-gene-0.39-mRNA-1	augustus_masked-scf300000870754.0-processed-gene-7.19-mRNA-1	maker-scf300000870603.0-snap-gene-18.113-mRNA-1	maker-scf300000870601.0-snap-gene-7.126-mRNA-1	maker-scf300000870673.1-snap-gene-1.203-mRNA-1	augustus_masked-scf300000870753.0-processed-gene-15.50-mRNA-1	maker-scf300000870603.0-snap-gene-9.142-mRNA-1	maker-scf300000870595.1-augustus-gene-0.46-mRNA-1	maker-scf300000870595.1-snap-gene-2.141-mRNA-1	maker-scf300000870599.0-snap-gene-1.187-mRNA-1	maker-scf300000870601.0-snap-gene-13.21-mRNA-1
	maker-scf300000870662.0-snap-gene-12.86-mRNA-1	maker-scf300000870662.0-snap-gene-3.78-mRNA-1	maker-scf300000870611.0-snap-gene-0.132-mRNA-1	maker-scf300000870673.2-snap-gene-6.112-mRNA-1	maker-scf300000870593.0-snap-gene-4.87-mRNA-1	maker-scf300000870595.0-snap-gene-6.214-mRNA-1	maker-scf300000870586.0-snap-gene-0.56-mRNA-1	maker-scf300000870603.0-snap-gene-12.152-mRNA-1	maker-scf300000870586.0-snap-gene-4.111-mRNA-1	maker-scf300000870601.0-snap-gene-6.67-mRNA-1	maker-scf300000870586.0-snap-gene-4.141-mRNA-1	maker-scf300000870595.0-augustus-gene-2.143-mRNA-1	maker-scf300000870603.0-snap-gene-9.122-mRNA-1	snap_masked-scf300000870607.0-processed-gene-1.72-mRNA-1	augustus_masked-scf300000870754.0-processed-gene-7.32-mRNA-1	maker-scf300000870603.0-snap-gene-2.12-mRNA-1	maker-scf300000870601.1-snap-gene-0.59-mRNA-1	maker-scf300000870673.1-snap-gene-1.215-mRNA-1	augustus_masked-scf300000870753.0-processed-gene-18.131-mRNA-1	maker-scf300000870603.0-snap-gene-9.150-mRNA-1	maker-scf300000870595.1-snap-gene-0.102-mRNA-1	maker-scf300000870599.0-augustus-gene-1.126-mRNA-1	maker-scf300000870601.0-augustus-gene-5.38-mRNA-1	maker-scf300000870601.0-snap-gene-14.68-mRNA-1
	maker-scf300000870662.0-snap-gene-12.92-mRNA-1	maker-scf300000870662.0-snap-gene-3.82-mRNA-1	maker-scf300000870613.1-snap-gene-0.152-mRNA-1	maker-scf300000870673.2-snap-gene-7.71-mRNA-1	maker-scf300000870593.0-snap-gene-5.139-mRNA-1	maker-scf300000870595.0-snap-gene-6.237-mRNA-1	maker-scf300000870586.0-snap-gene-0.57-mRNA-1	maker-scf300000870603.0-snap-gene-13.56-mRNA-1	maker-scf300000870586.0-snap-gene-4.116-mRNA-1	maker-scf300000870601.0-snap-gene-7.115-mRNA-1	maker-scf300000870586.0-snap-gene-4.98-mRNA-1	maker-scf300000870595.0-augustus-gene-4.120-mRNA-1	maker-scf300000870603.0-snap-gene-9.128-mRNA-1	snap_masked-scf300000870613.1-processed-gene-0.229-mRNA-1	augustus_masked-scf300000870754.0-processed-gene-8.108-mRNA-1	maker-scf300000870603.0-snap-gene-3.79-mRNA-1	maker-scf300000870601.1-snap-gene-1.42-mRNA-1	maker-scf300000870673.2-snap-gene-0.1-mRNA-1	augustus_masked-scf300000870753.0-processed-gene-21.18-mRNA-1	maker-scf300000870605.0-snap-gene-0.139-mRNA-1	maker-scf300000870595.1-snap-gene-2.116-mRNA-1	maker-scf300000870599.0-snap-gene-0.82-mRNA-1	maker-scf300000870601.0-augustus-gene-6.83-mRNA-1	maker-scf300000870601.0-snap-gene-14.75-mRNA-1
	maker-scf300000870662.0-snap-gene-4.74-mRNA-1	maker-scf300000870662.0-snap-gene-5.113-mRNA-1	maker-scf300000870613.1-snap-gene-0.156-mRNA-1	maker-scf300000870673.2-snap-gene-8.105-mRNA-1	maker-scf300000870593.0-snap-gene-6.60-mRNA-1	maker-scf300000870595.1-snap-gene-0.101-mRNA-1	maker-scf300000870586.0-snap-gene-0.71-mRNA-1	maker-scf300000870603.0-snap-gene-13.61-mRNA-1	maker-scf300000870586.0-snap-gene-4.119-mRNA-1	maker-scf300000870601.0-snap-gene-7.117-mRNA-1	maker-scf300000870593.0-augustus-gene-0.3-mRNA-1	maker-scf300000870595.0-snap-gene-0.12-mRNA-1	maker-scf300000870603.0-snap-gene-9.130-mRNA-1	snap_masked-scf300000870619.2-processed-gene-1.22-mRNA-1	augustus_masked-scf300000870754.0-processed-gene-8.88-mRNA-1	maker-scf300000870603.0-snap-gene-6.58-mRNA-1	maker-scf300000870601.1-snap-gene-1.44-mRNA-1	maker-scf300000870673.2-snap-gene-12.87-mRNA-1	augustus_masked-scf300000870753.0-processed-gene-23.16-mRNA-1	maker-scf300000870607.0-snap-gene-0.0-mRNA-1	maker-scf300000870595.1-snap-gene-2.119-mRNA-1	maker-scf300000870599.0-snap-gene-1.141-mRNA-1	maker-scf300000870601.0-snap-gene-10.110-mRNA-1	maker-scf300000870601.0-snap-gene-14.83-mRNA-1
	maker-scf300000870662.0-snap-gene-5.133-mRNA-1	maker-scf300000870662.0-snap-gene-5.145-mRNA-1	maker-scf300000870619.2-snap-gene-0.63-mRNA-1	maker-scf300000870673.2-snap-gene-8.96-mRNA-1	maker-scf300000870593.0-snap-gene-6.68-mRNA-1	maker-scf300000870595.1-snap-gene-1.123-mRNA-1	maker-scf300000870586.0-snap-gene-0.75-mRNA-1	maker-scf300000870603.0-snap-gene-14.117-mRNA-1	maker-scf300000870586.0-snap-gene-4.120-mRNA-1	maker-scf300000870601.0-snap-gene-7.118-mRNA-1	maker-scf300000870593.0-snap-gene-0.109-mRNA-1	maker-scf300000870595.0-snap-gene-0.4-mRNA-1	maker-scf300000870603.0-snap-gene-9.141-mRNA-1	snap_masked-scf300000870619.2-processed-gene-1.40-mRNA-1	augustus_masked-scf300000870754.0-processed-gene-8.93-mRNA-1	maker-scf300000870603.0-snap-gene-6.61-mRNA-1	maker-scf300000870601.1-snap-gene-1.48-mRNA-1	maker-scf300000870673.2-snap-gene-15.122-mRNA-1	augustus_masked-scf300000870753.0-processed-gene-24.115-mRNA-1	maker-scf300000870607.0-snap-gene-0.1-mRNA-1	maker-scf300000870599.0-snap-gene-0.82-mRNA-1	maker-scf300000870599.0-snap-gene-1.147-mRNA-1	maker-scf300000870601.0-snap-gene-10.118-mRNA-1	maker-scf300000870601.0-snap-gene-15.108-mRNA-1
	maker-scf300000870662.0-snap-gene-7.69-mRNA-1	maker-scf300000870662.0-snap-gene-6.2-mRNA-1	maker-scf300000870619.2-snap-gene-1.61-mRNA-1	maker-scf300000870673.2-snap-gene-9.110-mRNA-1	maker-scf300000870593.0-snap-gene-7.102-mRNA-1	maker-scf300000870595.1-snap-gene-1.131-mRNA-1	maker-scf300000870586.0-snap-gene-1.78-mRNA-1	maker-scf300000870603.0-snap-gene-14.131-mRNA-1	maker-scf300000870586.0-snap-gene-4.129-mRNA-1	maker-scf300000870601.0-snap-gene-7.125-mRNA-1	maker-scf300000870593.0-snap-gene-1.113-mRNA-1	maker-scf300000870595.0-snap-gene-3.72-mRNA-1	maker-scf300000870603.0-snap-gene-9.148-mRNA-1	snap_masked-scf300000870629.0-processed-gene-0.90-mRNA-1	maker-scf300000870586.0-snap-gene-0.59-mRNA-1	maker-scf300000870603.0-snap-gene-7.1-mRNA-1	maker-scf300000870601.1-snap-gene-3.54-mRNA-1	maker-scf300000870673.2-snap-gene-2.17-mRNA-1	augustus_masked-scf300000870753.0-processed-gene-24.119-mRNA-1	maker-scf300000870607.0-snap-gene-0.12-mRNA-1	maker-scf300000870599.0-snap-gene-1.141-mRNA-1	maker-scf300000870599.0-snap-gene-1.153-mRNA-1	maker-scf300000870601.0-snap-gene-11.14-mRNA-1	maker-scf300000870601.0-snap-gene-15.111-mRNA-1
	maker-scf300000870662.0-snap-gene-7.84-mRNA-1	maker-scf300000870662.0-snap-gene-7.67-mRNA-1	maker-scf300000870619.2-snap-gene-2.10-mRNA-1	maker-scf300000870681.0-snap-gene-0.57-mRNA-1	maker-scf300000870593.0-snap-gene-7.116-mRNA-1	maker-scf300000870595.1-snap-gene-2.117-mRNA-1	maker-scf300000870586.0-snap-gene-1.79-mRNA-1	maker-scf300000870603.0-snap-gene-16.80-mRNA-1	maker-scf300000870586.0-snap-gene-4.141-mRNA-1	maker-scf300000870601.0-snap-gene-8.118-mRNA-1	maker-scf300000870593.0-snap-gene-1.116-mRNA-1	maker-scf300000870595.0-snap-gene-4.10-mRNA-1	maker-scf300000870607.0-snap-gene-1.10-mRNA-1	snap_masked-scf300000870629.0-processed-gene-2.82-mRNA-1	maker-scf300000870586.0-snap-gene-1.72-mRNA-1	maker-scf300000870603.0-snap-gene-7.2-mRNA-1	maker-scf300000870601.1-snap-gene-3.72-mRNA-1	maker-scf300000870673.2-snap-gene-4.75-mRNA-1	augustus_masked-scf300000870753.0-processed-gene-7.2-mRNA-1	maker-scf300000870607.0-snap-gene-1.10-mRNA-1	maker-scf300000870599.0-snap-gene-1.145-mRNA-1	maker-scf300000870599.0-snap-gene-1.183-mRNA-1	maker-scf300000870601.0-snap-gene-11.22-mRNA-1	maker-scf300000870601.0-snap-gene-16.115-mRNA-1
	maker-scf300000870673.1-snap-gene-1.196-mRNA-1	maker-scf300000870662.0-snap-gene-7.76-mRNA-1	maker-scf300000870619.2-snap-gene-4.82-mRNA-1	maker-scf300000870693.1-augustus-gene-4.222-mRNA-1	maker-scf300000870593.0-snap-gene-7.118-mRNA-1	maker-scf300000870595.1-snap-gene-2.122-mRNA-1	maker-scf300000870586.0-snap-gene-2.51-mRNA-1	maker-scf300000870603.0-snap-gene-16.82-mRNA-1	maker-scf300000870593.0-augustus-gene-0.3-mRNA-1	maker-scf300000870601.0-snap-gene-8.120-mRNA-1	maker-scf300000870593.0-snap-gene-1.125-mRNA-1	maker-scf300000870595.0-snap-gene-4.24-mRNA-1	maker-scf300000870611.0-snap-gene-0.131-mRNA-1	snap_masked-scf300000870629.0-processed-gene-3.8-mRNA-1	maker-scf300000870586.0-snap-gene-2.61-mRNA-1	maker-scf300000870603.0-snap-gene-7.6-mRNA-1	maker-scf300000870601.1-snap-gene-5.4-mRNA-1	maker-scf300000870673.2-snap-gene-5.65-mRNA-1	augustus_masked-scf300000870753.0-processed-gene-8.55-mRNA-1	maker-scf300000870613.1-snap-gene-0.124-mRNA-1	maker-scf300000870599.0-snap-gene-1.147-mRNA-1	maker-scf300000870599.0-snap-gene-1.187-mRNA-1	maker-scf300000870601.0-snap-gene-11.31-mRNA-1	maker-scf300000870601.0-snap-gene-17.74-mRNA-1
	maker-scf300000870673.2-snap-gene-1.52-mRNA-1	maker-scf300000870662.0-snap-gene-7.80-mRNA-1	maker-scf300000870621.0-snap-gene-0.3-mRNA-1	maker-scf300000870693.1-snap-gene-0.52-mRNA-1	maker-scf300000870593.0-snap-gene-7.129-mRNA-1	maker-scf300000870595.1-snap-gene-2.148-mRNA-1	maker-scf300000870586.0-snap-gene-2.55-mRNA-1	maker-scf300000870603.0-snap-gene-17.0-mRNA-1	maker-scf300000870593.0-snap-gene-0.105-mRNA-1	maker-scf300000870601.1-snap-gene-3.67-mRNA-1	maker-scf300000870593.0-snap-gene-2.49-mRNA-1	maker-scf300000870595.0-snap-gene-4.32-mRNA-1	maker-scf300000870613.1-snap-gene-0.134-mRNA-1	snap_masked-scf300000870631.0-processed-gene-1.25-mRNA-1	maker-scf300000870586.0-snap-gene-2.67-mRNA-1	maker-scf300000870603.0-snap-gene-8.15-mRNA-1	maker-scf300000870603.0-augustus-gene-8.73-mRNA-1	maker-scf300000870673.2-snap-gene-6.103-mRNA-1	augustus_masked-scf300000870753.0-processed-gene-9.23-mRNA-1	maker-scf300000870613.1-snap-gene-0.126-mRNA-1	maker-scf300000870599.0-snap-gene-1.148-mRNA-1	maker-scf300000870601.0-augustus-gene-6.83-mRNA-1	maker-scf300000870601.0-snap-gene-12.63-mRNA-1	maker-scf300000870601.0-snap-gene-19.43-mRNA-1
	maker-scf300000870673.2-snap-gene-12.74-mRNA-1	maker-scf300000870662.0-snap-gene-7.82-mRNA-1	maker-scf300000870626.0-snap-gene-0.61-mRNA-1	maker-scf300000870693.1-snap-gene-2.91-mRNA-1	maker-scf300000870593.0-snap-gene-7.88-mRNA-1	maker-scf300000870599.0-snap-gene-0.78-mRNA-1	maker-scf300000870586.0-snap-gene-2.61-mRNA-1	maker-scf300000870603.0-snap-gene-18.119-mRNA-1	maker-scf300000870593.0-snap-gene-1.116-mRNA-1	maker-scf300000870601.1-snap-gene-3.70-mRNA-1	maker-scf300000870593.0-snap-gene-3.54-mRNA-1	maker-scf300000870595.0-snap-gene-4.35-mRNA-1	maker-scf300000870613.1-snap-gene-0.148-mRNA-1	snap_masked-scf300000870631.0-processed-gene-5.180-mRNA-1	maker-scf300000870586.0-snap-gene-3.61-mRNA-1	maker-scf300000870603.0-snap-gene-8.33-mRNA-1	maker-scf300000870603.0-snap-gene-10.17-mRNA-1	maker-scf300000870673.2-snap-gene-7.54-mRNA-1	augustus_masked-scf300000870753.0-processed-gene-9.5-mRNA-1	maker-scf300000870613.1-snap-gene-0.136-mRNA-1	maker-scf300000870599.0-snap-gene-1.153-mRNA-1	maker-scf300000870601.0-snap-gene-11.14-mRNA-1	maker-scf300000870601.0-snap-gene-12.83-mRNA-1	maker-scf300000870601.0-snap-gene-2.106-mRNA-1
	maker-scf300000870673.2-snap-gene-12.77-mRNA-1	maker-scf300000870662.0-snap-gene-7.87-mRNA-1	maker-scf300000870629.0-snap-gene-0.61-mRNA-1	maker-scf300000870693.1-snap-gene-3.63-mRNA-1	maker-scf300000870593.0-snap-gene-7.90-mRNA-1	maker-scf300000870599.0-snap-gene-1.142-mRNA-1	maker-scf300000870586.0-snap-gene-2.63-mRNA-1	maker-scf300000870603.0-snap-gene-3.82-mRNA-1	maker-scf300000870593.0-snap-gene-1.125-mRNA-1	maker-scf300000870601.1-snap-gene-4.121-mRNA-1	maker-scf300000870593.0-snap-gene-3.56-mRNA-1	maker-scf300000870595.0-snap-gene-4.40-mRNA-1	maker-scf300000870619.2-augustus-gene-3.67-mRNA-1	snap_masked-scf300000870635.0-processed-gene-0.101-mRNA-1	maker-scf300000870586.0-snap-gene-3.70-mRNA-1	maker-scf300000870603.0-snap-gene-8.5-mRNA-1	maker-scf300000870603.0-snap-gene-10.30-mRNA-1	maker-scf300000870673.2-snap-gene-7.55-mRNA-1	augustus_masked-scf300000870754.0-processed-gene-0.10-mRNA-1	maker-scf300000870613.1-snap-gene-0.156-mRNA-1	maker-scf300000870599.0-snap-gene-1.167-mRNA-1	maker-scf300000870601.0-snap-gene-11.20-mRNA-1	maker-scf300000870601.0-snap-gene-12.85-mRNA-1	maker-scf300000870601.0-snap-gene-2.110-mRNA-1
	maker-scf300000870673.2-snap-gene-14.84-mRNA-1	maker-scf300000870662.0-snap-gene-9.74-mRNA-1	maker-scf300000870629.0-snap-gene-2.53-mRNA-1	maker-scf300000870693.1-snap-gene-4.63-mRNA-1	maker-scf300000870593.0-snap-gene-7.91-mRNA-1	maker-scf300000870599.0-snap-gene-1.149-mRNA-1	maker-scf300000870586.0-snap-gene-3.82-mRNA-1	maker-scf300000870603.0-snap-gene-3.87-mRNA-1	maker-scf300000870593.0-snap-gene-2.49-mRNA-1	maker-scf300000870601.1-snap-gene-4.125-mRNA-1	maker-scf300000870593.0-snap-gene-3.70-mRNA-1	maker-scf300000870595.0-snap-gene-4.9-mRNA-1	maker-scf300000870619.2-augustus-gene-3.92-mRNA-1	snap_masked-scf300000870641.0-processed-gene-0.35-mRNA-1	maker-scf300000870586.0-snap-gene-4.105-mRNA-1	maker-scf300000870603.0-snap-gene-9.123-mRNA-1	maker-scf300000870603.0-snap-gene-12.115-mRNA-1	maker-scf300000870673.2-snap-gene-8.104-mRNA-1	augustus_masked-scf300000870754.0-processed-gene-1.147-mRNA-1	maker-scf300000870619.2-snap-gene-1.53-mRNA-1	maker-scf300000870599.0-snap-gene-1.171-mRNA-1	maker-scf300000870601.0-snap-gene-11.22-mRNA-1	maker-scf300000870601.0-snap-gene-12.89-mRNA-1	maker-scf300000870601.0-snap-gene-3.66-mRNA-1
	maker-scf300000870673.2-snap-gene-14.92-mRNA-1	maker-scf300000870673.1-snap-gene-1.196-mRNA-1	maker-scf300000870629.0-snap-gene-5.13-mRNA-1	maker-scf300000870693.1-snap-gene-4.67-mRNA-1	maker-scf300000870595.0-augustus-gene-4.120-mRNA-1	maker-scf300000870599.0-snap-gene-1.160-mRNA-1	maker-scf300000870586.0-snap-gene-4.100-mRNA-1	maker-scf300000870603.0-snap-gene-5.13-mRNA-1	maker-scf300000870593.0-snap-gene-2.56-mRNA-1	maker-scf300000870601.1-snap-gene-4.150-mRNA-1	maker-scf300000870593.0-snap-gene-4.64-mRNA-1	maker-scf300000870595.0-snap-gene-6.211-mRNA-1	maker-scf300000870619.2-snap-gene-0.47-mRNA-1	snap_masked-scf300000870641.0-processed-gene-1.81-mRNA-1	maker-scf300000870586.0-snap-gene-4.114-mRNA-1	maker-scf300000870603.0-snap-gene-9.125-mRNA-1	maker-scf300000870603.0-snap-gene-12.145-mRNA-1	maker-scf300000870673.2-snap-gene-8.105-mRNA-1	augustus_masked-scf300000870754.0-processed-gene-11.119-mRNA-1	maker-scf300000870619.2-snap-gene-1.57-mRNA-1	maker-scf300000870599.0-snap-gene-1.187-mRNA-1	maker-scf300000870601.0-snap-gene-11.26-mRNA-1	maker-scf300000870601.0-snap-gene-13.21-mRNA-1	maker-scf300000870601.0-snap-gene-3.74-mRNA-1
	maker-scf300000870673.2-snap-gene-14.97-mRNA-1	maker-scf300000870673.2-snap-gene-0.10-mRNA-1	maker-scf300000870631.0-snap-gene-2.23-mRNA-1	maker-scf300000870735.0-snap-gene-1.18-mRNA-1	maker-scf300000870595.0-snap-gene-0.5-mRNA-1	maker-scf300000870599.0-snap-gene-1.188-mRNA-1	maker-scf300000870586.0-snap-gene-4.101-mRNA-1	maker-scf300000870603.0-snap-gene-6.54-mRNA-1	maker-scf300000870593.0-snap-gene-3.54-mRNA-1	maker-scf300000870601.1-snap-gene-5.12-mRNA-1	maker-scf300000870593.0-snap-gene-4.76-mRNA-1	maker-scf300000870595.0-snap-gene-6.220-mRNA-1	maker-scf300000870619.2-snap-gene-2.14-mRNA-1	snap_masked-scf300000870641.0-processed-gene-2.18-mRNA-1	maker-scf300000870586.0-snap-gene-4.136-mRNA-1	maker-scf300000870603.0-snap-gene-9.128-mRNA-1	maker-scf300000870603.0-snap-gene-13.56-mRNA-1	maker-scf300000870673.2-snap-gene-8.96-mRNA-1	augustus_masked-scf300000870754.0-processed-gene-11.149-mRNA-1	maker-scf300000870619.2-snap-gene-1.58-mRNA-1	maker-scf300000870601.0-augustus-gene-12.10-mRNA-1	maker-scf300000870601.0-snap-gene-11.31-mRNA-1	maker-scf300000870601.0-snap-gene-15.108-mRNA-1	maker-scf300000870601.0-snap-gene-4.10-mRNA-1
	maker-scf300000870673.2-snap-gene-2.20-mRNA-1	maker-scf300000870673.2-snap-gene-1.51-mRNA-1	maker-scf300000870631.0-snap-gene-3.80-mRNA-1	maker-scf300000870735.0-snap-gene-1.21-mRNA-1	maker-scf300000870595.0-snap-gene-1.45-mRNA-1	maker-scf300000870601.0-augustus-gene-5.38-mRNA-1	maker-scf300000870586.0-snap-gene-4.108-mRNA-1	maker-scf300000870603.0-snap-gene-8.2-mRNA-1	maker-scf300000870593.0-snap-gene-3.55-mRNA-1	maker-scf300000870601.1-snap-gene-6.126-mRNA-1	maker-scf300000870593.0-snap-gene-4.77-mRNA-1	maker-scf300000870595.0-snap-gene-6.221-mRNA-1	maker-scf300000870619.2-snap-gene-3.107-mRNA-1	snap_masked-scf300000870641.0-processed-gene-2.6-mRNA-1	maker-scf300000870593.0-snap-gene-0.101-mRNA-1	maker-scf300000870603.0-snap-gene-9.130-mRNA-1	maker-scf300000870603.0-snap-gene-13.75-mRNA-1	maker-scf300000870681.0-snap-gene-0.57-mRNA-1	augustus_masked-scf300000870754.0-processed-gene-5.37-mRNA-1	maker-scf300000870619.2-snap-gene-1.62-mRNA-1	maker-scf300000870601.0-augustus-gene-6.83-mRNA-1	maker-scf300000870601.0-snap-gene-12.62-mRNA-1	maker-scf300000870601.0-snap-gene-15.117-mRNA-1	maker-scf300000870601.0-snap-gene-4.11-mRNA-1
	maker-scf300000870673.2-snap-gene-2.26-mRNA-1	maker-scf300000870673.2-snap-gene-1.52-mRNA-1	maker-scf300000870631.0-snap-gene-4.54-mRNA-1	maker-scf300000870735.0-snap-gene-11.70-mRNA-1	maker-scf300000870595.0-snap-gene-1.50-mRNA-1	maker-scf300000870601.0-augustus-gene-6.83-mRNA-1	maker-scf300000870586.0-snap-gene-4.119-mRNA-1	maker-scf300000870607.0-snap-gene-0.5-mRNA-1	maker-scf300000870593.0-snap-gene-3.70-mRNA-1	maker-scf300000870601.1-snap-gene-6.138-mRNA-1	maker-scf300000870593.0-snap-gene-4.92-mRNA-1	maker-scf300000870595.0-snap-gene-6.224-mRNA-1	maker-scf300000870619.2-snap-gene-3.110-mRNA-1	snap_masked-scf300000870642.0-processed-gene-0.19-mRNA-1	maker-scf300000870593.0-snap-gene-0.109-mRNA-1	maker-scf300000870603.1-augustus-gene-0.146-mRNA-1	maker-scf300000870603.0-snap-gene-14.115-mRNA-1	maker-scf300000870693.1-augustus-gene-4.222-mRNA-1	augustus_masked-scf300000870754.0-processed-gene-5.49-mRNA-1	maker-scf300000870619.2-snap-gene-1.63-mRNA-1	maker-scf300000870601.0-snap-gene-10.108-mRNA-1	maker-scf300000870601.0-snap-gene-12.63-mRNA-1	maker-scf300000870601.0-snap-gene-17.70-mRNA-1	maker-scf300000870601.0-snap-gene-4.2-mRNA-1
	maker-scf300000870673.2-snap-gene-3.107-mRNA-1	maker-scf300000870673.2-snap-gene-10.125-mRNA-1	maker-scf300000870631.0-snap-gene-4.64-mRNA-1	maker-scf300000870735.0-snap-gene-12.66-mRNA-1	maker-scf300000870595.0-snap-gene-2.73-mRNA-1	maker-scf300000870601.0-snap-gene-1.59-mRNA-1	maker-scf300000870586.0-snap-gene-4.134-mRNA-1	maker-scf300000870607.0-snap-gene-1.0-mRNA-1	maker-scf300000870593.0-snap-gene-4.64-mRNA-1	maker-scf300000870603.0-augustus-gene-8.83-mRNA-1	maker-scf300000870593.0-snap-gene-4.93-mRNA-1	maker-scf300000870595.0-snap-gene-6.237-mRNA-1	maker-scf300000870619.2-snap-gene-3.111-mRNA-1	snap_masked-scf300000870651.1-processed-gene-1.59-mRNA-1	maker-scf300000870593.0-snap-gene-1.114-mRNA-1	maker-scf300000870603.1-snap-gene-0.57-mRNA-1	maker-scf300000870603.0-snap-gene-14.118-mRNA-1	maker-scf300000870693.1-snap-gene-0.52-mRNA-1	augustus_masked-scf300000870754.0-processed-gene-5.64-mRNA-1	maker-scf300000870619.2-snap-gene-2.20-mRNA-1	maker-scf300000870601.0-snap-gene-10.110-mRNA-1	maker-scf300000870601.0-snap-gene-12.82-mRNA-1	maker-scf300000870601.0-snap-gene-17.74-mRNA-1	maker-scf300000870601.0-snap-gene-4.31-mRNA-1
	maker-scf300000870673.2-snap-gene-3.125-mRNA-1	maker-scf300000870673.2-snap-gene-10.150-mRNA-1	maker-scf300000870631.0-snap-gene-5.101-mRNA-1	maker-scf300000870735.0-snap-gene-13.15-mRNA-1	maker-scf300000870595.0-snap-gene-2.80-mRNA-1	maker-scf300000870601.0-snap-gene-1.60-mRNA-1	maker-scf300000870586.0-snap-gene-4.145-mRNA-1	maker-scf300000870607.0-snap-gene-1.15-mRNA-1	maker-scf300000870593.0-snap-gene-4.66-mRNA-1	maker-scf300000870603.0-snap-gene-1.117-mRNA-1	maker-scf300000870593.0-snap-gene-5.113-mRNA-1	maker-scf300000870595.0-snap-gene-6.239-mRNA-1	maker-scf300000870619.2-snap-gene-3.130-mRNA-1	snap_masked-scf300000870651.1-processed-gene-3.7-mRNA-1	maker-scf300000870593.0-snap-gene-1.115-mRNA-1	maker-scf300000870603.1-snap-gene-0.62-mRNA-1	maker-scf300000870603.0-snap-gene-15.144-mRNA-1	maker-scf300000870693.1-snap-gene-0.59-mRNA-1	augustus_masked-scf300000870754.0-processed-gene-5.68-mRNA-1	maker-scf300000870619.2-snap-gene-2.25-mRNA-1	maker-scf300000870601.0-snap-gene-10.118-mRNA-1	maker-scf300000870601.0-snap-gene-13.1-mRNA-1	maker-scf300000870601.0-snap-gene-18.54-mRNA-1	maker-scf300000870601.0-snap-gene-5.86-mRNA-1
	maker-scf300000870673.2-snap-gene-3.126-mRNA-1	maker-scf300000870673.2-snap-gene-12.77-mRNA-1	maker-scf300000870631.0-snap-gene-5.104-mRNA-1	maker-scf300000870735.0-snap-gene-4.96-mRNA-1	maker-scf300000870595.0-snap-gene-2.84-mRNA-1	maker-scf300000870601.0-snap-gene-10.102-mRNA-1	maker-scf300000870586.0-snap-gene-4.95-mRNA-1	maker-scf300000870611.0-snap-gene-0.144-mRNA-1	maker-scf300000870593.0-snap-gene-4.76-mRNA-1	maker-scf300000870603.0-snap-gene-12.116-mRNA-1	maker-scf300000870593.0-snap-gene-5.115-mRNA-1	maker-scf300000870595.1-snap-gene-1.126-mRNA-1	maker-scf300000870619.2-snap-gene-3.144-mRNA-1	snap_masked-scf300000870651.1-processed-gene-6.23-mRNA-1	maker-scf300000870593.0-snap-gene-1.116-mRNA-1	maker-scf300000870603.1-snap-gene-0.72-mRNA-1	maker-scf300000870603.0-snap-gene-2.10-mRNA-1	maker-scf300000870693.1-snap-gene-1.116-mRNA-1	augustus_masked-scf300000870754.0-processed-gene-6.0-mRNA-1	maker-scf300000870619.2-snap-gene-2.27-mRNA-1	maker-scf300000870601.0-snap-gene-11.20-mRNA-1	maker-scf300000870601.0-snap-gene-13.17-mRNA-1	maker-scf300000870601.0-snap-gene-18.56-mRNA-1	maker-scf300000870601.0-snap-gene-6.62-mRNA-1
	maker-scf300000870673.2-snap-gene-5.60-mRNA-1	maker-scf300000870673.2-snap-gene-12.82-mRNA-1	maker-scf300000870631.0-snap-gene-5.113-mRNA-1	maker-scf300000870735.0-snap-gene-5.0-mRNA-1	maker-scf300000870595.0-snap-gene-4.10-mRNA-1	maker-scf300000870601.0-snap-gene-10.104-mRNA-1	maker-scf300000870593.0-snap-gene-0.105-mRNA-1	maker-scf300000870613.1-snap-gene-0.148-mRNA-1	maker-scf300000870593.0-snap-gene-4.77-mRNA-1	maker-scf300000870603.0-snap-gene-12.134-mRNA-1	maker-scf300000870593.0-snap-gene-5.120-mRNA-1	maker-scf300000870595.1-snap-gene-1.136-mRNA-1	maker-scf300000870619.2-snap-gene-4.109-mRNA-1	snap_masked-scf300000870662.0-processed-gene-10.76-mRNA-1	maker-scf300000870593.0-snap-gene-1.123-mRNA-1	maker-scf300000870605.0-snap-gene-0.139-mRNA-1	maker-scf300000870603.0-snap-gene-2.11-mRNA-1	maker-scf300000870693.1-snap-gene-1.122-mRNA-1	augustus_masked-scf300000870754.0-processed-gene-6.18-mRNA-1	maker-scf300000870619.2-snap-gene-3.107-mRNA-1	maker-scf300000870601.0-snap-gene-11.21-mRNA-1	maker-scf300000870601.0-snap-gene-13.18-mRNA-1	maker-scf300000870601.0-snap-gene-19.23-mRNA-1	maker-scf300000870601.0-snap-gene-8.113-mRNA-1
	maker-scf300000870673.2-snap-gene-5.62-mRNA-1	maker-scf300000870673.2-snap-gene-12.86-mRNA-1	maker-scf300000870641.0-snap-gene-0.53-mRNA-1	maker-scf300000870735.0-snap-gene-7.63-mRNA-1	maker-scf300000870595.0-snap-gene-4.32-mRNA-1	maker-scf300000870601.0-snap-gene-10.110-mRNA-1	maker-scf300000870593.0-snap-gene-1.109-mRNA-1	maker-scf300000870613.1-snap-gene-0.152-mRNA-1	maker-scf300000870593.0-snap-gene-4.92-mRNA-1	maker-scf300000870603.0-snap-gene-12.152-mRNA-1	maker-scf300000870593.0-snap-gene-5.121-mRNA-1	maker-scf300000870595.1-snap-gene-2.139-mRNA-1	maker-scf300000870619.2-snap-gene-4.87-mRNA-1	snap_masked-scf300000870662.0-processed-gene-11.27-mRNA-1	maker-scf300000870593.0-snap-gene-2.50-mRNA-1	maker-scf300000870605.0-snap-gene-0.144-mRNA-1	maker-scf300000870603.0-snap-gene-3.77-mRNA-1	maker-scf300000870693.1-snap-gene-3.30-mRNA-1	augustus_masked-scf300000870754.0-processed-gene-6.3-mRNA-1	maker-scf300000870619.2-snap-gene-3.130-mRNA-1	maker-scf300000870601.0-snap-gene-11.22-mRNA-1	maker-scf300000870601.0-snap-gene-15.111-mRNA-1	maker-scf300000870601.0-snap-gene-19.32-mRNA-1	maker-scf300000870601.0-snap-gene-8.131-mRNA-1
	maker-scf300000870681.0-snap-gene-0.59-mRNA-1	maker-scf300000870673.2-snap-gene-13.63-mRNA-1	maker-scf300000870641.0-snap-gene-1.12-mRNA-1	maker-scf300000870735.0-snap-gene-7.73-mRNA-1	maker-scf300000870595.0-snap-gene-4.40-mRNA-1	maker-scf300000870601.0-snap-gene-11.2-mRNA-1	maker-scf300000870593.0-snap-gene-1.112-mRNA-1	maker-scf300000870619.2-snap-gene-0.49-mRNA-1	maker-scf300000870593.0-snap-gene-4.93-mRNA-1	maker-scf300000870603.0-snap-gene-13.59-mRNA-1	maker-scf300000870593.0-snap-gene-5.135-mRNA-1	maker-scf300000870595.1-snap-gene-2.149-mRNA-1	maker-scf300000870629.0-augustus-gene-1.54-mRNA-1	snap_masked-scf300000870662.0-processed-gene-11.53-mRNA-1	maker-scf300000870593.0-snap-gene-3.53-mRNA-1	maker-scf300000870605.0-snap-gene-0.145-mRNA-1	maker-scf300000870603.0-snap-gene-3.79-mRNA-1	maker-scf300000870693.1-snap-gene-4.102-mRNA-1	augustus_masked-scf300000870754.0-processed-gene-7.19-mRNA-1	maker-scf300000870619.2-snap-gene-4.101-mRNA-1	maker-scf300000870601.0-snap-gene-11.31-mRNA-1	maker-scf300000870601.0-snap-gene-15.116-mRNA-1	maker-scf300000870601.0-snap-gene-19.37-mRNA-1	maker-scf300000870601.1-snap-gene-0.67-mRNA-1
	maker-scf300000870693.1-snap-gene-0.47-mRNA-1	maker-scf300000870673.2-snap-gene-14.60-mRNA-1	maker-scf300000870641.0-snap-gene-1.17-mRNA-1	maker-scf300000870735.0-snap-gene-9.67-mRNA-1	maker-scf300000870595.0-snap-gene-4.9-mRNA-1	maker-scf300000870601.0-snap-gene-12.60-mRNA-1	maker-scf300000870593.0-snap-gene-1.114-mRNA-1	maker-scf300000870619.2-snap-gene-0.59-mRNA-1	maker-scf300000870593.0-snap-gene-5.115-mRNA-1	maker-scf300000870603.0-snap-gene-14.116-mRNA-1	maker-scf300000870593.0-snap-gene-6.83-mRNA-1	maker-scf300000870595.1-snap-gene-2.151-mRNA-1	maker-scf300000870629.0-augustus-gene-5.105-mRNA-1	snap_masked-scf300000870662.0-processed-gene-3.23-mRNA-1	maker-scf300000870593.0-snap-gene-4.55-mRNA-1	maker-scf300000870605.0-snap-gene-0.148-mRNA-1	maker-scf300000870603.0-snap-gene-4.117-mRNA-1	maker-scf300000870693.1-snap-gene-4.62-mRNA-1	augustus_masked-scf300000870754.0-processed-gene-7.32-mRNA-1	maker-scf300000870619.2-snap-gene-4.102-mRNA-1	maker-scf300000870601.0-snap-gene-12.79-mRNA-1	maker-scf300000870601.0-snap-gene-17.74-mRNA-1	maker-scf300000870601.0-snap-gene-19.49-mRNA-1	maker-scf300000870601.1-snap-gene-1.48-mRNA-1
	maker-scf300000870693.1-snap-gene-1.103-mRNA-1	maker-scf300000870673.2-snap-gene-14.61-mRNA-1	maker-scf300000870641.0-snap-gene-1.24-mRNA-1	maker-scf300000870743.0-snap-gene-0.46-mRNA-1	maker-scf300000870595.0-snap-gene-5.52-mRNA-1	maker-scf300000870601.0-snap-gene-12.63-mRNA-1	maker-scf300000870593.0-snap-gene-1.120-mRNA-1	maker-scf300000870619.2-snap-gene-0.62-mRNA-1	maker-scf300000870593.0-snap-gene-5.121-mRNA-1	maker-scf300000870603.0-snap-gene-14.130-mRNA-1	maker-scf300000870593.0-snap-gene-7.109-mRNA-1	maker-scf300000870599.0-snap-gene-0.78-mRNA-1	maker-scf300000870629.0-snap-gene-0.50-mRNA-1	snap_masked-scf300000870673.0-processed-gene-0.126-mRNA-1	maker-scf300000870593.0-snap-gene-4.65-mRNA-1	maker-scf300000870607.0-snap-gene-0.0-mRNA-1	maker-scf300000870603.0-snap-gene-5.4-mRNA-1	maker-scf300000870693.1-snap-gene-4.63-mRNA-1	augustus_masked-scf300000870754.0-processed-gene-7.44-mRNA-1	maker-scf300000870619.2-snap-gene-4.84-mRNA-1	maker-scf300000870601.0-snap-gene-12.82-mRNA-1	maker-scf300000870601.0-snap-gene-17.76-mRNA-1	maker-scf300000870601.0-snap-gene-2.121-mRNA-1	maker-scf300000870601.1-snap-gene-2.46-mRNA-1
	maker-scf300000870693.1-snap-gene-3.77-mRNA-1	maker-scf300000870673.2-snap-gene-14.71-mRNA-1	maker-scf300000870641.0-snap-gene-2.108-mRNA-1	maker-scf300000870743.0-snap-gene-2.0-mRNA-1	maker-scf300000870595.0-snap-gene-6.212-mRNA-1	maker-scf300000870601.0-snap-gene-12.68-mRNA-1	maker-scf300000870593.0-snap-gene-1.125-mRNA-1	maker-scf300000870619.2-snap-gene-2.10-mRNA-1	maker-scf300000870593.0-snap-gene-5.122-mRNA-1	maker-scf300000870603.0-snap-gene-16.72-mRNA-1	maker-scf300000870593.0-snap-gene-7.90-mRNA-1	maker-scf300000870599.0-snap-gene-0.84-mRNA-1	maker-scf300000870629.0-snap-gene-0.51-mRNA-1	snap_masked-scf300000870673.0-processed-gene-0.136-mRNA-1	maker-scf300000870593.0-snap-gene-5.120-mRNA-1	maker-scf300000870607.0-snap-gene-0.12-mRNA-1	maker-scf300000870603.0-snap-gene-6.51-mRNA-1	maker-scf300000870693.1-snap-gene-4.66-mRNA-1	augustus_masked-scf300000870754.0-processed-gene-8.106-mRNA-1	maker-scf300000870629.0-snap-gene-0.48-mRNA-1	maker-scf300000870601.0-snap-gene-12.89-mRNA-1	maker-scf300000870601.0-snap-gene-18.56-mRNA-1	maker-scf300000870601.0-snap-gene-4.10-mRNA-1	maker-scf300000870601.1-snap-gene-2.47-mRNA-1
	maker-scf300000870730.0-snap-gene-0.35-mRNA-1	maker-scf300000870673.2-snap-gene-15.112-mRNA-1	maker-scf300000870641.0-snap-gene-2.122-mRNA-1	maker-scf300000870743.0-snap-gene-2.18-mRNA-1	maker-scf300000870595.0-snap-gene-6.217-mRNA-1	maker-scf300000870601.0-snap-gene-12.70-mRNA-1	maker-scf300000870593.0-snap-gene-2.56-mRNA-1	maker-scf300000870619.2-snap-gene-4.83-mRNA-1	maker-scf300000870593.0-snap-gene-5.134-mRNA-1	maker-scf300000870603.0-snap-gene-16.78-mRNA-1	maker-scf300000870593.0-snap-gene-7.96-mRNA-1	maker-scf300000870599.0-snap-gene-1.142-mRNA-1	maker-scf300000870629.0-snap-gene-0.61-mRNA-1	snap_masked-scf300000870673.0-processed-gene-0.139-mRNA-1	maker-scf300000870593.0-snap-gene-6.63-mRNA-1	maker-scf300000870607.0-snap-gene-1.24-mRNA-1	maker-scf300000870603.0-snap-gene-8.16-mRNA-1	maker-scf300000870693.1-snap-gene-4.67-mRNA-1	augustus_masked-scf300000870754.0-processed-gene-8.108-mRNA-1	maker-scf300000870629.0-snap-gene-0.52-mRNA-1	maker-scf300000870601.0-snap-gene-13.18-mRNA-1	maker-scf300000870601.0-snap-gene-18.64-mRNA-1	maker-scf300000870601.0-snap-gene-4.11-mRNA-1	maker-scf300000870601.1-snap-gene-2.50-mRNA-1
	maker-scf300000870733.0-snap-gene-0.204-mRNA-1	maker-scf300000870673.2-snap-gene-15.96-mRNA-1	maker-scf300000870641.0-snap-gene-2.127-mRNA-1	maker-scf300000870743.0-snap-gene-2.4-mRNA-1	maker-scf300000870595.0-snap-gene-6.226-mRNA-1	maker-scf300000870601.0-snap-gene-12.85-mRNA-1	maker-scf300000870593.0-snap-gene-2.62-mRNA-1	maker-scf300000870629.0-snap-gene-1.72-mRNA-1	maker-scf300000870593.0-snap-gene-5.135-mRNA-1	maker-scf300000870603.0-snap-gene-17.18-mRNA-1	maker-scf300000870595.0-snap-gene-0.0-mRNA-1	maker-scf300000870599.0-snap-gene-1.156-mRNA-1	maker-scf300000870629.0-snap-gene-1.66-mRNA-1	snap_masked-scf300000870673.1-processed-gene-1.152-mRNA-1	maker-scf300000870593.0-snap-gene-7.116-mRNA-1	maker-scf300000870611.0-snap-gene-0.135-mRNA-1	maker-scf300000870603.0-snap-gene-8.17-mRNA-1	maker-scf300000870693.1-snap-gene-4.85-mRNA-1	augustus_masked-scf300000870754.0-processed-gene-8.113-mRNA-1	maker-scf300000870629.0-snap-gene-6.52-mRNA-1	maker-scf300000870601.0-snap-gene-13.21-mRNA-1	maker-scf300000870601.0-snap-gene-19.26-mRNA-1	maker-scf300000870601.0-snap-gene-8.113-mRNA-1	maker-scf300000870601.1-snap-gene-2.52-mRNA-1
	maker-scf300000870733.0-snap-gene-0.230-mRNA-1	maker-scf300000870673.2-snap-gene-2.19-mRNA-1	maker-scf300000870641.0-snap-gene-2.99-mRNA-1	maker-scf300000870743.0-snap-gene-2.40-mRNA-1	maker-scf300000870595.0-snap-gene-6.232-mRNA-1	maker-scf300000870601.0-snap-gene-13.14-mRNA-1	maker-scf300000870593.0-snap-gene-4.76-mRNA-1	maker-scf300000870631.0-augustus-gene-1.78-mRNA-1	maker-scf300000870593.0-snap-gene-6.83-mRNA-1	maker-scf300000870603.0-snap-gene-17.22-mRNA-1	maker-scf300000870595.0-snap-gene-4.24-mRNA-1	maker-scf300000870599.0-snap-gene-1.164-mRNA-1	maker-scf300000870629.0-snap-gene-3.49-mRNA-1	snap_masked-scf300000870673.2-processed-gene-0.56-mRNA-1	maker-scf300000870593.0-snap-gene-7.125-mRNA-1	maker-scf300000870613.1-snap-gene-0.118-mRNA-1	maker-scf300000870603.0-snap-gene-8.25-mRNA-1	maker-scf300000870733.0-snap-gene-0.216-mRNA-1	augustus_masked-scf300000870754.0-processed-gene-8.76-mRNA-1	maker-scf300000870631.0-snap-gene-1.58-mRNA-1	maker-scf300000870601.0-snap-gene-14.68-mRNA-1	maker-scf300000870601.0-snap-gene-19.43-mRNA-1	maker-scf300000870601.0-snap-gene-8.114-mRNA-1	maker-scf300000870601.1-snap-gene-3.54-mRNA-1
	maker-scf300000870733.0-snap-gene-0.242-mRNA-1	maker-scf300000870673.2-snap-gene-3.109-mRNA-1	maker-scf300000870641.1-snap-gene-0.11-mRNA-1	maker-scf300000870743.0-snap-gene-4.104-mRNA-1	maker-scf300000870595.1-snap-gene-1.118-mRNA-1	maker-scf300000870601.0-snap-gene-14.82-mRNA-1	maker-scf300000870593.0-snap-gene-4.77-mRNA-1	maker-scf300000870631.0-snap-gene-0.126-mRNA-1	maker-scf300000870593.0-snap-gene-7.90-mRNA-1	maker-scf300000870603.0-snap-gene-18.108-mRNA-1	maker-scf300000870595.0-snap-gene-4.5-mRNA-1	maker-scf300000870599.0-snap-gene-1.178-mRNA-1	maker-scf300000870629.0-snap-gene-3.50-mRNA-1	snap_masked-scf300000870673.2-processed-gene-10.112-mRNA-1	maker-scf300000870593.0-snap-gene-7.128-mRNA-1	maker-scf300000870613.1-snap-gene-0.151-mRNA-1	maker-scf300000870603.0-snap-gene-9.113-mRNA-1	maker-scf300000870735.0-augustus-gene-1.89-mRNA-1	augustus_masked-scf300000870754.0-processed-gene-9.95-mRNA-1	maker-scf300000870631.0-snap-gene-4.51-mRNA-1	maker-scf300000870601.0-snap-gene-15.106-mRNA-1	maker-scf300000870601.0-snap-gene-2.110-mRNA-1	maker-scf300000870601.0-snap-gene-8.115-mRNA-1	maker-scf300000870601.1-snap-gene-3.68-mRNA-1
	maker-scf300000870735.0-augustus-gene-4.11-mRNA-1	maker-scf300000870673.2-snap-gene-4.68-mRNA-1	maker-scf300000870641.1-snap-gene-0.12-mRNA-1	maker-scf300000870743.0-snap-gene-4.97-mRNA-1	maker-scf300000870595.1-snap-gene-1.128-mRNA-1	maker-scf300000870601.0-snap-gene-14.83-mRNA-1	maker-scf300000870593.0-snap-gene-4.87-mRNA-1	maker-scf300000870631.0-snap-gene-1.71-mRNA-1	maker-scf300000870595.0-augustus-gene-2.143-mRNA-1	maker-scf300000870603.0-snap-gene-2.12-mRNA-1	maker-scf300000870595.0-snap-gene-6.211-mRNA-1	maker-scf300000870601.0-snap-gene-1.55-mRNA-1	maker-scf300000870629.0-snap-gene-4.114-mRNA-1	snap_masked-scf300000870673.2-processed-gene-12.97-mRNA-1	maker-scf300000870595.0-augustus-gene-4.120-mRNA-1	maker-scf300000870619.0-snap-gene-0.5-mRNA-1	maker-scf300000870603.0-snap-gene-9.115-mRNA-1	maker-scf300000870735.0-snap-gene-1.21-mRNA-1	augustus_masked-scf300000870756.2-processed-gene-0.3-mRNA-1	maker-scf300000870631.0-snap-gene-4.58-mRNA-1	maker-scf300000870601.0-snap-gene-15.108-mRNA-1	maker-scf300000870601.0-snap-gene-3.66-mRNA-1	maker-scf300000870601.0-snap-gene-8.126-mRNA-1	maker-scf300000870601.1-snap-gene-4.144-mRNA-1
	maker-scf300000870735.0-snap-gene-1.18-mRNA-1	maker-scf300000870673.2-snap-gene-5.62-mRNA-1	maker-scf300000870641.1-snap-gene-0.27-mRNA-1	maker-scf300000870743.0-snap-gene-5.7-mRNA-1	maker-scf300000870595.1-snap-gene-2.145-mRNA-1	maker-scf300000870601.0-snap-gene-15.112-mRNA-1	maker-scf300000870593.0-snap-gene-5.127-mRNA-1	maker-scf300000870631.0-snap-gene-2.7-mRNA-1	maker-scf300000870595.0-snap-gene-0.12-mRNA-1	maker-scf300000870603.0-snap-gene-2.8-mRNA-1	maker-scf300000870595.0-snap-gene-6.221-mRNA-1	maker-scf300000870601.0-snap-gene-1.74-mRNA-1	maker-scf300000870629.0-snap-gene-4.115-mRNA-1	snap_masked-scf300000870673.2-processed-gene-14.41-mRNA-1	maker-scf300000870595.0-snap-gene-1.46-mRNA-1	maker-scf300000870619.2-snap-gene-0.47-mRNA-1	maker-scf300000870603.0-snap-gene-9.116-mRNA-1	maker-scf300000870735.0-snap-gene-11.67-mRNA-1	maker-scf300000870586.0-snap-gene-0.73-mRNA-1	maker-scf300000870631.0-snap-gene-5.120-mRNA-1	maker-scf300000870601.0-snap-gene-15.111-mRNA-1	maker-scf300000870601.0-snap-gene-3.75-mRNA-1	maker-scf300000870601.0-snap-gene-9.61-mRNA-1	maker-scf300000870601.1-snap-gene-5.4-mRNA-1
	maker-scf300000870735.0-snap-gene-1.31-mRNA-1	maker-scf300000870673.2-snap-gene-5.78-mRNA-1	maker-scf300000870641.1-snap-gene-0.30-mRNA-1	maker-scf300000870744.0-snap-gene-1.78-mRNA-1	maker-scf300000870595.1-snap-gene-2.148-mRNA-1	maker-scf300000870601.0-snap-gene-16.119-mRNA-1	maker-scf300000870593.0-snap-gene-5.134-mRNA-1	maker-scf300000870631.0-snap-gene-3.81-mRNA-1	maker-scf300000870595.0-snap-gene-0.4-mRNA-1	maker-scf300000870603.0-snap-gene-3.78-mRNA-1	maker-scf300000870595.0-snap-gene-6.224-mRNA-1	maker-scf300000870601.0-snap-gene-10.116-mRNA-1	maker-scf300000870629.0-snap-gene-4.122-mRNA-1	snap_masked-scf300000870673.2-processed-gene-8.143-mRNA-1	maker-scf300000870595.0-snap-gene-3.72-mRNA-1	maker-scf300000870619.2-snap-gene-1.53-mRNA-1	maker-scf300000870603.0-snap-gene-9.117-mRNA-1	maker-scf300000870735.0-snap-gene-12.82-mRNA-1	maker-scf300000870586.0-snap-gene-1.75-mRNA-1	maker-scf300000870635.0-snap-gene-0.162-mRNA-1	maker-scf300000870601.0-snap-gene-17.74-mRNA-1	maker-scf300000870601.0-snap-gene-4.1-mRNA-1	maker-scf300000870601.0-snap-gene-9.70-mRNA-1	maker-scf300000870601.1-snap-gene-6.113-mRNA-1
	maker-scf300000870735.0-snap-gene-12.63-mRNA-1	maker-scf300000870673.2-snap-gene-9.116-mRNA-1	maker-scf300000870642.2-snap-gene-0.46-mRNA-1	maker-scf300000870744.1-snap-gene-1.65-mRNA-1	maker-scf300000870595.1-snap-gene-2.149-mRNA-1	maker-scf300000870601.0-snap-gene-17.75-mRNA-1	maker-scf300000870593.0-snap-gene-5.139-mRNA-1	maker-scf300000870631.0-snap-gene-3.99-mRNA-1	maker-scf300000870595.0-snap-gene-0.9-mRNA-1	maker-scf300000870603.0-snap-gene-4.116-mRNA-1	maker-scf300000870595.1-snap-gene-1.126-mRNA-1	maker-scf300000870601.0-snap-gene-12.70-mRNA-1	maker-scf300000870631.0-snap-gene-0.111-mRNA-1	snap_masked-scf300000870681.0-processed-gene-0.103-mRNA-1	maker-scf300000870595.0-snap-gene-4.40-mRNA-1	maker-scf300000870619.2-snap-gene-1.58-mRNA-1	maker-scf300000870603.0-snap-gene-9.122-mRNA-1	maker-scf300000870735.0-snap-gene-12.83-mRNA-1	maker-scf300000870586.0-snap-gene-2.67-mRNA-1	maker-scf300000870641.0-snap-gene-1.13-mRNA-1	maker-scf300000870601.0-snap-gene-18.56-mRNA-1	maker-scf300000870601.0-snap-gene-4.22-mRNA-1	maker-scf300000870601.1-augustus-gene-5.63-mRNA-1	maker-scf300000870601.1-snap-gene-6.140-mRNA-1
	maker-scf300000870735.0-snap-gene-13.13-mRNA-1	maker-scf300000870682.0-snap-gene-0.3-mRNA-1	maker-scf300000870651.0-snap-gene-0.52-mRNA-1	maker-scf300000870744.1-snap-gene-3.21-mRNA-1	maker-scf300000870599.0-snap-gene-0.76-mRNA-1	maker-scf300000870601.0-snap-gene-18.61-mRNA-1	maker-scf300000870593.0-snap-gene-5.142-mRNA-1	maker-scf300000870631.0-snap-gene-4.45-mRNA-1	maker-scf300000870595.0-snap-gene-1.52-mRNA-1	maker-scf300000870603.0-snap-gene-4.120-mRNA-1	maker-scf300000870595.1-snap-gene-1.136-mRNA-1	maker-scf300000870601.0-snap-gene-12.73-mRNA-1	maker-scf300000870631.0-snap-gene-2.19-mRNA-1	snap_masked-scf300000870693.1-processed-gene-4.18-mRNA-1	maker-scf300000870595.0-snap-gene-4.9-mRNA-1	maker-scf300000870629.0-augustus-gene-1.60-mRNA-1	maker-scf300000870603.0-snap-gene-9.138-mRNA-1	maker-scf300000870735.0-snap-gene-2.76-mRNA-1	maker-scf300000870586.0-snap-gene-3.60-mRNA-1	maker-scf300000870641.0-snap-gene-2.128-mRNA-1	maker-scf300000870601.0-snap-gene-19.23-mRNA-1	maker-scf300000870601.0-snap-gene-5.92-mRNA-1	maker-scf300000870601.1-augustus-gene-5.67-mRNA-1	maker-scf300000870603.0-augustus-gene-14.2-mRNA-1
	maker-scf300000870735.0-snap-gene-14.15-mRNA-1	maker-scf300000870693.1-snap-gene-1.103-mRNA-1	maker-scf300000870651.1-augustus-gene-2.52-mRNA-1	maker-scf300000870744.1-snap-gene-5.24-mRNA-1	maker-scf300000870599.0-snap-gene-0.84-mRNA-1	maker-scf300000870601.0-snap-gene-2.112-mRNA-1	maker-scf300000870593.0-snap-gene-6.60-mRNA-1	maker-scf300000870631.0-snap-gene-4.50-mRNA-1	maker-scf300000870595.0-snap-gene-2.73-mRNA-1	maker-scf300000870603.0-snap-gene-5.21-mRNA-1	maker-scf300000870595.1-snap-gene-2.115-mRNA-1	maker-scf300000870601.0-snap-gene-12.87-mRNA-1	maker-scf300000870631.0-snap-gene-2.22-mRNA-1	snap_masked-scf300000870733.0-processed-gene-0.174-mRNA-1	maker-scf300000870595.0-snap-gene-5.49-mRNA-1	maker-scf300000870629.0-snap-gene-0.49-mRNA-1	maker-scf300000870603.1-snap-gene-0.86-mRNA-1	maker-scf300000870735.0-snap-gene-3.70-mRNA-1	maker-scf300000870586.0-snap-gene-3.61-mRNA-1	maker-scf300000870642.2-snap-gene-0.44-mRNA-1	maker-scf300000870601.0-snap-gene-19.37-mRNA-1	maker-scf300000870601.0-snap-gene-6.62-mRNA-1	maker-scf300000870601.1-snap-gene-1.48-mRNA-1	maker-scf300000870603.0-augustus-gene-2.112-mRNA-1
	maker-scf300000870735.0-snap-gene-14.33-mRNA-1	maker-scf300000870693.1-snap-gene-2.91-mRNA-1	maker-scf300000870651.1-snap-gene-0.65-mRNA-1	maker-scf300000870745.0-augustus-gene-1.125-mRNA-1	maker-scf300000870599.0-snap-gene-1.135-mRNA-1	maker-scf300000870601.0-snap-gene-2.115-mRNA-1	maker-scf300000870593.0-snap-gene-6.68-mRNA-1	maker-scf300000870631.0-snap-gene-5.101-mRNA-1	maker-scf300000870595.0-snap-gene-2.85-mRNA-1	maker-scf300000870603.0-snap-gene-6.65-mRNA-1	maker-scf300000870595.1-snap-gene-2.129-mRNA-1	maker-scf300000870601.0-snap-gene-13.2-mRNA-1	maker-scf300000870631.0-snap-gene-2.6-mRNA-1	snap_masked-scf300000870735.0-processed-gene-1.49-mRNA-1	maker-scf300000870595.0-snap-gene-6.211-mRNA-1	maker-scf300000870629.0-snap-gene-0.52-mRNA-1	maker-scf300000870607.0-snap-gene-0.10-mRNA-1	maker-scf300000870735.0-snap-gene-5.0-mRNA-1	maker-scf300000870586.0-snap-gene-3.70-mRNA-1	maker-scf300000870642.2-snap-gene-0.56-mRNA-1	maker-scf300000870601.0-snap-gene-19.43-mRNA-1	maker-scf300000870601.0-snap-gene-6.65-mRNA-1	maker-scf300000870601.1-snap-gene-1.58-mRNA-1	maker-scf300000870603.0-snap-gene-0.17-mRNA-1
	maker-scf300000870735.0-snap-gene-2.71-mRNA-1	maker-scf300000870693.1-snap-gene-2.95-mRNA-1	maker-scf300000870651.1-snap-gene-1.18-mRNA-1	maker-scf300000870745.0-snap-gene-0.48-mRNA-1	maker-scf300000870599.0-snap-gene-1.141-mRNA-1	maker-scf300000870601.0-snap-gene-4.24-mRNA-1	maker-scf300000870593.0-snap-gene-7.116-mRNA-1	maker-scf300000870635.0-snap-gene-0.164-mRNA-1	maker-scf300000870595.0-snap-gene-4.24-mRNA-1	maker-scf300000870603.0-snap-gene-7.1-mRNA-1	maker-scf300000870599.0-snap-gene-0.76-mRNA-1	maker-scf300000870601.0-snap-gene-14.73-mRNA-1	maker-scf300000870631.0-snap-gene-2.7-mRNA-1	snap_masked-scf300000870735.0-processed-gene-10.130-mRNA-1	maker-scf300000870595.0-snap-gene-6.226-mRNA-1	maker-scf300000870629.0-snap-gene-1.70-mRNA-1	maker-scf300000870607.0-snap-gene-0.12-mRNA-1	maker-scf300000870735.0-snap-gene-5.14-mRNA-1	maker-scf300000870586.0-snap-gene-4.109-mRNA-1	maker-scf300000870651.1-snap-gene-1.10-mRNA-1	maker-scf300000870601.0-snap-gene-19.44-mRNA-1	maker-scf300000870601.1-snap-gene-1.42-mRNA-1	maker-scf300000870601.1-snap-gene-2.47-mRNA-1	maker-scf300000870603.0-snap-gene-0.4-mRNA-1
	maker-scf300000870735.0-snap-gene-2.73-mRNA-1	maker-scf300000870693.1-snap-gene-3.47-mRNA-1	maker-scf300000870651.1-snap-gene-2.70-mRNA-1	maker-scf300000870745.0-snap-gene-2.55-mRNA-1	maker-scf300000870599.0-snap-gene-1.142-mRNA-1	maker-scf300000870601.0-snap-gene-4.4-mRNA-1	maker-scf300000870593.0-snap-gene-7.118-mRNA-1	maker-scf300000870635.0-snap-gene-0.192-mRNA-1	maker-scf300000870595.0-snap-gene-4.4-mRNA-1	maker-scf300000870603.0-snap-gene-8.33-mRNA-1	maker-scf300000870599.0-snap-gene-0.84-mRNA-1	maker-scf300000870601.0-snap-gene-14.78-mRNA-1	maker-scf300000870631.0-snap-gene-3.74-mRNA-1	snap_masked-scf300000870735.0-processed-gene-12.19-mRNA-1	maker-scf300000870595.1-augustus-gene-0.46-mRNA-1	maker-scf300000870629.0-snap-gene-3.56-mRNA-1	maker-scf300000870613.1-snap-gene-0.132-mRNA-1	maker-scf300000870735.0-snap-gene-5.26-mRNA-1	maker-scf300000870586.0-snap-gene-4.114-mRNA-1	maker-scf300000870651.1-snap-gene-3.64-mRNA-1	maker-scf300000870601.0-snap-gene-2.110-mRNA-1	maker-scf300000870601.1-snap-gene-1.44-mRNA-1	maker-scf300000870601.1-snap-gene-2.52-mRNA-1	maker-scf300000870603.0-snap-gene-0.6-mRNA-1
	maker-scf300000870735.0-snap-gene-3.71-mRNA-1	maker-scf300000870693.1-snap-gene-3.63-mRNA-1	maker-scf300000870651.1-snap-gene-3.67-mRNA-1	maker-scf300000870745.0-snap-gene-2.65-mRNA-1	maker-scf300000870599.0-snap-gene-1.147-mRNA-1	maker-scf300000870601.0-snap-gene-5.101-mRNA-1	maker-scf300000870593.0-snap-gene-7.129-mRNA-1	maker-scf300000870641.0-snap-gene-0.48-mRNA-1	maker-scf300000870595.0-snap-gene-4.5-mRNA-1	maker-scf300000870605.0-augustus-gene-0.270-mRNA-1	maker-scf300000870599.0-snap-gene-1.142-mRNA-1	maker-scf300000870601.0-snap-gene-16.120-mRNA-1	maker-scf300000870631.0-snap-gene-3.87-mRNA-1	snap_masked-scf300000870735.0-processed-gene-5.46-mRNA-1	maker-scf300000870595.1-snap-gene-0.102-mRNA-1	maker-scf300000870629.0-snap-gene-4.100-mRNA-1	maker-scf300000870613.1-snap-gene-0.156-mRNA-1	maker-scf300000870735.0-snap-gene-6.12-mRNA-1	maker-scf300000870586.0-snap-gene-4.116-mRNA-1	maker-scf300000870651.1-snap-gene-3.67-mRNA-1	maker-scf300000870601.0-snap-gene-3.66-mRNA-1	maker-scf300000870601.1-snap-gene-1.48-mRNA-1	maker-scf300000870601.1-snap-gene-2.58-mRNA-1	maker-scf300000870603.0-snap-gene-1.107-mRNA-1
	maker-scf300000870735.0-snap-gene-4.88-mRNA-1	maker-scf300000870693.1-snap-gene-4.55-mRNA-1	maker-scf300000870651.1-snap-gene-4.85-mRNA-1	maker-scf300000870746.0-snap-gene-1.22-mRNA-1	maker-scf300000870599.0-snap-gene-1.149-mRNA-1	maker-scf300000870601.0-snap-gene-6.51-mRNA-1	maker-scf300000870593.0-snap-gene-7.88-mRNA-1	maker-scf300000870641.0-snap-gene-1.11-mRNA-1	maker-scf300000870595.0-snap-gene-5.58-mRNA-1	maker-scf300000870605.0-snap-gene-0.113-mRNA-1	maker-scf300000870599.0-snap-gene-1.161-mRNA-1	maker-scf300000870601.0-snap-gene-17.75-mRNA-1	maker-scf300000870631.0-snap-gene-3.88-mRNA-1	snap_masked-scf300000870743.0-processed-gene-2.81-mRNA-1	maker-scf300000870595.1-snap-gene-0.114-mRNA-1	maker-scf300000870629.0-snap-gene-5.22-mRNA-1	maker-scf300000870619.2-augustus-gene-3.92-mRNA-1	maker-scf300000870735.0-snap-gene-8.114-mRNA-1	maker-scf300000870586.0-snap-gene-4.141-mRNA-1	maker-scf300000870651.1-snap-gene-4.73-mRNA-1	maker-scf300000870601.0-snap-gene-4.31-mRNA-1	maker-scf300000870601.1-snap-gene-1.59-mRNA-1	maker-scf300000870601.1-snap-gene-3.53-mRNA-1	maker-scf300000870603.0-snap-gene-1.110-mRNA-1
	maker-scf300000870735.0-snap-gene-6.25-mRNA-1	maker-scf300000870733.0-snap-gene-0.204-mRNA-1	maker-scf300000870651.1-snap-gene-5.138-mRNA-1	maker-scf300000870746.0-snap-gene-1.28-mRNA-1	maker-scf300000870599.0-snap-gene-1.153-mRNA-1	maker-scf300000870601.0-snap-gene-6.79-mRNA-1	maker-scf300000870593.0-snap-gene-7.91-mRNA-1	maker-scf300000870641.0-snap-gene-1.12-mRNA-1	maker-scf300000870595.0-snap-gene-6.211-mRNA-1	maker-scf300000870605.0-snap-gene-0.122-mRNA-1	maker-scf300000870599.0-snap-gene-1.171-mRNA-1	maker-scf300000870601.0-snap-gene-17.78-mRNA-1	maker-scf300000870631.0-snap-gene-3.99-mRNA-1	snap_masked-scf300000870743.0-processed-gene-3.102-mRNA-1	maker-scf300000870595.1-snap-gene-1.122-mRNA-1	maker-scf300000870629.0-snap-gene-6.52-mRNA-1	maker-scf300000870619.2-snap-gene-1.68-mRNA-1	maker-scf300000870735.0-snap-gene-9.78-mRNA-1	maker-scf300000870593.0-snap-gene-0.104-mRNA-1	maker-scf300000870651.1-snap-gene-6.91-mRNA-1	maker-scf300000870601.0-snap-gene-5.86-mRNA-1	maker-scf300000870601.1-snap-gene-2.46-mRNA-1	maker-scf300000870601.1-snap-gene-4.124-mRNA-1	maker-scf300000870603.0-snap-gene-1.120-mRNA-1
	maker-scf300000870735.0-snap-gene-8.131-mRNA-1	maker-scf300000870733.0-snap-gene-0.235-mRNA-1	maker-scf300000870651.1-snap-gene-6.100-mRNA-1	maker-scf300000870746.0-snap-gene-11.122-mRNA-1	maker-scf300000870599.0-snap-gene-1.160-mRNA-1	maker-scf300000870601.0-snap-gene-7.117-mRNA-1	maker-scf300000870595.0-augustus-gene-2.143-mRNA-1	maker-scf300000870641.0-snap-gene-1.17-mRNA-1	maker-scf300000870595.0-snap-gene-6.218-mRNA-1	maker-scf300000870605.0-snap-gene-0.139-mRNA-1	maker-scf300000870599.0-snap-gene-1.192-mRNA-1	maker-scf300000870601.0-snap-gene-18.59-mRNA-1	maker-scf300000870631.0-snap-gene-4.50-mRNA-1	snap_masked-scf300000870743.0-processed-gene-4.72-mRNA-1	maker-scf300000870595.1-snap-gene-1.136-mRNA-1	maker-scf300000870629.0-snap-gene-6.65-mRNA-1	maker-scf300000870619.2-snap-gene-2.14-mRNA-1	maker-scf300000870743.0-snap-gene-2.15-mRNA-1	maker-scf300000870593.0-snap-gene-0.109-mRNA-1	maker-scf300000870662.0-snap-gene-10.15-mRNA-1	maker-scf300000870601.0-snap-gene-6.62-mRNA-1	maker-scf300000870601.1-snap-gene-2.52-mRNA-1	maker-scf300000870601.1-snap-gene-4.129-mRNA-1	maker-scf300000870603.0-snap-gene-11.67-mRNA-1
	maker-scf300000870735.0-snap-gene-9.65-mRNA-1	maker-scf300000870735.0-snap-gene-1.17-mRNA-1	maker-scf300000870651.1-snap-gene-6.103-mRNA-1	maker-scf300000870746.0-snap-gene-11.129-mRNA-1	maker-scf300000870599.0-snap-gene-1.164-mRNA-1	maker-scf300000870601.0-snap-gene-7.128-mRNA-1	maker-scf300000870595.0-augustus-gene-4.120-mRNA-1	maker-scf300000870641.0-snap-gene-1.3-mRNA-1	maker-scf300000870595.0-snap-gene-6.220-mRNA-1	maker-scf300000870605.0-snap-gene-0.148-mRNA-1	maker-scf300000870601.0-augustus-gene-10.45-mRNA-1	maker-scf300000870601.0-snap-gene-19.14-mRNA-1	maker-scf300000870631.0-snap-gene-4.52-mRNA-1	snap_masked-scf300000870743.0-processed-gene-5.60-mRNA-1	maker-scf300000870595.1-snap-gene-2.124-mRNA-1	maker-scf300000870629.0-snap-gene-6.79-mRNA-1	maker-scf300000870619.2-snap-gene-2.27-mRNA-1	maker-scf300000870743.0-snap-gene-2.17-mRNA-1	maker-scf300000870593.0-snap-gene-0.113-mRNA-1	maker-scf300000870662.0-snap-gene-2.128-mRNA-1	maker-scf300000870601.0-snap-gene-8.113-mRNA-1	maker-scf300000870601.1-snap-gene-3.54-mRNA-1	maker-scf300000870601.1-snap-gene-4.132-mRNA-1	maker-scf300000870603.0-snap-gene-11.84-mRNA-1
	maker-scf300000870743.0-snap-gene-5.33-mRNA-1	maker-scf300000870735.0-snap-gene-1.18-mRNA-1	maker-scf300000870651.1-snap-gene-6.108-mRNA-1	maker-scf300000870746.0-snap-gene-13.168-mRNA-1	maker-scf300000870599.0-snap-gene-1.167-mRNA-1	maker-scf300000870601.0-snap-gene-7.130-mRNA-1	maker-scf300000870595.0-augustus-gene-4.121-mRNA-1	maker-scf300000870641.0-snap-gene-1.5-mRNA-1	maker-scf300000870595.0-snap-gene-6.221-mRNA-1	maker-scf300000870605.0-snap-gene-0.153-mRNA-1	maker-scf300000870601.0-snap-gene-1.55-mRNA-1	maker-scf300000870601.0-snap-gene-19.29-mRNA-1	maker-scf300000870631.0-snap-gene-4.55-mRNA-1	snap_masked-scf300000870743.0-processed-gene-6.94-mRNA-1	maker-scf300000870595.1-snap-gene-2.130-mRNA-1	maker-scf300000870631.0-snap-gene-0.121-mRNA-1	maker-scf300000870619.2-snap-gene-3.110-mRNA-1	maker-scf300000870743.0-snap-gene-2.18-mRNA-1	maker-scf300000870593.0-snap-gene-1.116-mRNA-1	maker-scf300000870662.0-snap-gene-2.155-mRNA-1	maker-scf300000870601.0-snap-gene-8.127-mRNA-1	maker-scf300000870601.1-snap-gene-4.144-mRNA-1	maker-scf300000870601.1-snap-gene-5.15-mRNA-1	maker-scf300000870603.0-snap-gene-11.85-mRNA-1
	maker-scf300000870743.0-snap-gene-6.19-mRNA-1	maker-scf300000870735.0-snap-gene-10.67-mRNA-1	maker-scf300000870651.1-snap-gene-6.123-mRNA-1	maker-scf300000870746.0-snap-gene-4.48-mRNA-1	maker-scf300000870599.0-snap-gene-1.188-mRNA-1	maker-scf300000870601.0-snap-gene-8.120-mRNA-1	maker-scf300000870595.0-snap-gene-0.12-mRNA-1	maker-scf300000870641.0-snap-gene-1.6-mRNA-1	maker-scf300000870595.0-snap-gene-6.224-mRNA-1	maker-scf300000870607.0-snap-gene-0.0-mRNA-1	maker-scf300000870601.0-snap-gene-10.102-mRNA-1	maker-scf300000870601.0-snap-gene-19.33-mRNA-1	maker-scf300000870631.0-snap-gene-5.114-mRNA-1	snap_masked-scf300000870744.1-processed-gene-1.115-mRNA-1	maker-scf300000870595.1-snap-gene-2.140-mRNA-1	maker-scf300000870631.0-snap-gene-2.4-mRNA-1	maker-scf300000870619.2-snap-gene-3.111-mRNA-1	maker-scf300000870743.0-snap-gene-2.39-mRNA-1	maker-scf300000870593.0-snap-gene-1.117-mRNA-1	maker-scf300000870662.0-snap-gene-3.78-mRNA-1	maker-scf300000870601.0-snap-gene-9.61-mRNA-1	maker-scf300000870601.1-snap-gene-5.4-mRNA-1	maker-scf300000870601.1-snap-gene-5.4-mRNA-1	maker-scf300000870603.0-snap-gene-12.115-mRNA-1
	maker-scf300000870744.1-snap-gene-0.1-mRNA-1	maker-scf300000870735.0-snap-gene-13.15-mRNA-1	maker-scf300000870662.0-augustus-gene-3.134-mRNA-1	maker-scf300000870746.0-snap-gene-4.71-mRNA-1	maker-scf300000870601.0-augustus-gene-6.83-mRNA-1	maker-scf300000870601.0-snap-gene-8.134-mRNA-1	maker-scf300000870595.0-snap-gene-0.16-mRNA-1	maker-scf300000870641.0-snap-gene-1.9-mRNA-1	maker-scf300000870595.0-snap-gene-6.237-mRNA-1	maker-scf300000870607.0-snap-gene-1.10-mRNA-1	maker-scf300000870601.0-snap-gene-10.114-mRNA-1	maker-scf300000870601.0-snap-gene-19.38-mRNA-1	maker-scf300000870635.0-snap-gene-0.172-mRNA-1	snap_masked-scf300000870744.1-processed-gene-5.139-mRNA-1	maker-scf300000870599.0-snap-gene-0.76-mRNA-1	maker-scf300000870631.0-snap-gene-4.51-mRNA-1	maker-scf300000870619.2-snap-gene-3.118-mRNA-1	maker-scf300000870743.0-snap-gene-2.40-mRNA-1	maker-scf300000870593.0-snap-gene-3.54-mRNA-1	maker-scf300000870662.0-snap-gene-4.52-mRNA-1	maker-scf300000870601.0-snap-gene-9.63-mRNA-1	maker-scf300000870601.1-snap-gene-6.106-mRNA-1	maker-scf300000870601.1-snap-gene-6.140-mRNA-1	maker-scf300000870603.0-snap-gene-12.121-mRNA-1
	maker-scf300000870744.1-snap-gene-1.70-mRNA-1	maker-scf300000870735.0-snap-gene-14.43-mRNA-1	maker-scf300000870662.0-snap-gene-1.0-mRNA-1	maker-scf300000870746.0-snap-gene-6.110-mRNA-1	maker-scf300000870601.0-snap-gene-1.46-mRNA-1	maker-scf300000870601.0-snap-gene-9.72-mRNA-1	maker-scf300000870595.0-snap-gene-0.4-mRNA-1	maker-scf300000870641.0-snap-gene-2.100-mRNA-1	maker-scf300000870595.1-snap-gene-0.104-mRNA-1	maker-scf300000870607.0-snap-gene-1.22-mRNA-1	maker-scf300000870601.0-snap-gene-10.116-mRNA-1	maker-scf300000870601.0-snap-gene-19.9-mRNA-1	maker-scf300000870641.0-snap-gene-0.48-mRNA-1	snap_masked-scf300000870745.0-processed-gene-0.23-mRNA-1	maker-scf300000870599.0-snap-gene-0.82-mRNA-1	maker-scf300000870631.0-snap-gene-4.58-mRNA-1	maker-scf300000870619.2-snap-gene-3.139-mRNA-1	maker-scf300000870743.0-snap-gene-3.116-mRNA-1	maker-scf300000870593.0-snap-gene-4.55-mRNA-1	maker-scf300000870662.0-snap-gene-4.54-mRNA-1	maker-scf300000870601.1-snap-gene-0.53-mRNA-1	maker-scf300000870601.1-snap-gene-6.145-mRNA-1	maker-scf300000870603.0-augustus-gene-14.2-mRNA-1	maker-scf300000870603.0-snap-gene-12.145-mRNA-1
	maker-scf300000870744.1-snap-gene-1.79-mRNA-1	maker-scf300000870735.0-snap-gene-14.61-mRNA-1	maker-scf300000870662.0-snap-gene-1.22-mRNA-1	maker-scf300000870746.0-snap-gene-6.122-mRNA-1	maker-scf300000870601.0-snap-gene-1.50-mRNA-1	maker-scf300000870601.1-augustus-gene-6.2-mRNA-1	maker-scf300000870595.0-snap-gene-0.5-mRNA-1	maker-scf300000870641.0-snap-gene-2.104-mRNA-1	maker-scf300000870595.1-snap-gene-0.110-mRNA-1	maker-scf300000870607.0-snap-gene-1.26-mRNA-1	maker-scf300000870601.0-snap-gene-11.2-mRNA-1	maker-scf300000870601.0-snap-gene-4.14-mRNA-1	maker-scf300000870641.0-snap-gene-0.50-mRNA-1	snap_masked-scf300000870745.0-processed-gene-0.39-mRNA-1	maker-scf300000870599.0-snap-gene-0.89-mRNA-1	maker-scf300000870631.0-snap-gene-4.65-mRNA-1	maker-scf300000870619.2-snap-gene-4.101-mRNA-1	maker-scf300000870743.0-snap-gene-4.104-mRNA-1	maker-scf300000870593.0-snap-gene-4.92-mRNA-1	maker-scf300000870662.0-snap-gene-4.77-mRNA-1	maker-scf300000870601.1-snap-gene-0.67-mRNA-1	maker-scf300000870603.0-augustus-gene-0.81-mRNA-1	maker-scf300000870603.0-snap-gene-0.0-mRNA-1	maker-scf300000870603.0-snap-gene-13.56-mRNA-1
	maker-scf300000870744.1-snap-gene-1.86-mRNA-1	maker-scf300000870735.0-snap-gene-2.58-mRNA-1	maker-scf300000870662.0-snap-gene-10.23-mRNA-1	maker-scf300000870746.0-snap-gene-8.61-mRNA-1	maker-scf300000870601.0-snap-gene-1.67-mRNA-1	maker-scf300000870601.1-snap-gene-1.50-mRNA-1	maker-scf300000870595.0-snap-gene-1.50-mRNA-1	maker-scf300000870641.1-snap-gene-0.24-mRNA-1	maker-scf300000870595.1-snap-gene-1.126-mRNA-1	maker-scf300000870607.0-snap-gene-1.28-mRNA-1	maker-scf300000870601.0-snap-gene-12.70-mRNA-1	maker-scf300000870601.0-snap-gene-4.27-mRNA-1	maker-scf300000870641.0-snap-gene-1.11-mRNA-1	snap_masked-scf300000870745.0-processed-gene-3.100-mRNA-1	maker-scf300000870599.0-snap-gene-1.135-mRNA-1	maker-scf300000870631.0-snap-gene-5.120-mRNA-1	maker-scf300000870619.2-snap-gene-4.102-mRNA-1	maker-scf300000870743.0-snap-gene-4.97-mRNA-1	maker-scf300000870593.0-snap-gene-4.93-mRNA-1	maker-scf300000870662.0-snap-gene-5.135-mRNA-1	maker-scf300000870601.1-snap-gene-1.42-mRNA-1	maker-scf300000870603.0-augustus-gene-0.82-mRNA-1	maker-scf300000870603.0-snap-gene-11.79-mRNA-1	maker-scf300000870603.0-snap-gene-15.141-mRNA-1
	maker-scf300000870744.1-snap-gene-4.59-mRNA-1	maker-scf300000870735.0-snap-gene-2.61-mRNA-1	maker-scf300000870662.0-snap-gene-10.4-mRNA-1	maker-scf300000870746.0-snap-gene-8.67-mRNA-1	maker-scf300000870601.0-snap-gene-1.68-mRNA-1	maker-scf300000870601.1-snap-gene-2.46-mRNA-1	maker-scf300000870595.0-snap-gene-2.80-mRNA-1	maker-scf300000870641.1-snap-gene-0.27-mRNA-1	maker-scf300000870595.1-snap-gene-1.136-mRNA-1	maker-scf300000870607.1-snap-gene-0.7-mRNA-1	maker-scf300000870601.0-snap-gene-13.14-mRNA-1	maker-scf300000870601.0-snap-gene-4.29-mRNA-1	maker-scf300000870641.0-snap-gene-1.15-mRNA-1	snap_masked-scf300000870746.0-processed-gene-10.50-mRNA-1	maker-scf300000870599.0-snap-gene-1.141-mRNA-1	maker-scf300000870635.0-snap-gene-0.186-mRNA-1	maker-scf300000870619.2-snap-gene-4.84-mRNA-1	maker-scf300000870743.0-snap-gene-6.21-mRNA-1	maker-scf300000870593.0-snap-gene-5.115-mRNA-1	maker-scf300000870662.0-snap-gene-5.145-mRNA-1	maker-scf300000870601.1-snap-gene-1.53-mRNA-1	maker-scf300000870603.0-augustus-gene-14.10-mRNA-1	maker-scf300000870603.0-snap-gene-11.85-mRNA-1	maker-scf300000870603.0-snap-gene-16.58-mRNA-1
	maker-scf300000870744.1-snap-gene-4.66-mRNA-1	maker-scf300000870735.0-snap-gene-2.71-mRNA-1	maker-scf300000870662.0-snap-gene-11.4-mRNA-1	maker-scf300000870746.0-snap-gene-9.67-mRNA-1	maker-scf300000870601.0-snap-gene-10.104-mRNA-1	maker-scf300000870601.1-snap-gene-3.63-mRNA-1	maker-scf300000870595.0-snap-gene-4.10-mRNA-1	maker-scf300000870651.1-augustus-gene-1.120-mRNA-1	maker-scf300000870595.1-snap-gene-2.115-mRNA-1	maker-scf300000870611.0-snap-gene-0.128-mRNA-1	maker-scf300000870601.0-snap-gene-13.17-mRNA-1	maker-scf300000870601.0-snap-gene-4.8-mRNA-1	maker-scf300000870641.0-snap-gene-1.37-mRNA-1	snap_masked-scf300000870746.0-processed-gene-12.54-mRNA-1	maker-scf300000870599.0-snap-gene-1.142-mRNA-1	maker-scf300000870641.0-snap-gene-0.53-mRNA-1	maker-scf300000870629.0-augustus-gene-5.105-mRNA-1	maker-scf300000870744.0-snap-gene-0.49-mRNA-1	maker-scf300000870593.0-snap-gene-5.120-mRNA-1	maker-scf300000870662.0-snap-gene-6.18-mRNA-1	maker-scf300000870601.1-snap-gene-1.59-mRNA-1	maker-scf300000870603.0-snap-gene-0.4-mRNA-1	maker-scf300000870603.0-snap-gene-12.139-mRNA-1	maker-scf300000870603.0-snap-gene-16.79-mRNA-1
	maker-scf300000870744.1-snap-gene-5.23-mRNA-1	maker-scf300000870735.0-snap-gene-2.73-mRNA-1	maker-scf300000870662.0-snap-gene-12.92-mRNA-1	maker-scf300000870748.0-snap-gene-1.78-mRNA-1	maker-scf300000870601.0-snap-gene-10.107-mRNA-1	maker-scf300000870601.1-snap-gene-4.135-mRNA-1	maker-scf300000870595.0-snap-gene-4.12-mRNA-1	maker-scf300000870651.1-snap-gene-0.71-mRNA-1	maker-scf300000870599.0-snap-gene-0.77-mRNA-1	maker-scf300000870613.1-snap-gene-0.115-mRNA-1	maker-scf300000870601.0-snap-gene-14.61-mRNA-1	maker-scf300000870601.0-snap-gene-6.51-mRNA-1	maker-scf300000870641.0-snap-gene-1.5-mRNA-1	snap_masked-scf300000870746.0-processed-gene-12.58-mRNA-1	maker-scf300000870599.0-snap-gene-1.153-mRNA-1	maker-scf300000870641.0-snap-gene-1.19-mRNA-1	maker-scf300000870631.0-snap-gene-1.69-mRNA-1	maker-scf300000870744.0-snap-gene-2.104-mRNA-1	maker-scf300000870593.0-snap-gene-5.122-mRNA-1	maker-scf300000870662.0-snap-gene-6.3-mRNA-1	maker-scf300000870601.1-snap-gene-2.46-mRNA-1	maker-scf300000870603.0-snap-gene-0.6-mRNA-1	maker-scf300000870603.0-snap-gene-12.151-mRNA-1	maker-scf300000870603.0-snap-gene-16.80-mRNA-1
	maker-scf300000870744.1-snap-gene-5.29-mRNA-1	maker-scf300000870735.0-snap-gene-3.68-mRNA-1	maker-scf300000870662.0-snap-gene-3.61-mRNA-1	maker-scf300000870748.0-snap-gene-2.13-mRNA-1	maker-scf300000870601.0-snap-gene-10.108-mRNA-1	maker-scf300000870601.1-snap-gene-4.150-mRNA-1	maker-scf300000870595.0-snap-gene-4.24-mRNA-1	maker-scf300000870651.1-snap-gene-1.18-mRNA-1	maker-scf300000870599.0-snap-gene-0.78-mRNA-1	maker-scf300000870613.1-snap-gene-0.119-mRNA-1	maker-scf300000870601.0-snap-gene-14.78-mRNA-1	maker-scf300000870601.0-snap-gene-6.67-mRNA-1	maker-scf300000870641.0-snap-gene-2.105-mRNA-1	snap_masked-scf300000870746.0-processed-gene-12.82-mRNA-1	maker-scf300000870599.0-snap-gene-1.161-mRNA-1	maker-scf300000870641.0-snap-gene-2.103-mRNA-1	maker-scf300000870631.0-snap-gene-2.19-mRNA-1	maker-scf300000870744.1-augustus-gene-3.89-mRNA-1	maker-scf300000870593.0-snap-gene-6.80-mRNA-1	maker-scf300000870662.0-snap-gene-7.64-mRNA-1	maker-scf300000870601.1-snap-gene-2.50-mRNA-1	maker-scf300000870603.0-snap-gene-1.114-mRNA-1	maker-scf300000870603.0-snap-gene-13.56-mRNA-1	maker-scf300000870603.0-snap-gene-17.10-mRNA-1
	maker-scf300000870744.1-snap-gene-5.31-mRNA-1	maker-scf300000870735.0-snap-gene-4.83-mRNA-1	maker-scf300000870662.0-snap-gene-5.115-mRNA-1	maker-scf300000870748.0-snap-gene-4.184-mRNA-1	maker-scf300000870601.0-snap-gene-10.110-mRNA-1	maker-scf300000870601.1-snap-gene-5.6-mRNA-1	maker-scf300000870595.0-snap-gene-4.32-mRNA-1	maker-scf300000870651.1-snap-gene-2.58-mRNA-1	maker-scf300000870599.0-snap-gene-1.142-mRNA-1	maker-scf300000870613.1-snap-gene-0.126-mRNA-1	maker-scf300000870601.0-snap-gene-17.75-mRNA-1	maker-scf300000870601.0-snap-gene-7.115-mRNA-1	maker-scf300000870641.0-snap-gene-2.123-mRNA-1	snap_masked-scf300000870746.0-processed-gene-13.118-mRNA-1	maker-scf300000870599.0-snap-gene-1.167-mRNA-1	maker-scf300000870641.0-snap-gene-2.128-mRNA-1	maker-scf300000870631.0-snap-gene-2.22-mRNA-1	maker-scf300000870744.1-snap-gene-1.79-mRNA-1	maker-scf300000870593.0-snap-gene-7.112-mRNA-1	maker-scf300000870662.0-snap-gene-7.80-mRNA-1	maker-scf300000870601.1-snap-gene-2.52-mRNA-1	maker-scf300000870603.0-snap-gene-10.0-mRNA-1	maker-scf300000870603.0-snap-gene-13.62-mRNA-1	maker-scf300000870603.0-snap-gene-18.101-mRNA-1
	maker-scf300000870745.0-snap-gene-0.62-mRNA-1	maker-scf300000870735.0-snap-gene-8.130-mRNA-1	maker-scf300000870662.0-snap-gene-5.130-mRNA-1	maker-scf300000870749.0-snap-gene-13.88-mRNA-1	maker-scf300000870601.0-snap-gene-10.116-mRNA-1	maker-scf300000870601.1-snap-gene-6.103-mRNA-1	maker-scf300000870595.0-snap-gene-4.36-mRNA-1	maker-scf300000870651.1-snap-gene-2.70-mRNA-1	maker-scf300000870599.0-snap-gene-1.158-mRNA-1	maker-scf300000870613.1-snap-gene-0.127-mRNA-1	maker-scf300000870601.0-snap-gene-17.78-mRNA-1	maker-scf300000870601.0-snap-gene-7.119-mRNA-1	maker-scf300000870641.0-snap-gene-2.128-mRNA-1	snap_masked-scf300000870746.0-processed-gene-3.58-mRNA-1	maker-scf300000870599.0-snap-gene-1.171-mRNA-1	maker-scf300000870642.0-snap-gene-0.1-mRNA-1	maker-scf300000870631.0-snap-gene-3.74-mRNA-1	maker-scf300000870744.1-snap-gene-2.59-mRNA-1	maker-scf300000870593.0-snap-gene-7.121-mRNA-1	maker-scf300000870662.0-snap-gene-7.82-mRNA-1	maker-scf300000870601.1-snap-gene-3.53-mRNA-1	maker-scf300000870603.0-snap-gene-10.20-mRNA-1	maker-scf300000870603.0-snap-gene-14.132-mRNA-1	maker-scf300000870603.0-snap-gene-18.117-mRNA-1
	maker-scf300000870745.0-snap-gene-2.57-mRNA-1	maker-scf300000870735.0-snap-gene-9.60-mRNA-1	maker-scf300000870662.0-snap-gene-6.2-mRNA-1	maker-scf300000870749.0-snap-gene-14.108-mRNA-1	maker-scf300000870601.0-snap-gene-10.118-mRNA-1	maker-scf300000870603.0-augustus-gene-0.82-mRNA-1	maker-scf300000870595.0-snap-gene-5.52-mRNA-1	maker-scf300000870651.1-snap-gene-2.79-mRNA-1	maker-scf300000870599.0-snap-gene-1.159-mRNA-1	maker-scf300000870613.1-snap-gene-0.136-mRNA-1	maker-scf300000870601.0-snap-gene-19.33-mRNA-1	maker-scf300000870601.0-snap-gene-8.118-mRNA-1	maker-scf300000870641.1-snap-gene-0.11-mRNA-1	snap_masked-scf300000870746.0-processed-gene-6.106-mRNA-1	maker-scf300000870599.0-snap-gene-1.188-mRNA-1	maker-scf300000870651.0-snap-gene-0.52-mRNA-1	maker-scf300000870631.0-snap-gene-3.87-mRNA-1	maker-scf300000870744.1-snap-gene-3.21-mRNA-1	maker-scf300000870595.0-augustus-gene-2.148-mRNA-1	maker-scf300000870673.1-snap-gene-0.15-mRNA-1	maker-scf300000870601.1-snap-gene-3.54-mRNA-1	maker-scf300000870603.0-snap-gene-10.23-mRNA-1	maker-scf300000870603.0-snap-gene-16.79-mRNA-1	maker-scf300000870603.0-snap-gene-5.7-mRNA-1
	maker-scf300000870746.0-augustus-gene-13.8-mRNA-1	maker-scf300000870735.0-snap-gene-9.67-mRNA-1	maker-scf300000870662.0-snap-gene-7.69-mRNA-1	maker-scf300000870749.0-snap-gene-15.107-mRNA-1	maker-scf300000870601.0-snap-gene-11.21-mRNA-1	maker-scf300000870603.0-augustus-gene-14.10-mRNA-1	maker-scf300000870595.0-snap-gene-6.217-mRNA-1	maker-scf300000870651.1-snap-gene-4.70-mRNA-1	maker-scf300000870599.0-snap-gene-1.160-mRNA-1	maker-scf300000870613.1-snap-gene-0.152-mRNA-1	maker-scf300000870601.0-snap-gene-19.38-mRNA-1	maker-scf300000870601.0-snap-gene-8.120-mRNA-1	maker-scf300000870641.1-snap-gene-0.24-mRNA-1	snap_masked-scf300000870746.0-processed-gene-6.97-mRNA-1	maker-scf300000870601.0-augustus-gene-6.83-mRNA-1	maker-scf300000870651.1-augustus-gene-1.117-mRNA-1	maker-scf300000870631.0-snap-gene-3.88-mRNA-1	maker-scf300000870744.1-snap-gene-4.60-mRNA-1	maker-scf300000870595.0-augustus-gene-3.129-mRNA-1	maker-scf300000870673.1-snap-gene-0.18-mRNA-1	maker-scf300000870601.1-snap-gene-4.129-mRNA-1	maker-scf300000870603.0-snap-gene-10.28-mRNA-1	maker-scf300000870603.0-snap-gene-17.11-mRNA-1	maker-scf300000870603.0-snap-gene-6.51-mRNA-1
	maker-scf300000870746.0-snap-gene-0.56-mRNA-1	maker-scf300000870743.0-snap-gene-0.53-mRNA-1	maker-scf300000870662.0-snap-gene-7.70-mRNA-1	maker-scf300000870749.0-snap-gene-16.62-mRNA-1	maker-scf300000870601.0-snap-gene-11.22-mRNA-1	maker-scf300000870603.0-augustus-gene-2.101-mRNA-1	maker-scf300000870595.0-snap-gene-6.224-mRNA-1	maker-scf300000870651.1-snap-gene-4.80-mRNA-1	maker-scf300000870599.0-snap-gene-1.192-mRNA-1	maker-scf300000870613.1-snap-gene-0.163-mRNA-1	maker-scf300000870601.0-snap-gene-19.7-mRNA-1	maker-scf300000870601.1-snap-gene-1.55-mRNA-1	maker-scf300000870641.1-snap-gene-0.9-mRNA-1	snap_masked-scf300000870746.0-processed-gene-9.135-mRNA-1	maker-scf300000870601.0-snap-gene-1.50-mRNA-1	maker-scf300000870651.1-snap-gene-2.62-mRNA-1	maker-scf300000870631.0-snap-gene-3.98-mRNA-1	maker-scf300000870744.1-snap-gene-5.28-mRNA-1	maker-scf300000870595.0-snap-gene-0.18-mRNA-1	maker-scf300000870673.1-snap-gene-1.182-mRNA-1	maker-scf300000870601.1-snap-gene-4.147-mRNA-1	maker-scf300000870603.0-snap-gene-10.3-mRNA-1	maker-scf300000870603.0-snap-gene-18.102-mRNA-1	maker-scf300000870603.0-snap-gene-6.54-mRNA-1
	maker-scf300000870746.0-snap-gene-11.136-mRNA-1	maker-scf300000870743.0-snap-gene-1.75-mRNA-1	maker-scf300000870662.0-snap-gene-9.74-mRNA-1	maker-scf300000870749.0-snap-gene-18.115-mRNA-1	maker-scf300000870601.0-snap-gene-12.60-mRNA-1	maker-scf300000870603.0-snap-gene-0.1-mRNA-1	maker-scf300000870595.0-snap-gene-6.232-mRNA-1	maker-scf300000870651.1-snap-gene-5.126-mRNA-1	maker-scf300000870601.0-augustus-gene-10.45-mRNA-1	maker-scf300000870614.0-snap-gene-0.4-mRNA-1	maker-scf300000870601.0-snap-gene-3.68-mRNA-1	maker-scf300000870601.1-snap-gene-3.67-mRNA-1	maker-scf300000870642.0-snap-gene-0.13-mRNA-1	snap_masked-scf300000870748.0-processed-gene-0.78-mRNA-1	maker-scf300000870601.0-snap-gene-10.102-mRNA-1	maker-scf300000870651.1-snap-gene-3.64-mRNA-1	maker-scf300000870631.0-snap-gene-4.57-mRNA-1	maker-scf300000870745.0-snap-gene-0.48-mRNA-1	maker-scf300000870595.0-snap-gene-1.46-mRNA-1	maker-scf300000870673.1-snap-gene-1.202-mRNA-1	maker-scf300000870601.1-snap-gene-5.4-mRNA-1	maker-scf300000870603.0-snap-gene-11.61-mRNA-1	maker-scf300000870603.0-snap-gene-18.117-mRNA-1	maker-scf300000870603.0-snap-gene-6.59-mRNA-1
	maker-scf300000870746.0-snap-gene-11.141-mRNA-1	maker-scf300000870743.0-snap-gene-2.18-mRNA-1	maker-scf300000870673.0-snap-gene-0.92-mRNA-1	maker-scf300000870749.0-snap-gene-2.5-mRNA-1	maker-scf300000870601.0-snap-gene-12.73-mRNA-1	maker-scf300000870603.0-snap-gene-0.17-mRNA-1	maker-scf300000870595.0-snap-gene-6.234-mRNA-1	maker-scf300000870651.1-snap-gene-5.130-mRNA-1	maker-scf300000870601.0-augustus-gene-13.120-mRNA-1	maker-scf300000870619.2-augustus-gene-3.84-mRNA-1	maker-scf300000870601.0-snap-gene-4.14-mRNA-1	maker-scf300000870601.1-snap-gene-3.70-mRNA-1	maker-scf300000870642.2-snap-gene-0.47-mRNA-1	snap_masked-scf300000870748.0-processed-gene-0.81-mRNA-1	maker-scf300000870601.0-snap-gene-11.21-mRNA-1	maker-scf300000870651.1-snap-gene-3.73-mRNA-1	maker-scf300000870631.0-snap-gene-4.58-mRNA-1	maker-scf300000870745.0-snap-gene-1.12-mRNA-1	maker-scf300000870595.0-snap-gene-3.54-mRNA-1	maker-scf300000870673.1-snap-gene-1.203-mRNA-1	maker-scf300000870601.1-snap-gene-6.113-mRNA-1	maker-scf300000870603.0-snap-gene-11.65-mRNA-1	maker-scf300000870603.0-snap-gene-3.64-mRNA-1	maker-scf300000870603.0-snap-gene-8.10-mRNA-1
	maker-scf300000870746.0-snap-gene-13.170-mRNA-1	maker-scf300000870743.0-snap-gene-2.21-mRNA-1	maker-scf300000870673.1-snap-gene-1.218-mRNA-1	maker-scf300000870749.0-snap-gene-5.66-mRNA-1	maker-scf300000870601.0-snap-gene-12.79-mRNA-1	maker-scf300000870603.0-snap-gene-1.114-mRNA-1	maker-scf300000870595.0-snap-gene-6.238-mRNA-1	maker-scf300000870651.1-snap-gene-6.108-mRNA-1	maker-scf300000870601.0-snap-gene-1.55-mRNA-1	maker-scf300000870619.2-snap-gene-0.46-mRNA-1	maker-scf300000870601.0-snap-gene-4.26-mRNA-1	maker-scf300000870603.0-augustus-gene-8.83-mRNA-1	maker-scf300000870651.0-snap-gene-0.41-mRNA-1	snap_masked-scf300000870748.0-processed-gene-2.80-mRNA-1	maker-scf300000870601.0-snap-gene-11.27-mRNA-1	maker-scf300000870651.1-snap-gene-4.72-mRNA-1	maker-scf300000870631.0-snap-gene-5.113-mRNA-1	maker-scf300000870746.0-snap-gene-10.64-mRNA-1	maker-scf300000870595.0-snap-gene-3.72-mRNA-1	maker-scf300000870673.1-snap-gene-1.205-mRNA-1	maker-scf300000870601.1-snap-gene-6.145-mRNA-1	maker-scf300000870603.0-snap-gene-11.85-mRNA-1	maker-scf300000870603.0-snap-gene-3.80-mRNA-1	maker-scf300000870603.0-snap-gene-8.17-mRNA-1
	maker-scf300000870746.0-snap-gene-13.174-mRNA-1	maker-scf300000870743.0-snap-gene-2.39-mRNA-1	maker-scf300000870673.2-snap-gene-1.52-mRNA-1	maker-scf300000870749.1-snap-gene-0.116-mRNA-1	maker-scf300000870601.0-snap-gene-12.85-mRNA-1	maker-scf300000870603.0-snap-gene-12.152-mRNA-1	maker-scf300000870595.1-snap-gene-0.100-mRNA-1	maker-scf300000870651.1-snap-gene-6.121-mRNA-1	maker-scf300000870601.0-snap-gene-1.60-mRNA-1	maker-scf300000870619.2-snap-gene-0.63-mRNA-1	maker-scf300000870601.0-snap-gene-4.27-mRNA-1	maker-scf300000870603.0-snap-gene-11.83-mRNA-1	maker-scf300000870651.1-snap-gene-0.61-mRNA-1	snap_masked-scf300000870748.0-processed-gene-3.36-mRNA-1	maker-scf300000870601.0-snap-gene-12.67-mRNA-1	maker-scf300000870662.0-augustus-gene-2.10-mRNA-1	maker-scf300000870631.0-snap-gene-5.117-mRNA-1	maker-scf300000870746.0-snap-gene-11.127-mRNA-1	maker-scf300000870595.0-snap-gene-4.0-mRNA-1	maker-scf300000870673.2-snap-gene-1.55-mRNA-1	maker-scf300000870603.0-augustus-gene-14.10-mRNA-1	maker-scf300000870603.0-snap-gene-12.115-mRNA-1	maker-scf300000870603.0-snap-gene-5.12-mRNA-1	maker-scf300000870603.0-snap-gene-8.25-mRNA-1
	maker-scf300000870746.0-snap-gene-2.57-mRNA-1	maker-scf300000870743.0-snap-gene-5.15-mRNA-1	maker-scf300000870673.2-snap-gene-10.137-mRNA-1	maker-scf300000870749.1-snap-gene-0.133-mRNA-1	maker-scf300000870601.0-snap-gene-12.89-mRNA-1	maker-scf300000870603.0-snap-gene-12.154-mRNA-1	maker-scf300000870595.1-snap-gene-1.121-mRNA-1	maker-scf300000870651.1-snap-gene-6.94-mRNA-1	maker-scf300000870601.0-snap-gene-1.74-mRNA-1	maker-scf300000870619.2-snap-gene-1.62-mRNA-1	maker-scf300000870601.0-snap-gene-4.28-mRNA-1	maker-scf300000870603.0-snap-gene-12.116-mRNA-1	maker-scf300000870651.1-snap-gene-2.69-mRNA-1	snap_masked-scf300000870748.0-processed-gene-4.105-mRNA-1	maker-scf300000870601.0-snap-gene-12.71-mRNA-1	maker-scf300000870662.0-snap-gene-10.15-mRNA-1	maker-scf300000870635.0-snap-gene-0.196-mRNA-1	maker-scf300000870746.0-snap-gene-2.65-mRNA-1	maker-scf300000870595.0-snap-gene-4.9-mRNA-1	maker-scf300000870673.2-snap-gene-10.150-mRNA-1	maker-scf300000870603.0-snap-gene-0.0-mRNA-1	maker-scf300000870603.0-snap-gene-12.121-mRNA-1	maker-scf300000870603.0-snap-gene-7.6-mRNA-1	maker-scf300000870603.0-snap-gene-8.34-mRNA-1
	maker-scf300000870746.0-snap-gene-7.51-mRNA-1	maker-scf300000870743.0-snap-gene-6.30-mRNA-1	maker-scf300000870673.2-snap-gene-12.74-mRNA-1	maker-scf300000870750.0-snap-gene-1.11-mRNA-1	maker-scf300000870601.0-snap-gene-14.68-mRNA-1	maker-scf300000870603.0-snap-gene-13.61-mRNA-1	maker-scf300000870595.1-snap-gene-1.131-mRNA-1	maker-scf300000870662.0-snap-gene-1.4-mRNA-1	maker-scf300000870601.0-snap-gene-10.113-mRNA-1	maker-scf300000870619.2-snap-gene-1.70-mRNA-1	maker-scf300000870601.0-snap-gene-4.29-mRNA-1	maker-scf300000870603.0-snap-gene-12.134-mRNA-1	maker-scf300000870651.1-snap-gene-2.79-mRNA-1	snap_masked-scf300000870749.0-processed-gene-10.26-mRNA-1	maker-scf300000870601.0-snap-gene-12.80-mRNA-1	maker-scf300000870662.0-snap-gene-12.85-mRNA-1	maker-scf300000870641.0-snap-gene-0.50-mRNA-1	maker-scf300000870746.0-snap-gene-3.11-mRNA-1	maker-scf300000870595.0-snap-gene-6.207-mRNA-1	maker-scf300000870673.2-snap-gene-12.59-mRNA-1	maker-scf300000870603.0-snap-gene-0.6-mRNA-1	maker-scf300000870603.0-snap-gene-13.56-mRNA-1	maker-scf300000870603.0-snap-gene-8.4-mRNA-1	maker-scf300000870603.0-snap-gene-9.113-mRNA-1
	maker-scf300000870746.0-snap-gene-7.61-mRNA-1	maker-scf300000870743.0-snap-gene-6.37-mRNA-1	maker-scf300000870673.2-snap-gene-12.77-mRNA-1	maker-scf300000870750.0-snap-gene-1.3-mRNA-1	maker-scf300000870601.0-snap-gene-15.101-mRNA-1	maker-scf300000870603.0-snap-gene-14.117-mRNA-1	maker-scf300000870595.1-snap-gene-2.112-mRNA-1	maker-scf300000870662.0-snap-gene-10.20-mRNA-1	maker-scf300000870601.0-snap-gene-10.114-mRNA-1	maker-scf300000870619.2-snap-gene-2.1-mRNA-1	maker-scf300000870601.0-snap-gene-5.88-mRNA-1	maker-scf300000870603.0-snap-gene-12.152-mRNA-1	maker-scf300000870651.1-snap-gene-4.70-mRNA-1	snap_masked-scf300000870749.0-processed-gene-17.60-mRNA-1	maker-scf300000870601.0-snap-gene-12.82-mRNA-1	maker-scf300000870662.0-snap-gene-2.128-mRNA-1	maker-scf300000870641.0-snap-gene-0.56-mRNA-1	maker-scf300000870746.0-snap-gene-4.60-mRNA-1	maker-scf300000870595.0-snap-gene-6.211-mRNA-1	maker-scf300000870673.2-snap-gene-12.68-mRNA-1	maker-scf300000870603.0-snap-gene-10.3-mRNA-1	maker-scf300000870603.0-snap-gene-13.72-mRNA-1	maker-scf300000870603.0-snap-gene-9.119-mRNA-1	maker-scf300000870603.0-snap-gene-9.117-mRNA-1
	maker-scf300000870746.0-snap-gene-7.66-mRNA-1	maker-scf300000870744.0-snap-gene-0.51-mRNA-1	maker-scf300000870673.2-snap-gene-13.63-mRNA-1	maker-scf300000870750.0-snap-gene-1.5-mRNA-1	maker-scf300000870601.0-snap-gene-15.106-mRNA-1	maker-scf300000870603.0-snap-gene-14.118-mRNA-1	maker-scf300000870595.1-snap-gene-2.113-mRNA-1	maker-scf300000870662.0-snap-gene-11.24-mRNA-1	maker-scf300000870601.0-snap-gene-10.116-mRNA-1	maker-scf300000870619.2-snap-gene-3.131-mRNA-1	maker-scf300000870601.0-snap-gene-6.51-mRNA-1	maker-scf300000870603.0-snap-gene-13.53-mRNA-1	maker-scf300000870651.1-snap-gene-4.80-mRNA-1	snap_masked-scf300000870749.0-processed-gene-2.61-mRNA-1	maker-scf300000870601.0-snap-gene-13.17-mRNA-1	maker-scf300000870662.0-snap-gene-2.149-mRNA-1	maker-scf300000870641.0-snap-gene-0.57-mRNA-1	maker-scf300000870746.0-snap-gene-8.67-mRNA-1	maker-scf300000870595.0-snap-gene-6.214-mRNA-1	maker-scf300000870673.2-snap-gene-12.77-mRNA-1	maker-scf300000870603.0-snap-gene-11.71-mRNA-1	maker-scf300000870603.0-snap-gene-13.75-mRNA-1	maker-scf300000870605.0-snap-gene-0.127-mRNA-1	maker-scf300000870603.0-snap-gene-9.147-mRNA-1
	maker-scf300000870746.0-snap-gene-9.79-mRNA-1	maker-scf300000870744.0-snap-gene-0.65-mRNA-1	maker-scf300000870673.2-snap-gene-14.61-mRNA-1	maker-scf300000870750.0-snap-gene-4.117-mRNA-1	maker-scf300000870601.0-snap-gene-15.108-mRNA-1	maker-scf300000870603.0-snap-gene-16.71-mRNA-1	maker-scf300000870595.1-snap-gene-2.125-mRNA-1	maker-scf300000870662.0-snap-gene-2.156-mRNA-1	maker-scf300000870601.0-snap-gene-11.18-mRNA-1	maker-scf300000870619.2-snap-gene-4.82-mRNA-1	maker-scf300000870601.0-snap-gene-6.53-mRNA-1	maker-scf300000870603.0-snap-gene-13.59-mRNA-1	maker-scf300000870651.1-snap-gene-5.126-mRNA-1	snap_masked-scf300000870749.0-processed-gene-2.80-mRNA-1	maker-scf300000870601.0-snap-gene-13.5-mRNA-1	maker-scf300000870662.0-snap-gene-4.66-mRNA-1	maker-scf300000870641.0-snap-gene-0.59-mRNA-1	maker-scf300000870748.0-snap-gene-1.61-mRNA-1	maker-scf300000870595.1-augustus-gene-0.46-mRNA-1	maker-scf300000870673.2-snap-gene-12.86-mRNA-1	maker-scf300000870603.0-snap-gene-11.79-mRNA-1	maker-scf300000870603.0-snap-gene-14.118-mRNA-1	maker-scf300000870605.0-snap-gene-0.141-mRNA-1	maker-scf300000870603.1-snap-gene-0.62-mRNA-1
	maker-scf300000870748.0-augustus-gene-2.86-mRNA-1	maker-scf300000870744.0-snap-gene-2.108-mRNA-1	maker-scf300000870673.2-snap-gene-14.71-mRNA-1	maker-scf300000870750.0-snap-gene-4.151-mRNA-1	maker-scf300000870601.0-snap-gene-15.111-mRNA-1	maker-scf300000870603.0-snap-gene-17.14-mRNA-1	maker-scf300000870595.1-snap-gene-2.136-mRNA-1	maker-scf300000870662.0-snap-gene-3.56-mRNA-1	maker-scf300000870601.0-snap-gene-11.2-mRNA-1	maker-scf300000870626.0-snap-gene-0.48-mRNA-1	maker-scf300000870601.0-snap-gene-6.56-mRNA-1	maker-scf300000870603.0-snap-gene-13.75-mRNA-1	maker-scf300000870651.1-snap-gene-5.140-mRNA-1	snap_masked-scf300000870749.0-processed-gene-3.33-mRNA-1	maker-scf300000870601.0-snap-gene-14.59-mRNA-1	maker-scf300000870662.0-snap-gene-4.77-mRNA-1	maker-scf300000870641.0-snap-gene-1.13-mRNA-1	maker-scf300000870748.0-snap-gene-3.26-mRNA-1	maker-scf300000870595.1-snap-gene-1.122-mRNA-1	maker-scf300000870673.2-snap-gene-14.60-mRNA-1	maker-scf300000870603.0-snap-gene-12.115-mRNA-1	maker-scf300000870603.0-snap-gene-16.58-mRNA-1	maker-scf300000870607.0-snap-gene-0.9-mRNA-1	maker-scf300000870603.1-snap-gene-0.70-mRNA-1
	maker-scf300000870748.0-snap-gene-3.24-mRNA-1	maker-scf300000870744.0-snap-gene-2.113-mRNA-1	maker-scf300000870673.2-snap-gene-14.97-mRNA-1	maker-scf300000870751.0-snap-gene-1.101-mRNA-1	maker-scf300000870601.0-snap-gene-17.75-mRNA-1	maker-scf300000870603.0-snap-gene-17.18-mRNA-1	maker-scf300000870595.1-snap-gene-2.139-mRNA-1	maker-scf300000870662.0-snap-gene-3.66-mRNA-1	maker-scf300000870601.0-snap-gene-11.4-mRNA-1	maker-scf300000870626.0-snap-gene-0.59-mRNA-1	maker-scf300000870601.0-snap-gene-6.67-mRNA-1	maker-scf300000870603.0-snap-gene-14.117-mRNA-1	maker-scf300000870651.1-snap-gene-6.125-mRNA-1	snap_masked-scf300000870749.0-processed-gene-4.81-mRNA-1	maker-scf300000870601.0-snap-gene-14.68-mRNA-1	maker-scf300000870662.0-snap-gene-5.135-mRNA-1	maker-scf300000870641.0-snap-gene-1.37-mRNA-1	maker-scf300000870748.0-snap-gene-3.33-mRNA-1	maker-scf300000870595.1-snap-gene-1.136-mRNA-1	maker-scf300000870673.2-snap-gene-15.109-mRNA-1	maker-scf300000870603.0-snap-gene-13.56-mRNA-1	maker-scf300000870603.0-snap-gene-16.62-mRNA-1	maker-scf300000870607.0-snap-gene-1.14-mRNA-1	maker-scf300000870603.1-snap-gene-0.77-mRNA-1
	maker-scf300000870748.0-snap-gene-4.166-mRNA-1	maker-scf300000870744.0-snap-gene-2.125-mRNA-1	maker-scf300000870673.2-snap-gene-15.110-mRNA-1	maker-scf300000870752.0-snap-gene-2.7-mRNA-1	maker-scf300000870601.0-snap-gene-18.56-mRNA-1	maker-scf300000870603.0-snap-gene-17.20-mRNA-1	maker-scf300000870595.1-snap-gene-2.145-mRNA-1	maker-scf300000870662.0-snap-gene-3.70-mRNA-1	maker-scf300000870601.0-snap-gene-12.60-mRNA-1	maker-scf300000870629.0-snap-gene-1.89-mRNA-1	maker-scf300000870601.0-snap-gene-6.68-mRNA-1	maker-scf300000870603.0-snap-gene-14.130-mRNA-1	maker-scf300000870651.1-snap-gene-6.127-mRNA-1	snap_masked-scf300000870749.0-processed-gene-7.37-mRNA-1	maker-scf300000870601.0-snap-gene-14.75-mRNA-1	maker-scf300000870662.0-snap-gene-6.14-mRNA-1	maker-scf300000870641.0-snap-gene-2.122-mRNA-1	maker-scf300000870748.0-snap-gene-4.184-mRNA-1	maker-scf300000870595.1-snap-gene-2.115-mRNA-1	maker-scf300000870673.2-snap-gene-2.15-mRNA-1	maker-scf300000870603.0-snap-gene-13.72-mRNA-1	maker-scf300000870603.0-snap-gene-17.19-mRNA-1	maker-scf300000870607.0-snap-gene-1.16-mRNA-1	maker-scf300000870603.1-snap-gene-0.78-mRNA-1
	maker-scf300000870748.0-snap-gene-4.204-mRNA-1	maker-scf300000870744.1-snap-gene-1.79-mRNA-1	maker-scf300000870673.2-snap-gene-2.18-mRNA-1	maker-scf300000870752.0-snap-gene-6.96-mRNA-1	maker-scf300000870601.0-snap-gene-18.61-mRNA-1	maker-scf300000870603.0-snap-gene-18.119-mRNA-1	maker-scf300000870595.1-snap-gene-2.148-mRNA-1	maker-scf300000870662.0-snap-gene-5.138-mRNA-1	maker-scf300000870601.0-snap-gene-12.70-mRNA-1	maker-scf300000870629.0-snap-gene-2.50-mRNA-1	maker-scf300000870601.0-snap-gene-7.117-mRNA-1	maker-scf300000870603.0-snap-gene-16.60-mRNA-1	maker-scf300000870662.0-snap-gene-1.7-mRNA-1	snap_masked-scf300000870749.0-processed-gene-8.59-mRNA-1	maker-scf300000870601.0-snap-gene-14.78-mRNA-1	maker-scf300000870662.0-snap-gene-6.3-mRNA-1	maker-scf300000870641.0-snap-gene-2.126-mRNA-1	maker-scf300000870749.0-augustus-gene-2.165-mRNA-1	maker-scf300000870595.1-snap-gene-2.119-mRNA-1	maker-scf300000870673.2-snap-gene-2.16-mRNA-1	maker-scf300000870603.0-snap-gene-13.73-mRNA-1	maker-scf300000870603.0-snap-gene-18.101-mRNA-1	maker-scf300000870607.1-snap-gene-0.3-mRNA-1	maker-scf300000870605.0-snap-gene-0.123-mRNA-1
	maker-scf300000870749.0-snap-gene-10.15-mRNA-1	maker-scf300000870744.1-snap-gene-1.86-mRNA-1	maker-scf300000870673.2-snap-gene-4.81-mRNA-1	maker-scf300000870752.1-snap-gene-1.102-mRNA-1	maker-scf300000870601.0-snap-gene-18.66-mRNA-1	maker-scf300000870603.0-snap-gene-2.3-mRNA-1	maker-scf300000870595.1-snap-gene-2.149-mRNA-1	maker-scf300000870662.0-snap-gene-5.142-mRNA-1	maker-scf300000870601.0-snap-gene-12.81-mRNA-1	maker-scf300000870630.0-snap-gene-0.7-mRNA-1	maker-scf300000870601.0-snap-gene-7.119-mRNA-1	maker-scf300000870603.0-snap-gene-16.78-mRNA-1	maker-scf300000870662.0-snap-gene-1.8-mRNA-1	snap_masked-scf300000870750.0-processed-gene-1.68-mRNA-1	maker-scf300000870601.0-snap-gene-15.108-mRNA-1	maker-scf300000870673.0-snap-gene-0.93-mRNA-1	maker-scf300000870641.0-snap-gene-2.128-mRNA-1	maker-scf300000870749.0-snap-gene-13.102-mRNA-1	maker-scf300000870595.1-snap-gene-2.129-mRNA-1	maker-scf300000870673.2-snap-gene-3.107-mRNA-1	maker-scf300000870603.0-snap-gene-14.123-mRNA-1	maker-scf300000870603.0-snap-gene-2.11-mRNA-1	maker-scf300000870611.0-snap-gene-0.131-mRNA-1	maker-scf300000870605.0-snap-gene-0.127-mRNA-1
	maker-scf300000870749.0-snap-gene-11.15-mRNA-1	maker-scf300000870744.1-snap-gene-5.23-mRNA-1	maker-scf300000870673.2-snap-gene-5.79-mRNA-1	maker-scf300000870753.0-snap-gene-1.103-mRNA-1	maker-scf300000870601.0-snap-gene-19.23-mRNA-1	maker-scf300000870603.0-snap-gene-2.9-mRNA-1	maker-scf300000870599.0-snap-gene-0.78-mRNA-1	maker-scf300000870662.0-snap-gene-5.143-mRNA-1	maker-scf300000870601.0-snap-gene-12.85-mRNA-1	maker-scf300000870631.0-augustus-gene-4.72-mRNA-1	maker-scf300000870601.0-snap-gene-7.126-mRNA-1	maker-scf300000870603.0-snap-gene-17.18-mRNA-1	maker-scf300000870662.0-snap-gene-11.6-mRNA-1	snap_masked-scf300000870750.0-processed-gene-4.235-mRNA-1	maker-scf300000870601.0-snap-gene-16.113-mRNA-1	maker-scf300000870673.1-snap-gene-1.191-mRNA-1	maker-scf300000870641.0-snap-gene-2.86-mRNA-1	maker-scf300000870749.0-snap-gene-14.108-mRNA-1	maker-scf300000870595.1-snap-gene-2.135-mRNA-1	maker-scf300000870673.2-snap-gene-3.109-mRNA-1	maker-scf300000870603.0-snap-gene-16.62-mRNA-1	maker-scf300000870603.0-snap-gene-3.80-mRNA-1	maker-scf300000870611.0-snap-gene-0.135-mRNA-1	maker-scf300000870605.0-snap-gene-0.156-mRNA-1
	maker-scf300000870749.0-snap-gene-12.28-mRNA-1	maker-scf300000870745.0-snap-gene-0.61-mRNA-1	maker-scf300000870673.2-snap-gene-9.110-mRNA-1	maker-scf300000870753.0-snap-gene-1.83-mRNA-1	maker-scf300000870601.0-snap-gene-19.38-mRNA-1	maker-scf300000870603.0-snap-gene-3.82-mRNA-1	maker-scf300000870599.0-snap-gene-0.84-mRNA-1	maker-scf300000870662.0-snap-gene-6.7-mRNA-1	maker-scf300000870601.0-snap-gene-13.14-mRNA-1	maker-scf300000870631.0-snap-gene-0.111-mRNA-1	maker-scf300000870601.0-snap-gene-7.130-mRNA-1	maker-scf300000870603.0-snap-gene-17.22-mRNA-1	maker-scf300000870662.0-snap-gene-3.68-mRNA-1	snap_masked-scf300000870750.0-processed-gene-4.264-mRNA-1	maker-scf300000870601.0-snap-gene-16.116-mRNA-1	maker-scf300000870673.2-snap-gene-1.49-mRNA-1	maker-scf300000870641.1-snap-gene-0.15-mRNA-1	maker-scf300000870749.0-snap-gene-16.69-mRNA-1	maker-scf300000870595.1-snap-gene-2.140-mRNA-1	maker-scf300000870673.2-snap-gene-4.57-mRNA-1	maker-scf300000870603.0-snap-gene-16.79-mRNA-1	maker-scf300000870603.0-snap-gene-4.109-mRNA-1	maker-scf300000870611.0-snap-gene-0.136-mRNA-1	maker-scf300000870607.0-snap-gene-0.1-mRNA-1
	maker-scf300000870749.0-snap-gene-13.101-mRNA-1	maker-scf300000870745.0-snap-gene-1.16-mRNA-1	maker-scf300000870693.1-snap-gene-1.108-mRNA-1	maker-scf300000870753.0-snap-gene-10.33-mRNA-1	maker-scf300000870601.0-snap-gene-19.49-mRNA-1	maker-scf300000870603.0-snap-gene-4.113-mRNA-1	maker-scf300000870599.0-snap-gene-1.141-mRNA-1	maker-scf300000870662.0-snap-gene-8.7-mRNA-1	maker-scf300000870601.0-snap-gene-13.9-mRNA-1	maker-scf300000870631.0-snap-gene-0.128-mRNA-1	maker-scf300000870601.0-snap-gene-8.116-mRNA-1	maker-scf300000870603.0-snap-gene-18.100-mRNA-1	maker-scf300000870662.0-snap-gene-3.76-mRNA-1	snap_masked-scf300000870752.0-processed-gene-2.33-mRNA-1	maker-scf300000870601.0-snap-gene-17.62-mRNA-1	maker-scf300000870673.2-snap-gene-1.55-mRNA-1	maker-scf300000870641.1-snap-gene-0.24-mRNA-1	maker-scf300000870749.0-snap-gene-18.148-mRNA-1	maker-scf300000870599.0-snap-gene-1.145-mRNA-1	maker-scf300000870673.2-snap-gene-4.68-mRNA-1	maker-scf300000870603.0-snap-gene-18.117-mRNA-1	maker-scf300000870603.0-snap-gene-4.117-mRNA-1	maker-scf300000870611.0-snap-gene-0.142-mRNA-1	maker-scf300000870607.0-snap-gene-0.10-mRNA-1
	maker-scf300000870749.0-snap-gene-15.115-mRNA-1	maker-scf300000870745.0-snap-gene-3.0-mRNA-1	maker-scf300000870693.1-snap-gene-4.59-mRNA-1	maker-scf300000870753.0-snap-gene-12.62-mRNA-1	maker-scf300000870601.0-snap-gene-2.121-mRNA-1	maker-scf300000870603.0-snap-gene-4.120-mRNA-1	maker-scf300000870599.0-snap-gene-1.147-mRNA-1	maker-scf300000870668.0-augustus-gene-0.7-mRNA-1	maker-scf300000870601.0-snap-gene-14.61-mRNA-1	maker-scf300000870631.0-snap-gene-1.68-mRNA-1	maker-scf300000870601.0-snap-gene-8.118-mRNA-1	maker-scf300000870603.0-snap-gene-18.108-mRNA-1	maker-scf300000870662.0-snap-gene-4.61-mRNA-1	snap_masked-scf300000870753.0-processed-gene-0.66-mRNA-1	maker-scf300000870601.0-snap-gene-17.74-mRNA-1	maker-scf300000870673.2-snap-gene-10.133-mRNA-1	maker-scf300000870641.1-snap-gene-0.9-mRNA-1	maker-scf300000870749.0-snap-gene-4.17-mRNA-1	maker-scf300000870599.0-snap-gene-1.159-mRNA-1	maker-scf300000870673.2-snap-gene-4.78-mRNA-1	maker-scf300000870603.0-snap-gene-18.124-mRNA-1	maker-scf300000870603.0-snap-gene-6.59-mRNA-1	maker-scf300000870613.1-snap-gene-0.124-mRNA-1	maker-scf300000870607.0-snap-gene-0.5-mRNA-1
	maker-scf300000870749.0-snap-gene-16.57-mRNA-1	maker-scf300000870745.0-snap-gene-3.41-mRNA-1	maker-scf300000870693.1-snap-gene-4.63-mRNA-1	maker-scf300000870753.0-snap-gene-13.117-mRNA-1	maker-scf300000870601.0-snap-gene-2.123-mRNA-1	maker-scf300000870603.0-snap-gene-5.12-mRNA-1	maker-scf300000870599.0-snap-gene-1.149-mRNA-1	maker-scf300000870673.0-snap-gene-0.77-mRNA-1	maker-scf300000870601.0-snap-gene-14.73-mRNA-1	maker-scf300000870631.0-snap-gene-3.73-mRNA-1	maker-scf300000870601.0-snap-gene-8.120-mRNA-1	maker-scf300000870603.0-snap-gene-18.116-mRNA-1	maker-scf300000870662.0-snap-gene-5.126-mRNA-1	snap_masked-scf300000870753.0-processed-gene-15.74-mRNA-1	maker-scf300000870601.0-snap-gene-17.76-mRNA-1	maker-scf300000870673.2-snap-gene-10.150-mRNA-1	maker-scf300000870642.0-snap-gene-0.15-mRNA-1	maker-scf300000870749.0-snap-gene-5.84-mRNA-1	maker-scf300000870599.0-snap-gene-1.161-mRNA-1	maker-scf300000870673.2-snap-gene-5.54-mRNA-1	maker-scf300000870603.0-snap-gene-2.11-mRNA-1	maker-scf300000870603.0-snap-gene-6.66-mRNA-1	maker-scf300000870613.1-snap-gene-0.159-mRNA-1	maker-scf300000870607.0-snap-gene-1.12-mRNA-1
	maker-scf300000870749.0-snap-gene-16.65-mRNA-1	maker-scf300000870745.0-snap-gene-3.46-mRNA-1	maker-scf300000870693.1-snap-gene-4.66-mRNA-1	maker-scf300000870753.0-snap-gene-14.0-mRNA-1	maker-scf300000870601.0-snap-gene-4.24-mRNA-1	maker-scf300000870603.0-snap-gene-5.13-mRNA-1	maker-scf300000870599.0-snap-gene-1.151-mRNA-1	maker-scf300000870673.1-snap-gene-1.215-mRNA-1	maker-scf300000870601.0-snap-gene-14.82-mRNA-1	maker-scf300000870631.0-snap-gene-3.74-mRNA-1	maker-scf300000870601.0-snap-gene-8.124-mRNA-1	maker-scf300000870603.0-snap-gene-18.91-mRNA-1	maker-scf300000870662.0-snap-gene-5.142-mRNA-1	snap_masked-scf300000870753.0-processed-gene-19.28-mRNA-1	maker-scf300000870601.0-snap-gene-18.56-mRNA-1	maker-scf300000870673.2-snap-gene-11.11-mRNA-1	maker-scf300000870642.2-snap-gene-0.44-mRNA-1	maker-scf300000870750.0-snap-gene-1.11-mRNA-1	maker-scf300000870599.0-snap-gene-1.171-mRNA-1	maker-scf300000870673.2-snap-gene-5.71-mRNA-1	maker-scf300000870603.0-snap-gene-3.80-mRNA-1	maker-scf300000870603.0-snap-gene-8.10-mRNA-1	maker-scf300000870619.2-snap-gene-0.54-mRNA-1	maker-scf300000870607.0-snap-gene-1.21-mRNA-1
	maker-scf300000870749.0-snap-gene-17.9-mRNA-1	maker-scf300000870746.0-snap-gene-1.11-mRNA-1	maker-scf300000870693.1-snap-gene-4.67-mRNA-1	maker-scf300000870753.0-snap-gene-14.1-mRNA-1	maker-scf300000870601.0-snap-gene-4.31-mRNA-1	maker-scf300000870603.0-snap-gene-5.21-mRNA-1	maker-scf300000870599.0-snap-gene-1.160-mRNA-1	maker-scf300000870673.2-snap-gene-0.7-mRNA-1	maker-scf300000870601.0-snap-gene-15.102-mRNA-1	maker-scf300000870631.0-snap-gene-3.81-mRNA-1	maker-scf300000870601.0-snap-gene-8.138-mRNA-1	maker-scf300000870603.0-snap-gene-2.13-mRNA-1	maker-scf300000870662.0-snap-gene-6.16-mRNA-1	snap_masked-scf300000870753.0-processed-gene-2.36-mRNA-1	maker-scf300000870601.0-snap-gene-18.63-mRNA-1	maker-scf300000870673.2-snap-gene-12.65-mRNA-1	maker-scf300000870642.2-snap-gene-0.46-mRNA-1	maker-scf300000870750.0-snap-gene-3.116-mRNA-1	maker-scf300000870599.0-snap-gene-1.183-mRNA-1	maker-scf300000870673.2-snap-gene-8.85-mRNA-1	maker-scf300000870603.0-snap-gene-5.19-mRNA-1	maker-scf300000870603.0-snap-gene-8.17-mRNA-1	maker-scf300000870619.2-snap-gene-1.57-mRNA-1	maker-scf300000870611.0-snap-gene-0.135-mRNA-1
	maker-scf300000870749.0-snap-gene-18.116-mRNA-1	maker-scf300000870746.0-snap-gene-10.71-mRNA-1	maker-scf300000870701.0-snap-gene-0.0-mRNA-1	maker-scf300000870753.0-snap-gene-15.135-mRNA-1	maker-scf300000870601.0-snap-gene-4.5-mRNA-1	maker-scf300000870603.0-snap-gene-6.54-mRNA-1	maker-scf300000870599.0-snap-gene-1.164-mRNA-1	maker-scf300000870673.2-snap-gene-12.60-mRNA-1	maker-scf300000870601.0-snap-gene-15.112-mRNA-1	maker-scf300000870631.0-snap-gene-4.51-mRNA-1	maker-scf300000870601.0-snap-gene-9.69-mRNA-1	maker-scf300000870603.0-snap-gene-2.14-mRNA-1	maker-scf300000870662.0-snap-gene-7.67-mRNA-1	snap_masked-scf300000870753.0-processed-gene-21.54-mRNA-1	maker-scf300000870601.0-snap-gene-18.67-mRNA-1	maker-scf300000870673.2-snap-gene-12.68-mRNA-1	maker-scf300000870642.2-snap-gene-0.48-mRNA-1	maker-scf300000870750.0-snap-gene-4.140-mRNA-1	maker-scf300000870599.0-snap-gene-1.192-mRNA-1	maker-scf300000870673.2-snap-gene-9.119-mRNA-1	maker-scf300000870603.0-snap-gene-5.2-mRNA-1	maker-scf300000870603.0-snap-gene-9.113-mRNA-1	maker-scf300000870619.2-snap-gene-1.67-mRNA-1	maker-scf300000870613.1-snap-gene-0.118-mRNA-1
	maker-scf300000870749.0-snap-gene-18.151-mRNA-1	maker-scf300000870746.0-snap-gene-11.123-mRNA-1	maker-scf300000870707.0-snap-gene-0.4-mRNA-1	maker-scf300000870753.0-snap-gene-15.149-mRNA-1	maker-scf300000870601.0-snap-gene-6.67-mRNA-1	maker-scf300000870603.0-snap-gene-6.59-mRNA-1	maker-scf300000870599.0-snap-gene-1.169-mRNA-1	maker-scf300000870673.2-snap-gene-13.60-mRNA-1	maker-scf300000870601.0-snap-gene-17.75-mRNA-1	maker-scf300000870631.0-snap-gene-5.116-mRNA-1	maker-scf300000870601.1-snap-gene-0.59-mRNA-1	maker-scf300000870603.0-snap-gene-2.8-mRNA-1	maker-scf300000870662.0-snap-gene-7.76-mRNA-1	snap_masked-scf300000870753.0-processed-gene-4.12-mRNA-1	maker-scf300000870601.0-snap-gene-18.71-mRNA-1	maker-scf300000870673.2-snap-gene-12.77-mRNA-1	maker-scf300000870651.1-snap-gene-0.59-mRNA-1	maker-scf300000870751.0-snap-gene-1.98-mRNA-1	maker-scf300000870601.0-snap-gene-10.102-mRNA-1	maker-scf300000870673.2-snap-gene-9.120-mRNA-1	maker-scf300000870603.0-snap-gene-6.50-mRNA-1	maker-scf300000870603.0-snap-gene-9.116-mRNA-1	maker-scf300000870619.2-snap-gene-2.14-mRNA-1	maker-scf300000870617.0-snap-gene-0.10-mRNA-1
	maker-scf300000870749.0-snap-gene-18.157-mRNA-1	maker-scf300000870746.0-snap-gene-12.125-mRNA-1	maker-scf300000870730.0-snap-gene-0.35-mRNA-1	maker-scf300000870753.0-snap-gene-16.19-mRNA-1	maker-scf300000870601.0-snap-gene-6.70-mRNA-1	maker-scf300000870603.0-snap-gene-6.64-mRNA-1	maker-scf300000870599.0-snap-gene-1.187-mRNA-1	maker-scf300000870673.2-snap-gene-14.71-mRNA-1	maker-scf300000870601.0-snap-gene-17.78-mRNA-1	maker-scf300000870631.0-snap-gene-5.120-mRNA-1	maker-scf300000870601.1-snap-gene-1.44-mRNA-1	maker-scf300000870603.0-snap-gene-2.9-mRNA-1	maker-scf300000870662.0-snap-gene-7.80-mRNA-1	snap_masked-scf300000870753.0-processed-gene-6.46-mRNA-1	maker-scf300000870601.0-snap-gene-19.20-mRNA-1	maker-scf300000870673.2-snap-gene-13.55-mRNA-1	maker-scf300000870651.1-snap-gene-0.61-mRNA-1	maker-scf300000870752.0-snap-gene-0.114-mRNA-1	maker-scf300000870601.0-snap-gene-10.113-mRNA-1	maker-scf300000870673.2-snap-gene-9.134-mRNA-1	maker-scf300000870603.0-snap-gene-8.17-mRNA-1	maker-scf300000870603.0-snap-gene-9.117-mRNA-1	maker-scf300000870621.0-snap-gene-0.3-mRNA-1	maker-scf300000870617.0-snap-gene-0.8-mRNA-1
	maker-scf300000870749.0-snap-gene-2.18-mRNA-1	maker-scf300000870746.0-snap-gene-8.78-mRNA-1	maker-scf300000870733.0-snap-gene-0.231-mRNA-1	maker-scf300000870753.0-snap-gene-17.13-mRNA-1	maker-scf300000870601.0-snap-gene-6.76-mRNA-1	maker-scf300000870603.0-snap-gene-9.123-mRNA-1	maker-scf300000870601.0-augustus-gene-6.83-mRNA-1	maker-scf300000870673.2-snap-gene-15.120-mRNA-1	maker-scf300000870601.0-snap-gene-19.29-mRNA-1	maker-scf300000870635.0-snap-gene-0.162-mRNA-1	maker-scf300000870601.1-snap-gene-3.55-mRNA-1	maker-scf300000870603.0-snap-gene-3.78-mRNA-1	maker-scf300000870662.0-snap-gene-7.82-mRNA-1	snap_masked-scf300000870753.0-processed-gene-8.107-mRNA-1	maker-scf300000870601.0-snap-gene-19.38-mRNA-1	maker-scf300000870673.2-snap-gene-14.64-mRNA-1	maker-scf300000870651.1-snap-gene-3.58-mRNA-1	maker-scf300000870752.0-snap-gene-1.91-mRNA-1	maker-scf300000870601.0-snap-gene-11.2-mRNA-1	maker-scf300000870681.0-snap-gene-0.55-mRNA-1	maker-scf300000870603.0-snap-gene-8.26-mRNA-1	maker-scf300000870603.0-snap-gene-9.118-mRNA-1	maker-scf300000870626.0-snap-gene-0.59-mRNA-1	maker-scf300000870619.2-snap-gene-0.54-mRNA-1
	maker-scf300000870749.0-snap-gene-3.10-mRNA-1	maker-scf300000870747.0-snap-gene-0.6-mRNA-1	maker-scf300000870733.0-snap-gene-0.235-mRNA-1	maker-scf300000870753.0-snap-gene-17.17-mRNA-1	maker-scf300000870601.0-snap-gene-7.117-mRNA-1	maker-scf300000870603.1-snap-gene-0.62-mRNA-1	maker-scf300000870601.0-snap-gene-10.104-mRNA-1	maker-scf300000870673.2-snap-gene-15.134-mRNA-1	maker-scf300000870601.0-snap-gene-19.38-mRNA-1	maker-scf300000870635.0-snap-gene-0.182-mRNA-1	maker-scf300000870601.1-snap-gene-3.63-mRNA-1	maker-scf300000870603.0-snap-gene-4.111-mRNA-1	maker-scf300000870662.0-snap-gene-8.8-mRNA-1	snap_masked-scf300000870753.0-processed-gene-8.93-mRNA-1	maker-scf300000870601.0-snap-gene-19.43-mRNA-1	maker-scf300000870673.2-snap-gene-2.16-mRNA-1	maker-scf300000870651.1-snap-gene-3.59-mRNA-1	maker-scf300000870752.0-snap-gene-1.95-mRNA-1	maker-scf300000870601.0-snap-gene-11.27-mRNA-1	maker-scf300000870681.0-snap-gene-0.56-mRNA-1	maker-scf300000870603.0-snap-gene-9.113-mRNA-1	maker-scf300000870603.0-snap-gene-9.128-mRNA-1	maker-scf300000870629.0-snap-gene-0.54-mRNA-1	maker-scf300000870619.2-snap-gene-1.66-mRNA-1
	maker-scf300000870749.0-snap-gene-7.2-mRNA-1	maker-scf300000870748.0-snap-gene-2.13-mRNA-1	maker-scf300000870735.0-snap-gene-0.103-mRNA-1	maker-scf300000870753.0-snap-gene-17.26-mRNA-1	maker-scf300000870601.0-snap-gene-7.125-mRNA-1	maker-scf300000870603.1-snap-gene-0.73-mRNA-1	maker-scf300000870601.0-snap-gene-10.107-mRNA-1	maker-scf300000870673.2-snap-gene-15.92-mRNA-1	maker-scf300000870601.0-snap-gene-19.7-mRNA-1	maker-scf300000870635.0-snap-gene-0.186-mRNA-1	maker-scf300000870601.1-snap-gene-3.67-mRNA-1	maker-scf300000870603.0-snap-gene-4.116-mRNA-1	maker-scf300000870673.1-snap-gene-1.181-mRNA-1	snap_masked-scf300000870753.0-processed-gene-9.73-mRNA-1	maker-scf300000870601.0-snap-gene-19.47-mRNA-1	maker-scf300000870673.2-snap-gene-2.20-mRNA-1	maker-scf300000870651.1-snap-gene-4.72-mRNA-1	maker-scf300000870752.0-snap-gene-6.101-mRNA-1	maker-scf300000870601.0-snap-gene-12.66-mRNA-1	maker-scf300000870693.1-snap-gene-3.30-mRNA-1	maker-scf300000870603.0-snap-gene-9.114-mRNA-1	maker-scf300000870603.0-snap-gene-9.141-mRNA-1	maker-scf300000870629.0-snap-gene-2.53-mRNA-1	maker-scf300000870619.2-snap-gene-1.68-mRNA-1
	maker-scf300000870749.0-snap-gene-7.6-mRNA-1	maker-scf300000870748.0-snap-gene-2.9-mRNA-1	maker-scf300000870735.0-snap-gene-0.108-mRNA-1	maker-scf300000870753.0-snap-gene-17.4-mRNA-1	maker-scf300000870601.0-snap-gene-7.130-mRNA-1	maker-scf300000870603.1-snap-gene-0.86-mRNA-1	maker-scf300000870601.0-snap-gene-10.110-mRNA-1	maker-scf300000870673.2-snap-gene-15.93-mRNA-1	maker-scf300000870601.0-snap-gene-19.9-mRNA-1	maker-scf300000870635.0-snap-gene-0.190-mRNA-1	maker-scf300000870601.1-snap-gene-6.126-mRNA-1	maker-scf300000870603.0-snap-gene-4.120-mRNA-1	maker-scf300000870673.1-snap-gene-1.187-mRNA-1	snap_masked-scf300000870754.0-processed-gene-1.23-mRNA-1	maker-scf300000870601.0-snap-gene-3.66-mRNA-1	maker-scf300000870673.2-snap-gene-3.107-mRNA-1	maker-scf300000870651.1-snap-gene-4.73-mRNA-1	maker-scf300000870752.0-snap-gene-6.122-mRNA-1	maker-scf300000870601.0-snap-gene-12.67-mRNA-1	maker-scf300000870693.1-snap-gene-3.42-mRNA-1	maker-scf300000870603.0-snap-gene-9.116-mRNA-1	maker-scf300000870603.0-snap-gene-9.144-mRNA-1	maker-scf300000870631.0-snap-gene-0.111-mRNA-1	maker-scf300000870619.2-snap-gene-2.14-mRNA-1
	maker-scf300000870749.0-snap-gene-7.8-mRNA-1	maker-scf300000870748.0-snap-gene-3.15-mRNA-1	maker-scf300000870735.0-snap-gene-0.99-mRNA-1	maker-scf300000870753.0-snap-gene-21.109-mRNA-1	maker-scf300000870601.0-snap-gene-8.113-mRNA-1	maker-scf300000870605.0-snap-gene-0.135-mRNA-1	maker-scf300000870601.0-snap-gene-10.115-mRNA-1	maker-scf300000870673.2-snap-gene-2.11-mRNA-1	maker-scf300000870601.0-snap-gene-2.115-mRNA-1	maker-scf300000870641.0-snap-gene-0.53-mRNA-1	maker-scf300000870601.1-snap-gene-6.129-mRNA-1	maker-scf300000870603.0-snap-gene-5.13-mRNA-1	maker-scf300000870673.1-snap-gene-1.203-mRNA-1		maker-scf300000870601.0-snap-gene-3.74-mRNA-1	maker-scf300000870673.2-snap-gene-3.125-mRNA-1	maker-scf300000870651.1-snap-gene-4.74-mRNA-1	maker-scf300000870752.0-snap-gene-6.96-mRNA-1	maker-scf300000870601.0-snap-gene-12.70-mRNA-1	maker-scf300000870693.1-snap-gene-3.47-mRNA-1	maker-scf300000870603.0-snap-gene-9.117-mRNA-1	maker-scf300000870603.0-snap-gene-9.147-mRNA-1	maker-scf300000870631.0-snap-gene-0.127-mRNA-1	maker-scf300000870619.2-snap-gene-3.110-mRNA-1
	maker-scf300000870749.0-snap-gene-7.9-mRNA-1	maker-scf300000870748.0-snap-gene-4.179-mRNA-1	maker-scf300000870735.0-snap-gene-1.14-mRNA-1	maker-scf300000870753.0-snap-gene-22.129-mRNA-1	maker-scf300000870601.0-snap-gene-8.126-mRNA-1	maker-scf300000870607.0-snap-gene-0.5-mRNA-1	maker-scf300000870601.0-snap-gene-10.116-mRNA-1	maker-scf300000870673.2-snap-gene-2.6-mRNA-1	maker-scf300000870601.0-snap-gene-3.68-mRNA-1	maker-scf300000870641.0-snap-gene-1.17-mRNA-1	maker-scf300000870601.1-snap-gene-6.137-mRNA-1	maker-scf300000870603.0-snap-gene-5.19-mRNA-1	maker-scf300000870673.1-snap-gene-1.215-mRNA-1		maker-scf300000870601.0-snap-gene-4.0-mRNA-1	maker-scf300000870673.2-snap-gene-4.68-mRNA-1	maker-scf300000870651.1-snap-gene-6.125-mRNA-1	maker-scf300000870752.1-augustus-gene-1.98-mRNA-1	maker-scf300000870601.0-snap-gene-12.71-mRNA-1	maker-scf300000870693.1-snap-gene-3.49-mRNA-1	maker-scf300000870603.0-snap-gene-9.141-mRNA-1	maker-scf300000870603.1-snap-gene-0.60-mRNA-1	maker-scf300000870631.0-snap-gene-0.129-mRNA-1	maker-scf300000870619.2-snap-gene-3.111-mRNA-1
	maker-scf300000870749.0-snap-gene-8.11-mRNA-1	maker-scf300000870748.0-snap-gene-4.184-mRNA-1	maker-scf300000870735.0-snap-gene-10.84-mRNA-1	maker-scf300000870753.0-snap-gene-24.68-mRNA-1	maker-scf300000870601.0-snap-gene-9.61-mRNA-1	maker-scf300000870607.1-snap-gene-0.3-mRNA-1	maker-scf300000870601.0-snap-gene-10.118-mRNA-1	maker-scf300000870673.2-snap-gene-4.81-mRNA-1	maker-scf300000870601.0-snap-gene-3.71-mRNA-1	maker-scf300000870641.0-snap-gene-1.30-mRNA-1	maker-scf300000870601.1-snap-gene-6.138-mRNA-1	maker-scf300000870603.0-snap-gene-5.21-mRNA-1	maker-scf300000870673.1-snap-gene-1.217-mRNA-1		maker-scf300000870601.0-snap-gene-4.24-mRNA-1	maker-scf300000870673.2-snap-gene-4.70-mRNA-1	maker-scf300000870651.1-snap-gene-6.127-mRNA-1	maker-scf300000870752.1-snap-gene-1.119-mRNA-1	maker-scf300000870601.0-snap-gene-12.80-mRNA-1	maker-scf300000870693.1-snap-gene-3.72-mRNA-1	maker-scf300000870603.0-snap-gene-9.147-mRNA-1	maker-scf300000870603.1-snap-gene-0.78-mRNA-1	maker-scf300000870631.0-snap-gene-1.58-mRNA-1	maker-scf300000870619.2-snap-gene-4.84-mRNA-1
	maker-scf300000870749.0-snap-gene-9.79-mRNA-1	maker-scf300000870749.0-snap-gene-10.5-mRNA-1	maker-scf300000870735.0-snap-gene-11.70-mRNA-1	maker-scf300000870753.0-snap-gene-25.72-mRNA-1	maker-scf300000870601.0-snap-gene-9.62-mRNA-1	maker-scf300000870611.0-snap-gene-0.133-mRNA-1	maker-scf300000870601.0-snap-gene-11.11-mRNA-1	maker-scf300000870673.2-snap-gene-5.62-mRNA-1	maker-scf300000870601.0-snap-gene-4.26-mRNA-1	maker-scf300000870641.0-snap-gene-2.102-mRNA-1	maker-scf300000870603.0-augustus-gene-10.111-mRNA-1	maker-scf300000870603.0-snap-gene-6.65-mRNA-1	maker-scf300000870673.2-snap-gene-0.1-mRNA-1		maker-scf300000870601.0-snap-gene-4.27-mRNA-1	maker-scf300000870673.2-snap-gene-4.79-mRNA-1	maker-scf300000870662.0-snap-gene-0.4-mRNA-1	maker-scf300000870752.1-snap-gene-1.122-mRNA-1	maker-scf300000870601.0-snap-gene-13.5-mRNA-1	maker-scf300000870693.1-snap-gene-4.46-mRNA-1	maker-scf300000870603.1-snap-gene-0.60-mRNA-1	maker-scf300000870605.0-snap-gene-0.123-mRNA-1	maker-scf300000870631.0-snap-gene-2.17-mRNA-1	maker-scf300000870626.0-snap-gene-0.63-mRNA-1
	maker-scf300000870749.1-snap-gene-0.139-mRNA-1	maker-scf300000870749.0-snap-gene-12.2-mRNA-1	maker-scf300000870735.0-snap-gene-12.61-mRNA-1	maker-scf300000870753.0-snap-gene-4.53-mRNA-1	maker-scf300000870601.0-snap-gene-9.72-mRNA-1	maker-scf300000870611.0-snap-gene-0.147-mRNA-1	maker-scf300000870601.0-snap-gene-11.22-mRNA-1	maker-scf300000870673.2-snap-gene-6.113-mRNA-1	maker-scf300000870601.0-snap-gene-4.28-mRNA-1	maker-scf300000870641.0-snap-gene-2.108-mRNA-1	maker-scf300000870603.0-augustus-gene-15.7-mRNA-1	maker-scf300000870603.0-snap-gene-7.10-mRNA-1	maker-scf300000870673.2-snap-gene-0.9-mRNA-1		maker-scf300000870601.0-snap-gene-4.29-mRNA-1	maker-scf300000870673.2-snap-gene-5.54-mRNA-1	maker-scf300000870662.0-snap-gene-1.0-mRNA-1	maker-scf300000870753.0-augustus-gene-25.82-mRNA-1	maker-scf300000870601.0-snap-gene-14.75-mRNA-1	maker-scf300000870693.1-snap-gene-4.47-mRNA-1	maker-scf300000870603.1-snap-gene-0.78-mRNA-1	maker-scf300000870607.0-snap-gene-1.1-mRNA-1	maker-scf300000870631.0-snap-gene-2.18-mRNA-1	maker-scf300000870629.0-snap-gene-0.53-mRNA-1
	maker-scf300000870749.1-snap-gene-0.141-mRNA-1	maker-scf300000870749.0-snap-gene-13.101-mRNA-1	maker-scf300000870735.0-snap-gene-12.63-mRNA-1	maker-scf300000870753.0-snap-gene-5.111-mRNA-1	maker-scf300000870601.1-snap-gene-0.71-mRNA-1	maker-scf300000870613.1-snap-gene-0.118-mRNA-1	maker-scf300000870601.0-snap-gene-12.60-mRNA-1	maker-scf300000870673.2-snap-gene-7.63-mRNA-1	maker-scf300000870601.0-snap-gene-5.96-mRNA-1	maker-scf300000870641.0-snap-gene-2.121-mRNA-1	maker-scf300000870603.0-augustus-gene-2.112-mRNA-1	maker-scf300000870603.0-snap-gene-8.18-mRNA-1	maker-scf300000870673.2-snap-gene-10.129-mRNA-1		maker-scf300000870601.0-snap-gene-4.31-mRNA-1	maker-scf300000870673.2-snap-gene-5.71-mRNA-1	maker-scf300000870662.0-snap-gene-11.14-mRNA-1	maker-scf300000870753.0-augustus-gene-25.89-mRNA-1	maker-scf300000870601.0-snap-gene-17.76-mRNA-1	maker-scf300000870693.1-snap-gene-4.48-mRNA-1	maker-scf300000870603.1-snap-gene-0.85-mRNA-1	maker-scf300000870607.0-snap-gene-1.12-mRNA-1	maker-scf300000870631.0-snap-gene-2.19-mRNA-1	maker-scf300000870629.0-snap-gene-0.54-mRNA-1
	maker-scf300000870750.0-snap-gene-1.5-mRNA-1	maker-scf300000870749.0-snap-gene-13.104-mRNA-1	maker-scf300000870735.0-snap-gene-14.23-mRNA-1	maker-scf300000870753.0-snap-gene-8.113-mRNA-1	maker-scf300000870601.1-snap-gene-2.46-mRNA-1	maker-scf300000870613.1-snap-gene-0.121-mRNA-1	maker-scf300000870601.0-snap-gene-12.73-mRNA-1	maker-scf300000870673.2-snap-gene-8.92-mRNA-1	maker-scf300000870601.0-snap-gene-6.51-mRNA-1	maker-scf300000870641.0-snap-gene-2.122-mRNA-1	maker-scf300000870603.0-snap-gene-10.6-mRNA-1	maker-scf300000870603.0-snap-gene-8.3-mRNA-1	maker-scf300000870673.2-snap-gene-10.150-mRNA-1		maker-scf300000870601.0-snap-gene-6.51-mRNA-1	maker-scf300000870673.2-snap-gene-6.104-mRNA-1	maker-scf300000870662.0-snap-gene-11.4-mRNA-1	maker-scf300000870753.0-snap-gene-1.82-mRNA-1	maker-scf300000870601.0-snap-gene-18.63-mRNA-1	maker-scf300000870693.1-snap-gene-4.53-mRNA-1	maker-scf300000870605.0-snap-gene-0.118-mRNA-1	maker-scf300000870607.0-snap-gene-1.13-mRNA-1	maker-scf300000870631.0-snap-gene-2.21-mRNA-1	maker-scf300000870629.0-snap-gene-1.65-mRNA-1
	maker-scf300000870750.0-snap-gene-3.125-mRNA-1	maker-scf300000870749.0-snap-gene-13.88-mRNA-1	maker-scf300000870735.0-snap-gene-14.6-mRNA-1	maker-scf300000870753.0-snap-gene-9.53-mRNA-1	maker-scf300000870601.1-snap-gene-3.53-mRNA-1	maker-scf300000870613.1-snap-gene-0.151-mRNA-1	maker-scf300000870601.0-snap-gene-12.79-mRNA-1	maker-scf300000870673.2-snap-gene-9.123-mRNA-1	maker-scf300000870601.0-snap-gene-6.53-mRNA-1	maker-scf300000870641.1-snap-gene-0.12-mRNA-1	maker-scf300000870603.0-snap-gene-12.116-mRNA-1	maker-scf300000870603.1-snap-gene-0.74-mRNA-1	maker-scf300000870673.2-snap-gene-13.60-mRNA-1		maker-scf300000870601.0-snap-gene-7.125-mRNA-1	maker-scf300000870673.2-snap-gene-8.102-mRNA-1	maker-scf300000870662.0-snap-gene-2.155-mRNA-1	maker-scf300000870753.0-snap-gene-11.120-mRNA-1	maker-scf300000870601.0-snap-gene-18.65-mRNA-1	maker-scf300000870693.1-snap-gene-4.76-mRNA-1	maker-scf300000870605.0-snap-gene-0.123-mRNA-1	maker-scf300000870607.0-snap-gene-1.14-mRNA-1	maker-scf300000870631.0-snap-gene-2.22-mRNA-1	maker-scf300000870629.0-snap-gene-4.108-mRNA-1
	maker-scf300000870750.0-snap-gene-4.124-mRNA-1	maker-scf300000870749.0-snap-gene-16.64-mRNA-1	maker-scf300000870735.0-snap-gene-14.61-mRNA-1	maker-scf300000870754.0-augustus-gene-6.54-mRNA-1	maker-scf300000870601.1-snap-gene-3.57-mRNA-1	maker-scf300000870613.1-snap-gene-0.154-mRNA-1	maker-scf300000870601.0-snap-gene-12.83-mRNA-1	maker-scf300000870693.1-snap-gene-0.50-mRNA-1	maker-scf300000870601.0-snap-gene-6.56-mRNA-1	maker-scf300000870641.1-snap-gene-0.13-mRNA-1	maker-scf300000870603.0-snap-gene-12.134-mRNA-1	maker-scf300000870605.0-augustus-gene-0.270-mRNA-1	maker-scf300000870673.2-snap-gene-14.90-mRNA-1		maker-scf300000870601.0-snap-gene-7.130-mRNA-1	maker-scf300000870673.2-snap-gene-8.79-mRNA-1	maker-scf300000870662.0-snap-gene-3.66-mRNA-1	maker-scf300000870753.0-snap-gene-11.125-mRNA-1	maker-scf300000870601.0-snap-gene-18.67-mRNA-1	maker-scf300000870693.1-snap-gene-4.80-mRNA-1	maker-scf300000870605.0-snap-gene-0.127-mRNA-1	maker-scf300000870611.0-snap-gene-0.133-mRNA-1	maker-scf300000870631.0-snap-gene-2.7-mRNA-1	maker-scf300000870629.0-snap-gene-4.117-mRNA-1
	maker-scf300000870750.0-snap-gene-4.167-mRNA-1	maker-scf300000870749.0-snap-gene-18.115-mRNA-1	maker-scf300000870735.0-snap-gene-2.71-mRNA-1	maker-scf300000870754.0-snap-gene-1.70-mRNA-1	maker-scf300000870601.1-snap-gene-4.121-mRNA-1	maker-scf300000870613.1-snap-gene-0.156-mRNA-1	maker-scf300000870601.0-snap-gene-12.85-mRNA-1	maker-scf300000870693.1-snap-gene-0.54-mRNA-1	maker-scf300000870601.0-snap-gene-6.68-mRNA-1	maker-scf300000870641.1-snap-gene-0.29-mRNA-1	maker-scf300000870603.0-snap-gene-12.152-mRNA-1	maker-scf300000870605.0-snap-gene-0.113-mRNA-1	maker-scf300000870673.2-snap-gene-15.122-mRNA-1		maker-scf300000870601.0-snap-gene-8.118-mRNA-1	maker-scf300000870673.2-snap-gene-8.85-mRNA-1	maker-scf300000870662.0-snap-gene-6.2-mRNA-1	maker-scf300000870753.0-snap-gene-11.127-mRNA-1	maker-scf300000870601.0-snap-gene-18.71-mRNA-1	maker-scf300000870693.1-snap-gene-4.85-mRNA-1	maker-scf300000870607.0-snap-gene-0.1-mRNA-1	maker-scf300000870611.0-snap-gene-0.142-mRNA-1	maker-scf300000870631.0-snap-gene-2.8-mRNA-1	maker-scf300000870631.0-snap-gene-0.106-mRNA-1
	maker-scf300000870751.0-snap-gene-0.46-mRNA-1	maker-scf300000870749.0-snap-gene-18.116-mRNA-1	maker-scf300000870735.0-snap-gene-2.73-mRNA-1	maker-scf300000870754.0-snap-gene-1.82-mRNA-1	maker-scf300000870601.1-snap-gene-4.122-mRNA-1	maker-scf300000870617.0-snap-gene-0.10-mRNA-1	maker-scf300000870601.0-snap-gene-14.78-mRNA-1	maker-scf300000870693.1-snap-gene-1.117-mRNA-1	maker-scf300000870601.0-snap-gene-7.115-mRNA-1	maker-scf300000870641.1-snap-gene-0.30-mRNA-1	maker-scf300000870603.0-snap-gene-12.153-mRNA-1	maker-scf300000870605.0-snap-gene-0.122-mRNA-1	maker-scf300000870673.2-snap-gene-2.11-mRNA-1		maker-scf300000870601.0-snap-gene-9.57-mRNA-1	maker-scf300000870673.2-snap-gene-9.119-mRNA-1	maker-scf300000870662.0-snap-gene-7.79-mRNA-1	maker-scf300000870753.0-snap-gene-12.57-mRNA-1	maker-scf300000870601.0-snap-gene-19.43-mRNA-1	maker-scf300000870693.1-snap-gene-4.88-mRNA-1	maker-scf300000870607.0-snap-gene-1.1-mRNA-1	maker-scf300000870613.1-snap-gene-0.118-mRNA-1	maker-scf300000870631.0-snap-gene-3.76-mRNA-1	maker-scf300000870631.0-snap-gene-0.119-mRNA-1
	maker-scf300000870751.0-snap-gene-1.103-mRNA-1	maker-scf300000870749.0-snap-gene-18.142-mRNA-1	maker-scf300000870735.0-snap-gene-2.79-mRNA-1	maker-scf300000870754.0-snap-gene-1.83-mRNA-1	maker-scf300000870601.1-snap-gene-4.124-mRNA-1	maker-scf300000870619.0-snap-gene-0.1-mRNA-1	maker-scf300000870601.0-snap-gene-15.101-mRNA-1	maker-scf300000870693.1-snap-gene-1.118-mRNA-1	maker-scf300000870601.0-snap-gene-7.117-mRNA-1	maker-scf300000870642.2-snap-gene-0.54-mRNA-1	maker-scf300000870603.0-snap-gene-13.59-mRNA-1	maker-scf300000870605.0-snap-gene-0.139-mRNA-1	maker-scf300000870673.2-snap-gene-2.2-mRNA-1		maker-scf300000870601.1-snap-gene-1.44-mRNA-1	maker-scf300000870673.2-snap-gene-9.120-mRNA-1	maker-scf300000870662.0-snap-gene-8.3-mRNA-1	maker-scf300000870753.0-snap-gene-12.62-mRNA-1	maker-scf300000870601.0-snap-gene-19.45-mRNA-1	maker-scf300000870712.0-snap-gene-0.0-mRNA-1	maker-scf300000870607.0-snap-gene-1.12-mRNA-1	maker-scf300000870613.1-snap-gene-0.129-mRNA-1	maker-scf300000870631.0-snap-gene-3.94-mRNA-1	maker-scf300000870631.0-snap-gene-0.128-mRNA-1
	maker-scf300000870752.0-snap-gene-2.5-mRNA-1	maker-scf300000870749.0-snap-gene-18.155-mRNA-1	maker-scf300000870735.0-snap-gene-3.56-mRNA-1	maker-scf300000870754.0-snap-gene-10.1-mRNA-1	maker-scf300000870601.1-snap-gene-4.128-mRNA-1	maker-scf300000870619.2-snap-gene-0.47-mRNA-1	maker-scf300000870601.0-snap-gene-16.109-mRNA-1	maker-scf300000870693.1-snap-gene-3.56-mRNA-1	maker-scf300000870601.0-snap-gene-7.118-mRNA-1	maker-scf300000870651.1-augustus-gene-2.52-mRNA-1	maker-scf300000870603.0-snap-gene-13.75-mRNA-1	maker-scf300000870607.0-snap-gene-0.0-mRNA-1	maker-scf300000870673.2-snap-gene-2.6-mRNA-1		maker-scf300000870601.1-snap-gene-2.51-mRNA-1	maker-scf300000870673.2-snap-gene-9.134-mRNA-1	maker-scf300000870662.0-snap-gene-8.8-mRNA-1	maker-scf300000870753.0-snap-gene-13.117-mRNA-1	maker-scf300000870601.0-snap-gene-19.9-mRNA-1	maker-scf300000870733.0-snap-gene-0.235-mRNA-1	maker-scf300000870607.0-snap-gene-1.14-mRNA-1	maker-scf300000870613.1-snap-gene-0.134-mRNA-1	maker-scf300000870631.0-snap-gene-3.99-mRNA-1	maker-scf300000870631.0-snap-gene-1.61-mRNA-1
	maker-scf300000870752.0-snap-gene-3.7-mRNA-1	maker-scf300000870749.0-snap-gene-18.157-mRNA-1	maker-scf300000870735.0-snap-gene-3.61-mRNA-1	maker-scf300000870754.0-snap-gene-10.20-mRNA-1	maker-scf300000870601.1-snap-gene-4.129-mRNA-1	maker-scf300000870619.2-snap-gene-0.49-mRNA-1	maker-scf300000870601.0-snap-gene-17.75-mRNA-1	maker-scf300000870693.1-snap-gene-3.63-mRNA-1	maker-scf300000870601.0-snap-gene-7.119-mRNA-1	maker-scf300000870651.1-snap-gene-0.65-mRNA-1	maker-scf300000870603.0-snap-gene-14.117-mRNA-1	maker-scf300000870607.0-snap-gene-1.10-mRNA-1	maker-scf300000870673.2-snap-gene-3.124-mRNA-1		maker-scf300000870601.1-snap-gene-4.129-mRNA-1	maker-scf300000870681.0-snap-gene-0.56-mRNA-1	maker-scf300000870673.1-snap-gene-1.181-mRNA-1	maker-scf300000870753.0-snap-gene-15.149-mRNA-1	maker-scf300000870601.0-snap-gene-2.106-mRNA-1	maker-scf300000870735.0-augustus-gene-12.139-mRNA-1	maker-scf300000870607.0-snap-gene-1.21-mRNA-1	maker-scf300000870613.1-snap-gene-0.140-mRNA-1	maker-scf300000870631.0-snap-gene-4.53-mRNA-1	maker-scf300000870631.0-snap-gene-2.19-mRNA-1
	maker-scf300000870752.0-snap-gene-6.108-mRNA-1	maker-scf300000870749.0-snap-gene-18.159-mRNA-1	maker-scf300000870735.0-snap-gene-4.96-mRNA-1	maker-scf300000870754.0-snap-gene-11.23-mRNA-1	maker-scf300000870601.1-snap-gene-4.135-mRNA-1	maker-scf300000870619.2-snap-gene-0.56-mRNA-1	maker-scf300000870601.0-snap-gene-18.54-mRNA-1	maker-scf300000870730.0-snap-gene-0.35-mRNA-1	maker-scf300000870601.0-snap-gene-7.126-mRNA-1	maker-scf300000870651.1-snap-gene-1.10-mRNA-1	maker-scf300000870603.0-snap-gene-14.130-mRNA-1	maker-scf300000870611.0-snap-gene-0.128-mRNA-1	maker-scf300000870673.2-snap-gene-6.106-mRNA-1		maker-scf300000870601.1-snap-gene-6.106-mRNA-1	maker-scf300000870681.0-snap-gene-0.60-mRNA-1	maker-scf300000870673.1-snap-gene-1.202-mRNA-1	maker-scf300000870753.0-snap-gene-17.17-mRNA-1	maker-scf300000870601.0-snap-gene-2.110-mRNA-1	maker-scf300000870735.0-snap-gene-1.9-mRNA-1	maker-scf300000870607.0-snap-gene-1.28-mRNA-1	maker-scf300000870613.1-snap-gene-0.162-mRNA-1	maker-scf300000870631.0-snap-gene-4.64-mRNA-1	maker-scf300000870631.0-snap-gene-2.2-mRNA-1
	maker-scf300000870752.1-snap-gene-0.50-mRNA-1	maker-scf300000870749.0-snap-gene-2.26-mRNA-1	maker-scf300000870735.0-snap-gene-8.111-mRNA-1	maker-scf300000870754.0-snap-gene-11.9-mRNA-1	maker-scf300000870601.1-snap-gene-4.150-mRNA-1	maker-scf300000870619.2-snap-gene-0.59-mRNA-1	maker-scf300000870601.0-snap-gene-18.61-mRNA-1	maker-scf300000870733.0-snap-gene-0.231-mRNA-1	maker-scf300000870601.0-snap-gene-8.120-mRNA-1	maker-scf300000870651.1-snap-gene-3.67-mRNA-1	maker-scf300000870603.0-snap-gene-14.131-mRNA-1	maker-scf300000870611.0-snap-gene-0.147-mRNA-1	maker-scf300000870673.2-snap-gene-7.55-mRNA-1		maker-scf300000870601.1-snap-gene-6.113-mRNA-1	maker-scf300000870681.0-snap-gene-0.62-mRNA-1	maker-scf300000870673.1-snap-gene-1.205-mRNA-1	maker-scf300000870753.0-snap-gene-17.19-mRNA-1	maker-scf300000870601.0-snap-gene-3.66-mRNA-1	maker-scf300000870735.0-snap-gene-10.91-mRNA-1	maker-scf300000870611.0-snap-gene-0.131-mRNA-1	maker-scf300000870619.2-augustus-gene-3.67-mRNA-1	maker-scf300000870631.0-snap-gene-5.108-mRNA-1	maker-scf300000870631.0-snap-gene-2.22-mRNA-1
	maker-scf300000870752.1-snap-gene-0.63-mRNA-1	maker-scf300000870749.0-snap-gene-3.10-mRNA-1	maker-scf300000870735.0-snap-gene-9.53-mRNA-1	maker-scf300000870754.0-snap-gene-12.213-mRNA-1	maker-scf300000870601.1-snap-gene-5.12-mRNA-1	maker-scf300000870619.2-snap-gene-0.63-mRNA-1	maker-scf300000870601.0-snap-gene-19.37-mRNA-1	maker-scf300000870735.0-augustus-gene-6.135-mRNA-1	maker-scf300000870601.0-snap-gene-8.124-mRNA-1	maker-scf300000870651.1-snap-gene-4.59-mRNA-1	maker-scf300000870603.0-snap-gene-15.144-mRNA-1	maker-scf300000870613.1-snap-gene-0.115-mRNA-1	maker-scf300000870673.2-snap-gene-7.60-mRNA-1		maker-scf300000870601.1-snap-gene-6.137-mRNA-1	maker-scf300000870693.1-snap-gene-0.60-mRNA-1	maker-scf300000870673.2-snap-gene-0.1-mRNA-1	maker-scf300000870753.0-snap-gene-17.27-mRNA-1	maker-scf300000870601.0-snap-gene-3.74-mRNA-1	maker-scf300000870735.0-snap-gene-11.67-mRNA-1	maker-scf300000870613.1-snap-gene-0.124-mRNA-1	maker-scf300000870619.2-augustus-gene-3.92-mRNA-1	maker-scf300000870631.0-snap-gene-5.114-mRNA-1	maker-scf300000870631.0-snap-gene-3.88-mRNA-1
	maker-scf300000870752.1-snap-gene-1.117-mRNA-1	maker-scf300000870749.0-snap-gene-4.17-mRNA-1	maker-scf300000870735.0-snap-gene-9.72-mRNA-1	maker-scf300000870754.0-snap-gene-12.226-mRNA-1	maker-scf300000870601.1-snap-gene-6.113-mRNA-1	maker-scf300000870619.2-snap-gene-0.64-mRNA-1	maker-scf300000870601.0-snap-gene-19.38-mRNA-1	maker-scf300000870735.0-snap-gene-1.18-mRNA-1	maker-scf300000870601.1-augustus-gene-6.2-mRNA-1	maker-scf300000870651.1-snap-gene-5.138-mRNA-1	maker-scf300000870603.0-snap-gene-16.60-mRNA-1	maker-scf300000870613.1-snap-gene-0.126-mRNA-1	maker-scf300000870673.2-snap-gene-8.87-mRNA-1		maker-scf300000870603.0-augustus-gene-15.7-mRNA-1	maker-scf300000870693.1-snap-gene-3.30-mRNA-1	maker-scf300000870673.2-snap-gene-0.9-mRNA-1	maker-scf300000870753.0-snap-gene-18.16-mRNA-1	maker-scf300000870601.0-snap-gene-4.26-mRNA-1	maker-scf300000870735.0-snap-gene-12.82-mRNA-1	maker-scf300000870613.1-snap-gene-0.134-mRNA-1	maker-scf300000870619.2-snap-gene-0.47-mRNA-1	maker-scf300000870635.0-snap-gene-0.162-mRNA-1	maker-scf300000870631.0-snap-gene-3.99-mRNA-1
	maker-scf300000870752.1-snap-gene-1.140-mRNA-1	maker-scf300000870749.0-snap-gene-5.66-mRNA-1	maker-scf300000870743.0-snap-gene-0.52-mRNA-1	maker-scf300000870754.0-snap-gene-2.0-mRNA-1	maker-scf300000870601.1-snap-gene-6.145-mRNA-1	maker-scf300000870619.2-snap-gene-3.138-mRNA-1	maker-scf300000870601.0-snap-gene-19.49-mRNA-1	maker-scf300000870735.0-snap-gene-1.24-mRNA-1	maker-scf300000870601.1-snap-gene-0.59-mRNA-1	maker-scf300000870651.1-snap-gene-6.108-mRNA-1	maker-scf300000870603.0-snap-gene-16.61-mRNA-1	maker-scf300000870613.1-snap-gene-0.127-mRNA-1	maker-scf300000870673.2-snap-gene-8.96-mRNA-1		maker-scf300000870603.0-augustus-gene-2.112-mRNA-1	maker-scf300000870693.1-snap-gene-3.72-mRNA-1	maker-scf300000870673.2-snap-gene-12.82-mRNA-1	maker-scf300000870753.0-snap-gene-19.10-mRNA-1	maker-scf300000870601.0-snap-gene-4.28-mRNA-1	maker-scf300000870735.0-snap-gene-13.16-mRNA-1	maker-scf300000870613.1-snap-gene-0.147-mRNA-1	maker-scf300000870619.2-snap-gene-1.66-mRNA-1	maker-scf300000870635.0-snap-gene-0.164-mRNA-1	maker-scf300000870631.0-snap-gene-4.57-mRNA-1
	maker-scf300000870753.0-augustus-gene-8.7-mRNA-1	maker-scf300000870749.0-snap-gene-5.80-mRNA-1	maker-scf300000870743.0-snap-gene-0.60-mRNA-1	maker-scf300000870754.0-snap-gene-2.3-mRNA-1	maker-scf300000870603.0-augustus-gene-0.82-mRNA-1	maker-scf300000870629.0-augustus-gene-1.60-mRNA-1	maker-scf300000870601.0-snap-gene-2.112-mRNA-1	maker-scf300000870735.0-snap-gene-1.26-mRNA-1	maker-scf300000870601.1-snap-gene-1.55-mRNA-1	maker-scf300000870651.1-snap-gene-6.124-mRNA-1	maker-scf300000870603.0-snap-gene-16.70-mRNA-1	maker-scf300000870613.1-snap-gene-0.136-mRNA-1	maker-scf300000870673.2-snap-gene-9.120-mRNA-1		maker-scf300000870603.0-augustus-gene-9.75-mRNA-1	maker-scf300000870693.1-snap-gene-3.76-mRNA-1	maker-scf300000870673.2-snap-gene-13.60-mRNA-1	maker-scf300000870753.0-snap-gene-21.107-mRNA-1	maker-scf300000870601.0-snap-gene-6.51-mRNA-1	maker-scf300000870735.0-snap-gene-14.13-mRNA-1	maker-scf300000870613.1-snap-gene-0.148-mRNA-1	maker-scf300000870619.2-snap-gene-1.67-mRNA-1	maker-scf300000870641.0-snap-gene-0.49-mRNA-1	maker-scf300000870631.0-snap-gene-5.108-mRNA-1
	maker-scf300000870753.0-snap-gene-1.86-mRNA-1	maker-scf300000870749.0-snap-gene-5.85-mRNA-1	maker-scf300000870743.0-snap-gene-2.14-mRNA-1	maker-scf300000870754.0-snap-gene-3.4-mRNA-1	maker-scf300000870603.0-augustus-gene-4.35-mRNA-1	maker-scf300000870629.0-snap-gene-1.70-mRNA-1	maker-scf300000870601.0-snap-gene-2.121-mRNA-1	maker-scf300000870735.0-snap-gene-1.3-mRNA-1	maker-scf300000870601.1-snap-gene-3.63-mRNA-1	maker-scf300000870662.0-snap-gene-0.17-mRNA-1	maker-scf300000870603.0-snap-gene-16.72-mRNA-1	maker-scf300000870613.1-snap-gene-0.152-mRNA-1	maker-scf300000870673.2-snap-gene-9.127-mRNA-1		maker-scf300000870603.0-snap-gene-0.12-mRNA-1	maker-scf300000870693.1-snap-gene-3.82-mRNA-1	maker-scf300000870673.2-snap-gene-13.63-mRNA-1	maker-scf300000870753.0-snap-gene-22.126-mRNA-1	maker-scf300000870601.0-snap-gene-6.53-mRNA-1	maker-scf300000870735.0-snap-gene-2.81-mRNA-1	maker-scf300000870613.1-snap-gene-0.162-mRNA-1	maker-scf300000870619.2-snap-gene-1.68-mRNA-1	maker-scf300000870641.0-snap-gene-1.12-mRNA-1	maker-scf300000870631.0-snap-gene-5.117-mRNA-1
	maker-scf300000870753.0-snap-gene-1.89-mRNA-1	maker-scf300000870749.0-snap-gene-6.13-mRNA-1	maker-scf300000870743.0-snap-gene-2.21-mRNA-1	maker-scf300000870754.0-snap-gene-4.42-mRNA-1	maker-scf300000870603.0-snap-gene-0.0-mRNA-1	maker-scf300000870629.0-snap-gene-1.86-mRNA-1	maker-scf300000870601.0-snap-gene-2.123-mRNA-1	maker-scf300000870735.0-snap-gene-10.71-mRNA-1	maker-scf300000870601.1-snap-gene-3.67-mRNA-1	maker-scf300000870662.0-snap-gene-0.6-mRNA-1	maker-scf300000870603.0-snap-gene-16.78-mRNA-1	maker-scf300000870613.1-snap-gene-0.156-mRNA-1	maker-scf300000870673.2-snap-gene-9.128-mRNA-1		maker-scf300000870603.0-snap-gene-10.17-mRNA-1	maker-scf300000870693.1-snap-gene-4.35-mRNA-1	maker-scf300000870673.2-snap-gene-14.65-mRNA-1	maker-scf300000870753.0-snap-gene-22.129-mRNA-1	maker-scf300000870601.0-snap-gene-6.56-mRNA-1	maker-scf300000870735.0-snap-gene-3.68-mRNA-1	maker-scf300000870619.2-augustus-gene-2.88-mRNA-1	maker-scf300000870619.2-snap-gene-2.14-mRNA-1	maker-scf300000870641.0-snap-gene-1.7-mRNA-1	maker-scf300000870631.0-snap-gene-5.119-mRNA-1
	maker-scf300000870753.0-snap-gene-1.93-mRNA-1	maker-scf300000870749.0-snap-gene-7.6-mRNA-1	maker-scf300000870743.0-snap-gene-2.39-mRNA-1	maker-scf300000870754.0-snap-gene-6.65-mRNA-1	maker-scf300000870603.0-snap-gene-0.1-mRNA-1	maker-scf300000870629.0-snap-gene-3.45-mRNA-1	maker-scf300000870601.0-snap-gene-4.8-mRNA-1	maker-scf300000870735.0-snap-gene-10.78-mRNA-1	maker-scf300000870601.1-snap-gene-3.70-mRNA-1	maker-scf300000870662.0-snap-gene-1.5-mRNA-1	maker-scf300000870603.0-snap-gene-17.18-mRNA-1	maker-scf300000870615.0-snap-gene-0.3-mRNA-1	maker-scf300000870681.0-snap-gene-0.57-mRNA-1		maker-scf300000870603.0-snap-gene-10.24-mRNA-1	maker-scf300000870693.1-snap-gene-4.47-mRNA-1	maker-scf300000870673.2-snap-gene-15.101-mRNA-1	maker-scf300000870753.0-snap-gene-25.58-mRNA-1	maker-scf300000870601.0-snap-gene-7.118-mRNA-1	maker-scf300000870735.0-snap-gene-4.86-mRNA-1	maker-scf300000870619.2-augustus-gene-3.92-mRNA-1	maker-scf300000870619.2-snap-gene-2.8-mRNA-1	maker-scf300000870641.1-snap-gene-0.11-mRNA-1	maker-scf300000870635.0-snap-gene-0.164-mRNA-1
	maker-scf300000870753.0-snap-gene-1.95-mRNA-1	maker-scf300000870749.0-snap-gene-9.73-mRNA-1	maker-scf300000870743.0-snap-gene-5.10-mRNA-1	maker-scf300000870754.0-snap-gene-9.11-mRNA-1	maker-scf300000870603.0-snap-gene-1.105-mRNA-1	maker-scf300000870629.0-snap-gene-3.49-mRNA-1	maker-scf300000870601.0-snap-gene-5.92-mRNA-1	maker-scf300000870735.0-snap-gene-11.57-mRNA-1	maker-scf300000870601.1-snap-gene-4.125-mRNA-1	maker-scf300000870662.0-snap-gene-10.15-mRNA-1	maker-scf300000870603.0-snap-gene-17.20-mRNA-1	maker-scf300000870619.2-augustus-gene-3.84-mRNA-1	maker-scf300000870693.1-snap-gene-2.82-mRNA-1		maker-scf300000870603.0-snap-gene-10.25-mRNA-1	maker-scf300000870693.1-snap-gene-4.88-mRNA-1	maker-scf300000870673.2-snap-gene-15.109-mRNA-1	maker-scf300000870753.0-snap-gene-25.67-mRNA-1	maker-scf300000870601.0-snap-gene-7.125-mRNA-1	maker-scf300000870735.0-snap-gene-5.2-mRNA-1	maker-scf300000870619.2-snap-gene-0.48-mRNA-1	maker-scf300000870619.2-snap-gene-3.110-mRNA-1	maker-scf300000870641.1-snap-gene-0.17-mRNA-1	maker-scf300000870641.0-snap-gene-0.49-mRNA-1
	maker-scf300000870753.0-snap-gene-12.54-mRNA-1	maker-scf300000870749.1-snap-gene-0.112-mRNA-1	maker-scf300000870743.0-snap-gene-5.7-mRNA-1	maker-scf300000870754.0-snap-gene-9.14-mRNA-1	maker-scf300000870603.0-snap-gene-11.72-mRNA-1	maker-scf300000870629.0-snap-gene-4.109-mRNA-1	maker-scf300000870601.0-snap-gene-6.67-mRNA-1	maker-scf300000870735.0-snap-gene-11.70-mRNA-1	maker-scf300000870601.1-snap-gene-4.150-mRNA-1	maker-scf300000870662.0-snap-gene-10.21-mRNA-1	maker-scf300000870603.0-snap-gene-18.108-mRNA-1	maker-scf300000870619.2-snap-gene-0.46-mRNA-1	maker-scf300000870693.1-snap-gene-2.91-mRNA-1		maker-scf300000870603.0-snap-gene-10.3-mRNA-1	maker-scf300000870707.0-snap-gene-0.5-mRNA-1	maker-scf300000870673.2-snap-gene-15.112-mRNA-1	maker-scf300000870753.0-snap-gene-4.53-mRNA-1	maker-scf300000870601.0-snap-gene-7.126-mRNA-1	maker-scf300000870735.0-snap-gene-6.1-mRNA-1	maker-scf300000870619.2-snap-gene-0.54-mRNA-1	maker-scf300000870619.2-snap-gene-3.111-mRNA-1	maker-scf300000870641.1-snap-gene-0.24-mRNA-1	maker-scf300000870641.0-snap-gene-0.50-mRNA-1
	maker-scf300000870753.0-snap-gene-12.66-mRNA-1	maker-scf300000870750.0-snap-gene-0.108-mRNA-1	maker-scf300000870743.0-snap-gene-6.18-mRNA-1	maker-scf300000870756.2-snap-gene-0.30-mRNA-1	maker-scf300000870603.0-snap-gene-11.79-mRNA-1	maker-scf300000870629.0-snap-gene-4.120-mRNA-1	maker-scf300000870601.0-snap-gene-8.113-mRNA-1	maker-scf300000870735.0-snap-gene-12.61-mRNA-1	maker-scf300000870601.1-snap-gene-5.14-mRNA-1	maker-scf300000870662.0-snap-gene-11.16-mRNA-1	maker-scf300000870603.0-snap-gene-2.10-mRNA-1	maker-scf300000870619.2-snap-gene-0.48-mRNA-1	maker-scf300000870693.1-snap-gene-3.30-mRNA-1		maker-scf300000870603.0-snap-gene-11.72-mRNA-1	maker-scf300000870733.0-snap-gene-0.200-mRNA-1	maker-scf300000870673.2-snap-gene-15.122-mRNA-1	maker-scf300000870753.0-snap-gene-9.37-mRNA-1	maker-scf300000870601.0-snap-gene-7.130-mRNA-1	maker-scf300000870735.0-snap-gene-7.59-mRNA-1	maker-scf300000870619.2-snap-gene-1.66-mRNA-1	maker-scf300000870619.2-snap-gene-3.144-mRNA-1	maker-scf300000870645.0-snap-gene-0.0-mRNA-1	maker-scf300000870641.0-snap-gene-1.11-mRNA-1
	maker-scf300000870753.0-snap-gene-14.25-mRNA-1	maker-scf300000870750.0-snap-gene-1.5-mRNA-1	maker-scf300000870743.0-snap-gene-6.32-mRNA-1	snap_masked-scf300000870586.0-processed-gene-0.39-mRNA-1	maker-scf300000870603.0-snap-gene-12.116-mRNA-1	maker-scf300000870629.0-snap-gene-5.10-mRNA-1	maker-scf300000870601.0-snap-gene-8.114-mRNA-1	maker-scf300000870735.0-snap-gene-12.66-mRNA-1	maker-scf300000870601.1-snap-gene-6.103-mRNA-1	maker-scf300000870662.0-snap-gene-12.86-mRNA-1	maker-scf300000870603.0-snap-gene-2.3-mRNA-1	maker-scf300000870619.2-snap-gene-0.63-mRNA-1	maker-scf300000870693.1-snap-gene-3.54-mRNA-1		maker-scf300000870603.0-snap-gene-12.115-mRNA-1	maker-scf300000870733.0-snap-gene-0.233-mRNA-1	maker-scf300000870673.2-snap-gene-2.2-mRNA-1	maker-scf300000870753.0-snap-gene-9.38-mRNA-1	maker-scf300000870601.0-snap-gene-8.124-mRNA-1	maker-scf300000870735.0-snap-gene-8.119-mRNA-1	maker-scf300000870619.2-snap-gene-1.67-mRNA-1	maker-scf300000870619.2-snap-gene-4.103-mRNA-1	maker-scf300000870645.0-snap-gene-0.5-mRNA-1	maker-scf300000870641.0-snap-gene-1.2-mRNA-1
	maker-scf300000870753.0-snap-gene-14.26-mRNA-1	maker-scf300000870750.0-snap-gene-3.107-mRNA-1	maker-scf300000870743.0-snap-gene-6.37-mRNA-1	snap_masked-scf300000870586.0-processed-gene-0.40-mRNA-1	maker-scf300000870603.0-snap-gene-12.136-mRNA-1	maker-scf300000870629.0-snap-gene-6.65-mRNA-1	maker-scf300000870601.0-snap-gene-8.115-mRNA-1	maker-scf300000870735.0-snap-gene-14.43-mRNA-1	maker-scf300000870601.1-snap-gene-6.122-mRNA-1	maker-scf300000870662.0-snap-gene-12.92-mRNA-1	maker-scf300000870603.0-snap-gene-3.67-mRNA-1	maker-scf300000870619.2-snap-gene-1.61-mRNA-1	maker-scf300000870693.1-snap-gene-3.63-mRNA-1		maker-scf300000870603.0-snap-gene-13.56-mRNA-1	maker-scf300000870735.0-augustus-gene-12.139-mRNA-1	maker-scf300000870673.2-snap-gene-2.4-mRNA-1	maker-scf300000870753.0-snap-gene-9.39-mRNA-1	maker-scf300000870601.0-snap-gene-9.69-mRNA-1	maker-scf300000870735.0-snap-gene-9.64-mRNA-1	maker-scf300000870619.2-snap-gene-2.14-mRNA-1	maker-scf300000870619.2-snap-gene-4.104-mRNA-1	maker-scf300000870651.1-snap-gene-0.60-mRNA-1	maker-scf300000870641.0-snap-gene-1.37-mRNA-1
	maker-scf300000870753.0-snap-gene-15.145-mRNA-1	maker-scf300000870750.0-snap-gene-3.112-mRNA-1	maker-scf300000870744.0-snap-gene-0.58-mRNA-1	snap_masked-scf300000870586.0-processed-gene-2.83-mRNA-1	maker-scf300000870603.0-snap-gene-12.152-mRNA-1	maker-scf300000870629.0-snap-gene-6.77-mRNA-1	maker-scf300000870601.0-snap-gene-8.126-mRNA-1	maker-scf300000870735.0-snap-gene-2.58-mRNA-1	maker-scf300000870601.1-snap-gene-6.126-mRNA-1	maker-scf300000870662.0-snap-gene-2.128-mRNA-1	maker-scf300000870603.0-snap-gene-3.70-mRNA-1	maker-scf300000870619.2-snap-gene-1.63-mRNA-1	maker-scf300000870693.1-snap-gene-3.70-mRNA-1		maker-scf300000870603.0-snap-gene-13.73-mRNA-1	maker-scf300000870735.0-snap-gene-1.6-mRNA-1	maker-scf300000870673.2-snap-gene-2.6-mRNA-1	maker-scf300000870753.0-snap-gene-9.43-mRNA-1	maker-scf300000870601.1-snap-gene-1.42-mRNA-1	maker-scf300000870743.0-augustus-gene-6.167-mRNA-1	maker-scf300000870619.2-snap-gene-2.21-mRNA-1	maker-scf300000870619.2-snap-gene-4.118-mRNA-1	maker-scf300000870651.1-snap-gene-0.61-mRNA-1	maker-scf300000870641.0-snap-gene-1.7-mRNA-1
	maker-scf300000870753.0-snap-gene-19.1-mRNA-1	maker-scf300000870750.0-snap-gene-4.117-mRNA-1	maker-scf300000870744.0-snap-gene-2.106-mRNA-1	snap_masked-scf300000870586.0-processed-gene-2.89-mRNA-1	maker-scf300000870603.0-snap-gene-13.53-mRNA-1	maker-scf300000870629.0-snap-gene-6.78-mRNA-1	maker-scf300000870601.0-snap-gene-8.137-mRNA-1	maker-scf300000870735.0-snap-gene-4.79-mRNA-1	maker-scf300000870601.1-snap-gene-6.138-mRNA-1	maker-scf300000870662.0-snap-gene-2.132-mRNA-1	maker-scf300000870603.0-snap-gene-3.74-mRNA-1	maker-scf300000870619.2-snap-gene-3.122-mRNA-1	maker-scf300000870693.1-snap-gene-4.80-mRNA-1		maker-scf300000870603.0-snap-gene-13.79-mRNA-1	maker-scf300000870735.0-snap-gene-10.91-mRNA-1	maker-scf300000870673.2-snap-gene-3.108-mRNA-1	maker-scf300000870753.0-snap-gene-9.44-mRNA-1	maker-scf300000870601.1-snap-gene-1.44-mRNA-1	maker-scf300000870743.0-snap-gene-2.15-mRNA-1	maker-scf300000870619.2-snap-gene-3.110-mRNA-1	maker-scf300000870619.2-snap-gene-4.119-mRNA-1	maker-scf300000870651.1-snap-gene-1.6-mRNA-1	maker-scf300000870641.1-snap-gene-0.11-mRNA-1
	maker-scf300000870753.0-snap-gene-2.0-mRNA-1	maker-scf300000870750.0-snap-gene-4.146-mRNA-1	maker-scf300000870744.1-snap-gene-1.61-mRNA-1	snap_masked-scf300000870586.0-processed-gene-4.22-mRNA-1	maker-scf300000870603.0-snap-gene-13.59-mRNA-1	maker-scf300000870631.0-augustus-gene-2.128-mRNA-1	maker-scf300000870601.0-snap-gene-9.61-mRNA-1	maker-scf300000870735.0-snap-gene-4.96-mRNA-1	maker-scf300000870601.1-snap-gene-6.144-mRNA-1	maker-scf300000870662.0-snap-gene-3.73-mRNA-1	maker-scf300000870603.0-snap-gene-3.85-mRNA-1	maker-scf300000870619.2-snap-gene-4.82-mRNA-1	maker-scf300000870693.1-snap-gene-4.98-mRNA-1		maker-scf300000870603.0-snap-gene-14.123-mRNA-1	maker-scf300000870735.0-snap-gene-11.53-mRNA-1	maker-scf300000870673.2-snap-gene-3.114-mRNA-1	maker-scf300000870753.0-snap-gene-9.45-mRNA-1	maker-scf300000870601.1-snap-gene-3.68-mRNA-1	maker-scf300000870743.0-snap-gene-2.17-mRNA-1	maker-scf300000870619.2-snap-gene-3.111-mRNA-1	maker-scf300000870619.2-snap-gene-4.84-mRNA-1	maker-scf300000870651.1-snap-gene-2.70-mRNA-1	maker-scf300000870641.1-snap-gene-0.17-mRNA-1
	maker-scf300000870753.0-snap-gene-20.11-mRNA-1	maker-scf300000870751.0-snap-gene-0.37-mRNA-1	maker-scf300000870744.1-snap-gene-1.83-mRNA-1	snap_masked-scf300000870586.0-processed-gene-4.54-mRNA-1	maker-scf300000870603.0-snap-gene-13.62-mRNA-1	maker-scf300000870631.0-snap-gene-0.120-mRNA-1	maker-scf300000870601.0-snap-gene-9.62-mRNA-1	maker-scf300000870735.0-snap-gene-4.99-mRNA-1	maker-scf300000870603.0-augustus-gene-2.101-mRNA-1	maker-scf300000870662.0-snap-gene-3.78-mRNA-1	maker-scf300000870603.0-snap-gene-3.87-mRNA-1	maker-scf300000870621.0-snap-gene-0.4-mRNA-1	maker-scf300000870719.0-snap-gene-0.2-mRNA-1		maker-scf300000870603.0-snap-gene-16.68-mRNA-1	maker-scf300000870735.0-snap-gene-11.56-mRNA-1	maker-scf300000870673.2-snap-gene-4.57-mRNA-1	maker-scf300000870753.0-snap-gene-9.51-mRNA-1	maker-scf300000870601.1-snap-gene-3.72-mRNA-1	maker-scf300000870743.0-snap-gene-2.18-mRNA-1	maker-scf300000870619.2-snap-gene-3.127-mRNA-1	maker-scf300000870619.2-snap-gene-4.97-mRNA-1	maker-scf300000870651.1-snap-gene-3.64-mRNA-1	maker-scf300000870641.1-snap-gene-0.24-mRNA-1
	maker-scf300000870753.0-snap-gene-20.14-mRNA-1	maker-scf300000870752.0-snap-gene-1.107-mRNA-1	maker-scf300000870744.1-snap-gene-3.2-mRNA-1	snap_masked-scf300000870593.0-processed-gene-0.59-mRNA-1	maker-scf300000870603.0-snap-gene-14.116-mRNA-1	maker-scf300000870631.0-snap-gene-0.121-mRNA-1	maker-scf300000870601.0-snap-gene-9.72-mRNA-1	maker-scf300000870735.0-snap-gene-6.23-mRNA-1	maker-scf300000870603.0-augustus-gene-8.83-mRNA-1	maker-scf300000870662.0-snap-gene-3.82-mRNA-1	maker-scf300000870603.0-snap-gene-4.107-mRNA-1	maker-scf300000870629.0-snap-gene-0.60-mRNA-1	maker-scf300000870733.0-snap-gene-0.241-mRNA-1		maker-scf300000870603.0-snap-gene-16.70-mRNA-1	maker-scf300000870735.0-snap-gene-12.72-mRNA-1	maker-scf300000870673.2-snap-gene-4.75-mRNA-1	maker-scf300000870754.0-augustus-gene-6.54-mRNA-1	maker-scf300000870601.1-snap-gene-4.123-mRNA-1	maker-scf300000870743.0-snap-gene-2.20-mRNA-1	maker-scf300000870619.2-snap-gene-4.103-mRNA-1	maker-scf300000870626.0-snap-gene-0.53-mRNA-1	maker-scf300000870651.1-snap-gene-5.129-mRNA-1	maker-scf300000870641.1-snap-gene-0.9-mRNA-1
	maker-scf300000870753.0-snap-gene-20.5-mRNA-1	maker-scf300000870752.0-snap-gene-1.110-mRNA-1	maker-scf300000870744.1-snap-gene-3.26-mRNA-1	snap_masked-scf300000870593.0-processed-gene-1.58-mRNA-1	maker-scf300000870603.0-snap-gene-14.123-mRNA-1	maker-scf300000870631.0-snap-gene-1.63-mRNA-1	maker-scf300000870601.1-snap-gene-0.71-mRNA-1	maker-scf300000870735.0-snap-gene-7.60-mRNA-1	maker-scf300000870603.0-snap-gene-0.1-mRNA-1	maker-scf300000870662.0-snap-gene-4.74-mRNA-1	maker-scf300000870603.0-snap-gene-4.116-mRNA-1	maker-scf300000870629.0-snap-gene-1.84-mRNA-1	maker-scf300000870735.0-augustus-gene-0.7-mRNA-1		maker-scf300000870603.0-snap-gene-18.100-mRNA-1	maker-scf300000870735.0-snap-gene-12.82-mRNA-1	maker-scf300000870673.2-snap-gene-4.80-mRNA-1	maker-scf300000870754.0-snap-gene-0.103-mRNA-1	maker-scf300000870601.1-snap-gene-4.144-mRNA-1	maker-scf300000870743.0-snap-gene-2.29-mRNA-1	maker-scf300000870619.2-snap-gene-4.104-mRNA-1	maker-scf300000870629.0-snap-gene-0.51-mRNA-1	maker-scf300000870651.1-snap-gene-6.112-mRNA-1	maker-scf300000870642.0-snap-gene-0.18-mRNA-1
	maker-scf300000870753.0-snap-gene-21.104-mRNA-1	maker-scf300000870752.0-snap-gene-4.89-mRNA-1	maker-scf300000870744.1-snap-gene-4.66-mRNA-1	snap_masked-scf300000870593.0-processed-gene-1.64-mRNA-1	maker-scf300000870603.0-snap-gene-14.135-mRNA-1	maker-scf300000870631.0-snap-gene-1.68-mRNA-1	maker-scf300000870601.1-snap-gene-1.48-mRNA-1	maker-scf300000870735.0-snap-gene-7.69-mRNA-1	maker-scf300000870603.0-snap-gene-1.120-mRNA-1	maker-scf300000870662.0-snap-gene-4.77-mRNA-1	maker-scf300000870603.0-snap-gene-5.21-mRNA-1	maker-scf300000870629.0-snap-gene-3.50-mRNA-1	maker-scf300000870735.0-snap-gene-0.96-mRNA-1		maker-scf300000870603.0-snap-gene-18.101-mRNA-1	maker-scf300000870735.0-snap-gene-13.13-mRNA-1	maker-scf300000870673.2-snap-gene-6.103-mRNA-1	maker-scf300000870754.0-snap-gene-10.13-mRNA-1	maker-scf300000870601.1-snap-gene-6.106-mRNA-1	maker-scf300000870743.0-snap-gene-2.33-mRNA-1	maker-scf300000870619.2-snap-gene-4.118-mRNA-1	maker-scf300000870629.0-snap-gene-0.55-mRNA-1	maker-scf300000870651.1-snap-gene-6.121-mRNA-1	maker-scf300000870642.2-snap-gene-0.48-mRNA-1
	maker-scf300000870753.0-snap-gene-21.118-mRNA-1	maker-scf300000870752.0-snap-gene-5.0-mRNA-1	maker-scf300000870744.1-snap-gene-5.12-mRNA-1	snap_masked-scf300000870593.0-processed-gene-1.86-mRNA-1	maker-scf300000870603.0-snap-gene-15.119-mRNA-1	maker-scf300000870631.0-snap-gene-3.81-mRNA-1	maker-scf300000870601.1-snap-gene-2.46-mRNA-1	maker-scf300000870735.0-snap-gene-9.61-mRNA-1	maker-scf300000870603.0-snap-gene-12.134-mRNA-1	maker-scf300000870662.0-snap-gene-5.113-mRNA-1	maker-scf300000870603.0-snap-gene-5.4-mRNA-1	maker-scf300000870629.0-snap-gene-6.64-mRNA-1	maker-scf300000870735.0-snap-gene-1.11-mRNA-1		maker-scf300000870603.0-snap-gene-18.113-mRNA-1	maker-scf300000870735.0-snap-gene-13.16-mRNA-1	maker-scf300000870673.2-snap-gene-7.55-mRNA-1	maker-scf300000870754.0-snap-gene-11.23-mRNA-1	maker-scf300000870601.1-snap-gene-6.137-mRNA-1	maker-scf300000870743.0-snap-gene-2.37-mRNA-1	maker-scf300000870619.2-snap-gene-4.84-mRNA-1	maker-scf300000870629.0-snap-gene-4.125-mRNA-1	maker-scf300000870662.0-snap-gene-1.4-mRNA-1	maker-scf300000870642.2-snap-gene-0.51-mRNA-1
	maker-scf300000870753.0-snap-gene-21.120-mRNA-1	maker-scf300000870752.1-snap-gene-1.139-mRNA-1	maker-scf300000870744.1-snap-gene-5.23-mRNA-1	snap_masked-scf300000870593.0-processed-gene-1.89-mRNA-1	maker-scf300000870603.0-snap-gene-17.17-mRNA-1	maker-scf300000870631.0-snap-gene-3.94-mRNA-1	maker-scf300000870601.1-snap-gene-2.52-mRNA-1	maker-scf300000870743.0-snap-gene-2.0-mRNA-1	maker-scf300000870603.0-snap-gene-12.140-mRNA-1	maker-scf300000870662.0-snap-gene-5.145-mRNA-1	maker-scf300000870603.0-snap-gene-6.49-mRNA-1	maker-scf300000870630.0-snap-gene-0.7-mRNA-1	maker-scf300000870735.0-snap-gene-1.23-mRNA-1		maker-scf300000870603.0-snap-gene-18.132-mRNA-1	maker-scf300000870735.0-snap-gene-13.20-mRNA-1	maker-scf300000870673.2-snap-gene-7.60-mRNA-1	maker-scf300000870754.0-snap-gene-12.226-mRNA-1	maker-scf300000870603.0-augustus-gene-10.111-mRNA-1	maker-scf300000870743.0-snap-gene-2.39-mRNA-1	maker-scf300000870620.0-snap-gene-0.8-mRNA-1	maker-scf300000870631.0-snap-gene-0.129-mRNA-1	maker-scf300000870662.0-snap-gene-11.14-mRNA-1	maker-scf300000870651.0-snap-gene-0.48-mRNA-1
	maker-scf300000870753.0-snap-gene-22.111-mRNA-1	maker-scf300000870753.0-snap-gene-1.103-mRNA-1	maker-scf300000870745.0-snap-gene-0.45-mRNA-1	snap_masked-scf300000870593.0-processed-gene-2.29-mRNA-1	maker-scf300000870603.0-snap-gene-17.22-mRNA-1	maker-scf300000870631.0-snap-gene-3.97-mRNA-1	maker-scf300000870601.1-snap-gene-2.58-mRNA-1	maker-scf300000870743.0-snap-gene-2.4-mRNA-1	maker-scf300000870603.0-snap-gene-12.154-mRNA-1	maker-scf300000870662.0-snap-gene-7.70-mRNA-1	maker-scf300000870603.0-snap-gene-8.18-mRNA-1	maker-scf300000870631.0-snap-gene-0.111-mRNA-1	maker-scf300000870735.0-snap-gene-11.67-mRNA-1		maker-scf300000870603.0-snap-gene-2.12-mRNA-1	maker-scf300000870735.0-snap-gene-14.13-mRNA-1	maker-scf300000870673.2-snap-gene-8.104-mRNA-1	maker-scf300000870754.0-snap-gene-2.2-mRNA-1	maker-scf300000870603.0-augustus-gene-15.7-mRNA-1	maker-scf300000870743.0-snap-gene-2.40-mRNA-1	maker-scf300000870626.0-snap-gene-0.55-mRNA-1	maker-scf300000870631.0-snap-gene-2.18-mRNA-1	maker-scf300000870662.0-snap-gene-11.16-mRNA-1	maker-scf300000870651.1-snap-gene-0.61-mRNA-1
	maker-scf300000870753.0-snap-gene-23.120-mRNA-1	maker-scf300000870753.0-snap-gene-1.83-mRNA-1	maker-scf300000870745.0-snap-gene-0.62-mRNA-1	snap_masked-scf300000870593.0-processed-gene-4.43-mRNA-1	maker-scf300000870603.0-snap-gene-18.100-mRNA-1	maker-scf300000870635.0-snap-gene-0.164-mRNA-1	maker-scf300000870601.1-snap-gene-3.53-mRNA-1	maker-scf300000870743.0-snap-gene-3.114-mRNA-1	maker-scf300000870603.0-snap-gene-13.59-mRNA-1	maker-scf300000870662.0-snap-gene-7.84-mRNA-1	maker-scf300000870603.0-snap-gene-8.35-mRNA-1	maker-scf300000870631.0-snap-gene-0.125-mRNA-1	maker-scf300000870735.0-snap-gene-12.53-mRNA-1		maker-scf300000870603.0-snap-gene-3.85-mRNA-1	maker-scf300000870735.0-snap-gene-14.36-mRNA-1	maker-scf300000870673.2-snap-gene-8.105-mRNA-1	maker-scf300000870754.0-snap-gene-2.3-mRNA-1	maker-scf300000870603.0-augustus-gene-2.112-mRNA-1	maker-scf300000870743.0-snap-gene-3.121-mRNA-1	maker-scf300000870629.0-snap-gene-0.48-mRNA-1	maker-scf300000870631.0-snap-gene-2.19-mRNA-1	maker-scf300000870662.0-snap-gene-11.24-mRNA-1	maker-scf300000870651.1-snap-gene-2.58-mRNA-1
	maker-scf300000870753.0-snap-gene-23.149-mRNA-1	maker-scf300000870753.0-snap-gene-10.33-mRNA-1	maker-scf300000870745.0-snap-gene-1.17-mRNA-1	snap_masked-scf300000870593.0-processed-gene-5.103-mRNA-1	maker-scf300000870603.0-snap-gene-18.116-mRNA-1	maker-scf300000870635.0-snap-gene-0.186-mRNA-1	maker-scf300000870601.1-snap-gene-3.59-mRNA-1	maker-scf300000870743.0-snap-gene-6.12-mRNA-1	maker-scf300000870603.0-snap-gene-13.75-mRNA-1	maker-scf300000870662.0-snap-gene-9.61-mRNA-1	maker-scf300000870603.0-snap-gene-8.7-mRNA-1	maker-scf300000870631.0-snap-gene-1.68-mRNA-1	maker-scf300000870735.0-snap-gene-12.61-mRNA-1		maker-scf300000870603.0-snap-gene-4.116-mRNA-1	maker-scf300000870735.0-snap-gene-14.42-mRNA-1	maker-scf300000870673.2-snap-gene-9.110-mRNA-1	maker-scf300000870754.0-snap-gene-3.4-mRNA-1	maker-scf300000870603.0-augustus-gene-9.75-mRNA-1	maker-scf300000870743.0-snap-gene-5.27-mRNA-1	maker-scf300000870629.0-snap-gene-0.60-mRNA-1	maker-scf300000870631.0-snap-gene-2.21-mRNA-1	maker-scf300000870662.0-snap-gene-12.83-mRNA-1	maker-scf300000870651.1-snap-gene-2.72-mRNA-1
	maker-scf300000870753.0-snap-gene-24.48-mRNA-1	maker-scf300000870753.0-snap-gene-11.118-mRNA-1	maker-scf300000870745.0-snap-gene-2.57-mRNA-1	snap_masked-scf300000870595.0-processed-gene-0.45-mRNA-1	maker-scf300000870603.0-snap-gene-18.119-mRNA-1	maker-scf300000870641.0-snap-gene-0.52-mRNA-1	maker-scf300000870601.1-snap-gene-3.61-mRNA-1	maker-scf300000870744.0-snap-gene-0.49-mRNA-1	maker-scf300000870603.0-snap-gene-14.115-mRNA-1	maker-scf300000870662.0-snap-gene-9.74-mRNA-1	maker-scf300000870603.0-snap-gene-9.131-mRNA-1	maker-scf300000870631.0-snap-gene-2.16-mRNA-1	maker-scf300000870735.0-snap-gene-13.10-mRNA-1		maker-scf300000870603.0-snap-gene-5.19-mRNA-1	maker-scf300000870735.0-snap-gene-2.66-mRNA-1	maker-scf300000870673.2-snap-gene-9.111-mRNA-1	maker-scf300000870754.0-snap-gene-4.41-mRNA-1	maker-scf300000870603.0-augustus-gene-9.86-mRNA-1	maker-scf300000870743.0-snap-gene-5.33-mRNA-1	maker-scf300000870629.0-snap-gene-2.45-mRNA-1	maker-scf300000870631.0-snap-gene-2.22-mRNA-1	maker-scf300000870662.0-snap-gene-12.85-mRNA-1	maker-scf300000870651.1-snap-gene-2.79-mRNA-1
	maker-scf300000870753.0-snap-gene-25.70-mRNA-1	maker-scf300000870753.0-snap-gene-12.54-mRNA-1	maker-scf300000870745.0-snap-gene-2.58-mRNA-1	snap_masked-scf300000870595.0-processed-gene-1.35-mRNA-1	maker-scf300000870603.0-snap-gene-18.124-mRNA-1	maker-scf300000870641.0-snap-gene-0.53-mRNA-1	maker-scf300000870601.1-snap-gene-3.67-mRNA-1	maker-scf300000870744.0-snap-gene-0.60-mRNA-1	maker-scf300000870603.0-snap-gene-14.117-mRNA-1	maker-scf300000870673.0-snap-gene-0.85-mRNA-1	maker-scf300000870603.1-snap-gene-0.74-mRNA-1	maker-scf300000870631.0-snap-gene-3.74-mRNA-1	maker-scf300000870735.0-snap-gene-13.15-mRNA-1		maker-scf300000870603.0-snap-gene-6.49-mRNA-1	maker-scf300000870735.0-snap-gene-2.68-mRNA-1	maker-scf300000870681.0-snap-gene-0.57-mRNA-1	maker-scf300000870754.0-snap-gene-5.115-mRNA-1	maker-scf300000870603.0-snap-gene-0.12-mRNA-1	maker-scf300000870743.0-snap-gene-6.21-mRNA-1	maker-scf300000870629.0-snap-gene-2.63-mRNA-1	maker-scf300000870631.0-snap-gene-2.7-mRNA-1	maker-scf300000870662.0-snap-gene-2.160-mRNA-1	maker-scf300000870651.1-snap-gene-3.66-mRNA-1
	maker-scf300000870753.0-snap-gene-26.151-mRNA-1	maker-scf300000870753.0-snap-gene-12.66-mRNA-1	maker-scf300000870745.0-snap-gene-3.12-mRNA-1	snap_masked-scf300000870595.0-processed-gene-5.106-mRNA-1	maker-scf300000870603.0-snap-gene-2.12-mRNA-1	maker-scf300000870641.0-snap-gene-1.11-mRNA-1	maker-scf300000870601.1-snap-gene-3.70-mRNA-1	maker-scf300000870744.0-snap-gene-2.113-mRNA-1	maker-scf300000870603.0-snap-gene-14.118-mRNA-1	maker-scf300000870673.1-snap-gene-1.196-mRNA-1	maker-scf300000870603.1-snap-gene-0.86-mRNA-1	maker-scf300000870631.0-snap-gene-3.93-mRNA-1	maker-scf300000870735.0-snap-gene-14.31-mRNA-1		maker-scf300000870603.0-snap-gene-6.51-mRNA-1	maker-scf300000870735.0-snap-gene-4.86-mRNA-1	maker-scf300000870693.1-augustus-gene-4.222-mRNA-1	maker-scf300000870754.0-snap-gene-5.118-mRNA-1	maker-scf300000870603.0-snap-gene-1.117-mRNA-1	maker-scf300000870743.0-snap-gene-6.37-mRNA-1	maker-scf300000870629.0-snap-gene-4.108-mRNA-1	maker-scf300000870631.0-snap-gene-3.87-mRNA-1	maker-scf300000870662.0-snap-gene-3.67-mRNA-1	maker-scf300000870651.1-snap-gene-4.70-mRNA-1
	maker-scf300000870753.0-snap-gene-6.4-mRNA-1	maker-scf300000870753.0-snap-gene-14.1-mRNA-1	maker-scf300000870745.0-snap-gene-3.27-mRNA-1	snap_masked-scf300000870595.0-processed-gene-5.79-mRNA-1	maker-scf300000870603.0-snap-gene-2.8-mRNA-1	maker-scf300000870641.0-snap-gene-1.12-mRNA-1	maker-scf300000870601.1-snap-gene-4.121-mRNA-1	maker-scf300000870744.0-snap-gene-2.143-mRNA-1	maker-scf300000870603.0-snap-gene-14.130-mRNA-1	maker-scf300000870673.2-snap-gene-1.51-mRNA-1	maker-scf300000870605.0-augustus-gene-0.270-mRNA-1	maker-scf300000870631.0-snap-gene-4.51-mRNA-1	maker-scf300000870735.0-snap-gene-14.43-mRNA-1		maker-scf300000870603.0-snap-gene-6.58-mRNA-1	maker-scf300000870735.0-snap-gene-5.2-mRNA-1	maker-scf300000870693.1-snap-gene-0.60-mRNA-1	maker-scf300000870754.0-snap-gene-5.126-mRNA-1	maker-scf300000870603.0-snap-gene-1.120-mRNA-1	maker-scf300000870744.0-snap-gene-0.51-mRNA-1	maker-scf300000870629.0-snap-gene-5.27-mRNA-1	maker-scf300000870631.0-snap-gene-3.88-mRNA-1	maker-scf300000870662.0-snap-gene-3.76-mRNA-1	maker-scf300000870651.1-snap-gene-4.77-mRNA-1
	maker-scf300000870753.0-snap-gene-8.118-mRNA-1	maker-scf300000870753.0-snap-gene-16.14-mRNA-1	maker-scf300000870746.0-snap-gene-10.64-mRNA-1	snap_masked-scf300000870595.0-processed-gene-6.171-mRNA-1	maker-scf300000870603.0-snap-gene-3.64-mRNA-1	maker-scf300000870641.0-snap-gene-1.17-mRNA-1	maker-scf300000870601.1-snap-gene-4.122-mRNA-1	maker-scf300000870744.1-snap-gene-1.58-mRNA-1	maker-scf300000870603.0-snap-gene-15.144-mRNA-1	maker-scf300000870673.2-snap-gene-1.52-mRNA-1	maker-scf300000870605.0-snap-gene-0.113-mRNA-1	maker-scf300000870631.0-snap-gene-4.55-mRNA-1	maker-scf300000870735.0-snap-gene-14.6-mRNA-1		maker-scf300000870603.0-snap-gene-6.65-mRNA-1	maker-scf300000870735.0-snap-gene-6.1-mRNA-1	maker-scf300000870693.1-snap-gene-1.116-mRNA-1	maker-scf300000870754.0-snap-gene-5.98-mRNA-1	maker-scf300000870603.0-snap-gene-10.1-mRNA-1	maker-scf300000870744.0-snap-gene-0.56-mRNA-1	maker-scf300000870631.0-snap-gene-0.111-mRNA-1	maker-scf300000870631.0-snap-gene-3.99-mRNA-1	maker-scf300000870662.0-snap-gene-4.52-mRNA-1	maker-scf300000870651.1-snap-gene-5.140-mRNA-1
	maker-scf300000870753.0-snap-gene-9.38-mRNA-1	maker-scf300000870753.0-snap-gene-17.19-mRNA-1	maker-scf300000870746.0-snap-gene-11.129-mRNA-1	snap_masked-scf300000870595.0-processed-gene-6.185-mRNA-1	maker-scf300000870603.0-snap-gene-3.78-mRNA-1	maker-scf300000870641.0-snap-gene-1.19-mRNA-1	maker-scf300000870601.1-snap-gene-4.129-mRNA-1	maker-scf300000870744.1-snap-gene-3.2-mRNA-1	maker-scf300000870603.0-snap-gene-16.59-mRNA-1	maker-scf300000870673.2-snap-gene-1.57-mRNA-1	maker-scf300000870605.0-snap-gene-0.122-mRNA-1	maker-scf300000870631.0-snap-gene-4.58-mRNA-1	maker-scf300000870735.0-snap-gene-2.58-mRNA-1		maker-scf300000870603.0-snap-gene-7.10-mRNA-1	maker-scf300000870735.0-snap-gene-7.59-mRNA-1	maker-scf300000870693.1-snap-gene-3.30-mRNA-1	maker-scf300000870754.0-snap-gene-6.65-mRNA-1	maker-scf300000870603.0-snap-gene-10.14-mRNA-1	maker-scf300000870744.0-snap-gene-1.85-mRNA-1	maker-scf300000870631.0-snap-gene-0.112-mRNA-1	maker-scf300000870631.0-snap-gene-4.47-mRNA-1	maker-scf300000870662.0-snap-gene-4.64-mRNA-1	maker-scf300000870651.1-snap-gene-6.125-mRNA-1
	maker-scf300000870753.0-snap-gene-9.50-mRNA-1	maker-scf300000870753.0-snap-gene-19.1-mRNA-1	maker-scf300000870746.0-snap-gene-12.111-mRNA-1	snap_masked-scf300000870595.1-processed-gene-0.88-mRNA-1	maker-scf300000870603.0-snap-gene-5.13-mRNA-1	maker-scf300000870641.0-snap-gene-2.102-mRNA-1	maker-scf300000870601.1-snap-gene-4.136-mRNA-1	maker-scf300000870744.1-snap-gene-3.22-mRNA-1	maker-scf300000870603.0-snap-gene-16.60-mRNA-1	maker-scf300000870673.2-snap-gene-10.150-mRNA-1	maker-scf300000870605.0-snap-gene-0.139-mRNA-1	maker-scf300000870631.0-snap-gene-4.67-mRNA-1	maker-scf300000870735.0-snap-gene-2.62-mRNA-1		maker-scf300000870603.0-snap-gene-7.2-mRNA-1	maker-scf300000870735.0-snap-gene-9.56-mRNA-1	maker-scf300000870693.1-snap-gene-3.39-mRNA-1	maker-scf300000870754.0-snap-gene-6.81-mRNA-1	maker-scf300000870603.0-snap-gene-10.15-mRNA-1	maker-scf300000870744.0-snap-gene-2.108-mRNA-1	maker-scf300000870631.0-snap-gene-0.129-mRNA-1	maker-scf300000870631.0-snap-gene-4.50-mRNA-1	maker-scf300000870662.0-snap-gene-4.76-mRNA-1	maker-scf300000870651.1-snap-gene-6.127-mRNA-1
	maker-scf300000870754.0-augustus-gene-9.118-mRNA-1	maker-scf300000870753.0-snap-gene-20.19-mRNA-1	maker-scf300000870746.0-snap-gene-13.164-mRNA-1	snap_masked-scf300000870595.1-processed-gene-1.86-mRNA-1	maker-scf300000870603.0-snap-gene-5.21-mRNA-1	maker-scf300000870641.0-snap-gene-2.106-mRNA-1	maker-scf300000870601.1-snap-gene-5.12-mRNA-1	maker-scf300000870744.1-snap-gene-3.3-mRNA-1	maker-scf300000870603.0-snap-gene-16.61-mRNA-1	maker-scf300000870673.2-snap-gene-12.82-mRNA-1	maker-scf300000870607.0-snap-gene-0.0-mRNA-1	maker-scf300000870631.0-snap-gene-5.109-mRNA-1	maker-scf300000870735.0-snap-gene-2.70-mRNA-1		maker-scf300000870603.0-snap-gene-8.15-mRNA-1	maker-scf300000870735.0-snap-gene-9.62-mRNA-1	maker-scf300000870693.1-snap-gene-3.70-mRNA-1	maker-scf300000870754.0-snap-gene-7.135-mRNA-1	maker-scf300000870603.0-snap-gene-10.17-mRNA-1	maker-scf300000870744.0-snap-gene-2.123-mRNA-1	maker-scf300000870631.0-snap-gene-1.58-mRNA-1	maker-scf300000870631.0-snap-gene-4.57-mRNA-1	maker-scf300000870662.0-snap-gene-5.126-mRNA-1	maker-scf300000870651.1-snap-gene-6.94-mRNA-1
	maker-scf300000870754.0-snap-gene-0.109-mRNA-1	maker-scf300000870753.0-snap-gene-21.103-mRNA-1	maker-scf300000870746.0-snap-gene-2.57-mRNA-1	snap_masked-scf300000870595.1-processed-gene-2.197-mRNA-1	maker-scf300000870603.0-snap-gene-5.7-mRNA-1	maker-scf300000870641.0-snap-gene-2.125-mRNA-1	maker-scf300000870601.1-snap-gene-5.15-mRNA-1	maker-scf300000870745.0-augustus-gene-1.125-mRNA-1	maker-scf300000870603.0-snap-gene-16.72-mRNA-1	maker-scf300000870673.2-snap-gene-14.60-mRNA-1	maker-scf300000870607.0-snap-gene-0.15-mRNA-1	maker-scf300000870631.0-snap-gene-5.116-mRNA-1	maker-scf300000870735.0-snap-gene-3.60-mRNA-1		maker-scf300000870603.0-snap-gene-8.16-mRNA-1	maker-scf300000870735.0-snap-gene-9.64-mRNA-1	maker-scf300000870693.1-snap-gene-4.59-mRNA-1	maker-scf300000870754.0-snap-gene-7.144-mRNA-1	maker-scf300000870603.0-snap-gene-10.2-mRNA-1	maker-scf300000870744.1-snap-gene-1.70-mRNA-1	maker-scf300000870631.0-snap-gene-1.61-mRNA-1	maker-scf300000870631.0-snap-gene-5.101-mRNA-1	maker-scf300000870662.0-snap-gene-5.129-mRNA-1	maker-scf300000870662.0-snap-gene-0.4-mRNA-1
	maker-scf300000870754.0-snap-gene-0.99-mRNA-1	maker-scf300000870753.0-snap-gene-21.106-mRNA-1	maker-scf300000870746.0-snap-gene-3.11-mRNA-1	snap_masked-scf300000870601.0-processed-gene-1.99-mRNA-1	maker-scf300000870603.0-snap-gene-6.50-mRNA-1	maker-scf300000870641.1-snap-gene-0.13-mRNA-1	maker-scf300000870601.1-snap-gene-6.120-mRNA-1	maker-scf300000870745.0-snap-gene-0.52-mRNA-1	maker-scf300000870603.0-snap-gene-17.14-mRNA-1	maker-scf300000870673.2-snap-gene-14.61-mRNA-1	maker-scf300000870607.0-snap-gene-1.10-mRNA-1	maker-scf300000870631.0-snap-gene-5.120-mRNA-1	maker-scf300000870735.0-snap-gene-3.70-mRNA-1		maker-scf300000870603.0-snap-gene-8.17-mRNA-1	maker-scf300000870735.0-snap-gene-9.65-mRNA-1	maker-scf300000870693.1-snap-gene-4.62-mRNA-1	maker-scf300000870754.0-snap-gene-8.32-mRNA-1	maker-scf300000870603.0-snap-gene-10.24-mRNA-1	maker-scf300000870744.1-snap-gene-1.79-mRNA-1	maker-scf300000870631.0-snap-gene-1.64-mRNA-1	maker-scf300000870631.0-snap-gene-5.114-mRNA-1	maker-scf300000870662.0-snap-gene-5.130-mRNA-1	maker-scf300000870662.0-snap-gene-1.4-mRNA-1
	maker-scf300000870754.0-snap-gene-1.80-mRNA-1	maker-scf300000870753.0-snap-gene-21.121-mRNA-1	maker-scf300000870746.0-snap-gene-3.14-mRNA-1	snap_masked-scf300000870601.0-processed-gene-11.78-mRNA-1	maker-scf300000870603.0-snap-gene-6.58-mRNA-1	maker-scf300000870641.1-snap-gene-0.16-mRNA-1	maker-scf300000870601.1-snap-gene-6.145-mRNA-1	maker-scf300000870745.0-snap-gene-1.23-mRNA-1	maker-scf300000870603.0-snap-gene-17.18-mRNA-1	maker-scf300000870673.2-snap-gene-14.71-mRNA-1	maker-scf300000870607.0-snap-gene-1.15-mRNA-1	maker-scf300000870635.0-snap-gene-0.171-mRNA-1	maker-scf300000870735.0-snap-gene-4.79-mRNA-1		maker-scf300000870603.0-snap-gene-8.19-mRNA-1	maker-scf300000870743.0-snap-gene-1.54-mRNA-1	maker-scf300000870693.1-snap-gene-4.66-mRNA-1	maker-scf300000870754.0-snap-gene-8.58-mRNA-1	maker-scf300000870603.0-snap-gene-10.25-mRNA-1	maker-scf300000870744.1-snap-gene-1.86-mRNA-1	maker-scf300000870631.0-snap-gene-2.1-mRNA-1	maker-scf300000870631.0-snap-gene-5.119-mRNA-1	maker-scf300000870662.0-snap-gene-5.132-mRNA-1	maker-scf300000870662.0-snap-gene-11.11-mRNA-1
	maker-scf300000870754.0-snap-gene-10.1-mRNA-1	maker-scf300000870753.0-snap-gene-22.121-mRNA-1	maker-scf300000870746.0-snap-gene-3.28-mRNA-1	snap_masked-scf300000870601.0-processed-gene-13.60-mRNA-1	maker-scf300000870603.0-snap-gene-6.62-mRNA-1	maker-scf300000870641.1-snap-gene-0.27-mRNA-1	maker-scf300000870603.0-augustus-gene-0.82-mRNA-1	maker-scf300000870745.0-snap-gene-2.39-mRNA-1	maker-scf300000870603.0-snap-gene-17.20-mRNA-1	maker-scf300000870673.2-snap-gene-14.77-mRNA-1	maker-scf300000870607.0-snap-gene-1.27-mRNA-1	maker-scf300000870635.0-snap-gene-0.190-mRNA-1	maker-scf300000870735.0-snap-gene-4.87-mRNA-1		maker-scf300000870603.0-snap-gene-8.20-mRNA-1	maker-scf300000870743.0-snap-gene-3.121-mRNA-1	maker-scf300000870693.1-snap-gene-4.67-mRNA-1	maker-scf300000870754.0-snap-gene-8.63-mRNA-1	maker-scf300000870603.0-snap-gene-10.26-mRNA-1	maker-scf300000870744.1-snap-gene-2.56-mRNA-1	maker-scf300000870631.0-snap-gene-2.17-mRNA-1	maker-scf300000870635.0-snap-gene-0.164-mRNA-1	maker-scf300000870662.0-snap-gene-5.144-mRNA-1	maker-scf300000870662.0-snap-gene-11.14-mRNA-1
	maker-scf300000870754.0-snap-gene-10.21-mRNA-1	maker-scf300000870753.0-snap-gene-22.125-mRNA-1	maker-scf300000870746.0-snap-gene-3.29-mRNA-1	snap_masked-scf300000870601.0-processed-gene-14.39-mRNA-1	maker-scf300000870603.0-snap-gene-7.6-mRNA-1	maker-scf300000870642.0-snap-gene-0.7-mRNA-1	maker-scf300000870603.0-augustus-gene-8.83-mRNA-1	maker-scf300000870745.0-snap-gene-2.58-mRNA-1	maker-scf300000870603.0-snap-gene-18.108-mRNA-1	maker-scf300000870673.2-snap-gene-14.97-mRNA-1	maker-scf300000870607.1-snap-gene-0.7-mRNA-1	maker-scf300000870641.0-snap-gene-0.53-mRNA-1	maker-scf300000870735.0-snap-gene-6.12-mRNA-1		maker-scf300000870603.0-snap-gene-8.24-mRNA-1	maker-scf300000870743.0-snap-gene-4.121-mRNA-1	maker-scf300000870693.1-snap-gene-4.81-mRNA-1	maker-scf300000870756.2-snap-gene-0.30-mRNA-1	maker-scf300000870603.0-snap-gene-10.28-mRNA-1	maker-scf300000870744.1-snap-gene-3.26-mRNA-1	maker-scf300000870631.0-snap-gene-2.18-mRNA-1	maker-scf300000870635.0-snap-gene-0.185-mRNA-1	maker-scf300000870662.0-snap-gene-6.0-mRNA-1	maker-scf300000870662.0-snap-gene-2.160-mRNA-1
	maker-scf300000870754.0-snap-gene-10.8-mRNA-1	maker-scf300000870753.0-snap-gene-23.132-mRNA-1	maker-scf300000870746.0-snap-gene-5.139-mRNA-1	snap_masked-scf300000870601.0-processed-gene-15.45-mRNA-1	maker-scf300000870603.0-snap-gene-8.33-mRNA-1	maker-scf300000870642.2-snap-gene-0.51-mRNA-1	maker-scf300000870603.0-snap-gene-0.0-mRNA-1	maker-scf300000870745.0-snap-gene-3.25-mRNA-1	maker-scf300000870603.0-snap-gene-2.10-mRNA-1	maker-scf300000870673.2-snap-gene-15.110-mRNA-1	maker-scf300000870611.0-snap-gene-0.128-mRNA-1	maker-scf300000870641.0-snap-gene-1.17-mRNA-1	maker-scf300000870735.0-snap-gene-8.124-mRNA-1		maker-scf300000870603.0-snap-gene-8.25-mRNA-1	maker-scf300000870744.0-snap-gene-0.56-mRNA-1	maker-scf300000870693.1-snap-gene-4.82-mRNA-1	snap_masked-scf300000870586.0-processed-gene-0.11-mRNA-1	maker-scf300000870603.0-snap-gene-10.30-mRNA-1	maker-scf300000870744.1-snap-gene-5.23-mRNA-1	maker-scf300000870631.0-snap-gene-2.19-mRNA-1	maker-scf300000870641.0-snap-gene-0.48-mRNA-1	maker-scf300000870662.0-snap-gene-6.11-mRNA-1	maker-scf300000870662.0-snap-gene-3.55-mRNA-1
	maker-scf300000870754.0-snap-gene-12.206-mRNA-1	maker-scf300000870753.0-snap-gene-3.52-mRNA-1	maker-scf300000870746.0-snap-gene-6.124-mRNA-1	snap_masked-scf300000870601.0-processed-gene-15.77-mRNA-1	maker-scf300000870603.0-snap-gene-9.119-mRNA-1	maker-scf300000870642.2-snap-gene-0.52-mRNA-1	maker-scf300000870603.0-snap-gene-0.20-mRNA-1	maker-scf300000870745.0-snap-gene-3.38-mRNA-1	maker-scf300000870603.0-snap-gene-2.9-mRNA-1	maker-scf300000870673.2-snap-gene-15.112-mRNA-1	maker-scf300000870611.0-snap-gene-0.144-mRNA-1	maker-scf300000870641.0-snap-gene-1.38-mRNA-1	maker-scf300000870735.0-snap-gene-9.55-mRNA-1		maker-scf300000870603.0-snap-gene-8.34-mRNA-1	maker-scf300000870744.0-snap-gene-1.85-mRNA-1	maker-scf300000870699.0-snap-gene-0.2-mRNA-1	snap_masked-scf300000870586.0-processed-gene-1.90-mRNA-1	maker-scf300000870603.0-snap-gene-10.31-mRNA-1	maker-scf300000870744.1-snap-gene-5.32-mRNA-1	maker-scf300000870631.0-snap-gene-2.2-mRNA-1	maker-scf300000870641.0-snap-gene-0.49-mRNA-1	maker-scf300000870662.0-snap-gene-6.15-mRNA-1	maker-scf300000870662.0-snap-gene-3.56-mRNA-1
	maker-scf300000870754.0-snap-gene-12.223-mRNA-1	maker-scf300000870753.0-snap-gene-4.68-mRNA-1	maker-scf300000870746.0-snap-gene-6.137-mRNA-1	snap_masked-scf300000870601.0-processed-gene-16.100-mRNA-1	maker-scf300000870603.1-snap-gene-0.73-mRNA-1	maker-scf300000870651.0-snap-gene-0.48-mRNA-1	maker-scf300000870603.0-snap-gene-0.8-mRNA-1	maker-scf300000870745.0-snap-gene-3.45-mRNA-1	maker-scf300000870603.0-snap-gene-3.78-mRNA-1	maker-scf300000870673.2-snap-gene-15.135-mRNA-1	maker-scf300000870611.0-snap-gene-0.147-mRNA-1	maker-scf300000870641.0-snap-gene-2.101-mRNA-1	maker-scf300000870735.0-snap-gene-9.63-mRNA-1		maker-scf300000870603.0-snap-gene-8.35-mRNA-1	maker-scf300000870744.0-snap-gene-2.106-mRNA-1	maker-scf300000870701.0-snap-gene-0.0-mRNA-1	snap_masked-scf300000870586.0-processed-gene-1.93-mRNA-1	maker-scf300000870603.0-snap-gene-10.32-mRNA-1	maker-scf300000870744.1-snap-gene-5.34-mRNA-1	maker-scf300000870631.0-snap-gene-2.21-mRNA-1	maker-scf300000870641.0-snap-gene-0.50-mRNA-1	maker-scf300000870662.0-snap-gene-6.16-mRNA-1	maker-scf300000870662.0-snap-gene-3.66-mRNA-1
	maker-scf300000870754.0-snap-gene-12.226-mRNA-1	maker-scf300000870753.0-snap-gene-4.77-mRNA-1	maker-scf300000870746.0-snap-gene-7.53-mRNA-1	snap_masked-scf300000870601.0-processed-gene-17.44-mRNA-1	maker-scf300000870605.0-snap-gene-0.118-mRNA-1	maker-scf300000870651.0-snap-gene-0.52-mRNA-1	maker-scf300000870603.0-snap-gene-1.106-mRNA-1	maker-scf300000870746.0-snap-gene-0.53-mRNA-1	maker-scf300000870603.0-snap-gene-3.79-mRNA-1	maker-scf300000870673.2-snap-gene-15.90-mRNA-1	maker-scf300000870613.0-snap-gene-0.1-mRNA-1	maker-scf300000870641.0-snap-gene-2.102-mRNA-1	maker-scf300000870736.0-snap-gene-0.5-mRNA-1		maker-scf300000870603.0-snap-gene-8.5-mRNA-1	maker-scf300000870744.0-snap-gene-2.108-mRNA-1	maker-scf300000870707.0-snap-gene-0.5-mRNA-1	snap_masked-scf300000870586.0-processed-gene-3.38-mRNA-1	maker-scf300000870603.0-snap-gene-10.6-mRNA-1	maker-scf300000870744.1-snap-gene-5.45-mRNA-1	maker-scf300000870631.0-snap-gene-2.22-mRNA-1	maker-scf300000870641.0-snap-gene-1.11-mRNA-1	maker-scf300000870662.0-snap-gene-6.4-mRNA-1	maker-scf300000870662.0-snap-gene-3.70-mRNA-1
	maker-scf300000870754.0-snap-gene-3.12-mRNA-1	maker-scf300000870753.0-snap-gene-6.19-mRNA-1	maker-scf300000870746.0-snap-gene-7.58-mRNA-1	snap_masked-scf300000870601.0-processed-gene-18.46-mRNA-1	maker-scf300000870605.0-snap-gene-0.123-mRNA-1	maker-scf300000870651.1-augustus-gene-1.116-mRNA-1	maker-scf300000870603.0-snap-gene-1.116-mRNA-1	maker-scf300000870746.0-snap-gene-1.28-mRNA-1	maker-scf300000870603.0-snap-gene-3.82-mRNA-1	maker-scf300000870673.2-snap-gene-15.97-mRNA-1	maker-scf300000870613.1-snap-gene-0.127-mRNA-1	maker-scf300000870641.0-snap-gene-2.108-mRNA-1	maker-scf300000870743.0-snap-gene-1.80-mRNA-1		maker-scf300000870603.0-snap-gene-9.113-mRNA-1	maker-scf300000870744.0-snap-gene-2.123-mRNA-1	maker-scf300000870733.0-snap-gene-0.202-mRNA-1	snap_masked-scf300000870586.0-processed-gene-3.55-mRNA-1	maker-scf300000870603.0-snap-gene-12.115-mRNA-1	maker-scf300000870745.0-snap-gene-0.51-mRNA-1	maker-scf300000870631.0-snap-gene-2.8-mRNA-1	maker-scf300000870641.0-snap-gene-1.15-mRNA-1	maker-scf300000870668.0-snap-gene-0.1-mRNA-1	maker-scf300000870662.0-snap-gene-4.55-mRNA-1
	maker-scf300000870754.0-snap-gene-4.38-mRNA-1	maker-scf300000870753.0-snap-gene-6.4-mRNA-1	maker-scf300000870746.0-snap-gene-8.63-mRNA-1	snap_masked-scf300000870601.0-processed-gene-19.160-mRNA-1	maker-scf300000870605.0-snap-gene-0.139-mRNA-1	maker-scf300000870651.1-augustus-gene-1.117-mRNA-1	maker-scf300000870603.0-snap-gene-1.119-mRNA-1	maker-scf300000870746.0-snap-gene-1.5-mRNA-1	maker-scf300000870603.0-snap-gene-4.107-mRNA-1	maker-scf300000870673.2-snap-gene-3.114-mRNA-1	maker-scf300000870613.1-snap-gene-0.136-mRNA-1	maker-scf300000870641.0-snap-gene-2.113-mRNA-1	maker-scf300000870743.0-snap-gene-2.17-mRNA-1		maker-scf300000870603.0-snap-gene-9.114-mRNA-1	maker-scf300000870744.0-snap-gene-2.149-mRNA-1	maker-scf300000870733.0-snap-gene-0.241-mRNA-1	snap_masked-scf300000870593.0-processed-gene-1.52-mRNA-1	maker-scf300000870603.0-snap-gene-12.121-mRNA-1	maker-scf300000870745.0-snap-gene-1.12-mRNA-1	maker-scf300000870631.0-snap-gene-3.87-mRNA-1	maker-scf300000870641.0-snap-gene-1.37-mRNA-1	maker-scf300000870673.0-snap-gene-0.92-mRNA-1	maker-scf300000870662.0-snap-gene-4.76-mRNA-1
	maker-scf300000870754.0-snap-gene-6.63-mRNA-1	maker-scf300000870753.0-snap-gene-7.137-mRNA-1	maker-scf300000870747.0-snap-gene-0.3-mRNA-1	snap_masked-scf300000870601.0-processed-gene-19.62-mRNA-1	maker-scf300000870607.0-snap-gene-0.0-mRNA-1	maker-scf300000870651.1-augustus-gene-2.49-mRNA-1	maker-scf300000870603.0-snap-gene-11.64-mRNA-1	maker-scf300000870746.0-snap-gene-10.77-mRNA-1	maker-scf300000870603.0-snap-gene-4.113-mRNA-1	maker-scf300000870673.2-snap-gene-4.68-mRNA-1	maker-scf300000870613.1-snap-gene-0.152-mRNA-1	maker-scf300000870641.0-snap-gene-2.122-mRNA-1	maker-scf300000870743.0-snap-gene-2.18-mRNA-1		maker-scf300000870603.0-snap-gene-9.117-mRNA-1	maker-scf300000870744.1-augustus-gene-1.13-mRNA-1	maker-scf300000870735.0-snap-gene-1.11-mRNA-1	snap_masked-scf300000870593.0-processed-gene-4.43-mRNA-1	maker-scf300000870603.0-snap-gene-12.153-mRNA-1	maker-scf300000870745.0-snap-gene-3.41-mRNA-1	maker-scf300000870631.0-snap-gene-3.99-mRNA-1	maker-scf300000870641.0-snap-gene-2.100-mRNA-1	maker-scf300000870673.1-snap-gene-0.5-mRNA-1	maker-scf300000870662.0-snap-gene-5.123-mRNA-1
	maker-scf300000870754.0-snap-gene-7.131-mRNA-1	maker-scf300000870753.0-snap-gene-7.138-mRNA-1	maker-scf300000870748.0-snap-gene-3.28-mRNA-1	snap_masked-scf300000870601.0-processed-gene-19.98-mRNA-1	maker-scf300000870607.0-snap-gene-0.9-mRNA-1	maker-scf300000870651.1-snap-gene-0.69-mRNA-1	maker-scf300000870603.0-snap-gene-11.79-mRNA-1	maker-scf300000870746.0-snap-gene-13.167-mRNA-1	maker-scf300000870603.0-snap-gene-4.116-mRNA-1	maker-scf300000870673.2-snap-gene-5.54-mRNA-1	maker-scf300000870613.1-snap-gene-0.156-mRNA-1	maker-scf300000870641.0-snap-gene-2.123-mRNA-1	maker-scf300000870743.0-snap-gene-2.9-mRNA-1		maker-scf300000870603.0-snap-gene-9.128-mRNA-1	maker-scf300000870744.1-snap-gene-0.1-mRNA-1	maker-scf300000870735.0-snap-gene-1.23-mRNA-1	snap_masked-scf300000870593.0-processed-gene-5.103-mRNA-1	maker-scf300000870603.0-snap-gene-13.73-mRNA-1	maker-scf300000870745.0-snap-gene-3.46-mRNA-1	maker-scf300000870631.0-snap-gene-4.50-mRNA-1	maker-scf300000870641.0-snap-gene-2.105-mRNA-1	maker-scf300000870673.1-snap-gene-1.187-mRNA-1	maker-scf300000870662.0-snap-gene-5.126-mRNA-1
	maker-scf300000870756.2-snap-gene-0.35-mRNA-1	maker-scf300000870753.0-snap-gene-8.113-mRNA-1	maker-scf300000870748.0-snap-gene-4.175-mRNA-1	snap_masked-scf300000870601.0-processed-gene-4.57-mRNA-1	maker-scf300000870607.0-snap-gene-1.10-mRNA-1	maker-scf300000870651.1-snap-gene-1.11-mRNA-1	maker-scf300000870603.0-snap-gene-11.83-mRNA-1	maker-scf300000870746.0-snap-gene-13.172-mRNA-1	maker-scf300000870603.0-snap-gene-4.117-mRNA-1	maker-scf300000870673.2-snap-gene-5.60-mRNA-1	maker-scf300000870619.2-snap-gene-0.46-mRNA-1	maker-scf300000870641.1-snap-gene-0.12-mRNA-1	maker-scf300000870743.0-snap-gene-3.114-mRNA-1		maker-scf300000870603.0-snap-gene-9.130-mRNA-1	maker-scf300000870744.1-snap-gene-1.76-mRNA-1	maker-scf300000870735.0-snap-gene-1.32-mRNA-1	snap_masked-scf300000870593.0-processed-gene-7.154-mRNA-1	maker-scf300000870603.0-snap-gene-14.130-mRNA-1	maker-scf300000870746.0-snap-gene-10.64-mRNA-1	maker-scf300000870631.0-snap-gene-4.64-mRNA-1	maker-scf300000870641.0-snap-gene-2.86-mRNA-1	maker-scf300000870673.1-snap-gene-1.191-mRNA-1	maker-scf300000870662.0-snap-gene-5.142-mRNA-1
	snap_masked-scf300000870586.0-processed-gene-1.90-mRNA-1	maker-scf300000870753.0-snap-gene-9.53-mRNA-1	maker-scf300000870748.0-snap-gene-4.183-mRNA-1	snap_masked-scf300000870601.0-processed-gene-7.94-mRNA-1	maker-scf300000870607.0-snap-gene-1.11-mRNA-1	maker-scf300000870651.1-snap-gene-1.9-mRNA-1	maker-scf300000870603.0-snap-gene-11.85-mRNA-1	maker-scf300000870746.0-snap-gene-5.131-mRNA-1	maker-scf300000870603.0-snap-gene-4.120-mRNA-1	maker-scf300000870673.2-snap-gene-5.62-mRNA-1	maker-scf300000870619.2-snap-gene-0.64-mRNA-1	maker-scf300000870641.1-snap-gene-0.13-mRNA-1	maker-scf300000870743.0-snap-gene-6.20-mRNA-1		maker-scf300000870603.0-snap-gene-9.137-mRNA-1	maker-scf300000870744.1-snap-gene-3.26-mRNA-1	maker-scf300000870735.0-snap-gene-10.77-mRNA-1	snap_masked-scf300000870595.0-processed-gene-0.37-mRNA-1	maker-scf300000870603.0-snap-gene-15.143-mRNA-1	maker-scf300000870746.0-snap-gene-11.120-mRNA-1	maker-scf300000870631.0-snap-gene-5.108-mRNA-1	maker-scf300000870641.1-snap-gene-0.11-mRNA-1	maker-scf300000870673.1-snap-gene-1.203-mRNA-1	maker-scf300000870662.0-snap-gene-5.143-mRNA-1
	snap_masked-scf300000870586.0-processed-gene-2.76-mRNA-1	maker-scf300000870754.0-snap-gene-1.82-mRNA-1	maker-scf300000870748.0-snap-gene-4.195-mRNA-1	snap_masked-scf300000870601.0-processed-gene-8.69-mRNA-1	maker-scf300000870607.0-snap-gene-1.26-mRNA-1	maker-scf300000870651.1-snap-gene-2.58-mRNA-1	maker-scf300000870603.0-snap-gene-12.125-mRNA-1	maker-scf300000870746.0-snap-gene-5.152-mRNA-1	maker-scf300000870603.0-snap-gene-5.21-mRNA-1	maker-scf300000870673.2-snap-gene-5.78-mRNA-1	maker-scf300000870619.2-snap-gene-1.70-mRNA-1	maker-scf300000870641.1-snap-gene-0.28-mRNA-1	maker-scf300000870744.0-snap-gene-2.104-mRNA-1		maker-scf300000870603.0-snap-gene-9.147-mRNA-1	maker-scf300000870744.1-snap-gene-4.65-mRNA-1	maker-scf300000870735.0-snap-gene-10.87-mRNA-1	snap_masked-scf300000870595.0-processed-gene-0.46-mRNA-1	maker-scf300000870603.0-snap-gene-16.66-mRNA-1	maker-scf300000870746.0-snap-gene-12.125-mRNA-1	maker-scf300000870631.0-snap-gene-5.114-mRNA-1	maker-scf300000870641.1-snap-gene-0.15-mRNA-1	maker-scf300000870673.2-augustus-gene-6.4-mRNA-1	maker-scf300000870662.0-snap-gene-5.144-mRNA-1
	snap_masked-scf300000870586.0-processed-gene-4.54-mRNA-1	maker-scf300000870754.0-snap-gene-10.1-mRNA-1	maker-scf300000870749.0-augustus-gene-7.87-mRNA-1	snap_masked-scf300000870601.0-processed-gene-9.4-mRNA-1	maker-scf300000870607.0-snap-gene-1.28-mRNA-1	maker-scf300000870651.1-snap-gene-2.70-mRNA-1	maker-scf300000870603.0-snap-gene-12.136-mRNA-1	maker-scf300000870746.0-snap-gene-6.116-mRNA-1	maker-scf300000870603.0-snap-gene-5.8-mRNA-1	maker-scf300000870673.2-snap-gene-5.79-mRNA-1	maker-scf300000870619.2-snap-gene-2.15-mRNA-1	maker-scf300000870641.1-snap-gene-0.29-mRNA-1	maker-scf300000870744.0-snap-gene-2.113-mRNA-1		maker-scf300000870603.0-snap-gene-9.152-mRNA-1	maker-scf300000870744.1-snap-gene-5.18-mRNA-1	maker-scf300000870735.0-snap-gene-11.67-mRNA-1	snap_masked-scf300000870595.0-processed-gene-5.99-mRNA-1	maker-scf300000870603.0-snap-gene-16.68-mRNA-1	maker-scf300000870746.0-snap-gene-3.7-mRNA-1	maker-scf300000870631.0-snap-gene-5.119-mRNA-1	maker-scf300000870641.1-snap-gene-0.17-mRNA-1	maker-scf300000870673.2-snap-gene-0.11-mRNA-1	maker-scf300000870662.0-snap-gene-6.16-mRNA-1
	snap_masked-scf300000870586.0-processed-gene-4.56-mRNA-1	maker-scf300000870754.0-snap-gene-10.3-mRNA-1	maker-scf300000870749.0-snap-gene-0.44-mRNA-1	snap_masked-scf300000870601.0-processed-gene-9.44-mRNA-1	maker-scf300000870607.0-snap-gene-1.31-mRNA-1	maker-scf300000870651.1-snap-gene-2.81-mRNA-1	maker-scf300000870603.0-snap-gene-12.139-mRNA-1	maker-scf300000870746.0-snap-gene-6.133-mRNA-1	maker-scf300000870603.0-snap-gene-6.61-mRNA-1	maker-scf300000870673.2-snap-gene-7.61-mRNA-1	maker-scf300000870619.2-snap-gene-2.27-mRNA-1	maker-scf300000870641.1-snap-gene-0.30-mRNA-1	maker-scf300000870744.0-snap-gene-2.137-mRNA-1		maker-scf300000870603.1-augustus-gene-0.146-mRNA-1	maker-scf300000870744.1-snap-gene-5.29-mRNA-1	maker-scf300000870735.0-snap-gene-13.10-mRNA-1	snap_masked-scf300000870595.1-processed-gene-0.97-mRNA-1	maker-scf300000870603.0-snap-gene-16.70-mRNA-1	maker-scf300000870746.0-snap-gene-4.60-mRNA-1	maker-scf300000870635.0-snap-gene-0.164-mRNA-1	maker-scf300000870641.1-snap-gene-0.22-mRNA-1	maker-scf300000870673.2-snap-gene-0.12-mRNA-1	maker-scf300000870662.0-snap-gene-6.7-mRNA-1
	snap_masked-scf300000870586.0-processed-gene-4.9-mRNA-1	maker-scf300000870754.0-snap-gene-11.23-mRNA-1	maker-scf300000870749.0-snap-gene-11.5-mRNA-1	snap_masked-scf300000870601.1-processed-gene-1.0-mRNA-1	maker-scf300000870613.1-snap-gene-0.124-mRNA-1	maker-scf300000870651.1-snap-gene-3.73-mRNA-1	maker-scf300000870603.0-snap-gene-12.152-mRNA-1	maker-scf300000870746.0-snap-gene-7.53-mRNA-1	maker-scf300000870603.0-snap-gene-7.1-mRNA-1	maker-scf300000870673.2-snap-gene-8.83-mRNA-1	maker-scf300000870619.2-snap-gene-3.127-mRNA-1	maker-scf300000870642.2-snap-gene-0.56-mRNA-1	maker-scf300000870744.1-snap-gene-0.7-mRNA-1		maker-scf300000870603.1-snap-gene-0.60-mRNA-1	maker-scf300000870744.1-snap-gene-5.32-mRNA-1	maker-scf300000870735.0-snap-gene-13.20-mRNA-1	snap_masked-scf300000870601.0-processed-gene-11.42-mRNA-1	maker-scf300000870603.0-snap-gene-16.72-mRNA-1	maker-scf300000870746.0-snap-gene-7.65-mRNA-1	maker-scf300000870635.0-snap-gene-0.172-mRNA-1	maker-scf300000870641.1-snap-gene-0.24-mRNA-1	maker-scf300000870673.2-snap-gene-0.5-mRNA-1	maker-scf300000870662.0-snap-gene-8.3-mRNA-1
	snap_masked-scf300000870593.0-processed-gene-0.86-mRNA-1	maker-scf300000870754.0-snap-gene-11.9-mRNA-1	maker-scf300000870749.0-snap-gene-12.10-mRNA-1	snap_masked-scf300000870601.1-processed-gene-2.20-mRNA-1	maker-scf300000870613.1-snap-gene-0.126-mRNA-1	maker-scf300000870651.1-snap-gene-3.74-mRNA-1	maker-scf300000870603.0-snap-gene-13.53-mRNA-1	maker-scf300000870746.0-snap-gene-9.78-mRNA-1	maker-scf300000870603.0-snap-gene-8.7-mRNA-1	maker-scf300000870673.2-snap-gene-8.85-mRNA-1	maker-scf300000870619.2-snap-gene-3.138-mRNA-1	maker-scf300000870651.0-snap-gene-0.53-mRNA-1	maker-scf300000870744.1-snap-gene-1.58-mRNA-1		maker-scf300000870603.1-snap-gene-0.61-mRNA-1	maker-scf300000870744.1-snap-gene-5.34-mRNA-1	maker-scf300000870735.0-snap-gene-14.37-mRNA-1	snap_masked-scf300000870601.0-processed-gene-18.49-mRNA-1	maker-scf300000870603.0-snap-gene-17.10-mRNA-1	maker-scf300000870746.0-snap-gene-8.63-mRNA-1	maker-scf300000870635.0-snap-gene-0.179-mRNA-1	maker-scf300000870641.1-snap-gene-0.9-mRNA-1	maker-scf300000870673.2-snap-gene-1.55-mRNA-1	maker-scf300000870673.0-snap-gene-0.77-mRNA-1
	snap_masked-scf300000870593.0-processed-gene-1.88-mRNA-1	maker-scf300000870754.0-snap-gene-2.10-mRNA-1	maker-scf300000870749.0-snap-gene-13.90-mRNA-1	snap_masked-scf300000870601.1-processed-gene-2.25-mRNA-1	maker-scf300000870613.1-snap-gene-0.147-mRNA-1	maker-scf300000870651.1-snap-gene-4.70-mRNA-1	maker-scf300000870603.0-snap-gene-13.59-mRNA-1	maker-scf300000870746.0-snap-gene-9.85-mRNA-1	maker-scf300000870603.0-snap-gene-9.131-mRNA-1	maker-scf300000870673.2-snap-gene-9.120-mRNA-1	maker-scf300000870619.2-snap-gene-4.82-mRNA-1	maker-scf300000870651.0-snap-gene-0.56-mRNA-1	maker-scf300000870744.1-snap-gene-2.56-mRNA-1		maker-scf300000870603.1-snap-gene-0.62-mRNA-1	maker-scf300000870744.1-snap-gene-5.44-mRNA-1	maker-scf300000870735.0-snap-gene-14.57-mRNA-1	snap_masked-scf300000870601.0-processed-gene-19.138-mRNA-1	maker-scf300000870603.0-snap-gene-17.18-mRNA-1	maker-scf300000870746.0-snap-gene-9.72-mRNA-1	maker-scf300000870641.0-snap-gene-0.48-mRNA-1	maker-scf300000870642.0-snap-gene-0.18-mRNA-1	maker-scf300000870673.2-snap-gene-1.57-mRNA-1	maker-scf300000870673.1-snap-gene-1.184-mRNA-1
	snap_masked-scf300000870593.0-processed-gene-2.45-mRNA-1	maker-scf300000870754.0-snap-gene-2.13-mRNA-1	maker-scf300000870749.0-snap-gene-14.108-mRNA-1	snap_masked-scf300000870601.1-processed-gene-2.3-mRNA-1	maker-scf300000870613.1-snap-gene-0.159-mRNA-1	maker-scf300000870651.1-snap-gene-4.72-mRNA-1	maker-scf300000870603.0-snap-gene-13.61-mRNA-1	maker-scf300000870748.0-snap-gene-0.93-mRNA-1	maker-scf300000870603.1-snap-gene-0.74-mRNA-1	maker-scf300000870673.2-snap-gene-9.123-mRNA-1	maker-scf300000870619.2-snap-gene-4.83-mRNA-1	maker-scf300000870651.0-snap-gene-0.58-mRNA-1	maker-scf300000870744.1-snap-gene-3.21-mRNA-1		maker-scf300000870603.1-snap-gene-0.73-mRNA-1	maker-scf300000870744.1-snap-gene-5.45-mRNA-1	maker-scf300000870735.0-snap-gene-14.9-mRNA-1	snap_masked-scf300000870601.0-processed-gene-19.160-mRNA-1	maker-scf300000870603.0-snap-gene-18.101-mRNA-1	maker-scf300000870747.0-snap-gene-0.6-mRNA-1	maker-scf300000870641.0-snap-gene-0.49-mRNA-1	maker-scf300000870642.2-snap-gene-0.49-mRNA-1	maker-scf300000870673.2-snap-gene-1.59-mRNA-1	maker-scf300000870673.1-snap-gene-1.189-mRNA-1
	snap_masked-scf300000870593.0-processed-gene-3.25-mRNA-1	maker-scf300000870754.0-snap-gene-5.111-mRNA-1	maker-scf300000870749.0-snap-gene-14.94-mRNA-1	snap_masked-scf300000870601.1-processed-gene-2.30-mRNA-1	maker-scf300000870619.2-augustus-gene-2.88-mRNA-1	maker-scf300000870651.1-snap-gene-5.138-mRNA-1	maker-scf300000870603.0-snap-gene-13.62-mRNA-1	maker-scf300000870748.0-snap-gene-1.78-mRNA-1	maker-scf300000870603.1-snap-gene-0.86-mRNA-1	maker-scf300000870681.0-snap-gene-0.46-mRNA-1	maker-scf300000870626.0-snap-gene-0.64-mRNA-1	maker-scf300000870651.1-augustus-gene-2.52-mRNA-1	maker-scf300000870744.1-snap-gene-4.60-mRNA-1		maker-scf300000870603.1-snap-gene-0.78-mRNA-1	maker-scf300000870744.1-snap-gene-5.48-mRNA-1	maker-scf300000870735.0-snap-gene-3.70-mRNA-1	snap_masked-scf300000870601.0-processed-gene-19.62-mRNA-1	maker-scf300000870603.0-snap-gene-18.132-mRNA-1	maker-scf300000870748.0-snap-gene-0.107-mRNA-1	maker-scf300000870641.0-snap-gene-0.50-mRNA-1	maker-scf300000870642.2-snap-gene-0.51-mRNA-1	maker-scf300000870673.2-snap-gene-10.126-mRNA-1	maker-scf300000870673.1-snap-gene-1.215-mRNA-1
	snap_masked-scf300000870593.0-processed-gene-3.34-mRNA-1	maker-scf300000870754.0-snap-gene-6.83-mRNA-1	maker-scf300000870749.0-snap-gene-16.64-mRNA-1	snap_masked-scf300000870601.1-processed-gene-2.7-mRNA-1	maker-scf300000870619.2-snap-gene-0.48-mRNA-1	maker-scf300000870651.1-snap-gene-6.108-mRNA-1	maker-scf300000870603.0-snap-gene-14.117-mRNA-1	maker-scf300000870748.0-snap-gene-1.80-mRNA-1	maker-scf300000870605.0-snap-gene-0.113-mRNA-1	maker-scf300000870693.1-snap-gene-0.57-mRNA-1	maker-scf300000870629.0-snap-gene-1.68-mRNA-1	maker-scf300000870651.1-snap-gene-0.58-mRNA-1	maker-scf300000870744.1-snap-gene-5.18-mRNA-1		maker-scf300000870603.1-snap-gene-0.85-mRNA-1	maker-scf300000870745.0-snap-gene-0.51-mRNA-1	maker-scf300000870735.0-snap-gene-6.1-mRNA-1	snap_masked-scf300000870601.0-processed-gene-3.85-mRNA-1	maker-scf300000870603.0-snap-gene-2.10-mRNA-1	maker-scf300000870748.0-snap-gene-0.109-mRNA-1	maker-scf300000870641.0-snap-gene-1.37-mRNA-1	maker-scf300000870651.0-snap-gene-0.48-mRNA-1	maker-scf300000870673.2-snap-gene-10.129-mRNA-1	maker-scf300000870673.1-snap-gene-1.217-mRNA-1
	snap_masked-scf300000870593.0-processed-gene-4.8-mRNA-1	maker-scf300000870754.0-snap-gene-8.61-mRNA-1	maker-scf300000870749.0-snap-gene-16.65-mRNA-1	snap_masked-scf300000870601.1-processed-gene-3.44-mRNA-1	maker-scf300000870619.2-snap-gene-0.54-mRNA-1	maker-scf300000870651.1-snap-gene-6.126-mRNA-1	maker-scf300000870603.0-snap-gene-14.135-mRNA-1	maker-scf300000870748.0-snap-gene-2.22-mRNA-1	maker-scf300000870605.0-snap-gene-0.119-mRNA-1	maker-scf300000870693.1-snap-gene-2.91-mRNA-1	maker-scf300000870629.0-snap-gene-1.78-mRNA-1	maker-scf300000870651.1-snap-gene-0.64-mRNA-1	maker-scf300000870744.1-snap-gene-5.22-mRNA-1		maker-scf300000870605.0-augustus-gene-0.255-mRNA-1	maker-scf300000870745.0-snap-gene-1.0-mRNA-1	maker-scf300000870735.0-snap-gene-6.12-mRNA-1	snap_masked-scf300000870601.0-processed-gene-4.85-mRNA-1	maker-scf300000870603.0-snap-gene-2.12-mRNA-1	maker-scf300000870748.0-snap-gene-0.96-mRNA-1	maker-scf300000870641.0-snap-gene-1.7-mRNA-1	maker-scf300000870651.1-snap-gene-0.61-mRNA-1	maker-scf300000870673.2-snap-gene-11.25-mRNA-1	maker-scf300000870673.2-augustus-gene-6.4-mRNA-1
	snap_masked-scf300000870593.0-processed-gene-6.15-mRNA-1	maker-scf300000870756.2-snap-gene-0.30-mRNA-1	maker-scf300000870749.0-snap-gene-18.124-mRNA-1	snap_masked-scf300000870601.1-processed-gene-3.49-mRNA-1	maker-scf300000870619.2-snap-gene-0.61-mRNA-1	maker-scf300000870662.0-augustus-gene-2.10-mRNA-1	maker-scf300000870603.0-snap-gene-15.124-mRNA-1	maker-scf300000870748.0-snap-gene-4.180-mRNA-1	maker-scf300000870605.0-snap-gene-0.122-mRNA-1	maker-scf300000870693.1-snap-gene-3.76-mRNA-1	maker-scf300000870629.0-snap-gene-1.89-mRNA-1	maker-scf300000870651.1-snap-gene-1.10-mRNA-1	maker-scf300000870744.1-snap-gene-5.28-mRNA-1		maker-scf300000870605.0-snap-gene-0.118-mRNA-1	maker-scf300000870745.0-snap-gene-1.12-mRNA-1	maker-scf300000870735.0-snap-gene-7.63-mRNA-1	snap_masked-scf300000870601.0-processed-gene-5.51-mRNA-1	maker-scf300000870603.0-snap-gene-3.66-mRNA-1	maker-scf300000870748.0-snap-gene-1.52-mRNA-1	maker-scf300000870641.1-snap-gene-0.0-mRNA-1	maker-scf300000870651.1-snap-gene-1.13-mRNA-1	maker-scf300000870673.2-snap-gene-11.7-mRNA-1	maker-scf300000870673.2-snap-gene-0.12-mRNA-1
	snap_masked-scf300000870593.0-processed-gene-6.22-mRNA-1	snap_masked-deg300000870423-processed-gene-0.69-mRNA-1	maker-scf300000870749.0-snap-gene-18.159-mRNA-1	snap_masked-scf300000870601.1-processed-gene-4.120-mRNA-1	maker-scf300000870619.2-snap-gene-0.62-mRNA-1	maker-scf300000870662.0-snap-gene-0.14-mRNA-1	maker-scf300000870603.0-snap-gene-16.82-mRNA-1	maker-scf300000870748.0-snap-gene-4.190-mRNA-1	maker-scf300000870605.0-snap-gene-0.135-mRNA-1	maker-scf300000870693.1-snap-gene-4.102-mRNA-1	maker-scf300000870629.0-snap-gene-3.50-mRNA-1	maker-scf300000870651.1-snap-gene-3.67-mRNA-1	maker-scf300000870744.1-snap-gene-5.51-mRNA-1		maker-scf300000870605.0-snap-gene-0.123-mRNA-1	maker-scf300000870745.0-snap-gene-2.41-mRNA-1	maker-scf300000870735.0-snap-gene-8.114-mRNA-1	snap_masked-scf300000870601.0-processed-gene-9.44-mRNA-1	maker-scf300000870603.0-snap-gene-3.77-mRNA-1	maker-scf300000870748.0-snap-gene-1.61-mRNA-1	maker-scf300000870641.1-snap-gene-0.17-mRNA-1	maker-scf300000870651.1-snap-gene-1.6-mRNA-1	maker-scf300000870673.2-snap-gene-12.59-mRNA-1	maker-scf300000870673.2-snap-gene-0.5-mRNA-1
	snap_masked-scf300000870593.0-processed-gene-7.164-mRNA-1	snap_masked-scf300000870586.0-processed-gene-0.40-mRNA-1	maker-scf300000870749.0-snap-gene-3.10-mRNA-1	snap_masked-scf300000870601.1-processed-gene-5.48-mRNA-1	maker-scf300000870619.2-snap-gene-0.63-mRNA-1	maker-scf300000870662.0-snap-gene-0.18-mRNA-1	maker-scf300000870603.0-snap-gene-17.22-mRNA-1	maker-scf300000870748.0-snap-gene-4.192-mRNA-1	maker-scf300000870605.0-snap-gene-0.139-mRNA-1	maker-scf300000870693.1-snap-gene-4.79-mRNA-1	maker-scf300000870629.0-snap-gene-4.106-mRNA-1	maker-scf300000870651.1-snap-gene-3.76-mRNA-1	maker-scf300000870745.0-snap-gene-0.49-mRNA-1		maker-scf300000870605.0-snap-gene-0.127-mRNA-1	maker-scf300000870745.0-snap-gene-3.12-mRNA-1	maker-scf300000870743.0-augustus-gene-6.167-mRNA-1	snap_masked-scf300000870601.0-processed-gene-9.49-mRNA-1	maker-scf300000870603.0-snap-gene-3.79-mRNA-1	maker-scf300000870748.0-snap-gene-2.9-mRNA-1	maker-scf300000870641.1-snap-gene-0.24-mRNA-1	maker-scf300000870651.1-snap-gene-1.7-mRNA-1	maker-scf300000870673.2-snap-gene-12.77-mRNA-1	maker-scf300000870673.2-snap-gene-1.55-mRNA-1
	snap_masked-scf300000870595.0-processed-gene-0.51-mRNA-1	snap_masked-scf300000870586.0-processed-gene-1.84-mRNA-1	maker-scf300000870749.0-snap-gene-5.78-mRNA-1	snap_masked-scf300000870603.0-processed-gene-1.63-mRNA-1	maker-scf300000870619.2-snap-gene-1.55-mRNA-1	maker-scf300000870662.0-snap-gene-1.19-mRNA-1	maker-scf300000870603.0-snap-gene-18.116-mRNA-1	maker-scf300000870748.0-snap-gene-4.195-mRNA-1	maker-scf300000870607.0-snap-gene-0.0-mRNA-1	maker-scf300000870730.0-snap-gene-0.34-mRNA-1	maker-scf300000870629.0-snap-gene-5.27-mRNA-1	maker-scf300000870651.1-snap-gene-4.81-mRNA-1	maker-scf300000870745.0-snap-gene-0.61-mRNA-1		maker-scf300000870607.0-snap-gene-0.0-mRNA-1	maker-scf300000870745.0-snap-gene-3.14-mRNA-1	maker-scf300000870743.0-snap-gene-1.55-mRNA-1	snap_masked-scf300000870601.1-processed-gene-1.0-mRNA-1	maker-scf300000870603.0-snap-gene-3.85-mRNA-1	maker-scf300000870748.0-snap-gene-3.15-mRNA-1	maker-scf300000870641.1-snap-gene-0.4-mRNA-1	maker-scf300000870651.1-snap-gene-2.68-mRNA-1	maker-scf300000870673.2-snap-gene-13.55-mRNA-1	maker-scf300000870673.2-snap-gene-1.59-mRNA-1
	snap_masked-scf300000870595.0-processed-gene-1.10-mRNA-1	snap_masked-scf300000870586.0-processed-gene-3.15-mRNA-1	maker-scf300000870749.0-snap-gene-7.3-mRNA-1	snap_masked-scf300000870603.0-processed-gene-11.34-mRNA-1	maker-scf300000870619.2-snap-gene-1.62-mRNA-1	maker-scf300000870662.0-snap-gene-11.0-mRNA-1	maker-scf300000870603.0-snap-gene-18.91-mRNA-1	maker-scf300000870748.0-snap-gene-4.198-mRNA-1	maker-scf300000870607.0-snap-gene-0.5-mRNA-1	maker-scf300000870730.0-snap-gene-0.35-mRNA-1	maker-scf300000870631.0-augustus-gene-1.77-mRNA-1	maker-scf300000870651.1-snap-gene-4.82-mRNA-1	maker-scf300000870745.0-snap-gene-1.3-mRNA-1		maker-scf300000870607.0-snap-gene-0.1-mRNA-1	maker-scf300000870745.0-snap-gene-3.4-mRNA-1	maker-scf300000870743.0-snap-gene-2.15-mRNA-1	snap_masked-scf300000870601.1-processed-gene-2.20-mRNA-1	maker-scf300000870603.0-snap-gene-4.107-mRNA-1	maker-scf300000870748.0-snap-gene-3.24-mRNA-1	maker-scf300000870641.1-snap-gene-0.9-mRNA-1	maker-scf300000870651.1-snap-gene-2.69-mRNA-1	maker-scf300000870673.2-snap-gene-13.61-mRNA-1	maker-scf300000870673.2-snap-gene-1.61-mRNA-1
	snap_masked-scf300000870595.0-processed-gene-2.0-mRNA-1	snap_masked-scf300000870586.0-processed-gene-3.25-mRNA-1	maker-scf300000870749.0-snap-gene-8.26-mRNA-1	snap_masked-scf300000870603.0-processed-gene-11.53-mRNA-1	maker-scf300000870619.2-snap-gene-1.66-mRNA-1	maker-scf300000870662.0-snap-gene-12.69-mRNA-1	maker-scf300000870603.0-snap-gene-2.14-mRNA-1	maker-scf300000870749.0-augustus-gene-18.94-mRNA-1	maker-scf300000870607.1-snap-gene-0.7-mRNA-1	maker-scf300000870733.0-snap-gene-0.197-mRNA-1	maker-scf300000870631.0-augustus-gene-1.78-mRNA-1	maker-scf300000870651.1-snap-gene-5.144-mRNA-1	maker-scf300000870745.0-snap-gene-1.8-mRNA-1		maker-scf300000870607.0-snap-gene-0.10-mRNA-1	maker-scf300000870745.0-snap-gene-3.41-mRNA-1	maker-scf300000870743.0-snap-gene-2.17-mRNA-1	snap_masked-scf300000870601.1-processed-gene-3.2-mRNA-1	maker-scf300000870603.0-snap-gene-4.116-mRNA-1	maker-scf300000870748.0-snap-gene-3.34-mRNA-1	maker-scf300000870642.0-snap-gene-0.18-mRNA-1	maker-scf300000870651.1-snap-gene-2.77-mRNA-1	maker-scf300000870673.2-snap-gene-13.73-mRNA-1	maker-scf300000870673.2-snap-gene-13.61-mRNA-1
	snap_masked-scf300000870595.0-processed-gene-3.16-mRNA-1	snap_masked-scf300000870586.0-processed-gene-3.31-mRNA-1	maker-scf300000870749.0-snap-gene-9.75-mRNA-1	snap_masked-scf300000870603.0-processed-gene-13.33-mRNA-1	maker-scf300000870619.2-snap-gene-1.67-mRNA-1	maker-scf300000870662.0-snap-gene-12.81-mRNA-1	maker-scf300000870603.0-snap-gene-2.8-mRNA-1	maker-scf300000870749.0-augustus-gene-18.97-mRNA-1	maker-scf300000870611.0-snap-gene-0.132-mRNA-1	maker-scf300000870733.0-snap-gene-0.208-mRNA-1	maker-scf300000870631.0-snap-gene-0.125-mRNA-1	maker-scf300000870651.1-snap-gene-5.145-mRNA-1	maker-scf300000870745.0-snap-gene-2.45-mRNA-1		maker-scf300000870607.0-snap-gene-0.12-mRNA-1	maker-scf300000870746.0-augustus-gene-12.50-mRNA-1	maker-scf300000870743.0-snap-gene-2.18-mRNA-1	snap_masked-scf300000870601.1-processed-gene-3.44-mRNA-1	maker-scf300000870603.0-snap-gene-5.4-mRNA-1	maker-scf300000870748.0-snap-gene-4.169-mRNA-1	maker-scf300000870642.2-snap-gene-0.49-mRNA-1	maker-scf300000870651.1-snap-gene-2.79-mRNA-1	maker-scf300000870673.2-snap-gene-14.75-mRNA-1	maker-scf300000870673.2-snap-gene-13.71-mRNA-1
	snap_masked-scf300000870595.0-processed-gene-3.17-mRNA-1	snap_masked-scf300000870586.0-processed-gene-3.37-mRNA-1	maker-scf300000870749.1-snap-gene-0.112-mRNA-1	snap_masked-scf300000870603.0-processed-gene-15.73-mRNA-1	maker-scf300000870619.2-snap-gene-2.20-mRNA-1	maker-scf300000870662.0-snap-gene-12.86-mRNA-1	maker-scf300000870603.0-snap-gene-3.64-mRNA-1	maker-scf300000870749.0-augustus-gene-9.49-mRNA-1	maker-scf300000870611.0-snap-gene-0.147-mRNA-1	maker-scf300000870733.0-snap-gene-0.231-mRNA-1	maker-scf300000870631.0-snap-gene-0.126-mRNA-1	maker-scf300000870651.1-snap-gene-6.103-mRNA-1	maker-scf300000870745.0-snap-gene-3.19-mRNA-1		maker-scf300000870607.0-snap-gene-0.15-mRNA-1	maker-scf300000870746.0-snap-gene-1.24-mRNA-1	maker-scf300000870743.0-snap-gene-2.32-mRNA-1	snap_masked-scf300000870601.1-processed-gene-6.218-mRNA-1	maker-scf300000870603.0-snap-gene-6.49-mRNA-1	maker-scf300000870748.0-snap-gene-4.184-mRNA-1	maker-scf300000870645.0-snap-gene-0.5-mRNA-1	maker-scf300000870651.1-snap-gene-2.80-mRNA-1	maker-scf300000870673.2-snap-gene-14.89-mRNA-1	maker-scf300000870673.2-snap-gene-14.86-mRNA-1
	snap_masked-scf300000870595.0-processed-gene-6.127-mRNA-1	snap_masked-scf300000870593.0-processed-gene-0.65-mRNA-1	maker-scf300000870749.1-snap-gene-0.116-mRNA-1	snap_masked-scf300000870603.0-processed-gene-15.92-mRNA-1	maker-scf300000870619.2-snap-gene-3.108-mRNA-1	maker-scf300000870662.0-snap-gene-12.87-mRNA-1	maker-scf300000870603.0-snap-gene-3.78-mRNA-1	maker-scf300000870749.0-snap-gene-15.107-mRNA-1	maker-scf300000870613.1-snap-gene-0.115-mRNA-1	maker-scf300000870735.0-augustus-gene-4.11-mRNA-1	maker-scf300000870631.0-snap-gene-1.68-mRNA-1	maker-scf300000870651.1-snap-gene-6.108-mRNA-1	maker-scf300000870746.0-snap-gene-1.4-mRNA-1		maker-scf300000870607.0-snap-gene-1.1-mRNA-1	maker-scf300000870746.0-snap-gene-10.70-mRNA-1	maker-scf300000870743.0-snap-gene-2.33-mRNA-1	snap_masked-scf300000870603.0-processed-gene-11.34-mRNA-1	maker-scf300000870603.0-snap-gene-6.51-mRNA-1	maker-scf300000870749.0-snap-gene-0.49-mRNA-1	maker-scf300000870651.1-snap-gene-0.48-mRNA-1	maker-scf300000870651.1-snap-gene-3.58-mRNA-1	maker-scf300000870673.2-snap-gene-15.122-mRNA-1	maker-scf300000870673.2-snap-gene-14.92-mRNA-1
	snap_masked-scf300000870595.0-processed-gene-6.175-mRNA-1	snap_masked-scf300000870593.0-processed-gene-0.87-mRNA-1	maker-scf300000870749.1-snap-gene-0.144-mRNA-1	snap_masked-scf300000870603.0-processed-gene-16.110-mRNA-1	maker-scf300000870619.2-snap-gene-3.121-mRNA-1	maker-scf300000870662.0-snap-gene-3.56-mRNA-1	maker-scf300000870603.0-snap-gene-3.82-mRNA-1	maker-scf300000870749.0-snap-gene-15.112-mRNA-1	maker-scf300000870613.1-snap-gene-0.121-mRNA-1	maker-scf300000870735.0-augustus-gene-6.131-mRNA-1	maker-scf300000870631.0-snap-gene-3.73-mRNA-1	maker-scf300000870651.1-snap-gene-6.117-mRNA-1	maker-scf300000870746.0-snap-gene-11.134-mRNA-1		maker-scf300000870607.0-snap-gene-1.12-mRNA-1	maker-scf300000870746.0-snap-gene-10.72-mRNA-1	maker-scf300000870743.0-snap-gene-2.37-mRNA-1	snap_masked-scf300000870603.0-processed-gene-11.39-mRNA-1	maker-scf300000870603.0-snap-gene-6.59-mRNA-1	maker-scf300000870749.0-snap-gene-10.2-mRNA-1	maker-scf300000870651.1-snap-gene-0.60-mRNA-1	maker-scf300000870651.1-snap-gene-4.70-mRNA-1	maker-scf300000870673.2-snap-gene-15.97-mRNA-1	maker-scf300000870673.2-snap-gene-15.122-mRNA-1
	snap_masked-scf300000870595.1-processed-gene-0.54-mRNA-1	snap_masked-scf300000870593.0-processed-gene-1.60-mRNA-1	maker-scf300000870749.1-snap-gene-0.150-mRNA-1	snap_masked-scf300000870603.0-processed-gene-16.123-mRNA-1	maker-scf300000870619.2-snap-gene-3.122-mRNA-1	maker-scf300000870662.0-snap-gene-3.82-mRNA-1	maker-scf300000870603.0-snap-gene-5.12-mRNA-1	maker-scf300000870749.0-snap-gene-18.116-mRNA-1	maker-scf300000870613.1-snap-gene-0.136-mRNA-1	maker-scf300000870735.0-augustus-gene-6.137-mRNA-1	maker-scf300000870631.0-snap-gene-3.74-mRNA-1	maker-scf300000870651.1-snap-gene-6.124-mRNA-1	maker-scf300000870746.0-snap-gene-2.65-mRNA-1		maker-scf300000870613.1-snap-gene-0.122-mRNA-1	maker-scf300000870746.0-snap-gene-11.136-mRNA-1	maker-scf300000870743.0-snap-gene-2.39-mRNA-1	snap_masked-scf300000870603.0-processed-gene-15.92-mRNA-1	maker-scf300000870603.0-snap-gene-6.65-mRNA-1	maker-scf300000870749.0-snap-gene-11.26-mRNA-1	maker-scf300000870651.1-snap-gene-0.61-mRNA-1	maker-scf300000870651.1-snap-gene-4.77-mRNA-1	maker-scf300000870673.2-snap-gene-2.14-mRNA-1	maker-scf300000870673.2-snap-gene-2.18-mRNA-1
	snap_masked-scf300000870595.1-processed-gene-0.60-mRNA-1	snap_masked-scf300000870593.0-processed-gene-2.47-mRNA-1	maker-scf300000870750.0-snap-gene-0.94-mRNA-1	snap_masked-scf300000870603.0-processed-gene-2.27-mRNA-1	maker-scf300000870619.2-snap-gene-3.131-mRNA-1	maker-scf300000870662.0-snap-gene-4.66-mRNA-1	maker-scf300000870603.0-snap-gene-5.13-mRNA-1	maker-scf300000870749.0-snap-gene-18.136-mRNA-1	maker-scf300000870613.1-snap-gene-0.152-mRNA-1	maker-scf300000870735.0-snap-gene-0.108-mRNA-1	maker-scf300000870631.0-snap-gene-3.83-mRNA-1	maker-scf300000870651.1-snap-gene-6.98-mRNA-1	maker-scf300000870746.0-snap-gene-4.74-mRNA-1		maker-scf300000870619.2-augustus-gene-2.88-mRNA-1	maker-scf300000870746.0-snap-gene-12.125-mRNA-1	maker-scf300000870743.0-snap-gene-2.40-mRNA-1	snap_masked-scf300000870603.0-processed-gene-16.123-mRNA-1	maker-scf300000870603.0-snap-gene-7.1-mRNA-1	maker-scf300000870749.0-snap-gene-12.26-mRNA-1	maker-scf300000870651.1-snap-gene-1.13-mRNA-1	maker-scf300000870651.1-snap-gene-4.80-mRNA-1	maker-scf300000870673.2-snap-gene-2.17-mRNA-1	maker-scf300000870673.2-snap-gene-2.2-mRNA-1
	snap_masked-scf300000870595.1-processed-gene-1.111-mRNA-1	snap_masked-scf300000870593.0-processed-gene-3.12-mRNA-1	maker-scf300000870750.0-snap-gene-1.24-mRNA-1	snap_masked-scf300000870603.0-processed-gene-3.109-mRNA-1	maker-scf300000870619.2-snap-gene-3.143-mRNA-1	maker-scf300000870662.0-snap-gene-5.142-mRNA-1	maker-scf300000870603.0-snap-gene-7.6-mRNA-1	maker-scf300000870749.0-snap-gene-2.14-mRNA-1	maker-scf300000870613.1-snap-gene-0.154-mRNA-1	maker-scf300000870735.0-snap-gene-1.31-mRNA-1	maker-scf300000870631.0-snap-gene-3.98-mRNA-1	maker-scf300000870662.0-snap-gene-0.6-mRNA-1	maker-scf300000870746.0-snap-gene-9.65-mRNA-1		maker-scf300000870619.2-augustus-gene-3.92-mRNA-1	maker-scf300000870746.0-snap-gene-13.164-mRNA-1	maker-scf300000870743.0-snap-gene-2.9-mRNA-1	snap_masked-scf300000870603.0-processed-gene-17.41-mRNA-1	maker-scf300000870603.0-snap-gene-7.2-mRNA-1	maker-scf300000870749.0-snap-gene-13.91-mRNA-1	maker-scf300000870651.1-snap-gene-1.2-mRNA-1	maker-scf300000870651.1-snap-gene-5.124-mRNA-1	maker-scf300000870673.2-snap-gene-2.18-mRNA-1	maker-scf300000870673.2-snap-gene-2.20-mRNA-1
	snap_masked-scf300000870595.1-processed-gene-1.85-mRNA-1	snap_masked-scf300000870593.0-processed-gene-4.47-mRNA-1	maker-scf300000870750.0-snap-gene-1.5-mRNA-1	snap_masked-scf300000870603.0-processed-gene-7.48-mRNA-1	maker-scf300000870619.2-snap-gene-4.121-mRNA-1	maker-scf300000870662.0-snap-gene-6.14-mRNA-1	maker-scf300000870603.0-snap-gene-8.33-mRNA-1	maker-scf300000870749.0-snap-gene-2.31-mRNA-1	maker-scf300000870613.1-snap-gene-0.156-mRNA-1	maker-scf300000870735.0-snap-gene-10.92-mRNA-1	maker-scf300000870631.0-snap-gene-4.55-mRNA-1	maker-scf300000870662.0-snap-gene-1.5-mRNA-1	maker-scf300000870748.0-snap-gene-0.109-mRNA-1		maker-scf300000870619.2-snap-gene-0.47-mRNA-1	maker-scf300000870746.0-snap-gene-2.74-mRNA-1	maker-scf300000870743.0-snap-gene-3.110-mRNA-1	snap_masked-scf300000870603.0-processed-gene-18.1-mRNA-1	maker-scf300000870603.0-snap-gene-8.15-mRNA-1	maker-scf300000870749.0-snap-gene-18.142-mRNA-1	maker-scf300000870651.1-snap-gene-1.4-mRNA-1	maker-scf300000870651.1-snap-gene-5.140-mRNA-1	maker-scf300000870673.2-snap-gene-2.20-mRNA-1	maker-scf300000870673.2-snap-gene-2.4-mRNA-1
	snap_masked-scf300000870595.1-processed-gene-1.87-mRNA-1	snap_masked-scf300000870593.0-processed-gene-4.8-mRNA-1	maker-scf300000870750.0-snap-gene-3.98-mRNA-1	snap_masked-scf300000870605.0-processed-gene-0.7-mRNA-1	maker-scf300000870620.0-snap-gene-0.8-mRNA-1	maker-scf300000870662.0-snap-gene-6.2-mRNA-1	maker-scf300000870603.0-snap-gene-8.4-mRNA-1	maker-scf300000870749.0-snap-gene-4.5-mRNA-1	maker-scf300000870619.0-snap-gene-0.4-mRNA-1	maker-scf300000870735.0-snap-gene-11.53-mRNA-1	maker-scf300000870631.0-snap-gene-4.56-mRNA-1	maker-scf300000870662.0-snap-gene-1.8-mRNA-1	maker-scf300000870748.0-snap-gene-0.113-mRNA-1		maker-scf300000870619.2-snap-gene-1.58-mRNA-1	maker-scf300000870746.0-snap-gene-3.0-mRNA-1	maker-scf300000870743.0-snap-gene-3.116-mRNA-1	snap_masked-scf300000870603.0-processed-gene-2.27-mRNA-1	maker-scf300000870603.0-snap-gene-8.17-mRNA-1	maker-scf300000870749.0-snap-gene-18.148-mRNA-1	maker-scf300000870651.1-snap-gene-1.6-mRNA-1	maker-scf300000870651.1-snap-gene-6.112-mRNA-1	maker-scf300000870673.2-snap-gene-2.6-mRNA-1	maker-scf300000870673.2-snap-gene-2.6-mRNA-1
	snap_masked-scf300000870595.1-processed-gene-1.92-mRNA-1	snap_masked-scf300000870593.0-processed-gene-7.161-mRNA-1	maker-scf300000870750.0-snap-gene-4.117-mRNA-1	snap_masked-scf300000870605.0-processed-gene-0.87-mRNA-1	maker-scf300000870629.0-snap-gene-0.60-mRNA-1	maker-scf300000870662.0-snap-gene-7.76-mRNA-1	maker-scf300000870603.1-snap-gene-0.80-mRNA-1	maker-scf300000870749.0-snap-gene-6.15-mRNA-1	maker-scf300000870619.0-snap-gene-0.5-mRNA-1	maker-scf300000870735.0-snap-gene-11.69-mRNA-1	maker-scf300000870631.0-snap-gene-4.57-mRNA-1	maker-scf300000870662.0-snap-gene-10.15-mRNA-1	maker-scf300000870748.0-snap-gene-0.93-mRNA-1		maker-scf300000870619.2-snap-gene-1.62-mRNA-1	maker-scf300000870746.0-snap-gene-3.17-mRNA-1	maker-scf300000870743.0-snap-gene-4.97-mRNA-1	snap_masked-scf300000870603.0-processed-gene-4.94-mRNA-1	maker-scf300000870603.0-snap-gene-8.19-mRNA-1	maker-scf300000870749.0-snap-gene-18.155-mRNA-1	maker-scf300000870651.1-snap-gene-1.7-mRNA-1	maker-scf300000870651.1-snap-gene-6.121-mRNA-1	maker-scf300000870673.2-snap-gene-3.116-mRNA-1	maker-scf300000870673.2-snap-gene-3.112-mRNA-1
	snap_masked-scf300000870595.1-processed-gene-2.178-mRNA-1	snap_masked-scf300000870595.0-processed-gene-1.10-mRNA-1	maker-scf300000870750.0-snap-gene-4.148-mRNA-1	snap_masked-scf300000870607.0-processed-gene-0.55-mRNA-1	maker-scf300000870629.0-snap-gene-2.53-mRNA-1	maker-scf300000870662.0-snap-gene-7.87-mRNA-1	maker-scf300000870607.0-snap-gene-0.4-mRNA-1	maker-scf300000870749.0-snap-gene-6.5-mRNA-1	maker-scf300000870619.2-snap-gene-0.46-mRNA-1	maker-scf300000870735.0-snap-gene-12.63-mRNA-1	maker-scf300000870631.0-snap-gene-5.116-mRNA-1	maker-scf300000870662.0-snap-gene-10.21-mRNA-1	maker-scf300000870748.0-snap-gene-0.94-mRNA-1		maker-scf300000870619.2-snap-gene-1.67-mRNA-1	maker-scf300000870746.0-snap-gene-3.3-mRNA-1	maker-scf300000870743.0-snap-gene-6.11-mRNA-1	snap_masked-scf300000870603.0-processed-gene-5.66-mRNA-1	maker-scf300000870603.0-snap-gene-8.20-mRNA-1	maker-scf300000870749.0-snap-gene-18.157-mRNA-1	maker-scf300000870651.1-snap-gene-2.69-mRNA-1	maker-scf300000870651.1-snap-gene-6.125-mRNA-1	maker-scf300000870673.2-snap-gene-5.58-mRNA-1	maker-scf300000870673.2-snap-gene-3.119-mRNA-1
	snap_masked-scf300000870595.1-processed-gene-2.196-mRNA-1	snap_masked-scf300000870595.0-processed-gene-1.34-mRNA-1	maker-scf300000870751.0-snap-gene-1.82-mRNA-1	snap_masked-scf300000870607.0-processed-gene-1.53-mRNA-1	maker-scf300000870629.0-snap-gene-2.58-mRNA-1	maker-scf300000870662.0-snap-gene-9.69-mRNA-1	maker-scf300000870607.0-snap-gene-0.9-mRNA-1	maker-scf300000870749.1-snap-gene-0.107-mRNA-1	maker-scf300000870619.2-snap-gene-0.49-mRNA-1	maker-scf300000870735.0-snap-gene-12.75-mRNA-1	maker-scf300000870631.0-snap-gene-5.120-mRNA-1	maker-scf300000870662.0-snap-gene-10.23-mRNA-1	maker-scf300000870748.0-snap-gene-1.52-mRNA-1		maker-scf300000870619.2-snap-gene-2.25-mRNA-1	maker-scf300000870746.0-snap-gene-3.7-mRNA-1	maker-scf300000870743.0-snap-gene-6.21-mRNA-1	snap_masked-scf300000870603.0-processed-gene-6.9-mRNA-1	maker-scf300000870603.0-snap-gene-8.21-mRNA-1	maker-scf300000870749.0-snap-gene-2.19-mRNA-1	maker-scf300000870651.1-snap-gene-2.70-mRNA-1	maker-scf300000870651.1-snap-gene-6.127-mRNA-1	maker-scf300000870673.2-snap-gene-5.71-mRNA-1	maker-scf300000870673.2-snap-gene-4.59-mRNA-1
	snap_masked-scf300000870599.0-processed-gene-1.204-mRNA-1	snap_masked-scf300000870595.0-processed-gene-2.14-mRNA-1	maker-scf300000870751.0-snap-gene-1.84-mRNA-1	snap_masked-scf300000870613.1-processed-gene-0.199-mRNA-1	maker-scf300000870629.0-snap-gene-2.63-mRNA-1	maker-scf300000870673.1-snap-gene-1.185-mRNA-1	maker-scf300000870607.0-snap-gene-1.10-mRNA-1	maker-scf300000870749.1-snap-gene-0.116-mRNA-1	maker-scf300000870619.2-snap-gene-0.56-mRNA-1	maker-scf300000870735.0-snap-gene-14.13-mRNA-1	maker-scf300000870635.0-snap-gene-0.166-mRNA-1	maker-scf300000870662.0-snap-gene-10.5-mRNA-1	maker-scf300000870748.0-snap-gene-1.64-mRNA-1		maker-scf300000870619.2-snap-gene-2.27-mRNA-1	maker-scf300000870746.0-snap-gene-3.9-mRNA-1	maker-scf300000870743.0-snap-gene-6.31-mRNA-1	snap_masked-scf300000870603.1-processed-gene-0.39-mRNA-1	maker-scf300000870603.0-snap-gene-8.22-mRNA-1	maker-scf300000870749.0-snap-gene-3.20-mRNA-1	maker-scf300000870651.1-snap-gene-2.72-mRNA-1	maker-scf300000870651.1-snap-gene-6.88-mRNA-1	maker-scf300000870673.2-snap-gene-5.77-mRNA-1	maker-scf300000870673.2-snap-gene-5.58-mRNA-1
	snap_masked-scf300000870599.0-processed-gene-1.281-mRNA-1	snap_masked-scf300000870595.0-processed-gene-2.7-mRNA-1	maker-scf300000870752.0-snap-gene-3.7-mRNA-1	snap_masked-scf300000870619.0-processed-gene-0.27-mRNA-1	maker-scf300000870629.0-snap-gene-5.20-mRNA-1	maker-scf300000870673.2-snap-gene-0.7-mRNA-1	maker-scf300000870607.0-snap-gene-1.14-mRNA-1	maker-scf300000870750.0-snap-gene-1.0-mRNA-1	maker-scf300000870619.2-snap-gene-0.63-mRNA-1	maker-scf300000870735.0-snap-gene-14.15-mRNA-1	maker-scf300000870635.0-snap-gene-0.178-mRNA-1	maker-scf300000870662.0-snap-gene-11.18-mRNA-1	maker-scf300000870748.0-snap-gene-1.78-mRNA-1		maker-scf300000870619.2-snap-gene-2.8-mRNA-1	maker-scf300000870746.0-snap-gene-4.53-mRNA-1	maker-scf300000870744.0-snap-gene-0.48-mRNA-1	snap_masked-scf300000870605.0-processed-gene-0.14-mRNA-1	maker-scf300000870603.0-snap-gene-8.24-mRNA-1	maker-scf300000870749.0-snap-gene-4.11-mRNA-1	maker-scf300000870651.1-snap-gene-2.77-mRNA-1	maker-scf300000870659.0-snap-gene-0.3-mRNA-1	maker-scf300000870673.2-snap-gene-7.60-mRNA-1	maker-scf300000870673.2-snap-gene-5.65-mRNA-1
	snap_masked-scf300000870599.0-processed-gene-1.285-mRNA-1	snap_masked-scf300000870595.0-processed-gene-4.101-mRNA-1	maker-scf300000870752.0-snap-gene-6.117-mRNA-1	snap_masked-scf300000870619.2-processed-gene-1.15-mRNA-1	maker-scf300000870629.0-snap-gene-6.48-mRNA-1	maker-scf300000870673.2-snap-gene-11.0-mRNA-1	maker-scf300000870607.1-snap-gene-0.3-mRNA-1	maker-scf300000870750.0-snap-gene-1.21-mRNA-1	maker-scf300000870619.2-snap-gene-1.61-mRNA-1	maker-scf300000870735.0-snap-gene-14.48-mRNA-1	maker-scf300000870635.0-snap-gene-0.182-mRNA-1	maker-scf300000870662.0-snap-gene-2.128-mRNA-1	maker-scf300000870748.0-snap-gene-1.80-mRNA-1		maker-scf300000870619.2-snap-gene-3.107-mRNA-1	maker-scf300000870746.0-snap-gene-4.60-mRNA-1	maker-scf300000870744.0-snap-gene-0.63-mRNA-1	snap_masked-scf300000870605.0-processed-gene-0.16-mRNA-1	maker-scf300000870603.0-snap-gene-8.25-mRNA-1	maker-scf300000870749.0-snap-gene-4.17-mRNA-1	maker-scf300000870651.1-snap-gene-2.79-mRNA-1	maker-scf300000870662.0-snap-gene-0.1-mRNA-1	maker-scf300000870673.2-snap-gene-7.64-mRNA-1	maker-scf300000870673.2-snap-gene-5.77-mRNA-1
	snap_masked-scf300000870601.0-processed-gene-13.34-mRNA-1	snap_masked-scf300000870595.0-processed-gene-4.81-mRNA-1	maker-scf300000870752.0-snap-gene-6.133-mRNA-1	snap_masked-scf300000870631.0-processed-gene-4.27-mRNA-1	maker-scf300000870629.0-snap-gene-6.64-mRNA-1	maker-scf300000870673.2-snap-gene-12.65-mRNA-1	maker-scf300000870611.0-snap-gene-0.128-mRNA-1	maker-scf300000870750.0-snap-gene-1.3-mRNA-1	maker-scf300000870619.2-snap-gene-1.64-mRNA-1	maker-scf300000870735.0-snap-gene-14.52-mRNA-1	maker-scf300000870635.0-snap-gene-0.190-mRNA-1	maker-scf300000870662.0-snap-gene-2.140-mRNA-1	maker-scf300000870748.0-snap-gene-2.22-mRNA-1		maker-scf300000870619.2-snap-gene-3.110-mRNA-1	maker-scf300000870746.0-snap-gene-4.69-mRNA-1	maker-scf300000870744.1-snap-gene-3.21-mRNA-1	snap_masked-scf300000870605.0-processed-gene-0.2-mRNA-1	maker-scf300000870603.0-snap-gene-8.26-mRNA-1	maker-scf300000870749.0-snap-gene-5.66-mRNA-1	maker-scf300000870651.1-snap-gene-3.66-mRNA-1	maker-scf300000870662.0-snap-gene-1.14-mRNA-1	maker-scf300000870673.2-snap-gene-8.100-mRNA-1	maker-scf300000870673.2-snap-gene-6.103-mRNA-1
	snap_masked-scf300000870601.0-processed-gene-15.54-mRNA-1	snap_masked-scf300000870595.0-processed-gene-5.106-mRNA-1	maker-scf300000870752.1-snap-gene-1.117-mRNA-1	snap_masked-scf300000870631.0-processed-gene-4.6-mRNA-1	maker-scf300000870629.0-snap-gene-6.70-mRNA-1	maker-scf300000870673.2-snap-gene-12.71-mRNA-1	maker-scf300000870611.0-snap-gene-0.131-mRNA-1	maker-scf300000870750.0-snap-gene-1.5-mRNA-1	maker-scf300000870619.2-snap-gene-1.70-mRNA-1	maker-scf300000870735.0-snap-gene-14.61-mRNA-1	maker-scf300000870635.0-snap-gene-0.192-mRNA-1	maker-scf300000870662.0-snap-gene-2.150-mRNA-1	maker-scf300000870748.0-snap-gene-3.0-mRNA-1		maker-scf300000870619.2-snap-gene-3.111-mRNA-1	maker-scf300000870746.0-snap-gene-5.145-mRNA-1	maker-scf300000870744.1-snap-gene-5.18-mRNA-1	snap_masked-scf300000870605.0-processed-gene-0.7-mRNA-1	maker-scf300000870603.0-snap-gene-8.31-mRNA-1	maker-scf300000870749.0-snap-gene-6.0-mRNA-1	maker-scf300000870651.1-snap-gene-4.70-mRNA-1	maker-scf300000870662.0-snap-gene-1.4-mRNA-1	maker-scf300000870673.2-snap-gene-8.96-mRNA-1	maker-scf300000870673.2-snap-gene-6.106-mRNA-1
	snap_masked-scf300000870601.0-processed-gene-15.68-mRNA-1	snap_masked-scf300000870595.0-processed-gene-6.118-mRNA-1	maker-scf300000870753.0-snap-gene-12.54-mRNA-1	snap_masked-scf300000870631.0-processed-gene-5.205-mRNA-1	maker-scf300000870630.0-snap-gene-0.7-mRNA-1	maker-scf300000870673.2-snap-gene-12.74-mRNA-1	maker-scf300000870611.0-snap-gene-0.142-mRNA-1	maker-scf300000870750.0-snap-gene-3.115-mRNA-1	maker-scf300000870619.2-snap-gene-2.12-mRNA-1	maker-scf300000870735.0-snap-gene-2.62-mRNA-1	maker-scf300000870641.0-snap-gene-0.59-mRNA-1	maker-scf300000870662.0-snap-gene-3.64-mRNA-1	maker-scf300000870748.0-snap-gene-3.12-mRNA-1		maker-scf300000870619.2-snap-gene-3.113-mRNA-1	maker-scf300000870746.0-snap-gene-8.75-mRNA-1	maker-scf300000870744.1-snap-gene-5.28-mRNA-1	snap_masked-scf300000870605.0-processed-gene-0.87-mRNA-1	maker-scf300000870603.0-snap-gene-8.34-mRNA-1	maker-scf300000870749.0-snap-gene-6.2-mRNA-1	maker-scf300000870651.1-snap-gene-4.77-mRNA-1	maker-scf300000870662.0-snap-gene-10.14-mRNA-1	maker-scf300000870673.2-snap-gene-9.133-mRNA-1	maker-scf300000870673.2-snap-gene-7.55-mRNA-1
	snap_masked-scf300000870601.0-processed-gene-17.24-mRNA-1	snap_masked-scf300000870595.0-processed-gene-6.124-mRNA-1	maker-scf300000870753.0-snap-gene-13.102-mRNA-1	snap_masked-scf300000870635.0-processed-gene-0.94-mRNA-1	maker-scf300000870631.0-snap-gene-0.111-mRNA-1	maker-scf300000870673.2-snap-gene-14.65-mRNA-1	maker-scf300000870613.1-snap-gene-0.147-mRNA-1	maker-scf300000870750.0-snap-gene-3.122-mRNA-1	maker-scf300000870619.2-snap-gene-3.131-mRNA-1	maker-scf300000870735.0-snap-gene-2.68-mRNA-1	maker-scf300000870641.0-snap-gene-1.30-mRNA-1	maker-scf300000870662.0-snap-gene-3.73-mRNA-1	maker-scf300000870748.0-snap-gene-3.15-mRNA-1		maker-scf300000870619.2-snap-gene-3.114-mRNA-1	maker-scf300000870746.0-snap-gene-8.86-mRNA-1	maker-scf300000870745.0-snap-gene-1.8-mRNA-1	snap_masked-scf300000870607.0-processed-gene-0.55-mRNA-1	maker-scf300000870603.0-snap-gene-8.35-mRNA-1	maker-scf300000870749.0-snap-gene-7.16-mRNA-1	maker-scf300000870651.1-snap-gene-5.140-mRNA-1	maker-scf300000870662.0-snap-gene-11.11-mRNA-1	maker-scf300000870693.1-snap-gene-1.108-mRNA-1	maker-scf300000870673.2-snap-gene-7.60-mRNA-1
	snap_masked-scf300000870601.0-processed-gene-19.59-mRNA-1	snap_masked-scf300000870595.1-processed-gene-0.84-mRNA-1	maker-scf300000870753.0-snap-gene-13.116-mRNA-1	snap_masked-scf300000870641.0-processed-gene-1.39-mRNA-1	maker-scf300000870631.0-snap-gene-0.112-mRNA-1	maker-scf300000870673.2-snap-gene-14.71-mRNA-1	maker-scf300000870613.1-snap-gene-0.148-mRNA-1	maker-scf300000870751.0-snap-gene-1.101-mRNA-1	maker-scf300000870619.2-snap-gene-3.138-mRNA-1	maker-scf300000870735.0-snap-gene-2.71-mRNA-1	maker-scf300000870641.0-snap-gene-2.100-mRNA-1	maker-scf300000870662.0-snap-gene-3.78-mRNA-1	maker-scf300000870748.0-snap-gene-4.167-mRNA-1		maker-scf300000870619.2-snap-gene-3.127-mRNA-1	maker-scf300000870746.0-snap-gene-9.83-mRNA-1	maker-scf300000870745.0-snap-gene-2.45-mRNA-1	snap_masked-scf300000870607.0-processed-gene-1.72-mRNA-1	maker-scf300000870603.0-snap-gene-8.36-mRNA-1	maker-scf300000870749.0-snap-gene-7.2-mRNA-1	maker-scf300000870651.1-snap-gene-6.112-mRNA-1	maker-scf300000870662.0-snap-gene-11.14-mRNA-1	maker-scf300000870693.1-snap-gene-2.82-mRNA-1	maker-scf300000870673.2-snap-gene-7.64-mRNA-1
	snap_masked-scf300000870601.0-processed-gene-2.86-mRNA-1	snap_masked-scf300000870595.1-processed-gene-2.159-mRNA-1	maker-scf300000870753.0-snap-gene-14.1-mRNA-1	snap_masked-scf300000870641.0-processed-gene-1.56-mRNA-1	maker-scf300000870631.0-snap-gene-0.126-mRNA-1	maker-scf300000870673.2-snap-gene-14.78-mRNA-1	maker-scf300000870613.1-snap-gene-0.152-mRNA-1	maker-scf300000870751.0-snap-gene-1.111-mRNA-1	maker-scf300000870619.2-snap-gene-4.82-mRNA-1	maker-scf300000870735.0-snap-gene-2.73-mRNA-1	maker-scf300000870641.0-snap-gene-2.102-mRNA-1	maker-scf300000870662.0-snap-gene-3.82-mRNA-1	maker-scf300000870748.0-snap-gene-4.180-mRNA-1		maker-scf300000870619.2-snap-gene-3.130-mRNA-1	maker-scf300000870747.0-snap-gene-0.19-mRNA-1	maker-scf300000870746.0-snap-gene-0.54-mRNA-1	snap_masked-scf300000870611.0-processed-gene-0.103-mRNA-1	maker-scf300000870603.0-snap-gene-8.5-mRNA-1	maker-scf300000870749.0-snap-gene-7.5-mRNA-1	maker-scf300000870651.1-snap-gene-6.117-mRNA-1	maker-scf300000870662.0-snap-gene-2.160-mRNA-1	maker-scf300000870693.1-snap-gene-2.86-mRNA-1	maker-scf300000870673.2-snap-gene-7.75-mRNA-1
	snap_masked-scf300000870601.0-processed-gene-2.92-mRNA-1	snap_masked-scf300000870595.1-processed-gene-2.197-mRNA-1	maker-scf300000870753.0-snap-gene-14.21-mRNA-1	snap_masked-scf300000870641.0-processed-gene-1.88-mRNA-1	maker-scf300000870631.0-snap-gene-0.127-mRNA-1	maker-scf300000870673.2-snap-gene-14.93-mRNA-1	maker-scf300000870613.1-snap-gene-0.159-mRNA-1	maker-scf300000870752.0-snap-gene-2.9-mRNA-1	maker-scf300000870626.0-snap-gene-0.61-mRNA-1	maker-scf300000870735.0-snap-gene-3.68-mRNA-1	maker-scf300000870641.0-snap-gene-2.104-mRNA-1	maker-scf300000870662.0-snap-gene-4.71-mRNA-1	maker-scf300000870748.0-snap-gene-4.184-mRNA-1		maker-scf300000870619.2-snap-gene-3.138-mRNA-1	maker-scf300000870747.0-snap-gene-0.3-mRNA-1	maker-scf300000870746.0-snap-gene-10.64-mRNA-1	snap_masked-scf300000870613.1-processed-gene-0.173-mRNA-1	maker-scf300000870603.0-snap-gene-8.7-mRNA-1	maker-scf300000870749.0-snap-gene-9.73-mRNA-1	maker-scf300000870651.1-snap-gene-6.125-mRNA-1	maker-scf300000870662.0-snap-gene-3.56-mRNA-1	maker-scf300000870693.1-snap-gene-3.31-mRNA-1	maker-scf300000870673.2-snap-gene-8.104-mRNA-1
	snap_masked-scf300000870601.0-processed-gene-3.81-mRNA-1	snap_masked-scf300000870599.0-processed-gene-0.60-mRNA-1	maker-scf300000870753.0-snap-gene-16.9-mRNA-1	snap_masked-scf300000870642.2-processed-gene-0.86-mRNA-1	maker-scf300000870631.0-snap-gene-1.58-mRNA-1	maker-scf300000870673.2-snap-gene-14.95-mRNA-1	maker-scf300000870619.2-augustus-gene-3.84-mRNA-1	maker-scf300000870752.0-snap-gene-3.0-mRNA-1	maker-scf300000870629.0-augustus-gene-1.60-mRNA-1	maker-scf300000870735.0-snap-gene-4.86-mRNA-1	maker-scf300000870641.0-snap-gene-2.108-mRNA-1	maker-scf300000870662.0-snap-gene-4.74-mRNA-1	maker-scf300000870748.0-snap-gene-4.198-mRNA-1		maker-scf300000870619.2-snap-gene-3.143-mRNA-1	maker-scf300000870748.0-snap-gene-0.107-mRNA-1	maker-scf300000870746.0-snap-gene-11.129-mRNA-1	snap_masked-scf300000870613.1-processed-gene-0.189-mRNA-1	maker-scf300000870603.0-snap-gene-9.113-mRNA-1	maker-scf300000870749.1-snap-gene-0.112-mRNA-1	maker-scf300000870651.1-snap-gene-6.87-mRNA-1	maker-scf300000870662.0-snap-gene-3.61-mRNA-1	maker-scf300000870693.1-snap-gene-3.72-mRNA-1	maker-scf300000870673.2-snap-gene-8.105-mRNA-1
	snap_masked-scf300000870601.0-processed-gene-4.43-mRNA-1	snap_masked-scf300000870599.0-processed-gene-1.199-mRNA-1	maker-scf300000870753.0-snap-gene-17.6-mRNA-1	snap_masked-scf300000870645.0-processed-gene-0.37-mRNA-1	maker-scf300000870631.0-snap-gene-1.67-mRNA-1	maker-scf300000870673.2-snap-gene-15.112-mRNA-1	maker-scf300000870619.2-snap-gene-0.48-mRNA-1	maker-scf300000870752.0-snap-gene-3.7-mRNA-1	maker-scf300000870629.0-snap-gene-1.70-mRNA-1	maker-scf300000870735.0-snap-gene-4.87-mRNA-1	maker-scf300000870641.0-snap-gene-2.122-mRNA-1	maker-scf300000870662.0-snap-gene-4.77-mRNA-1	maker-scf300000870749.0-augustus-gene-7.87-mRNA-1		maker-scf300000870619.2-snap-gene-3.144-mRNA-1	maker-scf300000870748.0-snap-gene-0.109-mRNA-1	maker-scf300000870746.0-snap-gene-13.168-mRNA-1	snap_masked-scf300000870613.1-processed-gene-0.199-mRNA-1	maker-scf300000870603.0-snap-gene-9.117-mRNA-1	maker-scf300000870749.1-snap-gene-0.139-mRNA-1	maker-scf300000870651.1-snap-gene-6.94-mRNA-1	maker-scf300000870662.0-snap-gene-3.70-mRNA-1	maker-scf300000870693.1-snap-gene-3.82-mRNA-1	maker-scf300000870673.2-snap-gene-8.92-mRNA-1
	snap_masked-scf300000870601.0-processed-gene-4.54-mRNA-1	snap_masked-scf300000870599.0-processed-gene-1.232-mRNA-1	maker-scf300000870753.0-snap-gene-18.3-mRNA-1	snap_masked-scf300000870651.1-processed-gene-0.92-mRNA-1	maker-scf300000870631.0-snap-gene-2.16-mRNA-1	maker-scf300000870673.2-snap-gene-2.20-mRNA-1	maker-scf300000870619.2-snap-gene-0.62-mRNA-1	maker-scf300000870752.0-snap-gene-3.9-mRNA-1	maker-scf300000870629.0-snap-gene-1.86-mRNA-1	maker-scf300000870735.0-snap-gene-4.88-mRNA-1	maker-scf300000870641.0-snap-gene-2.123-mRNA-1	maker-scf300000870662.0-snap-gene-5.113-mRNA-1	maker-scf300000870749.0-snap-gene-11.36-mRNA-1		maker-scf300000870619.2-snap-gene-4.100-mRNA-1	maker-scf300000870748.0-snap-gene-0.96-mRNA-1	maker-scf300000870746.0-snap-gene-13.180-mRNA-1	snap_masked-scf300000870619.2-processed-gene-0.111-mRNA-1	maker-scf300000870603.0-snap-gene-9.120-mRNA-1	maker-scf300000870750.0-snap-gene-2.127-mRNA-1	maker-scf300000870662.0-snap-gene-1.18-mRNA-1	maker-scf300000870662.0-snap-gene-3.76-mRNA-1	maker-scf300000870714.0-augustus-gene-0.0-mRNA-1	maker-scf300000870673.2-snap-gene-9.121-mRNA-1
	snap_masked-scf300000870601.0-processed-gene-5.71-mRNA-1	snap_masked-scf300000870599.0-processed-gene-1.262-mRNA-1	maker-scf300000870753.0-snap-gene-19.6-mRNA-1	snap_masked-scf300000870651.1-processed-gene-1.41-mRNA-1	maker-scf300000870631.0-snap-gene-2.17-mRNA-1	maker-scf300000870673.2-snap-gene-3.125-mRNA-1	maker-scf300000870619.2-snap-gene-0.63-mRNA-1	maker-scf300000870752.0-snap-gene-5.20-mRNA-1	maker-scf300000870629.0-snap-gene-3.45-mRNA-1	maker-scf300000870735.0-snap-gene-4.98-mRNA-1	maker-scf300000870641.0-snap-gene-2.125-mRNA-1	maker-scf300000870662.0-snap-gene-5.135-mRNA-1	maker-scf300000870749.0-snap-gene-12.25-mRNA-1		maker-scf300000870619.2-snap-gene-4.101-mRNA-1	maker-scf300000870748.0-snap-gene-1.52-mRNA-1	maker-scf300000870746.0-snap-gene-2.59-mRNA-1	snap_masked-scf300000870619.2-processed-gene-2.37-mRNA-1	maker-scf300000870603.0-snap-gene-9.130-mRNA-1	maker-scf300000870750.0-snap-gene-3.104-mRNA-1	maker-scf300000870662.0-snap-gene-1.4-mRNA-1	maker-scf300000870662.0-snap-gene-4.52-mRNA-1	maker-scf300000870733.0-snap-gene-0.211-mRNA-1	maker-scf300000870681.0-snap-gene-0.47-mRNA-1
	snap_masked-scf300000870601.0-processed-gene-6.2-mRNA-1	snap_masked-scf300000870599.0-processed-gene-1.273-mRNA-1	maker-scf300000870753.0-snap-gene-19.9-mRNA-1	snap_masked-scf300000870651.1-processed-gene-3.52-mRNA-1	maker-scf300000870631.0-snap-gene-2.4-mRNA-1	maker-scf300000870673.2-snap-gene-4.70-mRNA-1	maker-scf300000870619.2-snap-gene-1.61-mRNA-1	maker-scf300000870752.0-snap-gene-6.118-mRNA-1	maker-scf300000870629.0-snap-gene-6.65-mRNA-1	maker-scf300000870735.0-snap-gene-5.18-mRNA-1	maker-scf300000870641.0-snap-gene-2.126-mRNA-1	maker-scf300000870662.0-snap-gene-5.137-mRNA-1	maker-scf300000870749.0-snap-gene-13.89-mRNA-1		maker-scf300000870619.2-snap-gene-4.102-mRNA-1	maker-scf300000870748.0-snap-gene-3.15-mRNA-1	maker-scf300000870746.0-snap-gene-3.23-mRNA-1	snap_masked-scf300000870619.2-processed-gene-2.57-mRNA-1	maker-scf300000870603.0-snap-gene-9.137-mRNA-1	maker-scf300000870750.0-snap-gene-3.107-mRNA-1	maker-scf300000870662.0-snap-gene-10.10-mRNA-1	maker-scf300000870662.0-snap-gene-4.55-mRNA-1	maker-scf300000870733.0-snap-gene-0.226-mRNA-1	maker-scf300000870681.0-snap-gene-0.49-mRNA-1
	snap_masked-scf300000870601.0-processed-gene-6.36-mRNA-1	snap_masked-scf300000870599.0-processed-gene-1.281-mRNA-1	maker-scf300000870753.0-snap-gene-2.0-mRNA-1	snap_masked-scf300000870651.1-processed-gene-4.12-mRNA-1	maker-scf300000870631.0-snap-gene-2.8-mRNA-1	maker-scf300000870673.2-snap-gene-5.62-mRNA-1	maker-scf300000870619.2-snap-gene-1.67-mRNA-1	maker-scf300000870752.0-snap-gene-6.123-mRNA-1	maker-scf300000870629.0-snap-gene-6.78-mRNA-1	maker-scf300000870735.0-snap-gene-5.8-mRNA-1	maker-scf300000870641.0-snap-gene-2.128-mRNA-1	maker-scf300000870662.0-snap-gene-5.145-mRNA-1	maker-scf300000870749.0-snap-gene-18.126-mRNA-1		maker-scf300000870619.2-snap-gene-4.116-mRNA-1	maker-scf300000870748.0-snap-gene-3.24-mRNA-1	maker-scf300000870746.0-snap-gene-4.48-mRNA-1	snap_masked-scf300000870619.2-processed-gene-4.128-mRNA-1	maker-scf300000870603.0-snap-gene-9.138-mRNA-1	maker-scf300000870750.0-snap-gene-4.124-mRNA-1	maker-scf300000870662.0-snap-gene-11.14-mRNA-1	maker-scf300000870662.0-snap-gene-4.68-mRNA-1	maker-scf300000870733.0-snap-gene-0.238-mRNA-1	maker-scf300000870693.1-snap-gene-0.50-mRNA-1
	snap_masked-scf300000870601.0-processed-gene-7.105-mRNA-1	snap_masked-scf300000870599.0-processed-gene-1.285-mRNA-1	maker-scf300000870753.0-snap-gene-2.12-mRNA-1	snap_masked-scf300000870651.1-processed-gene-4.46-mRNA-1	maker-scf300000870631.0-snap-gene-3.73-mRNA-1	maker-scf300000870673.2-snap-gene-6.104-mRNA-1	maker-scf300000870619.2-snap-gene-2.10-mRNA-1	maker-scf300000870752.0-snap-gene-6.125-mRNA-1	maker-scf300000870629.0-snap-gene-6.79-mRNA-1	maker-scf300000870735.0-snap-gene-6.8-mRNA-1	maker-scf300000870641.0-snap-gene-2.96-mRNA-1	maker-scf300000870662.0-snap-gene-6.2-mRNA-1	maker-scf300000870749.0-snap-gene-18.146-mRNA-1		maker-scf300000870619.2-snap-gene-4.84-mRNA-1	maker-scf300000870748.0-snap-gene-3.34-mRNA-1	maker-scf300000870746.0-snap-gene-4.56-mRNA-1	snap_masked-scf300000870629.0-processed-gene-0.67-mRNA-1	maker-scf300000870603.0-snap-gene-9.139-mRNA-1	maker-scf300000870750.0-snap-gene-4.134-mRNA-1	maker-scf300000870662.0-snap-gene-11.21-mRNA-1	maker-scf300000870662.0-snap-gene-4.76-mRNA-1	maker-scf300000870735.0-augustus-gene-14.256-mRNA-1	maker-scf300000870693.1-snap-gene-1.117-mRNA-1
	snap_masked-scf300000870601.0-processed-gene-8.66-mRNA-1	snap_masked-scf300000870601.0-processed-gene-10.89-mRNA-1	maker-scf300000870753.0-snap-gene-20.10-mRNA-1	snap_masked-scf300000870651.1-processed-gene-4.52-mRNA-1	maker-scf300000870631.0-snap-gene-3.76-mRNA-1	maker-scf300000870673.2-snap-gene-6.114-mRNA-1	maker-scf300000870619.2-snap-gene-3.122-mRNA-1	maker-scf300000870752.1-snap-gene-0.48-mRNA-1	maker-scf300000870631.0-snap-gene-0.120-mRNA-1	maker-scf300000870735.0-snap-gene-7.60-mRNA-1	maker-scf300000870641.1-snap-gene-0.13-mRNA-1	maker-scf300000870662.0-snap-gene-7.67-mRNA-1	maker-scf300000870749.0-snap-gene-18.148-mRNA-1		maker-scf300000870619.2-snap-gene-4.87-mRNA-1	maker-scf300000870748.0-snap-gene-4.204-mRNA-1	maker-scf300000870746.0-snap-gene-4.60-mRNA-1	snap_masked-scf300000870629.0-processed-gene-2.79-mRNA-1	maker-scf300000870603.0-snap-gene-9.147-mRNA-1	maker-scf300000870750.0-snap-gene-4.146-mRNA-1	maker-scf300000870662.0-snap-gene-11.24-mRNA-1	maker-scf300000870662.0-snap-gene-5.126-mRNA-1	maker-scf300000870735.0-snap-gene-0.103-mRNA-1	maker-scf300000870693.1-snap-gene-1.122-mRNA-1
[truncated: 1,384 more rows]

## Sheet: Combined response types
HL	+Fe	Day	LL	-Fe	Night
augustus_masked-deg300000870423-processed-gene-0.112-mRNA-1	augustus_masked-deg300000870423-processed-gene-0.131-mRNA-1	augustus_masked-deg300000870423-processed-gene-0.112-mRNA-1	augustus_masked-deg300000870423-processed-gene-0.112-mRNA-1	augustus_masked-deg300000870423-processed-gene-0.112-mRNA-1	augustus_masked-deg300000870423-processed-gene-0.117-mRNA-1
[truncated: 3,694 more rows]
